# Supplementary material for: Regioselective synthesis of difluoroalkyl/perfluoroalkyl enones via Pd-catalyzed four-component carbonylative coupling reactions
Source: Royal Society of Chemistry journal article supplement (doi:10.1039/c7cc00259a), 2017-01-01

# Regioselective Synthesis of Difluoroalkyl/Perfluoroalkyl Enones via Pd-Catalyzed Four-component Carbonylative Coupling Reactions

Qiang Wang, Lan Zheng, Yu-Tao He, and Yong-Min Liang\*

State Key Laboratory of Applied Organic Chemistry, Lanzhou University, Lanzhou 730000, P.R. China

State Key Laboratory of Solid Lubrication, Lanzhou Institute of Chemical Physics, Chinese Academy of Sciences, Lanzhou, 730000, P.R. China

\*E-mail: [liangym@lzu.edu.cn](mailto:liangym@lzu.edu.cn).

## Table of Contents

|          |                                                                                                                                         |                |
|----------|-----------------------------------------------------------------------------------------------------------------------------------------|----------------|
| <b>1</b> | <b>General Remarks</b>                                                                                                                  | <b>S2</b>      |
| <b>2</b> | <b>General Experimental Procedure</b>                                                                                                   | <b>S2</b>      |
| <b>3</b> | <b>Optimization of Difluoroalkylation Reaction Conditions</b>                                                                           | <b>S2-S7</b>   |
| <b>4</b> | <b>Optimization of Perfluoroalkylation Reaction Conditions</b>                                                                          | <b>S7-S10</b>  |
| <b>5</b> | <b>Characterization Data of 4a-4q, 5a-5s and 6a-6j</b>                                                                                  | <b>S11-S29</b> |
| <b>6</b> | <b><sup>1</sup>H NMR, <sup>13</sup>C NMR, <sup>19</sup>F NMR Spectra for Substrates 4a-4q, 5a-5s, 6a-6j and 1D-NOESY for Product 4k</b> | <b>S29-S85</b> |

## 1. General Remarks

All commercially available organic compounds were purchased from adamas-beta, Alfa Asar, and accelachem in China. Unless otherwise noted, reactions were carried out under an carbon monoxide atmosphere. DMF was distilled from  $Mg_2SO_4$  under reduced pressure before used.

For Column chromatography, 200-300 mesh silica gel was employed. Analytical TLC was performed with silica gel GF254 plates.  $^1H$  NMR (400 MHz),  $^{13}C$  NMR (100 MHz) and  $^{19}F$  NMR (376 MHz) were recorded in  $CDCl_3$  using TMS as internal standard. IR spectra were recorded on a FT-IR spectrometer and only major peaks are reported in  $cm^{-1}$ . All new products were further characterized by high resolution mass spectra (HRMS); copies of their  $^1H$  NMR,  $^{13}C$  NMR and  $^{19}F$  NMR spectra are provided. All solvents were dried under standard method.

## 2. General experimental procedure

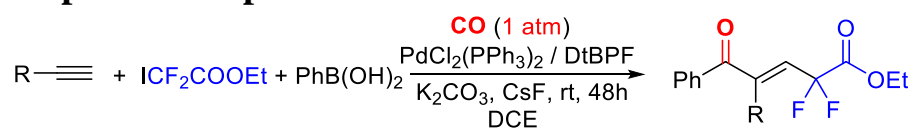

An oven-dried tube was charged with  $K_2CO_3$  (0.30 mmol, 1.5 equiv), DtBPF (10 mol %),  $PdCl_2(PPh_3)_2$  (10 mol %), arylboronic acid (0.22 mmol, 1.1 equiv), alkynes (0.20 mmol, 1.0equiv) and CsF (0.20 mmol, 1.0equiv). The tube was evacuated and backfilled with CO (repeated six times per 10 seconds). Then, DCE (1.5 mL) was injected after ethyl difluoroiodoacetate (0.38 mmol, 1.9 equiv) were added into the tube. The reaction mixture was stirring at rt for 48 h. The balloon was then removed. Water (3 mL) was added, and the product was extracted with DCM ( $3 \times 10$  mL). The combined organic layers were washed with saturated brine, dried over  $Na_2SO_4$ , concentrated in vacuum and purified by flash column chromatography (silica gel) to afford the product.

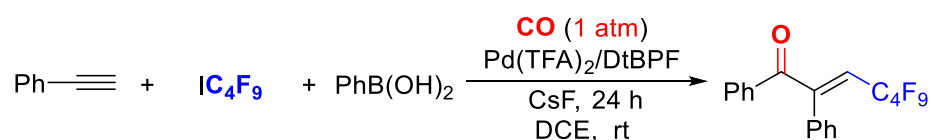

An oven-dried tube was charged with DtBPF (10 mol %),  $Pd(TFA)_2$  (10 mol %), arylboronic acid (0.22 mmol, 1.1 equiv), alkynes (0.20 mmol, 1.0 equiv) and CsF (0.40 mmol, 2.0 equiv). The tube was evacuated and backfilled with CO (repeated six times per 10 seconds). Then, DCE (1.5 mL) was injected after ethyl difluoroiodoacetate (0.40 mmol, 2.0 equiv) were added into the tube. The reaction mixture was stirring at rt for 24 h. The balloon was then removed. Water (3 mL) was added, and the product was extracted with DCM ( $3 \times 10$  mL). The combined organic layers were washed with saturated brine, dried over  $Na_2SO_4$ , concentrated in vacuum and purified by flash column chromatography (silica gel) to afford the product.

## 3. Optimization of Difluoroalkylation Reaction Conditions

### A: Optimization with Phenylacetylene as Substrate

#### A.1. Solvent Effect

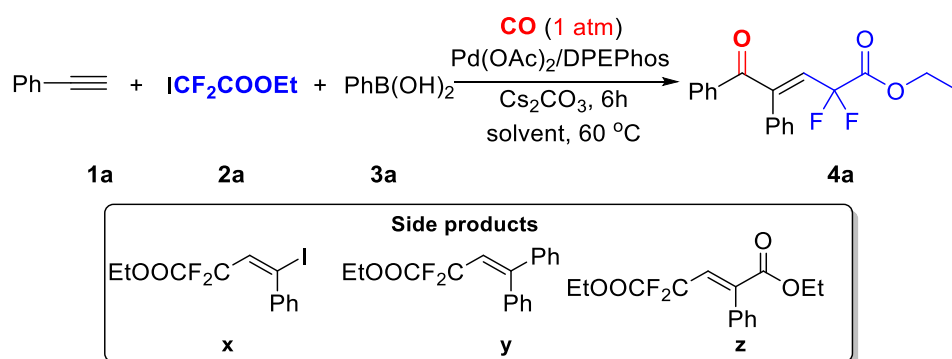

| Solvent Effect     |             |                                 |
|--------------------|-------------|---------------------------------|
| Entry <sup>a</sup> | Solvent     | Yield (%) <sup>b</sup> 4a/x/y/z |
| 1                  | toluene     | 12/12/30/3                      |
| 2                  | DMF         | trace                           |
| 3                  | DCE         | 17/6/40/7                       |
| 4                  | THF         | trace                           |
| 5                  | NMP         | trace                           |
| 6                  | 1,4-dioxane | 10/5/20/0                       |
| 8                  | MeCN        | trace                           |

<sup>a</sup> Reaction conditions: **1a** (0.10 mmol, 1.0 equiv), ICF<sub>2</sub>COOEt (0.15 mmol, 1.5 equiv), PhB(OH)<sub>2</sub> (1.5 mmol, 1.5 equiv), Cs<sub>2</sub>CO<sub>3</sub> (0.1 mmol, 1.0 equiv), Pd(OAc)<sub>2</sub> (5 mol %), DPEPhos (10 mol %), solvent (1.5 mL), 60 °C, 6 h, CO (1 atm).

<sup>b</sup> Determined by GC (phenylate was used as internal standard).

### A.2. Catalyst Effect at 60 °C

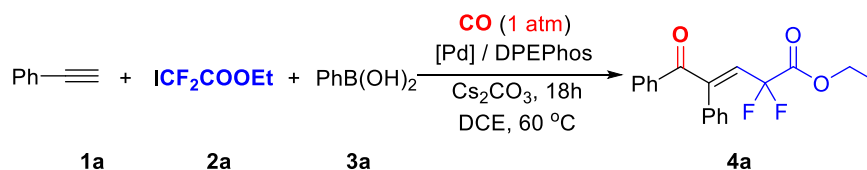

| Catalyst Effect at 60 °C |                                                    |                                 |
|--------------------------|----------------------------------------------------|---------------------------------|
| Entry <sup>a</sup>       | Catalyst                                           | Yield (%) <sup>b</sup> 4a/x/y/z |
| 1                        | Pd(TFA) <sub>2</sub>                               | trace                           |
| 2                        | PdCl <sub>2</sub> (PPh <sub>3</sub> ) <sub>2</sub> | 20/26/3/7                       |
| 3                        | PdCl <sub>2</sub> (dppp) <sub>2</sub>              | trace                           |
| 4                        | PdCl <sub>2</sub> (dppf) <sub>2</sub>              | 16/12/2/0                       |
| 5                        | PdCl <sub>2</sub> (PCy <sub>3</sub> ) <sub>2</sub> | trace                           |
| 6                        | K <sub>2</sub> PdCl <sub>4</sub>                   | trace                           |
| 7                        | PdCl <sub>2</sub> (MeCN) <sub>2</sub>              | 18/14/8/0                       |

<sup>a</sup> Reaction conditions: **1a** (0.10 mmol, 1.0 equiv), ICF<sub>2</sub>COOEt (0.15 mmol, 1.5 equiv), PhB(OH)<sub>2</sub> (0.15 mmol, 1.5 equiv), Cs<sub>2</sub>CO<sub>3</sub> (0.10 mmol, 1.0 equiv), Pd-catalyst (5 mol %), DPEPhos (10 mol %), DCE (1.5 mL), 60 °C, 18 h, CO (1 atm).

<sup>b</sup> Determined by GC (phenylate was used as internal standard).

### A.3. Ligand Effect

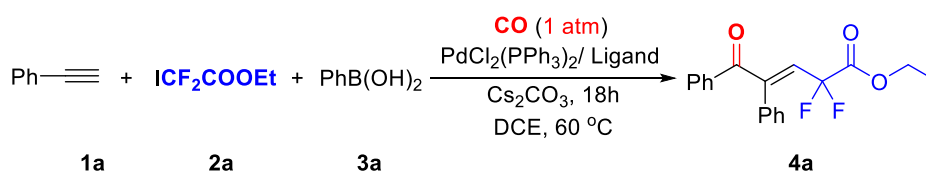

| Ligand Effect      |          |                                 |
|--------------------|----------|---------------------------------|
| Entry <sup>a</sup> | Ligand   | Yield (%) <sup>b</sup> 4a/x/y/z |
| 1                  | DPEPhos  | 17/40/0/0                       |
| 2                  | XantPhos | 5/10/20/0                       |
| 3                  | X-Phos   | 17/15/13/0                      |
| 4                  | dppe     | 0/30/0/0                        |
| 5                  | dppb     | 10/32/0/0                       |
| 6                  | dppf     | 20/20/10/0                      |
| 7                  | SPhos    | 15/10/8/0                       |
| 8                  | Phen     | 0/30/30/0                       |
| 9                  | L1       | 10/20/0/0                       |
| 10                 | L2       | 0/0/0/0                         |
| 11                 | L3       | 17/10/8/0                       |
| 12 <sup>c</sup>    | DtBPF    | 79/0/10/6                       |

<sup>a</sup> Reaction conditions: **1a** (0.10 mmol, 1.0 equiv), ICF<sub>2</sub>COOEt (0.15 mmol, 1.5 equiv), PhB(OH)<sub>2</sub> (0.15 mmol, 1.5 equiv), Cs<sub>2</sub>CO<sub>3</sub> (0.10 mmol, 1.0 equiv), PdCl<sub>2</sub>(PPh<sub>3</sub>)<sub>2</sub> (5 mol %), Ligand (5 mol %), DCE (1.5 mL), 60 °C, 18 h, under CO (1 atm).  
<sup>b</sup> Determined by GC (phenylate was used as internal standard).  
<sup>c</sup> The reaction was performed 1a/2a/3a=1.0/1.9/1.1, K<sub>2</sub>CO<sub>3</sub> (1.5 equiv), rt, 48 h, under CO (1 atm).

#### A.4. Temperature Effect

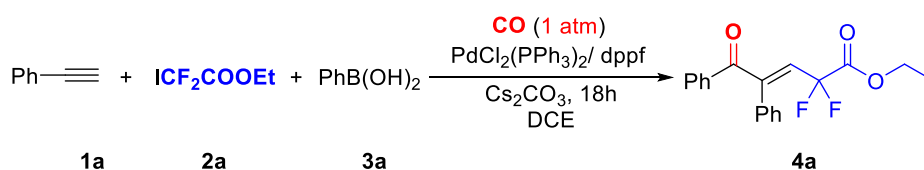

| Temperature Effect |                  |                                 |
|--------------------|------------------|---------------------------------|
| Entry <sup>a</sup> | Temperature (°C) | Yield (%) <sup>b</sup> 4a/x/y/z |
| 1                  | 100              | 0/0/76/0                        |
| 2                  | 80               | 20/0/45/0                       |
| 3                  | 60               | 25/0/20/0                       |
| 4                  | 40               | 29/0/15/0                       |
| 5                  | RT               | 31/0/8/0                        |

<sup>a</sup> Reaction conditions: **1a** (0.10 mmol, 1.0 equiv), ICF<sub>2</sub>COOEt (0.15 mmol, 1.5 equiv), PhB(OH)<sub>2</sub> (0.15 mmol, 1.5 equiv), Cs<sub>2</sub>CO<sub>3</sub> (0.10 mmol, 1.0 equiv), PdCl<sub>2</sub>(PPh<sub>3</sub>)<sub>2</sub> (5 mol %), Ligand (5 mol %), DCE (1.5 mL), 18 h, under CO (1 atm).

<sup>b</sup> Determined by GC (phenylate was used as internal standard).

### A.5. Base Effect

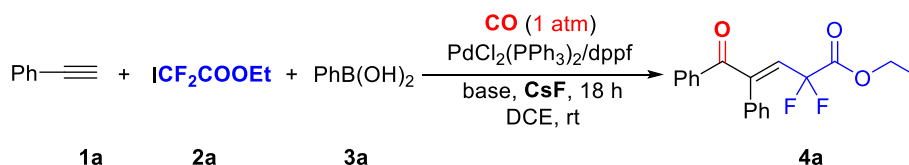

| Base Effect        |                                       |                                 |
|--------------------|---------------------------------------|---------------------------------|
| Entry <sup>a</sup> | Base (equiv)                          | Yield (%) <sup>b</sup> 4a/x/y/z |
| 1                  | Cs <sub>2</sub> CO <sub>3</sub> (1.5) | 43/0/20/10                      |
| 2                  | K <sub>2</sub> CO <sub>3</sub> (1.5)  | 47/0/13/6                       |
| 3                  | K <sub>3</sub> PO <sub>4</sub> (1.5)  | 45/0/11/8                       |
| 4                  | KOAc (1.5)                            | 21/15/12/0                      |
| 5                  | KO <sup>t</sup> Bu (1.5)              | 19/21/13/0                      |
| 6                  | CsOAc (1.5)                           | trace                           |

<sup>a</sup> Reaction conditions: **1a** (0.10 mmol, 1.0 equiv), ICF<sub>2</sub>COOEt (0.15 mmol, 1.5 equiv), PhB(OH)<sub>2</sub> (0.15 mmol, 1.5 equiv), base (x equiv), PdCl<sub>2</sub>(PPh<sub>3</sub>)<sub>2</sub> (5 mol %), dppf (5 mol %), CsF (0.1 mmol, 1.0 equiv), DCE (1.5 mL), 18 h, under CO (1 atm).

<sup>b</sup> Determined by GC (phenylate was used as internal standard).

<sup>c</sup> CsF was no used.

### A.6. Catalyst Effect at Room Temperature

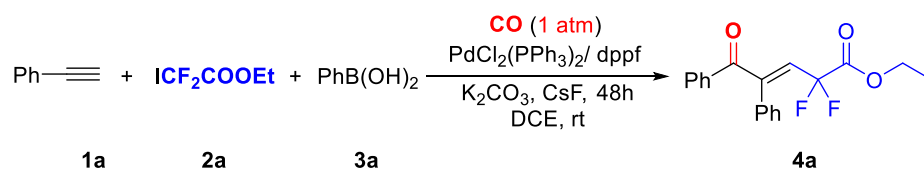

| The effects of the amount of Pd(PPh <sub>3</sub> ) <sub>4</sub> |                     |                                 |
|-----------------------------------------------------------------|---------------------|---------------------------------|
| Entry <sup>a</sup>                                              | Catalyst (10 mol %) | Yield (%) <sup>b</sup> 4a/x/y/z |

|                |                                                    |            |
|----------------|----------------------------------------------------|------------|
| 1 <sup>c</sup> | PdCl <sub>2</sub> (PPh <sub>3</sub> ) <sub>2</sub> | 51/0/18/6  |
| 2              | PdCl <sub>2</sub> (PPh <sub>3</sub> ) <sub>2</sub> | 59/0/16/9  |
| 3              | PdCl <sub>2</sub>                                  | 38/3/15/6  |
| 4              | PdCl <sub>2</sub> (dppf) <sub>2</sub>              | 40/2/12/3  |
| 5              | Pd(PPh <sub>3</sub> ) <sub>4</sub>                 | 47/5/12/3  |
| 6              | Pd(TFA) <sub>2</sub>                               | 20/25/10/3 |
| 7              | PdCl <sub>2</sub> (MeCN) <sub>2</sub>              | 23/10/17/6 |

<sup>a</sup> Reaction conditions: **1a** (0.10 mmol, 1.0 equiv), ICF<sub>2</sub>COOEt (0.15 mmol, 1.5 equiv), PhB(OH)<sub>2</sub> (0.15 mmol, 1.5 equiv), base (0.15 mmol, 1.5 equiv), Pd-catalyst (x mol %), dppf (10 mol %), CsF (0.1 mmol, 1.0 equiv), DCE (1.5 mL), 18 h, under CO (1 atm).

<sup>b</sup> Determined by GC (phenylate was used as internal standard).

<sup>c</sup> without CsF.

### A.7. The Ratio of 1a/2a/3a Effect

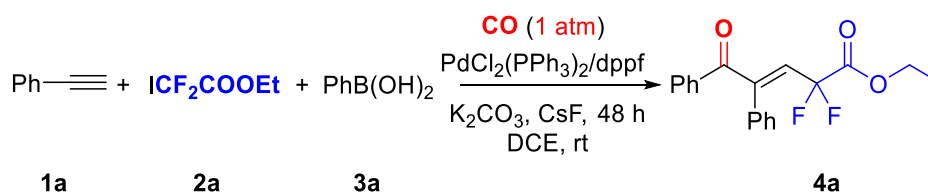

| The ratio of 1a/2a/3a effects. |                  |                                 |
|--------------------------------|------------------|---------------------------------|
| Entry <sup>a</sup>             | 1a/2a/3a (equiv) | Yield (%) <sup>b</sup> 4a/x/y/z |
| 1                              | 1/1.1/1.9        | 54/0/12/3                       |
| 2                              | 1/1.1/1.5        | 53/0/10/4                       |
| 3                              | 1/1.1/1.1        | 55/0/13/6                       |
| 4                              | 1/1.5/1.5        | 59/0/12/3                       |
| 5                              | 1/1.5/1.1        | 63/0/17/6                       |
| 6                              | 1/1.9/1.1        | 70/0/13/5                       |
| 7 <sup>c</sup>                 | 1/1.9/1.1        | 79 (75) <sup>d</sup> /0/10/6    |

<sup>a</sup> Reaction conditions: **1a** (x equiv), ICF<sub>2</sub>COOEt (y equiv), PhB(OH)<sub>2</sub> (z equiv), K<sub>2</sub>CO<sub>3</sub> (0.15 mmol, 1.5 equiv), PdCl<sub>2</sub>(PPh<sub>3</sub>)<sub>2</sub> (10 mol %), dppf (10 mol %), CsF (0.1 mmol, 1.0 equiv), DCE (1.5 mL), rt, 48 h, under CO (1 atm).

<sup>b</sup> Determined by GC (phenylate was used as internal standard).

<sup>c</sup> DtBPF was used instead of dppf.

<sup>d</sup> Isolated yield.

### A.8. The effects of CsF

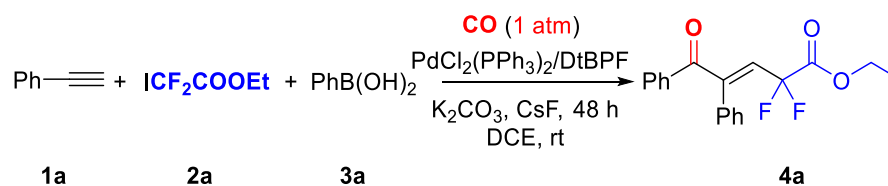

| CsF effects        |             |                        |
|--------------------|-------------|------------------------|
| Entry <sup>a</sup> | CsF (equiv) | Yield (%) <sup>b</sup> |
| 1                  | 0           | 13                     |
| 2 <sup>c</sup>     | 0           | 69                     |
| 3                  | 0.5         | 62                     |
| 4                  | 1.0         | 79                     |
| 5                  | 2.0         | 60                     |

<sup>a</sup> Reaction conditions: **1a** (0.10 mmol, 1.0 equiv), ICF<sub>2</sub>COOEt (0.19 mmol, 1.9 equiv), PhB(OH)<sub>2</sub> (0.11 mmol, 1.1 equiv), K<sub>2</sub>CO<sub>3</sub> (0.15 mmol, 1.5 equiv), PdCl<sub>2</sub>(PPh<sub>3</sub>)<sub>2</sub> (10 mol %), DtBPF (10 mol %), DCE (1.5 mL), 48 h, under CO (1 atm).  
<sup>b</sup> Determined by GC (phenylate was used as internal standard).  
<sup>c</sup> The reaction was carried out for 6 days.

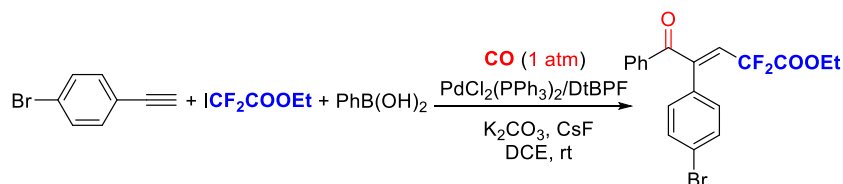

| CsF effects        |             |          |                        |
|--------------------|-------------|----------|------------------------|
| Entry <sup>a</sup> | CsF (equiv) | Time (h) | Yield (%) <sup>b</sup> |
| 1                  | 1.0         | 48       | 47                     |
| 2                  | 0           | 48       | 30                     |
| 3                  | 0           | 72       | 45                     |

<sup>a</sup> Reaction conditions: **1a** (0.10 mmol, 1.0 equiv), ICF<sub>2</sub>COOEt (0.19 mmol, 1.9 equiv), PhB(OH)<sub>2</sub> (0.11 mmol, 1.1 equiv), K<sub>2</sub>CO<sub>3</sub> (0.15 mmol, 1.5 equiv), PdCl<sub>2</sub>(PPh<sub>3</sub>)<sub>2</sub> (10 mol %), DtBPF (10 mol %), DCE (1.5 mL), under CO (1 atm).  
<sup>b</sup> Isolated yield.

## A.9. Control reactions

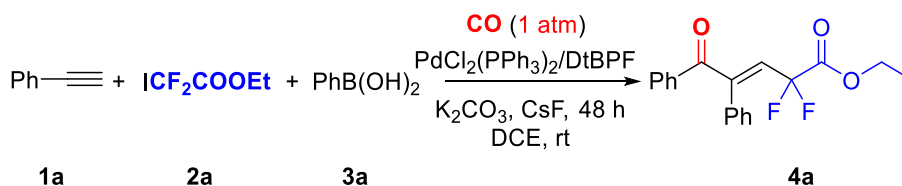

| Control reactions  |                    |                                 |
|--------------------|--------------------|---------------------------------|
| Entry <sup>a</sup> | remarks            | Yield (%) <sup>b</sup> 4a/x/y/z |
| 1                  | No Pd-catalyst     | NR                              |
| 2                  | No base            | <10/40/12/0                     |
| 3                  | No base and no CsF | NR                              |

<sup>a</sup> Reaction conditions: **1a** (0.10 mmol, 1.0 equiv), ICF<sub>2</sub>COOEt (0.19 mmol, 1.9 equiv), PhB(OH)<sub>2</sub> (0.11 mmol, 1.1 equiv), K<sub>2</sub>CO<sub>3</sub> (0.15 mmol, 1.5 equiv), PdCl<sub>2</sub>(PPh<sub>3</sub>)<sub>2</sub> (10 mol %), DtBPF (10 mol %), CsF (0.1 mmol, 1.0 equiv), DCE (1.5 mL), 48 h, under CO (1 atm).  
<sup>b</sup> Determined by GC (phenylate was used as internal standard).

## 4. Optimization of Perfluoroalkylation Reaction Conditions

### A: Optimization with Phenylacetylene as Substrate

#### A.1. Pd-catalyst Effect

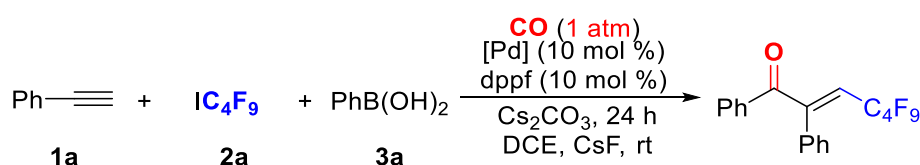

| Pd-catalyst Effect |                                                    |                        |
|--------------------|----------------------------------------------------|------------------------|
| Entry <sup>a</sup> | Solvent                                            | Yield (%) <sup>b</sup> |
| 1                  | Pd(TFA) <sub>2</sub>                               | 15                     |
| 2                  | PdCl <sub>2</sub> (PPh <sub>3</sub> ) <sub>2</sub> | <10                    |
| 3                  | PdCl <sub>2</sub> (dppf) <sub>2</sub>              | trace                  |
| 4                  | PdCl <sub>2</sub> (MeCN) <sub>2</sub>              | trace                  |
| 5                  | Pd(OAc) <sub>2</sub>                               | 0                      |
| 6                  | Pd(PPh <sub>3</sub> ) <sub>4</sub>                 | trace                  |
| 7                  | PdCl <sub>2</sub> (PCy <sub>3</sub> ) <sub>2</sub> | trace                  |

<sup>a</sup> Reaction conditions: **1a** (0.10 mmol, 1.0 equiv), **2a** (0.13 mmol, 1.3 equiv), PhB(OH)<sub>2</sub> (1.1 mmol, 1.1 equiv), Cs<sub>2</sub>CO<sub>3</sub> (0.15mmol, 1.5 equiv), Pd-catalyst (10 mol %), dppf (10 mol%), CsF (0.10mmol, 1.0 equiv), DCE (1.5 mL), rt, 24 h, CO (1 atm).  
<sup>b</sup> Determined by GC (phenylate was used as internal standard).

### A.2. Solvent Effect

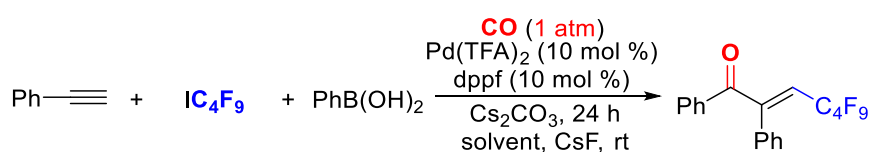

| Solvent Effect     |             |                        |
|--------------------|-------------|------------------------|
| Entry <sup>a</sup> | Solvent     | Yield (%) <sup>b</sup> |
| 1                  | 1,4-dioxane | <10                    |
| 2                  | THF         | <10                    |
| 3                  | toluence    | <10                    |
| 4                  | MeCN        | 0                      |
| 5                  | DCE         | 15                     |

<sup>a</sup> Reaction conditions: **1a** (0.10 mmol, 1.0 equiv), **2a** (0.13 mmol, 1.3 equiv), PhB(OH)<sub>2</sub> (1.1 mmol, 1.1 equiv), Cs<sub>2</sub>CO<sub>3</sub> (0.15mmol, 1.5 equiv), Pd(TFA)<sub>2</sub> (10 mol %), dppf (10 mol%), CsF (0.10mmol, 1.0 equiv), solvent (1.5 mL), rt, 24 h, CO (1 atm).  
<sup>b</sup> Determined by GC (phenylate was used as internal standard).

### A.3. Ligand Effect

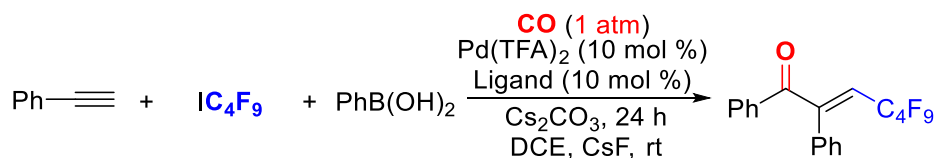

| Ligand Effect      |          |                        |
|--------------------|----------|------------------------|
| Entry <sup>a</sup> | Ligand   | Yield (%) <sup>b</sup> |
| 1                  | DPEPhos  | trace                  |
| 2                  | XantPhos | trace                  |
| 3                  | X-Phos   | <10                    |
| 4                  | dppe     | trace                  |
| 5                  | dppb     | trace                  |
| 6                  | dppp     | trace                  |
| 7                  | dppf     | 15                     |
| 8                  | DtBPF    | 20                     |
| 9                  | IMes HCl | trace                  |
| 10                 | SPhos    | trace                  |
| 11                 | tBuXPhos | <10                    |
| 12                 | RuPhos   | trace                  |



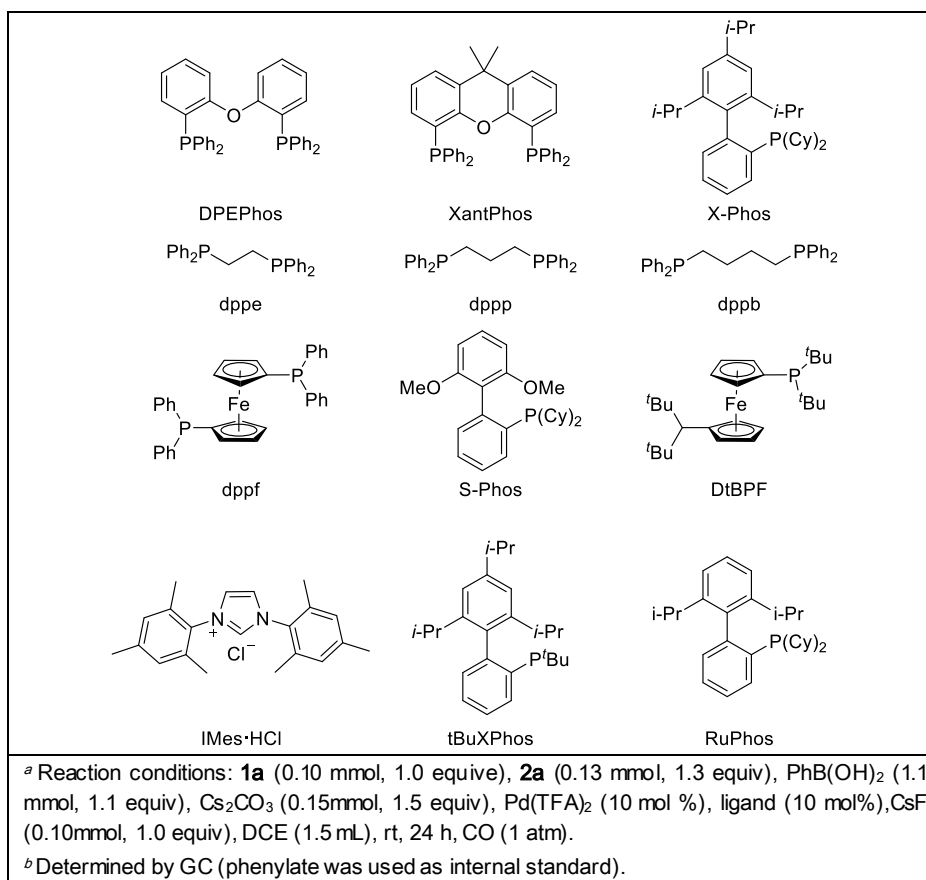

#### A.4. Base Effect

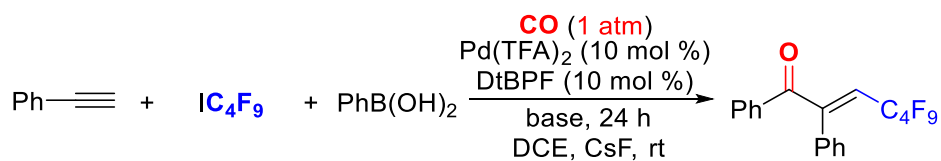

| Base Effect        |                                       |           |                        |
|--------------------|---------------------------------------|-----------|------------------------|
| Entry <sup>a</sup> | Base (equiv)                          |           | Yield (%) <sup>b</sup> |
| 1                  | Cs <sub>2</sub> CO <sub>3</sub> (1.5) | CsF (1.0) | 20                     |
| 2                  | CsOAc (1.5)                           | CsF (1.0) | 13                     |
| 3                  | K <sub>2</sub> CO <sub>3</sub> (2.0)  | CsF (1.0) | 23                     |
| 4                  | KOAc (1.5)                            | CsF (1.0) | <10                    |
| 5                  | K <sub>3</sub> PO <sub>4</sub> (1.5)  | CsF (1.0) | 25                     |
| 6                  | NaHCO <sub>3</sub> (1.5)              | CsF (1.0) | trace                  |
| 7                  | CsOAc (1.5)                           | CsF (1.0) | 17                     |
| 8                  | KO <sup>t</sup> Bu (1.5)              | CsF (1.0) | 27                     |
| 9                  | NaO <sup>t</sup> Bu (1.5)             | CsF (1.0) | 27                     |
| 10                 | LiO <sup>t</sup> Bu (1.5)             | CsF (1.0) | 17                     |
| 11                 | KO <sup>t</sup> Bu (1.9)              | CsF (1.0) | 21                     |
| 12                 | KO <sup>t</sup> Bu (1.1)              | CsF (1.0) | 33                     |
| 13                 | KO <sup>t</sup> Bu (0.5)              | CsF (1.0) | 40                     |
| 14                 | KO <sup>t</sup> Bu (1.1)              | -         | <10                    |
| 15                 | -                                     | CsF (1.0) | 43                     |
| 16                 | -                                     | CsF (1.5) | 50                     |
| 17                 | -                                     | CsF (2.0) | 58                     |

<sup>a</sup> Reaction conditions: **1a** (0.10 mmol, 1.0 equiv), **2a** (0.13 mmol, 1.3 equiv), PhB(OH)<sub>2</sub> (1.1

mmol, 1.1 equiv), base (x equiv), Pd(TFA)<sub>2</sub> (10 mol %), DtBPF (10 mol%), CsF (y equiv), DCE (1.5 mL), rt, 24 h, CO (1 atm).

<sup>b</sup> Determined by GC (phenylate was used as internal standard).

### A.5. The Amount of Pd-Catalyst Effect

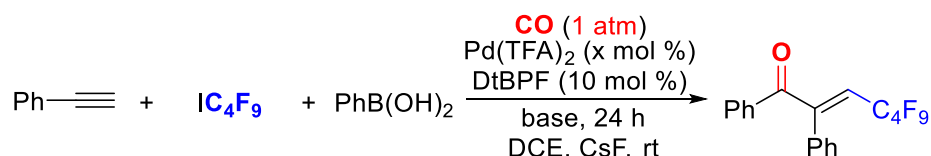

| The effects of the amount of Pd(PPh <sub>3</sub> ) <sub>4</sub> |                             |                        |
|-----------------------------------------------------------------|-----------------------------|------------------------|
| Entry <sup>a</sup>                                              | Catalyst (mol %)            | Yield (%) <sup>b</sup> |
| 1                                                               | Pd(TFA) <sub>2</sub> (2.5)  | 23                     |
| 2                                                               | Pd(TFA) <sub>2</sub> (5.0)  | 45                     |
| 3                                                               | Pd(TFA) <sub>2</sub> (10.0) | 58                     |

<sup>a</sup> Reaction conditions: **1a** (0.10 mmol, 1.0 equiv), **2a** (0.13 mmol, 1.3 equiv), PhB(OH)<sub>2</sub> (1.1 mmol, 1.1 equiv), Pd(TFA)<sub>2</sub> (x mol %), DtBPF (10 mol%), CsF (0.20 mmol, 2.0 equiv), DCE (1.5 mL), rt, 24 h, CO (1 atm).

<sup>b</sup> Determined by GC (phenylate was used as internal standard).

### A.6. The Amount of IC<sub>4</sub>F<sub>9</sub> Effect

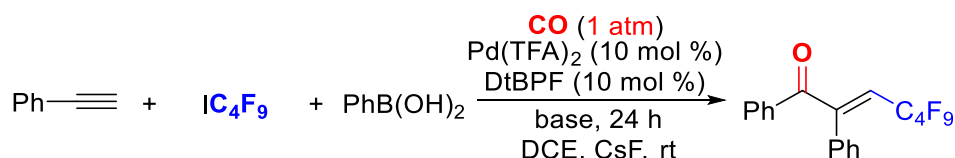

| The ratio of 1a/2a/3a effects. |                                        |                        |
|--------------------------------|----------------------------------------|------------------------|
| Entry <sup>a</sup>             | IC <sub>4</sub> F <sub>9</sub> (equiv) | Yield (%) <sup>b</sup> |
| 1                              | 1.1                                    | 58                     |
| 2                              | 1.5                                    | 62                     |
| 3                              | 2.0                                    | 70(65) <sup>c</sup>    |

<sup>a</sup> Reaction conditions: **1a** (0.10 mmol, 1.0 equiv), **2a** (x, equiv), PhB(OH)<sub>2</sub> (1.1 mmol, 1.1 equiv), Pd(TFA)<sub>2</sub> (10 mol %), DtBPF (10 mol%), CsF (0.20 mmol, 2.0 equiv), DCE (1.5 mL), rt, 24 h, CO (1 atm).

<sup>b</sup> Determined by GC (phenylate was used as internal standard).

<sup>c</sup> Isolated yield.

## 5. Characterization Data of 4a-4q, 5a-5s and 6a-6j.

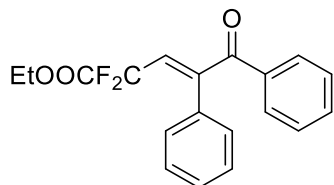

### ethyl (E)-2,2-difluoro-5-oxo-4,5-diphenylpent-3-enoate (4a)

Yellow oil, 75% yield (49.5 mg), E/Z>20:1.

$^1\text{H NMR}$  (400 MHz, Chloroform-*d*)  $\delta$  7.95 – 7.93 (m, 2H), 7.61 – 7.57 (m, 1H), 7.49 – 7.45 (m, 2H), 7.36 (s, 5H), 6.25 (t,  $J = 11.2$  Hz, 1H), 3.97 (q,  $J = 7.2$  Hz, 2H), 1.18 (t,  $J = 7.2$  Hz, 3H).

$^{13}\text{C NMR}$  (100 MHz, Chloroform-*d*)  $\delta$  194.7 , 162.6 (t,  $J = 33.2$  Hz), 148.7 (t,  $J = 8.4$  Hz), 135.6 , 133.7 , 133.0 , 130.1 , 129.1 , 128.9 , 128.7 , 128.3 , 126.5 (t,  $J = 28.6$  Hz), 111.8 (t,  $J = 247.5$  Hz), 63.1 , 13.6 .

$^{19}\text{F NMR}$  (376 MHz, Chloroform-*d*)  $\delta$  -93.4.

HRMS: m/z (ESI) calculated  $[\text{M}+\text{H}]^+$ : 331.1140, measured: 331.1141.

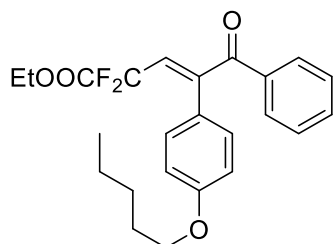

### ethyl (E)-2,2-difluoro-5-oxo-4-(4-(pentyloxy)phenyl)-5-phenylpent-3-enoate (4b)

Brown oil, 73% yield (60.7 mg), E/Z=17:1.

$^1\text{H NMR}$  (400 MHz, Chloroform-*d*)  $\delta$  7.92 (d,  $J = 7.2$  Hz, 2H), 7.57 (t,  $J = 7.2$  Hz, 1H), 7.46 (t,  $J = 7.6$  Hz, 2H), 7.27 (d,  $J = 8.4$  Hz, 2H), 6.85 (d,  $J = 8.8$  Hz, 2H), 6.16 (t,  $J = 11.2$  Hz, 1H), 4.00 (q,  $J = 7.2$  Hz, 2H), 3.93 (t,  $J = 6.4$  Hz, 2H), 1.78 – 1.73 (m, 2H), 1.44 – 1.34 (m, 4H), 1.18 (t,  $J = 7.2$  Hz, 3H), 0.92 (t,  $J = 7.2$  Hz, 3H).

$^{13}\text{C NMR}$  (100 MHz, Chloroform-*d*)  $\delta$  195.2 , 162.8 (t,  $J = 33.4$  Hz), 160.0 , 148.7 (t,  $J = 8.5$  Hz), 135.8 , 133.5 , 130.4 , 130.1 , 128.6 , 125.2 (t,  $J = 28.6$  Hz), 125.0 , 114.3 , 112.0 (t,  $J = 246.9$  Hz), 68.0 , 63.1 , 28.8 , 28.1 , 22.4 , 13.9 , 13.6 .

$^{19}\text{F NMR}$  (376 MHz, Chloroform-*d*)  $\delta$  -92.8.

HRMS: m/z (ESI) calculated  $[\text{M}+\text{NH}_4]^+$ : 434.2137, measured: 434.2136.

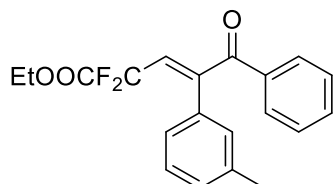

### ethyl (E)-2,2-difluoro-5-oxo-5-phenyl-4-(m-tolyl)pent-3-enoate (4c)

Yellow oil, 65% yield (44.7 mg), E/Z=10:1.

$^1\text{H NMR}$  (400 MHz, Chloroform-*d*)  $\delta$  7.95 – 7.93 (m, 2H), 7.60 – 7.53 (m, 1H), 7.49 – 7.45 (m, 2H), 7.25 – 7.22 (m, 1H), 7.16 (s, 3H), 6.21 (t,  $J = 11.2$  Hz, 1H), 3.96 (q,  $J = 7.2$  Hz, 2H), 2.33 (s, 3H), 1.17 (t,  $J = 7.2$  Hz,

3H).

$^{13}\text{C}$  NMR (100 MHz, Chloroform-*d*)  $\delta$  194.8 , 162.6 (t,  $J = 33.2$  Hz), 148.8 (t,  $J = 8.5$  Hz), 138.0 , 135.6 , 133.6 , 132.9 , 130.1 , 129.9 , 129.4 , 128.7 , 128.2 , 126.2 (t,  $J = 28.8$  Hz), 126.0 , 111.9 (t,  $J = 247.2$  Hz), 63.0 , 21.3 , 13.6 .

$^{19}\text{F}$  NMR (376 MHz, Chloroform-*d*)  $\delta$  -93.2.

HRMS:  $m/z$  (ESI) calculated  $[\text{M}+\text{NH}_4]^+$ : 362.1562, measured: 362.1564.

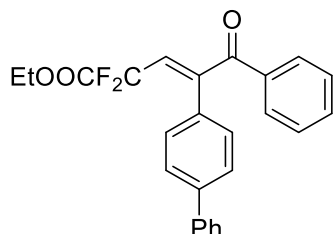

**ethyl (E)-4-([1,1'-biphenyl]-4-yl)-2,2-difluoro-5-oxo-5-phenylpent-3-enoate (4d)**

Colourless oil, 65% yield (52.8 mg), E/Z=7:1.

$^1\text{H}$  NMR (400 MHz, Chloroform-*d*)  $\delta$  7.96 (d,  $J = 7.2$  Hz, 2H), 7.60 – 7.55 (m, 5H), 7.48 (d,  $J = 7.8$  Hz, 2H), 7.45 – 7.40 (m, 4H), 7.36 – 7.34 (m, 1H), 6.27 (t,  $J = 11.2$  Hz, 1H), 4.00 (q,  $J = 7.2$  Hz, 2H), 1.16 (t,  $J = 7.2$  Hz, 3H).

$^{13}\text{C}$  NMR (100 MHz, Chloroform-*d*)  $\delta$  195.5 , 163.4 (t,  $J = 32.8$  Hz), 149.1 (t,  $J = 8.3$  Hz), 142.7 , 140.8 , 136.4 , 134.4 , 132.6 , 130.9 , 130.1 , 129.5 , 129.4 , 128.4 , 127.7 , 127.6 , 119.8 (t,  $J = 25.4$  Hz), 112.6 (t,  $J = 247.8$  Hz), 63.9 , 14.4 .

$^{19}\text{F}$  NMR (376 MHz, Chloroform-*d*)  $\delta$  -93.4.

HRMS:  $m/z$  (ESI) calculated  $[\text{M}+\text{NH}_4]^+$ : 424.1719, measured: 424.1717.

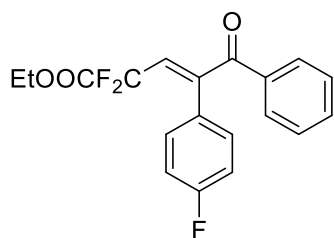

**ethyl (E)-2,2-difluoro-4-(4-fluorophenyl)-5-oxo-5-phenylpent-3-enoate (4e)**

Yellow oil, 72% yield (50.1 mg), E/Z=15:1.

$^1\text{H}$  NMR (400 MHz, Chloroform-*d*)  $\delta$  7.93 – 7.91 (m, 2H), 7.61 – 7.58 (m, 1H), 7.50 – 7.46 (m, 2H), 7.38 – 7.34 (m, 2H), 7.05 (t,  $J = 8.4$  Hz, 2H), 6.27 (t,  $J = 11.6$  Hz, 1H), 4.06 (q,  $J = 7.2$  Hz, 2H), 1.21 (t,  $J = 7.2$  Hz, 3H).

$^{13}\text{C}$  NMR (100 MHz, Chloroform-*d*)  $\delta$  194.5 , 163.1 (d,  $J = 248.1$  Hz), 162.6 (t,  $J = 33.2$  Hz), 147.5 (t,  $J = 8.0$  Hz), 135.4 , 133.7 , 130.9 (d,  $J = 8.3$  Hz), 130.0 , 129.2 (d,  $J = 51.1$  Hz), 128.7 , 127.0 (t,  $J = 28.2$  Hz), 115.3 (d,  $J = 21.7$  Hz), 111.8 (t,  $J = 248.3$  Hz), 63.2 , 13.6 .

$^{19}\text{F}$  NMR (376 MHz, Chloroform-*d*)  $\delta$  -94.1, -111.5.

HRMS:  $m/z$  (ESI) calculated  $[\text{M}+\text{NH}_4]^+$ : 366.1312, measured: 366.1311.

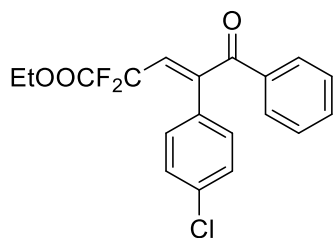

**ethyl (E)-4-(4-chlorophenyl)-2,2-difluoro-5-oxo-5-phenylpent-3-enoate (4f)**

Brown oil, 51% yield (37.1 mg), E/Z=4:1.

$^1\text{H NMR}$  (400 MHz, Chloroform-*d*)  $\delta$  7.92 – 7.90 (m, 2H), 7.63 – 7.59 (m, 1H), 7.51 – 7.47 (m, 2H), 7.36 – 7.32 (m, 4H), 6.27 (t,  $J = 11.4$  Hz, 1H), 4.08 (q,  $J = 7.2$  Hz, 2H), 1.23 (t,  $J = 7.2$  Hz, 3H).

$^{13}\text{C NMR}$  (100 MHz, Chloroform-*d*)  $\delta$  194.4 , 162.6 (t,  $J = 33.2$  Hz), 147.4 (t,  $J = 7.7$  Hz), 135.4 , 135.4 , 133.8 , 131.4 , 130.3 , 130.1 , 128.8 , 128.5 , 127.3 (t,  $J = 28.2$  Hz), 111.7 (t,  $J = 248.8$  Hz), 63.3 , 13.7 .

$^{19}\text{F NMR}$  (376 MHz, Chloroform-*d*)  $\delta$  -94.4.

HRMS:  $m/z$  (ESI) calculated  $[\text{M}+\text{NH}_4]^+$ : 382.1006, measured: 382.1005.

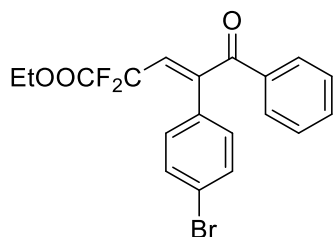

**ethyl (E)-4-(4-bromophenyl)-2,2-difluoro-5-oxo-5-phenylpent-3-enoate (4g)**

Yellow oil, 47% yield (38.4 mg), E/Z>20:1.

$^1\text{H NMR}$  (400 MHz, Chloroform-*d*)  $\delta$  7.92 – 7.90 (m, 2H), 7.63 – 7.59 (m, 1H), 7.51 – 7.47 (m, 4H), 7.26 – 7.23 (m, 2H), 6.27 (t,  $J = 11.6$  Hz, 1H), 4.08 (q,  $J = 7.2$  Hz, 2H), 1.23 (t,  $J = 7.2$  Hz, 3H).

$^{13}\text{C NMR}$  (100 MHz, Chloroform-*d*)  $\delta$  194.3 , 162.6 (t,  $J = 33.1$  Hz), 147.4 (t,  $J = 7.7$  Hz), 135.4 , 133.8 , 131.9 , 131.5 , 130.5 , 130.1 , 128.8 , 127.2 (t,  $J = 28.1$  Hz), 123.6 , 111.7 (t,  $J = 248.9$  Hz), 63.4 , 13.7 .

$^{19}\text{F NMR}$  (376 MHz, Chloroform-*d*)  $\delta$  -94.5.

HRMS:  $m/z$  (ESI) calculated  $[\text{M}+\text{H}]^+$ : 409.0245, measured: 409.0246.

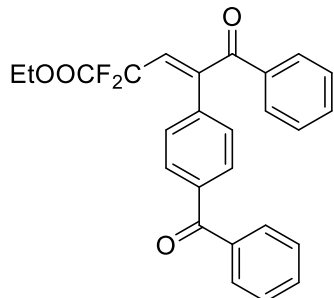

**ethyl (E)-4-(4-benzoylphenyl)-2,2-difluoro-5-oxo-5-phenylpent-3-enoate (4h)**

Brown oil, 45% yield (39.1 mg), E/Z=10:1.

$^1\text{H NMR}$  (400 MHz, Chloroform-*d*)  $\delta$  7.84 – 7.81 (m, 4H), 7.63 – 7.59 (m, 1H), 7.52 – 7.49 (m, 2H), 7.36 – 7.33 (m, 5H), 7.28 – 7.26 (m, 2H), 6.33 (t,  $J = 12.4$  Hz, 1H), 4.06 (q,  $J = 7.2$  Hz, 2H), 1.24 (t,  $J = 7.2$  Hz, 3H).

$^{13}\text{C NMR}$  (100 MHz, Chloroform-*d*)  $\delta$  196.1 , 163.4 (t,  $J = 33.8$  Hz), 150.0 (t,  $J = 8.5$  Hz), 141.4 , 139.8 , 137.4 , 137.3 , 132.6 , 130.0 , 129.6 , 129.4 , 128.5 , 128.3 (d,  $J = 3.5$  Hz), 128.3, 127.8 , 119.8 (t,  $J = 27.4$  Hz), 115.3 , 112.3 (t,  $J = 247.1$  Hz), 63.0 , 13.8 .

$^{19}\text{F NMR}$  (376 MHz, Chloroform-*d*)  $\delta$  -92.5.

HRMS:  $m/z$  (ESI) calculated  $[\text{M}+\text{NH}_4]^+$ :452.1668, measured: 452.1664.

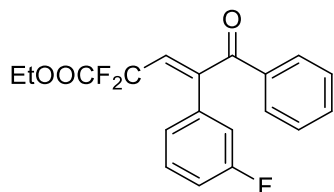

**ethyl (E)-2,2-difluoro-4-(3-fluorophenyl)-5-oxo-5-phenylpent-3-enoate (4i)**

Colourless oil, 40% yield (27.8 mg), E/Z=12:1.

$^1\text{H NMR}$  (400 MHz, Chloroform-*d*)  $\delta$  7.94 – 7.92 (m, 2H), 7.63 – 7.59 (m, 1H), 7.51 – 7.47 (m, 2H), 7.36 – 7.31 (m, 1H), 7.16 – 7.04 (m, 3H), 6.28 (t,  $J = 11.6$  Hz, 1H), 4.09 (q,  $J = 7.2$  Hz, 2H), 1.24 (t,  $J = 7.2$  Hz, 3H).

$^{13}\text{C NMR}$  (100 MHz, Chloroform-*d*)  $\delta$  194.2, 162.6 (t,  $J = 32.9$  Hz), 162.3 (d,  $J = 247.5$  Hz), 147.2 (t,  $J = 7.9$  Hz), 135.4, 134.9 (d,  $J = 8.2$  Hz), 133.9, 130.1, 129.9 (d,  $J = 8.3$  Hz), 128.8, 127.4 (t,  $J = 28.3$  Hz), 124.8, 116.1 (d,  $J = 21.0$  Hz), 116.1 (d,  $J = 22.7$  Hz), 111.7 (t,  $J = 247.2$  Hz), 63.3, 13.7.

$^{19}\text{F NMR}$  (376 MHz, Chloroform-*d*)  $\delta$  -94.5, -112.3.

HRMS:  $m/z$  (ESI) calculated  $[\text{M}+\text{NH}_4]^+$ : 366.1312, measured: 366.1311.

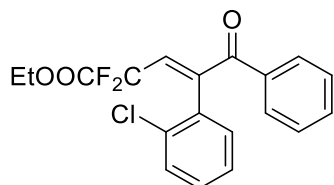

**ethyl (E)-4-(2-chlorophenyl)-2,2-difluoro-5-oxo-5-phenylpent-3-enoate (4j)**

Colourless oil, 32% yield (23.3 mg), E/Z=3:1.

$^1\text{H NMR}$  (400 MHz, Chloroform-*d*)  $\delta$  7.98 – 7.96 (m, 2H), 7.63 – 7.59 (m, 1H), 7.52 – 7.48 (m, 2H), 7.38 – 7.34 (m, 4H), 6.53 (t,  $J = 11.2$  Hz, 1H), 4.09 (q,  $J = 7.2$  Hz, 2H), 1.27 (t,  $J = 7.2$  Hz, 3H).

$^{13}\text{C NMR}$  (100 MHz, Chloroform-*d*)  $\delta$  193.9, 162.3 (t,  $J = 33.2$  Hz), 145.7 (t,  $J = 7.7$  Hz), 136.1, 133.2, 132.6, 132.1 (t,  $J = 28.2$  Hz), 130.6, 130.2, 129.5, 129.1, 128.5, 128.5, 126.5, 111.5 (t,  $J = 248.8$  Hz), 63.4, 13.7.

$^{19}\text{F NMR}$  (376 MHz, Chloroform-*d*)  $\delta$  -98.5.

HRMS:  $m/z$  (ESI) calculated  $[\text{M}+\text{H}]^+$ : 365.0751, measured: 365.0752.

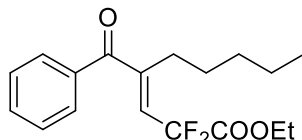

**ethyl (E)-4-benzoyl-2,2-difluoronon-3-enoate (4k)**

Yellow oil, 47% yield (30.5 mg), E/Z=13:1.

$^1\text{H NMR}$  (400 MHz, Chloroform-*d*)  $\delta$  7.83 – 7.81 (m, 1H), 7.62 – 7.58 (m, 0H), 7.50 – 7.46 (m, 1H), 5.98 (t,  $J = 13.2$  Hz, 0H), 4.36 (q,  $J = 7.2$  Hz, 1H), 2.68 – 2.64 (m, 1H), 1.44 – 1.41 (m, 1H), 1.37 (t,  $J = 7.2$  Hz, 2H), 1.33 – 1.28 (m, 2H), 0.86 (t,  $J = 7.2$  Hz, 1H).

$^{13}\text{C NMR}$  (100 MHz, Chloroform-*d*)  $\delta$  196.9, 163.4 (t,  $J = 34.0$  Hz), 150.7 (t,  $J = 6.1$  Hz), 136.3, 133.3, 129.8, 128.5, 126.8 (t,  $J = 27.2$  Hz), 112.3 (t,  $J = 248.3$  Hz), 63.3, 31.8, 28.8, 27.9, 22.2, 13.9, 13.8.

$^{19}\text{F NMR}$  (376 MHz, Chloroform-*d*)  $\delta$  -99.0.

HRMS:  $m/z$  (ESI) calculated  $[\text{M}+\text{NH}_4]^+$ : 342.1875, measured: 342.1874.

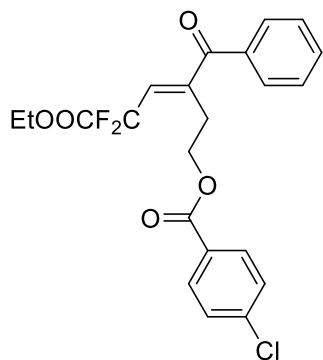

**(E)-3-benzoyl-6-ethoxy-5,5-difluoro-6-oxohex-3-en-1-yl 4-chlorobenzoate (4l)**

Brown oil, 40% yield (34.9 mg), E/Z>20:1.

$^1\text{H NMR}$  (400 MHz, Chloroform-*d*)  $\delta$  7.80 – 7.78 (m, 2H), 7.74 – 7.72 (m, 2H), 7.58 – 7.54 (m, 1H), 7.43 – 7.40 (m, 2H), 7.28 – 7.25 (m, 2H), 6.17 (t,  $J$  = 13.6 Hz, 1H), 4.48 (t,  $J$  = 6.0 Hz, 2H), 4.34 (q,  $J$  = 7.2 Hz, 2H), 3.24 – 3.21 (m, 2H), 1.35 (t,  $J$  = 7.2 Hz, 3H).

$^{13}\text{C NMR}$  (100 MHz, Chloroform-*d*)  $\delta$  196.0 , 165.2 , 163.0 (t,  $J$  = 33.7 Hz), 146.4 (t,  $J$  = 5.6 Hz), 139.3 , 135.7 , 133.4 , 130.8 , 129.9 , 129.3 (t,  $J$  = 27.0 Hz), 128.6 , 128.5 , 128.1 , 112.2 (t,  $J$  = 249.4 Hz), 63.6 , 63.4 , 28.1 , 13.8 .

$^{19}\text{F NMR}$  (376 MHz, Chloroform-*d*)  $\delta$  -99.15.

HRMS:  $m/z$  (ESI) calculated  $[\text{M}+\text{NH}_4]^+$ : 454.1227, measured: 454.1230.

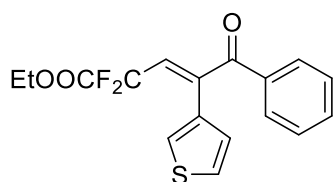

**ethyl (E)-2,2-difluoro-5-oxo-5-phenyl-4-(thiophen-3-yl)pent-3-enoate (4m)**

Yellow oil, 68% yield (45.7 mg), E/Z>20:1.

$^1\text{H NMR}$  (400 MHz, Chloroform-*d*)  $\delta$  7.93 – 7.91 (m, 2H), 7.61 – 7.57 (m, 1H), 7.51 – 7.45 (m, 3H), 7.31 – 7.29 (m, 1H), 7.12 – 7.11 (m, 1H), 6.16 (t,  $J$  = 11.4 Hz, 1H), 4.07 (q,  $J$  = 7.2 Hz, 2H), 1.19 (t,  $J$  = 7.2 Hz, 3H).

$^{13}\text{C NMR}$  (100 MHz, Chloroform-*d*)  $\delta$  194.4 , 162.6 (t,  $J$  = 33.3 Hz), 143.9 (t,  $J$  = 8.7 Hz), 135.5 , 133.8 , 132.7 , 130.1 , 128.7 , 127.9 , 127.3 , 126.0 , 125.4 (t,  $J$  = 29.1 Hz), 112.0 (t,  $J$  = 247.0 Hz), 63.2 , 13.6 .

$^{19}\text{F NMR}$  (376 MHz, Chloroform-*d*)  $\delta$  -93.0.

HRMS:  $m/z$  (ESI) calculated  $[\text{M}+\text{NH}_4]^+$ : 354.0970, measured: 354.0972.

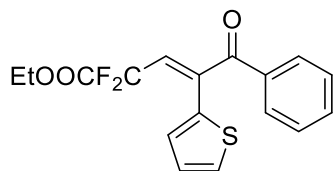

**ethyl (Z)-2,2-difluoro-5-oxo-5-phenyl-4-(thiophen-2-yl)pent-3-enoate (4n)**

Brown oil, 43% yield (28.9 mg), E/Z=6:1.

$^1\text{H NMR}$  (400 MHz, Chloroform-*d*)  $\delta$  7.97 – 7.95 (m, 2H), 7.64 – 7.60 (m, 1H), 7.51 – 7.44 (m, 3H), 7.30 – 7.29 (m, 1H), 7.05 – 7.02 (m, 1H), 6.17 (t,  $J$  = 11.4 Hz, 1H), 4.08 (q,  $J$  = 7.2 Hz, 2H), 1.19 (t,  $J$  = 7.2 Hz, 3H).

$^{13}\text{C NMR}$  (100 MHz, Chloroform-*d*)  $\delta$  194.1 , 162.4 (t,  $J$  = 33.0 Hz), 142.1 (t,  $J$  = 8.9 Hz), 135.1 , 134.0 , 132.9 , 131.0 , 130.3 , 129.9 , 128.7 , 127.1 , 125.5 (t,  $J$  = 29.5 Hz), 111.9 (t,  $J$  = 244.7 Hz), 63.3 , 13.7 .

$^{19}\text{F NMR}$  (376 MHz, Chloroform-*d*)  $\delta$  -91.8.

HRMS:  $m/z$  (ESI) calculated  $[M+NH_4]^+$ : 354.0970, measured: 354.0974.

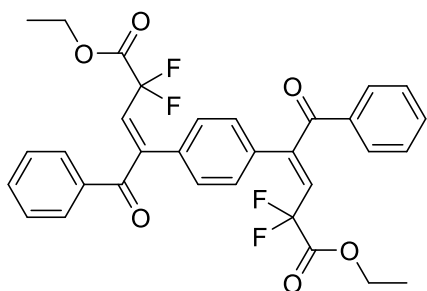

**diethyl 4,4'-(1,4-phenylene)(3E,3'E)-bis(2,2-difluoro-5-oxo-5-phenylpent-3-enoate) (4o)**

Brown oil, 29% yield (33.8 mg), E/Z>20:1.

$^1H$  NMR (400 MHz, Chloroform-*d*)  $\delta$  7.92 – 7.90 (m, 4H), 7.61 – 7.58 (m, 2H), 7.49 – 7.46 (m, 4H), 7.38 (s, 4H), 6.25 (t,  $J = 11.6$  Hz, 2H), 3.96 (q,  $J = 7.2$  Hz, 4H), 1.16 (t,  $J = 7.2$  Hz, 6H).

$^{13}C$  NMR (100 MHz, Chloroform-*d*)  $\delta$  194.3, 162.5 (t,  $J = 32.8$  Hz), 147.7 (t,  $J = 7.9$  Hz), 135.4, 133.9, 133.8, 130.1, 128.8, 128.7, 126.9 (t,  $J = 28.2$  Hz), 111.7 (t,  $J = 246.6$  Hz), 63.3, 13.6.

$^{19}F$  NMR (376 MHz, Chloroform-*d*)  $\delta$  -94.1.

HRMS:  $m/z$  (ESI) calculated  $[M+H]^+$ : 600.2004, measured: 600.1989.

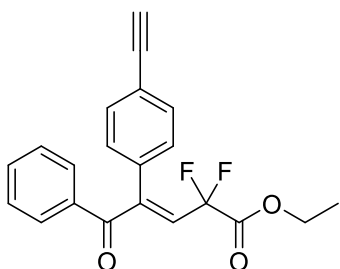

**ethyl (E)-4-(4-ethynylphenyl)-2,2-difluoro-5-oxo-5-phenylpent-3-enoate (4oo)**

Brown oil, 37% yield (26.2 mg), E/Z>20:1.

$^1H$  NMR (400 MHz, Chloroform-*d*)  $\delta$  7.93 – 7.90 (m, 2H), 7.61 – 7.58 (m, 1H), 7.49 – 7.48 (m, 4H), 7.33 (d,  $J = 8.0$  Hz, 2H), 6.27 (t,  $J = 11.6$  Hz, 1H), 4.05 (q,  $J = 7.2$  Hz, 2H), 3.12 (s, 1H), 1.21 (t,  $J = 7.2$  Hz, 3H).

$^{13}C$  NMR (100 MHz, Chloroform-*d*)  $\delta$  194.3, 162.6 (t,  $J = 33.1$  Hz), 147.8 (t,  $J = 8.0$  Hz), 135.4, 133.8, 133.4, 131.9, 130.1, 128.9, 128.7, 127.0 (t,  $J = 28.1$  Hz), 123.1, 111.7 (t,  $J = 247.0$  Hz), 82.9, 78.6, 63.3, 13.6.

$^{19}F$  NMR (376 MHz, Chloroform-*d*)  $\delta$  -94.2.

HRMS:  $m/z$  (ESI) calculated  $[M+H]^+$ : 355.1140, measured: 355.1131.

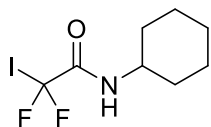

$^1H$  NMR (400 MHz, Chloroform-*d*)  $\delta$  6.16 (s, 1H), 3.82 – 3.75 (m, 1H), 1.99 – 1.95 (m, 2H), 1.79 – 1.74 (m, 3H), 1.68 – 1.63 (m, 2H), 1.45 – 1.34 (m, 3H), 1.30 – 1.19 (m, 5H).

$^{13}C$  NMR (100 MHz, Chloroform-*d*)  $\delta$  160.4 (t,  $J = 24.2$  Hz), 91.6 (t,  $J = 322.1$  Hz), 49.3, 32.2, 25.2, 24.6.

$^{19}F$  NMR (376 MHz, Chloroform-*d*)  $\delta$  -56.6.



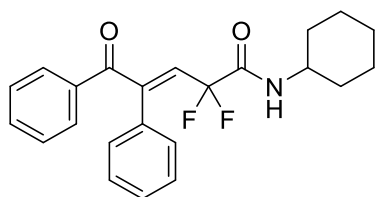

**(E)-N-cyclohexyl-2,2-difluoro-5-oxo-4,5-diphenylpent-3-enamide (4p)**

Brown oil, 42% yield (32.2 mg), E/Z=10:1.

$^1\text{H NMR}$  (400 MHz, Chloroform-*d*)  $\delta$  7.97 (d,  $J = 7.6$  Hz, 2H), 7.59 – 7.55 (m, 1H), 7.49 – 7.45 (m, 2H), 7.39 – 7.37 (m, 2H), 7.35 – 7.33 (m, 3H), 6.31 (t,  $J = 12.6$  Hz, 1H), 5.96 (s, 1H), 3.61 – 3.56 (m, 1H), 1.78 – 1.75 (m, 2H), 1.69 – 1.65 (m, 2H), 1.61 – 1.58 (m, 1H), 1.33 – 1.30 (m, 2H), 1.17 – 1.11 (m, 1H), 1.08 – 1.00 (m, 2H).

$^{13}\text{C NMR}$  (100 MHz, Chloroform-*d*)  $\delta$  194.8 , 162.2 (t,  $J = 28.6$  Hz), 148.2 (t,  $J = 7.2$  Hz), 135.6 , 133.5 , 130.2 , 128.8 , 128.7 , 128.6 , 128.1 , 127.3 (t,  $J = 27.1$  Hz), 121.2 , 113.4 (t,  $J = 250.8$  Hz), 48.6 , 32.3 , 25.2 , 24.5 .

$^{19}\text{F NMR}$  (376 MHz, Chloroform-*d*)  $\delta$  -95.5.

HRMS:  $m/z$  (ESI) calculated  $[\text{M}+\text{NH}_4]^+$ : 401.2035, measured: 401.2034.

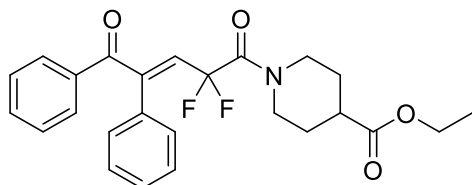

**ethyl (E)-1-(2,2-difluoro-5-oxo-4,5-diphenylpent-3-enoyl)piperidine-4-carboxylate (4q)**

Brown oil, 50% yield (33.8 mg), E/Z>20:1.

$^1\text{H NMR}$  (400 MHz, Chloroform-*d*)  $\delta$  7.97 – 7.95 (m, 2H), 7.57 – 7.53 (m, 1H), 7.47 – 7.40 (m, 4H), 7.35 – 7.33 (m, 3H), 6.32 (t,  $J = 12.0$  Hz, 1H), 4.14 (q,  $J = 7.2$  Hz, 2H), 4.05 (d,  $J = 13.6$  Hz, 1H), 3.91 (d,  $J = 14.0$  Hz, 1H), 3.12 – 3.05 (m, 1H), 2.76 – 2.70 (m, 1H), 2.54 – 2.46 (m, 1H), 1.91 – 1.81 (m, 2H), 1.73 – 1.67 (m, 1H), 1.58 – 1.48 (m, 1H), 1.25 (t,  $J = 7.2$  Hz, 3H).

$^{13}\text{C NMR}$  (100 MHz, Chloroform-*d*)  $\delta$  194.9 , 173.7 , 160.6 (t,  $J = 29.1$  Hz), 147.3 (t,  $J = 7.6$  Hz), 135.4 , 133.6 , 132.9 , 130.2 , 129.0 , 128.7 , 128.6 , 128.1 , 126.6 (t,  $J = 27.2$  Hz), 114.4 (t,  $J = 248.4$  Hz), 60.6 , 45.1 , 42.3 , 40.6 , 28.0 , 27.4 , 14.1 .

$^{19}\text{F NMR}$  (376 MHz, Chloroform-*d*)  $\delta$  -89.6 (d,  $J = 22.6$  Hz).

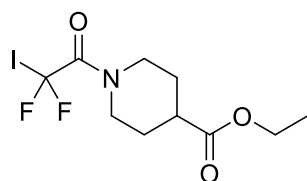

**ethyl 1-(2,2-difluoro-2-iodoacetyl)piperidine-4-carboxylate**

$^1\text{H NMR}$  (400 MHz, Chloroform-*d*)  $\delta$  4.27 (d,  $J = 13.2$  Hz, 1H), 4.16 (q,  $J = 7.2$  Hz, 2H), 4.10 (d,  $J = 16.0$  Hz, 1H), 3.30 – 3.23 (m, 1H), 3.11 – 3.04 (m, 1H), 2.67 – 2.60 (m, 1H), 2.03 – 2.00 (m, 2H), 1.90 – 1.70 (m, 2H), 1.27 (t,  $J = 7.2$  Hz, 3H).

$^{13}\text{C NMR}$  (100 MHz, Chloroform-*d*)  $\delta$  173.3, 158.2 (t,  $J = 23.5$  Hz), 89.4 (t,  $J = 319.7$  Hz), 60.5 , 45.9 , 42.9 , 40.0 , 27.3 , 27.2 , 13.9 .

$^{19}\text{F NMR}$  (376 MHz, Chloroform-*d*)  $\delta$  -50.39 (d,  $J = 14.3$  Hz).

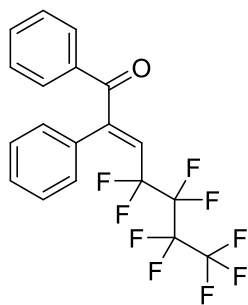

**(E)-4,4,5,5,6,6,7,7,7-nonafluoro-1,2-diphenylhept-2-en-1-one (5a)**

Brown oil, 63% yield (53.7 mg), E/Z=8:1.

$^1\text{H NMR}$  (400 MHz, Chloroform-*d*)  $\delta$  7.95 – 7.92 (m, 2H), 7.62 – 7.56 (m, 1H), 7.50 – 7.44 (m, 2H), 7.40 – 7.36 (m, 5H), 6.05 (t,  $J = 14.4$  Hz, 1H).

$^{13}\text{C NMR}$  (100 MHz, Chloroform-*d*)  $\delta$  194.1, 152.4 (t,  $J = 4.6$  Hz), 134.9, 134.0, 132.8, 130.1, 129.5, 129.1, 128.8, 128.2, 118.8 (t,  $J = 21.9$  Hz).

$^{19}\text{F NMR}$  (376 MHz, Chloroform-*d*)  $\delta$  -80.99 – -81.05 (m), -105.78 – -107.88 (m), -123.61 – -123.68 (m), -125.69 – -125.77 (m).

HRMS:  $m/z$  (ESI) calculated  $[\text{M}+\text{H}]^+$ : 427.0739, measured: 427.0740.

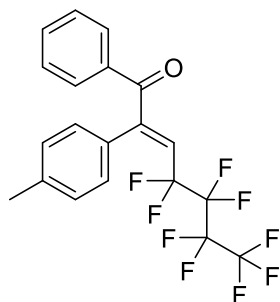

**(E)-4,4,5,5,6,6,7,7,7-nonafluoro-1-phenyl-2-(p-tolyl)hept-2-en-1-one (5b)**

Brown oil, 47% yield (41.4 mg), E/Z=9:1.

$^1\text{H NMR}$  (400 MHz, Chloroform-*d*)  $\delta$  7.93 – 7.91 (m, 2H), 7.60 – 7.57 (m, 1H), 7.49 – 7.45 (m, 2H), 7.28 (d,  $J = 8.0$  Hz, 2H), 7.17 (d,  $J = 8.0$  Hz, 2H), 6.00 (t,  $J = 14.4$  Hz, 1H), 2.34 (s, 3H).

$^{13}\text{C NMR}$  (100 MHz, Chloroform-*d*)  $\delta$  194.3, 152.6 (t,  $J = 4.5$  Hz), 139.2, 135.0, 133.9, 130.1, 129.9, 129.0, 128.8, 128.2, 118.2 (t,  $J = 21.7$  Hz), 21.3.

$^{19}\text{F NMR}$  (376 MHz, Chloroform-*d*)  $\delta$  -80.99 – -81.04 (m), -105.62 – -105.69 (m), -123.62 – -123.69 (m), -125.65 – -125.73 (m).

HRMS:  $m/z$  (ESI) calculated  $[\text{M}+\text{H}]^+$ : 441.0895, measured: 441.0893.

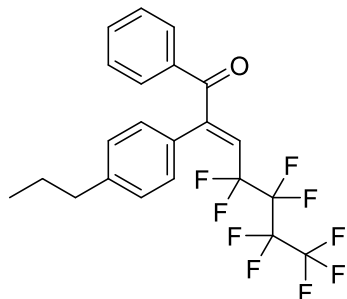

**(E)-4,4,5,5,6,6,7,7,7-nonafluoro-1-phenyl-2-(4-propylphenyl)hept-2-en-1-one (5c)**

Yellow oil, 61% yield (57.1 mg), E/Z=6:1.

$^1\text{H NMR}$  (400 MHz, Chloroform-*d*)  $\delta$  7.94 – 7.91 (m, 2H), 7.60 – 7.56 (m, 1H), 7.48 – 7.45 (m, 2H), 7.31 (d,  $J$  = 8.0 Hz, 2H), 7.17 (d,  $J$  = 8.0 Hz, 2H), 5.99 (t,  $J$  = 14.4 Hz, 1H), 2.57 (t,  $J$  = 7.2 Hz, 2H), 1.65 – 1.58 (m, 2H), 0.92 (t,  $J$  = 7.2 Hz, 3H).

$^{13}\text{C NMR}$  (100 MHz, Chloroform-*d*)  $\delta$  194.3 , 152.7 (t,  $J$  = 4.0 Hz), 143.9 , 135.0 , 133.9 , 130.1 , 128.8 , 128.3 , 128.2 , 126.6 , 118.0 (t,  $J$  = 21.6 Hz), 37.8 , 24.2 , 13.7

$^{19}\text{F NMR}$  (376 MHz, Chloroform-*d*)  $\delta$  -81.01 – -81.06 (m), -105.61 – -105.67 (m), -123.64 – -123.71 (m), -125.66 – -125.74 (m).

HRMS:  $m/z$  (ESI) calculated  $[\text{M}+\text{NH}_4]^+$ : 469.1208, measured: 469.1193.

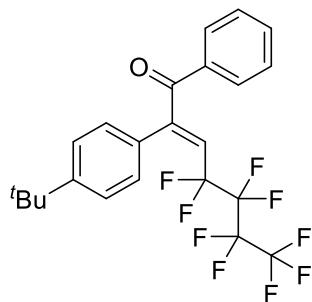

**(E)-2-(4-(tert-butyl)phenyl)-4,4,5,5,6,6,7,7,7-nonafluoro-1-phenylhept-2-en-1-one (5d)**

Yellow oil, 70% yield (67.5 mg), E/Z>20:1.

$^1\text{H NMR}$  (400 MHz, Chloroform-*d*)  $\delta$  7.95 – 7.93 (m, 2H), 7.60 – 7.56 (m, 1H), 7.48 – 7.44 (m, 2H), 7.39 – 7.33 (m, 4H), 5.98 (t,  $J$  = 14.0 Hz, 1H), 1.30 (s, 9H).

$^{13}\text{C NMR}$  (100 MHz, Chloroform-*d*)  $\delta$  194.3 , 152.7 (t,  $J$  = 4.3 Hz), 152.3 , 135.0 , 134.0 , 130.1 , 129.7 , 128.8 , 128.0 , 125.2 , 117.8 (t,  $J$  = 21.9 Hz), 34.7 , 31.1 .

$^{19}\text{F NMR}$  (376 MHz, Chloroform-*d*)  $\delta$  -81.03 – -81.08 (m), -105.58 – -105.67 (m), -123.66 – -123.74 (m), -125.63 – -125.75 (m).

HRMS:  $m/z$  (ESI) calculated  $[\text{M}+\text{H}]^+$ : 483.1365, measured: 483.1363.

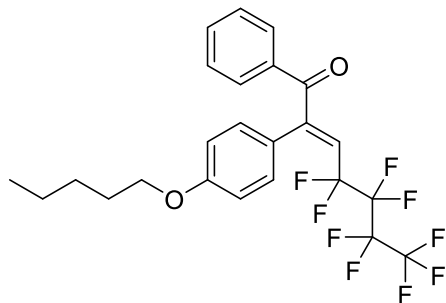

**(E)-4,4,5,5,6,6,7,7,7-nonafluoro-2-(4-(pentyloxy)phenyl)-1-phenylhept-2-en-1-one (5e)**

Yellow oil, 69% yield (70.7 mg), E/Z=7:1.

$^1\text{H NMR}$  (400 MHz, Chloroform-*d*)  $\delta$  7.92 – 7.90 (m, 2H), 7.59 – 7.55 (m, 1H), 7.47 – 7.43 (m, 2H), 7.32 (d,  $J$  = 8.4 Hz, 2H), 6.88 – 6.86 (m, 2H), 5.96 (t,  $J$  = 14.4 Hz, 1H), 3.93 (t,  $J$  = 6.8 Hz, 2H), 1.80 – 1.73 (m, 2H), 1.44 – 1.34 (m, 4H), 0.92 (t,  $J$  = 7.2 Hz, 3H).

$^{13}\text{C NMR}$  (100 MHz, Chloroform-*d*)  $\delta$  194.5 , 160.0 , 152.5 (t,  $J$  = 4.4 Hz), 135.1 , 133.9 , 130.1 , 129.9 , 128.7 , 124.7 , 117.3 (t,  $J$  = 21.5 Hz), 114.3 , 68.0 , 28.9 , 28.2 , 22.4 , 13.9 .

$^{19}\text{F NMR}$  (376 MHz, Chloroform-*d*)  $\delta$  -81.03 – -81.09 (m), -105.37 – -105.39 (m), -123.66 – -123.74 (m), -125.65 – -125.74 (m).

HRMS:  $m/z$  (ESI) calculated  $[\text{M}+\text{NH}_4]^+$ : 530.1736, measured: 530.1732.

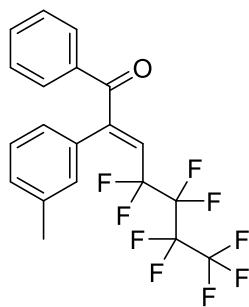

**(E)-4,4,5,5,6,6,7,7,7-nonafluoro-1-phenyl-2-(m-tolyl)hept-2-en-1-one (5f)**

Yellow oil, 49% yield (43.2 mg), E/Z>20:1.

$^1\text{H NMR}$  (400 MHz, Chloroform-*d*)  $\delta$  7.94 (d,  $J = 7.2$  Hz, 2H), 7.62 – 7.58 (m, 1H), 7.50 – 7.47 (m, 2H), 7.24 (s, 1H), 7.20 – 7.16 (m, 3H), 6.00 (t,  $J = 14.2$  Hz, 1H), 2.34 (s, 3H).

$^1\text{H NMR}$  (400 MHz, Chloroform-*d*)  $\delta$  7.94 (d,  $J = 7.5$  Hz, 1H), 7.63 – 7.58 (m, 1H), 7.51 – 7.46 (m, 1H), 7.25 (s, 1H), 7.21 – 7.16 (m, 2H), 6.00 (t,  $J = 14.2$  Hz, 0H), 2.34 (s, 1H).

$^{13}\text{C NMR}$  (100 MHz, Chloroform-*d*)  $\delta$  194.2, 152.6 (t,  $J = 4.3$  Hz), 137.9, 135.0, 134.0, 132.7, 130.1, 129.9, 128.8, 128.1, 125.4, 118.4 (t,  $J = 22.0$  Hz), 29.7, 21.4.

$^{19}\text{F NMR}$  (376 MHz, Chloroform-*d*)  $\delta$  -80.98 – -81.03 (m), -105.76 – -105.83 (m), -123.60 – -123.67 (m), -125.66 – -125.73 (m).

HRMS:  $m/z$  (ESI) calculated  $[\text{M}+\text{NH}_4]^+$ : 458.1161, measured: 458.1160.

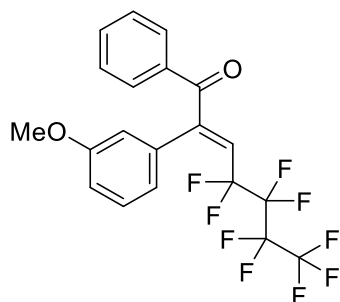

**(E)-4,4,5,5,6,6,7,7,7-nonafluoro-2-(3-methoxyphenyl)-1-phenylhept-2-en-1-one (5g)**

Brown oil, 33% yield (30.1 mg), E/Z>20:1.

$^1\text{H NMR}$  (400 MHz, Chloroform-*d*)  $\delta$  7.93 (d,  $J = 7.6$  Hz, 2H), 7.60 (t,  $J = 7.2$  Hz, 1H), 7.48 (t,  $J = 7.6$  Hz, 2H), 7.28 (t,  $J = 8.0$  Hz, 1H), 6.98 – 6.89 (m, 3H), 6.03 (t,  $J = 14.0$  Hz, 1H), 3.79 (s, 3H).

$^{13}\text{C NMR}$  (100 MHz, Chloroform-*d*)  $\delta$  193.9, 159.3, 152.3 (t,  $J = 4.0$  Hz), 134.9, 134.0, 133.9, 130.1, 129.3, 128.8, 120.6, 118.7 (t,  $J = 22.1$  Hz), 114.7, 113.9, 55.3.

$^{19}\text{F NMR}$  (376 MHz, Chloroform-*d*)  $\delta$  -80.97 – -81.03 (m), -105.87 – -105.96 (m), -123.57 – -123.65 (m), -125.65 – -125.73 (m).

HRMS:  $m/z$  (ESI) calculated  $[\text{M}+\text{NH}_4]^+$ : 474.1110, measured: 474.1107.

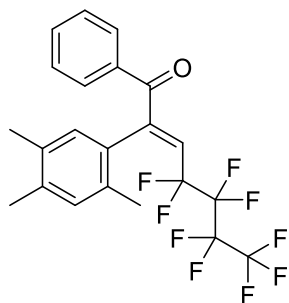

**(E)-4,4,5,5,6,6,7,7,7-nonafluoro-1-phenyl-2-(2,4,5-trimethylphenyl)hept-2-en-1-one (5h)**

Yellow oil, 47% yield (44.0 mg), E/Z=7:1.

$^1\text{H}$  NMR (400 MHz, Chloroform-*d*)  $\delta$  7.92 – 7.89 (m, 2H), 7.60 (t,  $J = 7.2$  Hz, 1H), 7.49 (t,  $J = 7.2$  Hz, 2H), 6.96 (d,  $J = 3.6$  Hz, 2H), 6.25 (t,  $J = 14.0$  Hz, 1H), 2.22 (s, 6H), 2.21 (s, 3H).

$^{13}\text{C}$  NMR (100 MHz, Chloroform-*d*)  $\delta$  194.3 , 151.6 (t,  $J = 4.6$  Hz), 137.3 , 135.7 , 133.5 , 133.4 , 132.7 , 131.4 , 130.3 , 130.0 , 129.9 , 128.7 , 122.8 (t,  $J = 21.1$  Hz), 19.5 , 19.5 , 19.2 .

$^{19}\text{F}$  NMR (376 MHz, Chloroform-*d*)  $\delta$  -80.98 – -81.04 (m), -108.22, -123.71 – -123.78 (m), -125.65 – -125.73 (m).

HRMS:  $m/z$  (ESI) calculated  $[\text{M}+\text{H}]^+$ : 469.1208, measured: 469.1204.

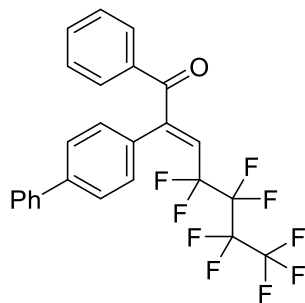

**(E)-2-([1,1'-biphenyl]-4-yl)-4,4,5,5,6,6,7,7,7-nonafluoro-1-phenylhept-2-en-1-one (5i)**

Yellow oil, 65% yield (65.3 mg), E/Z>20:1.

$^1\text{H}$  NMR (400 MHz, Chloroform-*d*)  $\delta$  7.97 – 7.95 (m, 2H), 7.60 – 7.56 (m, 5H), 7.49 – 7.45 (m, 4H), 7.43 – 7.39 (m, 2H), 7.34 – 7.31 (m, 1H), 6.07 (t,  $J = 14.0$  Hz, 1H).

$^{13}\text{C}$  NMR (100 MHz, Chloroform-*d*)  $\delta$  194.1 , 152.2 (t,  $J = 4.6$  Hz), 142.0 , 140.1 , 134.93 134.0 , 131.7 , 130.1 , 128.8 , 128.8 , 128.8 , 128.7 , 127.7 , 127.1 , 126.9 , 118.7 (t,  $J = 22.1$  Hz).

$^{19}\text{F}$  NMR (376 MHz, Chloroform-*d*)  $\delta$  -80.97 – -81.02 (m), -105.57 – -105.67 (m), -123.53 – -123.60 (m), -125.60 – -125.68 (m).

HRMS:  $m/z$  (ESI) calculated  $[\text{M}+\text{NH}_4]^+$ : 520.1317, measured: 520.1315.

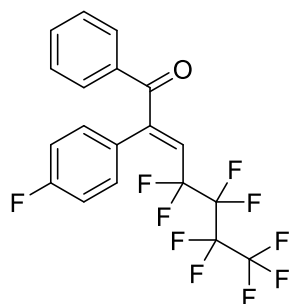

**(E)-4,4,5,5,6,6,7,7,7-nonafluoro-2-(4-fluorophenyl)-1-phenylhept-2-en-1-one (5j)**

Brown oil, 47% yield (41.7 mg), E/Z>20:1.

$^1\text{H}$  NMR (400 MHz, Chloroform-*d*)  $\delta$  7.93 – 7.90 (m, 2H), 7.63 – 7.59 (m, 1H), 7.51 – 7.47 (m, 3H), 7.40 – 7.37 (m, 3H), 7.08 – 7.04 (m, 2H), 6.07 (t,  $J = 14.0$  Hz, 1H).

$^{13}\text{C}$  NMR (100 MHz, Chloroform-*d*)  $\delta$  193.9, 164.4 , 161.9 , 151.3 , 134.8 , 134.1 , 130.3 (d,  $J = 8.3$  Hz), 129.5 (d,  $J = 115.4$  Hz), 128.8 (d,  $J = 3.5$  Hz), 119.5 (t,  $J = 21.9$  Hz), 115.4 (d,  $J = 21.8$  Hz).

$^{19}\text{F}$  NMR (376 MHz, Chloroform-*d*)  $\delta$  -81.05 – -81.10 (m), -105.82 – -105.91 (m), -111.82, -123.63 – -123.70 (m), -125.71 – -125.79 (m).

HRMS:  $m/z$  (ESI) calculated  $[\text{M}+\text{H}]^+$ : 445.0645, measured: 445.0630.

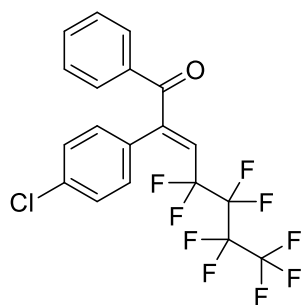

**(E)-2-(4-chlorophenyl)-4,4,5,5,6,6,7,7,7-nonafluoro-1-phenylhept-2-en-1-one (5k)**

Yellow oil, 57% yield (52.4 mg), E/Z>20:1.

$^1\text{H NMR}$  (400 MHz, Chloroform-*d*)  $\delta$  7.91 (d,  $J = 7.6$  Hz, 2H), 7.62 (t,  $J = 7.6$  Hz, 1H), 7.49 (t,  $J = 7.6$  Hz, 2H), 7.35 (s, 4H), 6.08 (t,  $J = 14.0$  Hz, 1H).

$^{13}\text{C NMR}$  (100 MHz, Chloroform-*d*)  $\delta$  193.7, 151.1, 135.4, 134.7, 134.2, 131.2, 130.0, 129.6, 128.9, 128.5, 119.8 (t,  $J = 22.3$  Hz).

$^{19}\text{F NMR}$  (376 MHz, Chloroform-*d*)  $\delta$  -81.01 – -81.06 (m), -105.87 – -105.98 (m), -123.59 – -124.67 (m), -125.70 – -125.79 (m).

HRMS:  $m/z$  (ESI) calculated  $[\text{M}+\text{H}]^+$ : 461.0349, measured: 461.0335.

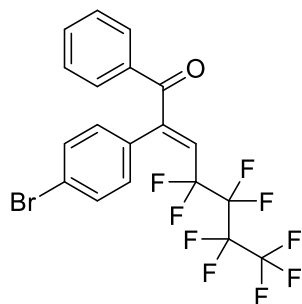

**(E)-2-(4-bromophenyl)-4,4,5,5,6,6,7,7,7-nonafluoro-1-phenylhept-2-en-1-one (5l)**

Brown oil, 52% yield (52.4 mg), E/Z=8:1.

$^1\text{H NMR}$  (400 MHz, Chloroform-*d*)  $\delta$  7.91 – 7.89 (m, 2H), 7.64 – 7.60 (m, 1H), 7.52 – 7.50 (m, 4H), 7.27 (d,  $J = 8.8$  Hz, 2H), 6.08 (t,  $J = 14.4$  Hz, 1H).

$^{13}\text{C NMR}$  (100 MHz, Chloroform-*d*)  $\delta$  193.6, 151.1 (t,  $J = 4.2$  Hz), 134.7, 134.2, 132.6, 131.7, 131.5, 129.8, 128.9, 123.6, 119.8 (t,  $J = 22.1$  Hz).

$^{19}\text{F NMR}$  (376 MHz, Chloroform-*d*)  $\delta$  -80.98 – -81.04 (m), -105.85 – -105.95 (m), -123.56 – -123.64 (m), -125.66 – -125.74 (m).

HRMS:  $m/z$  (ESI) calculated  $[\text{M}+\text{H}]^+$ :506.9824, measured: 506.9809.

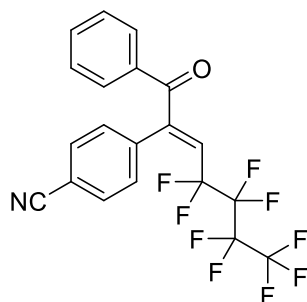

**(E)-4-(4,4,5,5,6,6,7,7,7-nonafluoro-1-oxo-1-phenylhept-2-en-2-yl)benzonitrile (5m)**

Yellow oil, 33% yield (29.8 mg), E/Z>20:1.

$^1\text{H NMR}$  (400 MHz, Chloroform-*d*)  $\delta$  7.93 – 7.91 (m, 3H), 7.70 – 7.65 (m, 3H), 7.55 – 7.50 (m, 5H), 6.17 (t,  $J$  = 13.6 Hz, 1H).

$^{13}\text{C NMR}$  (100 MHz, Chloroform-*d*)  $\delta$  192.9 , 150.0 (t,  $J$  = 4.6 Hz), 137.5 , 134.5 , 133.0 , 131.9 , 130.0 , 129.1 , 129.0 , 121.3 (t,  $J$  = 22.5 Hz), 118.1 , 113.1 .

$^{19}\text{F NMR}$  (376 MHz, Chloroform-*d*)  $\delta$  -80.94 – -80.99 (m), -106.18 – -106.24 (m), -123.49 – -123.56 (m), -125.68 – -125.76(m).

HRMS:  $m/z$  (ESI) calculated  $[\text{M}+\text{NH}_4]^+$ : 469.0954, measured: 469.0959.

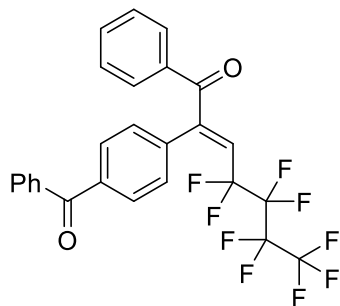

**(E)-2-(4-benzoylphenyl)-4,4,5,5,6,6,7,7,7-nonafluoro-1-phenylhept-2-en-1-one (5n)**

Brown oil, 39% yield (41.3 mg), E/Z=8:1.

$^1\text{H NMR}$  (400 MHz, Chloroform-*d*)  $\delta$  7.97 – 7.95 (m, 2H), 7.84 – 7.78 (m, 4H), 7.66 – 7.62 (m, 1H), 7.61 – 7.57 (m, 2H), 7.54 – 7.48 (m, 5H), 6.15 (t,  $J$  = 14.0 Hz, 1H).

$^{13}\text{C NMR}$  (100 MHz, Chloroform-*d*)  $\delta$  195.9 , 193.4 , 151.2 , 137.9 , 137.2 , 136.8 , 134.7 , 134.3 , 132.6 , 130.1 , 130.0 , 129.8 , 129.0 , 128.3 , 128.2 , 126.7 , 120.2 (t,  $J$  = 22.3 Hz).

$^{19}\text{F NMR}$  (376 MHz, Chloroform-*d*)  $\delta$  -80.95 – -81.00 (m), -105.96 – -106.06 (m), -123.51 – -123.59(m), -125.66 – -125.75 (m).

HRMS:  $m/z$  (ESI) calculated  $[\text{M}+\text{H}]^+$ : 531.1001, measured: 531.0999.

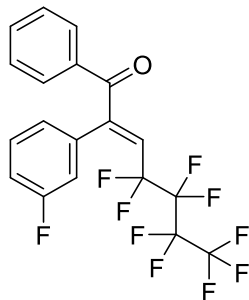

**(E)-4,4,5,5,6,6,7,7,7-nonafluoro-2-(3-fluorophenyl)-1-phenylhept-2-en-1-one (5o)**

Brown oil, 51% yield (45.3 mg), E/Z>20:1.

$^1\text{H NMR}$  (400 MHz, Chloroform-*d*)  $\delta$  7.93 – 7.91 (m, 2H), 7.65 – 7.61 (m, 1H), 7.52 – 7.49 (m, 2H), 7.37 – 7.32 (m, 1H), 7.17 (d,  $J$  = 8.0 Hz, 1H), 7.13 (d,  $J$  = 9.2 Hz, 1H), 7.09 – 7.04 (m, 1H), 6.08 (t,  $J$  = 14.0 Hz, 1H).

$^{13}\text{C NMR}$  (100 MHz, Chloroform-*d*)  $\delta$  193.5, 163.5 , 161.0 , 150.9 , 134.7 , 134.7 (d,  $J$  = 8.5 Hz), 134.2 , 129.9 (d,  $J$  = 8.2 Hz), 129.5 (d,  $J$  = 110.9 Hz), 124.1 (d,  $J$  = 3.2 Hz), 119.9 (t,  $J$  = 22.2 Hz), 116.1 (d,  $J$  = 20.9 Hz), 115.5 (d,  $J$  = 23.0 Hz).

$^{19}\text{F NMR}$  (376 MHz, Chloroform-*d*)  $\delta$  -81.00 – -81.05 (m), -106.05 – -106.14 (m), -112.44, -123.58 – -123.66 (m), -125.68 – -125.76 (m).

HRMS:  $m/z$  (ESI) calculated  $[\text{M}+\text{H}]^+$ :445.0645, measured:445.0628.

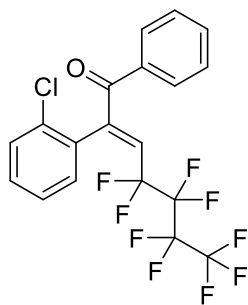

**(E)-2-(2-chlorophenyl)-4,4,5,5,6,6,7,7,7-nonafluoro-1-phenylhept-2-en-1-one (5p)**

Yellow oil, 35% yield (32.2 mg), E/Z>20:1.

$^1\text{H NMR}$  (400 MHz, Chloroform-*d*)  $\delta$  7.98 – 7.96 (m, 2H), 7.64 – 7.60 (m, 1H), 7.53 – 7.49 (m, 3H), 7.40 – 7.33 (m, 4H), 6.37 (t,  $J = 13.6$  Hz, 1H).

$^{13}\text{C NMR}$  (100 MHz, Chloroform-*d*)  $\delta$  193.4, 148.7 (t,  $J = 3.8$  Hz), 135.7, 133.5, 132.7, 131.6, 130.4, 130.2, 129.2, 128.7, 128.3, 126.3, 125.0 (t,  $J = 21.9$  Hz).

$^{19}\text{F NMR}$  (376 MHz, Chloroform-*d*)  $\delta$  -80.98 – -81.03 (m), -107.32 – -108.93 (m), -123.65, -125.70 – -125.77 (m).

HRMS:  $m/z$  (ESI) calculated  $[\text{M}+\text{NH}_4]^+$ : 478.0615, measured: 478.0611.

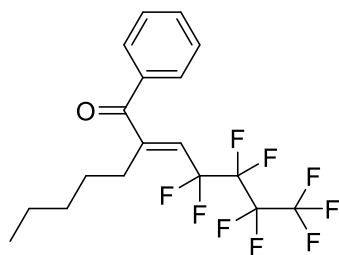

**(E)-4,4,5,5,6,6,7,7,7-nonafluoro-2-pentyl-1-phenylhept-2-en-1-one (5q)**

Brown oil, 29% yield (24.4 mg), E/Z>20:1.

$^1\text{H NMR}$  (400 MHz, Chloroform-*d*)  $\delta$  7.83 – 7.81 (m, 2H), 7.64 – 7.60 (m, 1H), 7.52 – 7.48 (m, 2H), 5.80 (t,  $J = 14.8$  Hz, 1H), 2.73 – 2.67 (m, 2H), 1.47 – 1.41 (m, 2H), 1.35 – 1.28 (m, 4H), 0.86 (t,  $J = 7.2$  Hz, 3H).

$^{13}\text{C NMR}$  (100 MHz, Chloroform-*d*)  $\delta$  196.5, 154.4 (t,  $J = 3.9$  Hz), 135.8, 133.7, 129.8, 128.7, 120.2 (t,  $J = 23.8$  Hz), 31.8, 29.3, 28.0, 22.2, 13.8.

$^{19}\text{F NMR}$  (376 MHz, Chloroform-*d*)  $\delta$  -80.98 – -81.03 (m), -107.08 – -107.18 (m), -124.00 – -124.08 (m), -125.68 – -125.76 (m).

HRMS:  $m/z$  (ESI) calculated  $[\text{M}+\text{NH}_4]^+$ : 421.1208, measured: 421.1194.

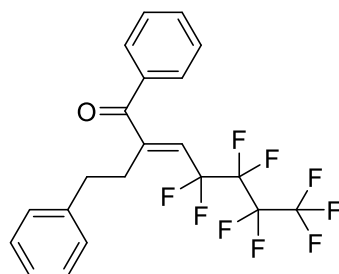

**(E)-4,4,5,5,6,6,7,7,7-nonafluoro-2-phenethyl-1-phenylhept-2-en-1-one (5r)**

Yellow oil, 27% yield (24.5 mg), E/Z>20:1.

$^1\text{H NMR}$  (400 MHz, Chloroform-*d*)  $\delta$  7.75 – 7.73 (m, 2H), 7.63 – 7.60 (m, 1H), 7.50 – 7.46 (m, 2H), 7.26 – 7.24 (m, 2H), 7.18 – 7.15 (m, 3H), 5.88 (t,  $J = 15.2$  Hz, 1H), 3.06 – 3.02 (m, 2H), 2.81 – 2.77 (m, 2H).



$^{13}\text{C}$  NMR (100 MHz, Chloroform-*d*)  $\delta$  196.2 , 153.0 (t,  $J = 4.2$  Hz), 140.2 , 135.7 , 133.7 , 129.8 , 128.7 , 128.5 , 128.4 , 126.4 , 121.6 (t,  $J = 23.6$  Hz), 34.5 , 31.1 .

$^{19}\text{F}$  NMR (376 MHz, Chloroform-*d*)  $\delta$  -80.94 – -80.99 (m), -107.35 – -107.46 (m), -123.93 – -124.00 (m), -125.64 – -125.71 (m).

HRMS:  $m/z$  (ESI) calculated  $[\text{M}+\text{H}]^+$ : 455.1052, measured: 455.1049.

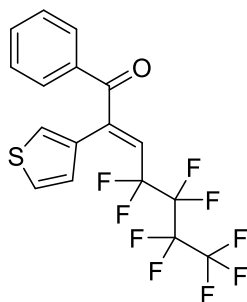

**(E)-4,4,5,5,6,6,7,7,7-nonafluoro-1-phenyl-2-(thiophen-3-yl)hept-2-en-1-one (5s)**

Yellow oil, 35% yield (30.2 mg), E/Z=7:1.

$^1\text{H}$  NMR (400 MHz, Chloroform-*d*)  $\delta$  7.91 – 7.89 (m, 2H), 7.62 – 7.58 (m, 1H), 7.49 – 7.45 (m, 3H), 7.33 – 7.31 (m, 1H), 7.18 (d,  $J = 4.0$  Hz, 1H), 5.94 (t,  $J = 14.8$  Hz, 1H).

$^{13}\text{C}$  NMR (100 MHz, Chloroform-*d*)  $\delta$  193.8, 147.7 (t,  $J = 4.4$  Hz), 134.8 , 134.1 , 132.1 , 130.1 , 128.8 , 127.9 , 126.9 , 125.9 , 117.1 (t,  $J = 22.4$  Hz).

$^{19}\text{F}$  NMR (376 MHz, Chloroform-*d*)  $\delta$  -80.97 – -81.03 (m), -105.93 – -106.03 (m), -123.68 – -123.76 (m), -125.62 – -125.71 (m).

HRMS:  $m/z$  (ESI) calculated  $[\text{M}+\text{NH}_4]^+$ : 450.0569, measured: 450.0567.

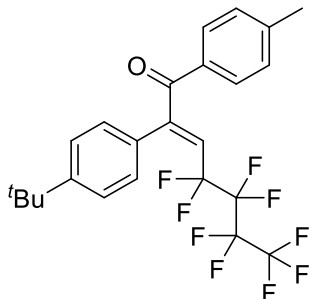

**(E)-2-(4-(tert-butyl)phenyl)-4,4,5,5,6,6,7,7,7-nonafluoro-1-(p-tolyl)hept-2-en-1-one (6a)**

Brown oil, 60% yield (59.8 mg), E/Z=11:1.

$^1\text{H}$  NMR (400 MHz, Chloroform-*d*)  $\delta$  7.85 (d,  $J = 8.0$  Hz, 2H), 7.38 – 7.32 (m, 4H), 7.27 (d,  $J = 8.0$  Hz, 2H), 5.94 (t,  $J = 14.3$  Hz, 1H), 2.40 (s, 3H), 1.29 (s, 9H).

$^{13}\text{C}$  NMR (100 MHz, Chloroform-*d*)  $\delta$  194.0 , 152.9 (t,  $J = 4.0$  Hz), 152.2 , 145.2 , 132.4 , 130.3 , 129.9 , 129.5 , 128.0 , 125.1 , 117.2 (t,  $J = 22.0$  Hz), 34.6 , 31.1 , 21.7 .

$^{19}\text{F}$  NMR (376 MHz, Chloroform-*d*)  $\delta$  -81.02 – -81.08 (m), -105.53 – -105.62 (m), -123.68 – -123.76 (m), -125.64 – -125.72 (m).

HRMS:  $m/z$  (ESI) calculated  $[\text{M}+\text{H}]^+$ : 497.1521, measured: 497.1519.

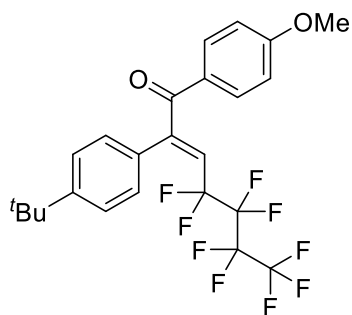

**(E)-2-(4-(tert-butyl)phenyl)-4,4,5,5,6,6,7,7,7-nonafluoro-1-(4-methoxyphenyl)hept-2-en-1-one (6b)**

Brown oil, 65% yield (66.6 mg), E/Z>20:1.

$^1\text{H NMR}$  (400 MHz, Chloroform-*d*)  $\delta$  7.94 (d,  $J$  = 8.8 Hz, 2H), 7.36 (d,  $J$  = 3.6 Hz, 4H), 6.94 (d,  $J$  = 8.8 Hz, 2H), 5.92 (t,  $J$  = 14.4 Hz, 1H), 3.85 (s, 3H), 1.29 (s, 9H).

$^{13}\text{C NMR}$  (100 MHz, Chloroform-*d*)  $\delta$  192.9, 164.4, 153.0 (t,  $J$  = 4.2 Hz), 152.2, 132.6, 130.0, 127.9, 127.7, 125.2, 116.6 (t,  $J$  = 21.6 Hz), 114.1, 55.5, 34.6, 31.1.

$^{19}\text{F NMR}$  (376 MHz, Chloroform-*d*)  $\delta$  -81.02 – -81.07 (m), -105.44 – -105.54 (m), -123.67 – -123.74 (m), -125.64 – -125.72 (m).

HRMS:  $m/z$  (ESI) calculated  $[\text{M}+\text{H}]^+$ : 513.1471, measured: 513.1469.

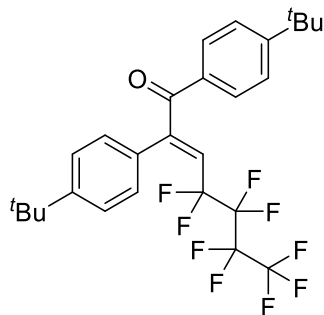

**(E)-1,2-bis(4-(tert-butyl)phenyl)-4,4,5,5,6,6,7,7,7-nonafluorohept-2-en-1-one (6c)**

Yellow oil, 49% yield (52.7 mg), E/Z>20:1.

$^1\text{H NMR}$  (400 MHz, Chloroform-*d*)  $\delta$  7.91 (d,  $J$  = 8.4 Hz, 2H), 7.50 (d,  $J$  = 8.4 Hz, 2H), 7.39 – 7.33 (m, 4H), 5.93 (t,  $J$  = 14.4 Hz, 1H), 1.34 (s, 9H), 1.30 (s, 9H).

$^{13}\text{C NMR}$  (100 MHz, Chloroform-*d*)  $\delta$  193.9, 158.1, 152.8 (t,  $J$  = 4.4 Hz), 152.2, 132.2, 130.2, 129.9, 127.9, 125.8, 125.2, 117.0 (t,  $J$  = 21.8 Hz), 35.3, 34.7, 31.2, 31.0.

$^{19}\text{F NMR}$  (376 MHz, Chloroform-*d*)  $\delta$  -80.98 – -81.05 (m), -105.51 – -105.61 (m), -123.60 – -123.68 (m), -125.62 – -125.73 (m).

HRMS:  $m/z$  (ESI) calculated  $[\text{M}+\text{H}]^+$ : 539.1991, measured: 539.1988.

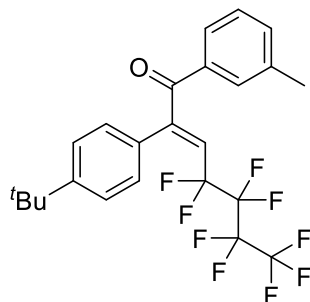

**(E)-2-(4-(tert-butyl)phenyl)-4,4,5,5,6,6,7,7,7-nonafluoro-1-(m-tolyl)hept-2-en-1-one (6d)**

Brown oil, 67% yield (66.5 mg), E/Z>20:1.

$^1\text{H NMR}$  (400 MHz, Chloroform-*d*)  $\delta$  7.76 – 7.62 (m, 2H), 7.41 – 7.32 (m, 6H), 5.97 (t,  $J$  = 14.4 Hz, 1H), 2.39 (s, 3H), 1.30 (s, 9H).

$^{13}\text{C NMR}$  (100 MHz, Chloroform-*d*)  $\delta$  194.5 , 152.7 (t,  $J$  = 4.5 Hz), 152.2 , 138.8 , 135.1 , 134.8 , 130.5 , 129.9 , 128.6 , 128.0 , 127.5 , 125.2 , 117.7 (t,  $J$  = 21.8 Hz), 34.7 , 31.1 , 21.2 .

$^{19}\text{F NMR}$  (376 MHz, Chloroform-*d*)  $\delta$  -81.01 – -81.08 (m), -105.59 – -105.69 (m), -123.73 – -123.80 (m), -125.62 – -125.73 (m).

HRMS:  $m/z$  (ESI) calculated  $[\text{M}+\text{H}]^+$ : 497.1521, measured: 497.1519.

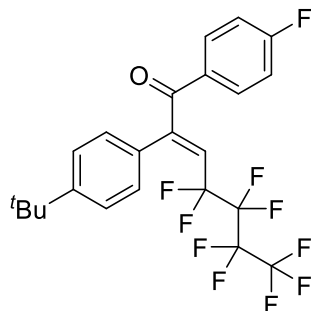

**(E)-2-(4-(tert-butyl)phenyl)-4,4,5,5,6,6,7,7,7-nonafluoro-1-(4-fluorophenyl)hept-2-en-1-one (6e)**

Yellow oil, 71% yield (71.0 mg), E/Z=11:1.

$^1\text{H NMR}$  (400 MHz, Chloroform-*d*)  $\delta$  7.98 – 7.95 (m, 2H), 7.39 (d,  $J$  = 8.4 Hz, 2H), 7.33 (d,  $J$  = 8.4 Hz, 2H), 7.13 (t,  $J$  = 8.4 Hz, 2H), 5.98 (t,  $J$  = 14.4 Hz, 1H), 1.30 (s, 9H).

$^{13}\text{C NMR}$  (100 MHz, Chloroform-*d*)  $\delta$  192.7, 166.2 (d,  $J$  = 255.5 Hz), 152.6 (t,  $J$  = 4.0 Hz), 152.5 , 132.8 (d,  $J$  = 9.5 Hz), 131.4 (d,  $J$  = 2.9 Hz), 129.6 , 128.0 , 125.3 , 117.6 (t,  $J$  = 22.0 Hz), 116.1 (d,  $J$  = 22.0 Hz), 34.7 , 31.1 .

$^{19}\text{F NMR}$  (376 MHz, Chloroform-*d*)  $\delta$  -81.06 – -81.11 (m), -103.00, -105.60 – -105.70 (m), -123.69 – -123.77 (m), -125.68 – -125.76 (m).

HRMS:  $m/z$  (ESI) calculated  $[\text{M}+\text{H}]^+$ : 501.1271, measured: 501.1259.

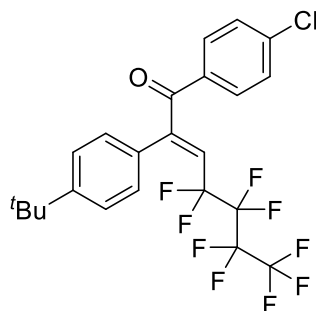

**(E)-2-(4-(tert-butyl)phenyl)-1-(4-chlorophenyl)-4,4,5,5,6,6,7,7,7-nonafluorohept-2-en-1-one (6f)**

Yellow oil, 63% yield (65.0 mg), E/Z>20:1.

$^1\text{H NMR}$  (400 MHz, Chloroform-*d*)  $\delta$  7.86 (d,  $J$  = 8.4 Hz, 2H), 7.43 (d,  $J$  = 8.8 Hz, 2H), 7.38 (d,  $J$  = 8.4 Hz, 2H), 7.31 (d,  $J$  = 8.4 Hz, 2H), 5.99 (t,  $J$  = 14.4 Hz, 1H), 1.30 (s, 9H).

$^{13}\text{C NMR}$  (100 MHz, Chloroform-*d*)  $\delta$  193.1 , 152.6 , 152.4 (t,  $J$  = 3.9 Hz), 140.6 , 133.3 , 131.4 , 129.5 , 129.2 , 128.0 , 125.3 , 118.0 (t,  $J$  = 22.1 Hz), 34.7 , 31.1 .

$^{19}\text{F NMR}$  (376 MHz, Chloroform-*d*)  $\delta$  -81.03 – -81.08 (m), -105.63 – -105.70 (m), -123.67 – -123.74 (m), -125.64 – -125.75 (m).

HRMS:  $m/z$  (ESI) calculated  $[\text{M}+\text{H}]^+$ : 517.0975, measured: 517.0961.

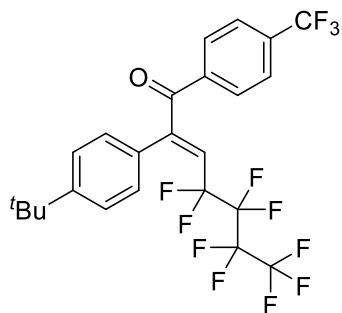

**(E)-2-(4-(tert-butyl)phenyl)-4,4,5,5,6,6,7,7,7-nonafluoro-1-(4-(trifluoromethyl)phenyl)hept-2-en-1-one (6g)**

Yellow oil, 50% yield (55.0 mg), E/Z>20:1.

$^1\text{H}$  NMR (400 MHz, Chloroform-*d*)  $\delta$  8.04 (d,  $J$  = 8.0 Hz, 2H), 7.76 (d,  $J$  = 8.4 Hz, 2H), 7.43 (d,  $J$  = 8.4 Hz, 2H), 7.34 (d,  $J$  = 8.4 Hz, 12H), 6.08 (t,  $J$  = 14.4 Hz, 1H), 1.34 (s, 9H).

$^{13}\text{C}$  NMR (100 MHz, Chloroform-*d*)  $\delta$  193.25, 77, 152.10 (t,  $J$  = 4.5 Hz), 137.91, 135.09 (q,  $J$  = 32.7 Hz), 130.30, 129.17, 128.08, 125.82 (q,  $J$  = 3.7 Hz), 125.41, 123.39 (q,  $J$  = 271.2 Hz), 118.99 (q,  $J$  = 22.1 Hz), 34.73, 31.12.

$^{19}\text{F}$  NMR (376 MHz, Chloroform-*d*)  $\delta$  -63.39 -81.02 – -81.09 (m), -105.76 – -105.84 (m), -123.64 – -123.72 (m), -125.67 – -125.75 (m).

HRMS:  $m/z$  (ESI) calculated  $[\text{M}+\text{Na}]^+$ : 573.1058, measured: 573.1034.

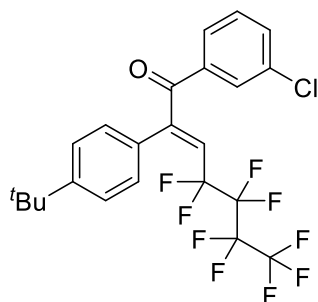

**(E)-2-(4-(tert-butyl)phenyl)-1-(3-chlorophenyl)-4,4,5,5,6,6,7,7,7-nonafluorohept-2-en-1-one (6h)**

Yellow oil, 58% yield (59.9 mg), E/Z=8:1.

$^1\text{H}$  NMR (400 MHz, Chloroform-*d*)  $\delta$  7.89 (t,  $J$  = 2.0 Hz, 1H), 7.77 – 7.75 (m, 1H), 7.56 – 7.53 (m, 1H), 7.39 (d,  $J$  = 8.4 Hz, 3H), 7.31 (d,  $J$  = 8.4 Hz, 2H), 6.01 (t,  $J$  = 14.0 Hz, 1H), 1.30 (s, 9H)

$^{13}\text{C}$  NMR (100 MHz, Chloroform-*d*)  $\delta$  193.0, 152.6, 152.1 (t,  $J$  = 4.1 Hz), 136.7, 135.2, 133.8, 130.0, 129.9, 129.3, 128.2, 128.1, 125.3, 118.5 (t,  $J$  = 21.8 Hz), 34.7, 31.1 ..

$^{19}\text{F}$  NMR (376 MHz, Chloroform-*d*)  $\delta$  -80.99 – -81.05 (m), -105.67 – -105.77 (m), -123.69 – -123.76 (m), -125.63 – -125.71 (m).

HRMS:  $m/z$  (ESI) calculated  $[\text{M}+\text{H}]^+$ : 517.0975, measured: 517.0961.

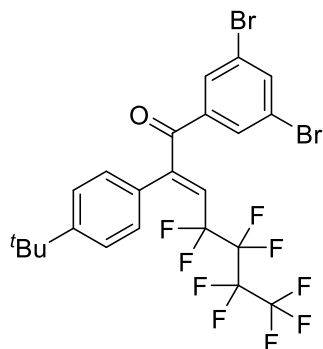

**(E)-2-(4-(tert-butyl)phenyl)-1-(3,5-dibromophenyl)-4,4,5,5,6,6,7,7,7-nonafluorohept-2-en-1-one (6i)**

Yellow oil, 61% yield (77.8 mg), E/Z>20:1.

$^1\text{H NMR}$  (400 MHz, Chloroform-*d*)  $\delta$  7.89 (d,  $J = 2.0$  Hz, 2H), 7.84 (t,  $J = 1.6$  Hz, 1H), 7.40 (d,  $J = 8.4$  Hz, 2H), 7.27 (d,  $J = 8.4$  Hz, 2H), 6.06 (t,  $J = 14.0$  Hz, 1H), 1.31 (s, 9H).

$^{13}\text{C NMR}$  (100 MHz, Chloroform-*d*)  $\delta$  191.5 , 152.9 , 151.4 (t,  $J = 3.7$  Hz), 138.9 , 138.0 , 131.6 , 129.0 , 128.1 , 125.5 , 123.5 , 119.4 (t,  $J = 21.8$  Hz), 34.8 , 31.1 .

$^{19}\text{F NMR}$  (376 MHz, Chloroform-*d*)  $\delta$  -80.97 – -81.03 (m), -105.77 – -105.86 (m), -123.74 – -123.81 (m), -125.59 – -125.70 (m).

HRMS:  $m/z$  (ESI) calculated  $[\text{M}+\text{H}]^+$ :638.9575, measured:638.9557.

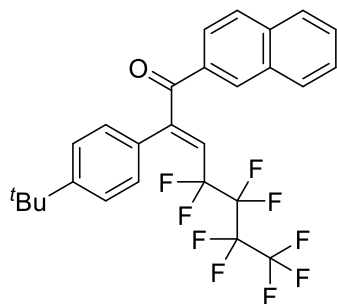

**(E)-2-(4-(tert-butyl)phenyl)-4,4,5,5,6,6,7,7,7-nonafluoro-1-(naphthalen-2-yl)hept-2-en-1-one (6j)**

Brown oil, 63% yield (67.0 mg), E/Z=9:1.

$^1\text{H NMR}$  (400 MHz, Chloroform-*d*)  $\delta$  8.44 (s, 1H), 8.02 – 7.99 (m, 1H), 7.94 (d,  $J = 8.0$  Hz, 1H), 7.91 – 7.85 (m, 2H), 7.63 – 7.56 (m, 2H), 7.44 – 7.42 (m, 1H), 7.39 (m, 3H), 6.06 (t,  $J = 14.4$  Hz, 1H), 1.29 (s, 9H).

$^{13}\text{C NMR}$  (100 MHz, Chloroform-*d*)  $\delta$  194.3 , 152.8 (t,  $J = 4.1$  Hz), 152.3 , 135.9 , 133.0 , 132.3 , 132.3 , 129.9 , 129.8 , 129.2 , 128.8 , 128.1 , 127.8 , 127.1 , 125.2 , 124.8 , 117.7 (t,  $J = 21.9$  Hz), 34.7 , 31.1 .

$^{19}\text{F NMR}$  (376 MHz, Chloroform-*d*)  $\delta$  -80.96 – -81.01 (m), -105.49 – -105.55 (m), -123.63 – -123.71 (m), -125.56 – -125.63 (m).

HRMS:  $m/z$  (ESI) calculated  $[\text{M}+\text{H}]^+$ : 533.1521, measured: 533.1518.

**6.  $^1\text{H NMR}$ ,  $^{13}\text{C NMR}$ ,  $^{19}\text{F NMR}$  Spectra for Substrates 4a-4q, 5a-5s, 6a-6j. and 1D-NOESY for Product 4k.**

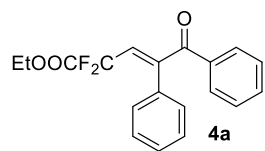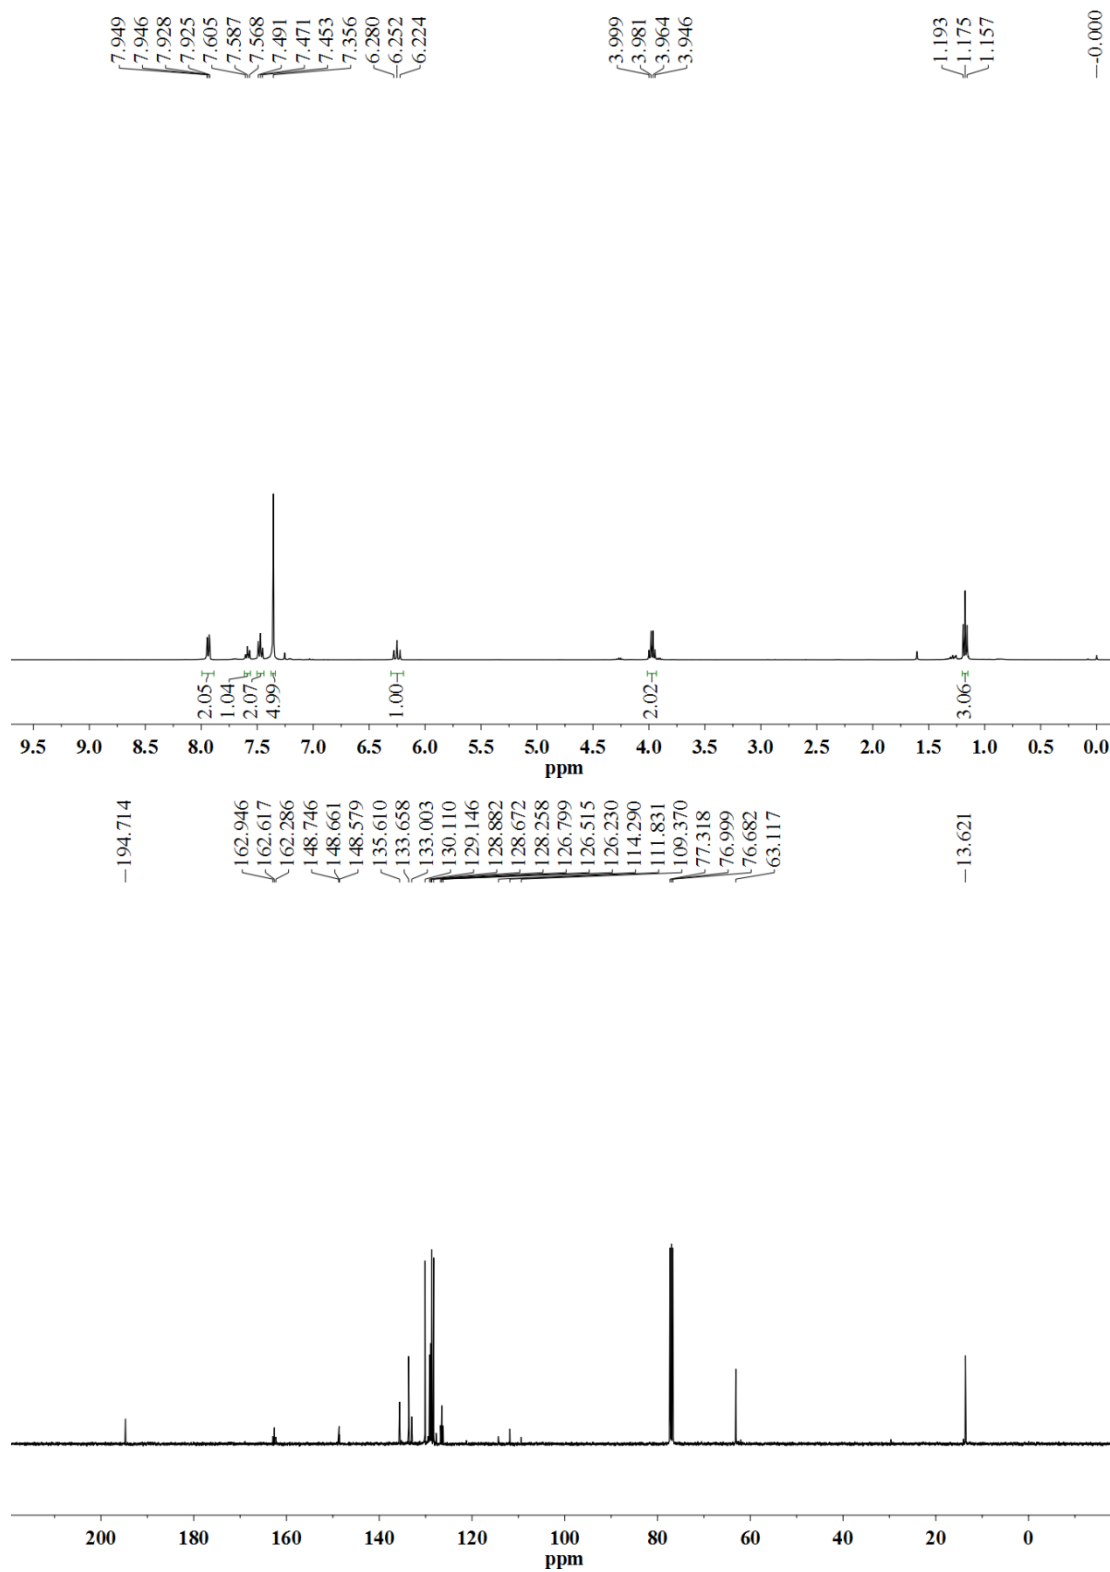

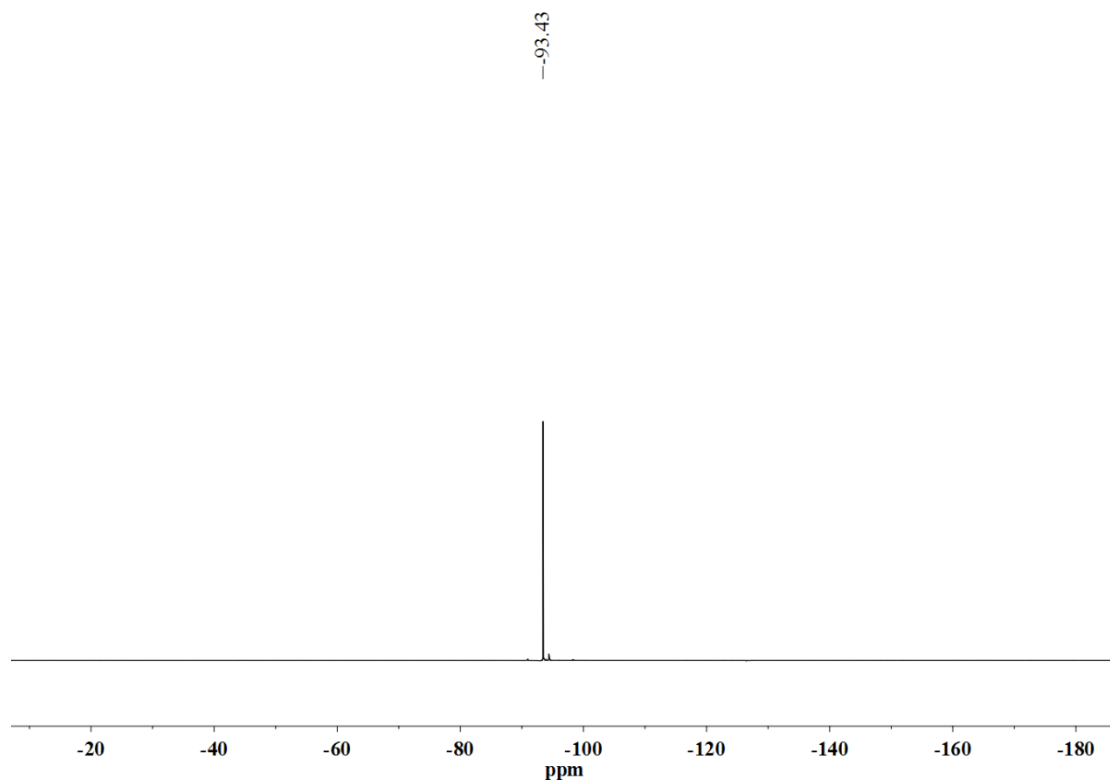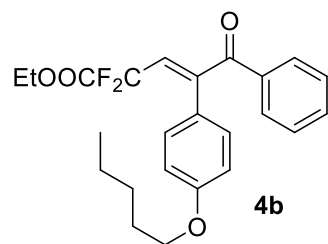

7.926, 7.909, 7.590, 7.572, 7.553, 7.475, 7.456, 7.437, 7.284, 7.263, 6.866, 6.844, 6.188, 6.160, 6.132, 4.029, 4.011, 3.993, 3.975, 3.949, 3.932, 3.916, 1.799, 1.783, 1.765, 1.746, 1.730, 1.439, 1.418, 1.390, 1.375, 1.359, 1.336, 1.195, 1.177, 1.159, 0.938, 0.920, 0.903, -0.000

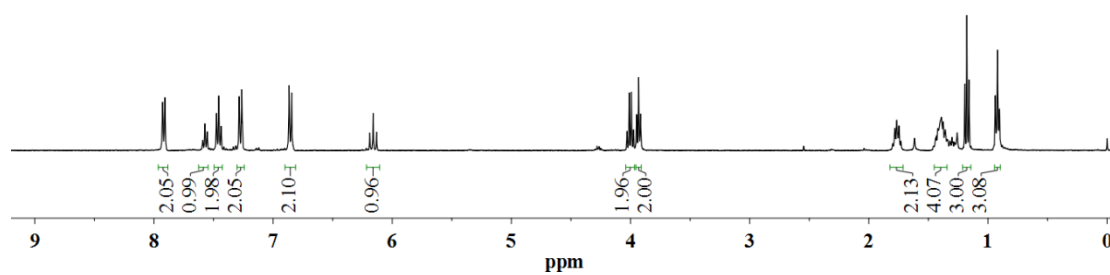

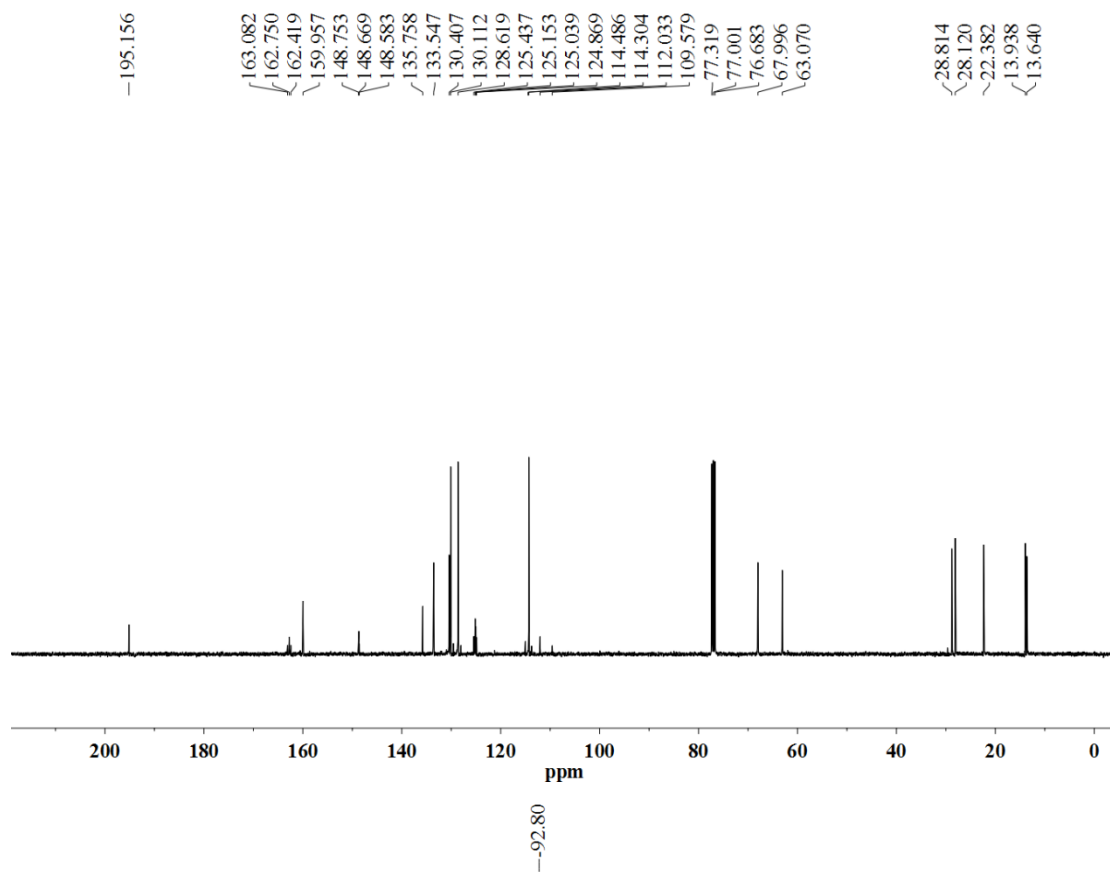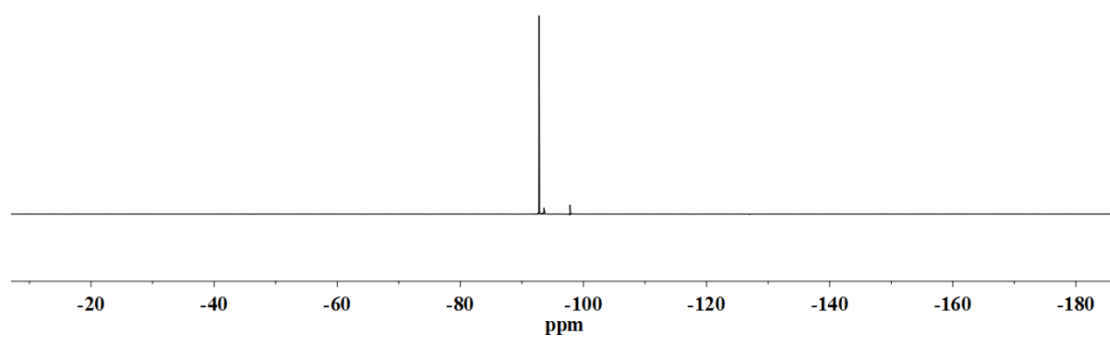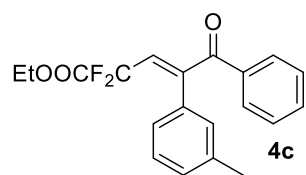



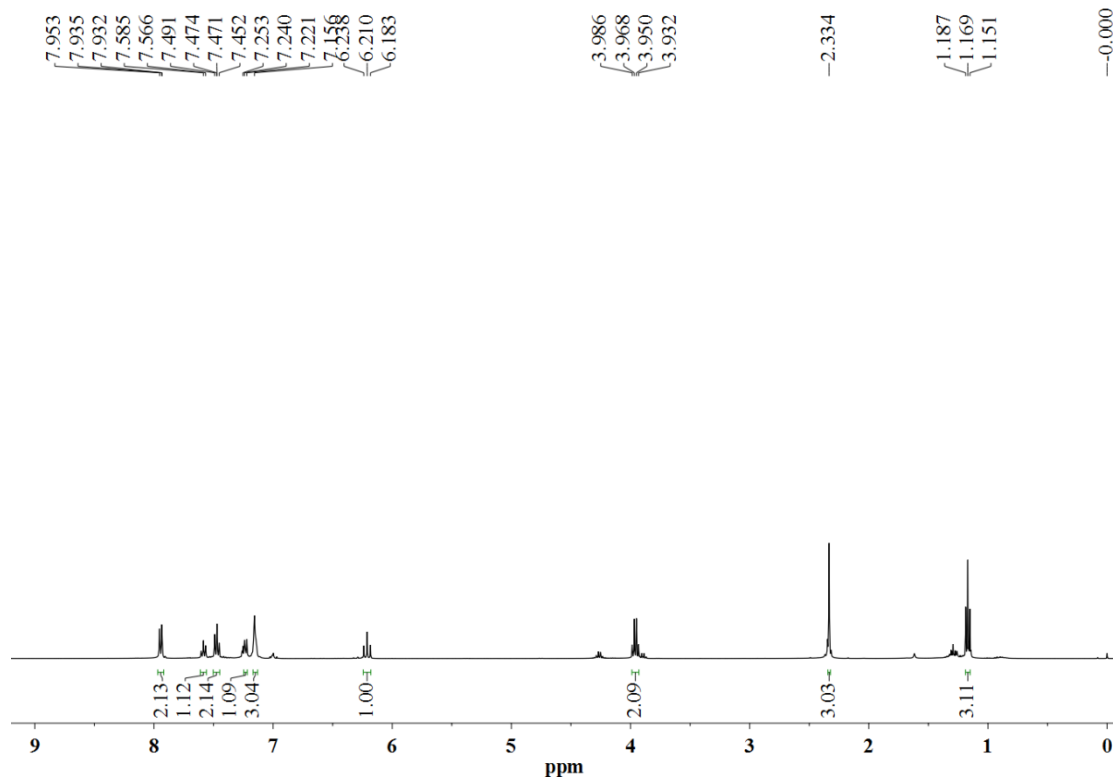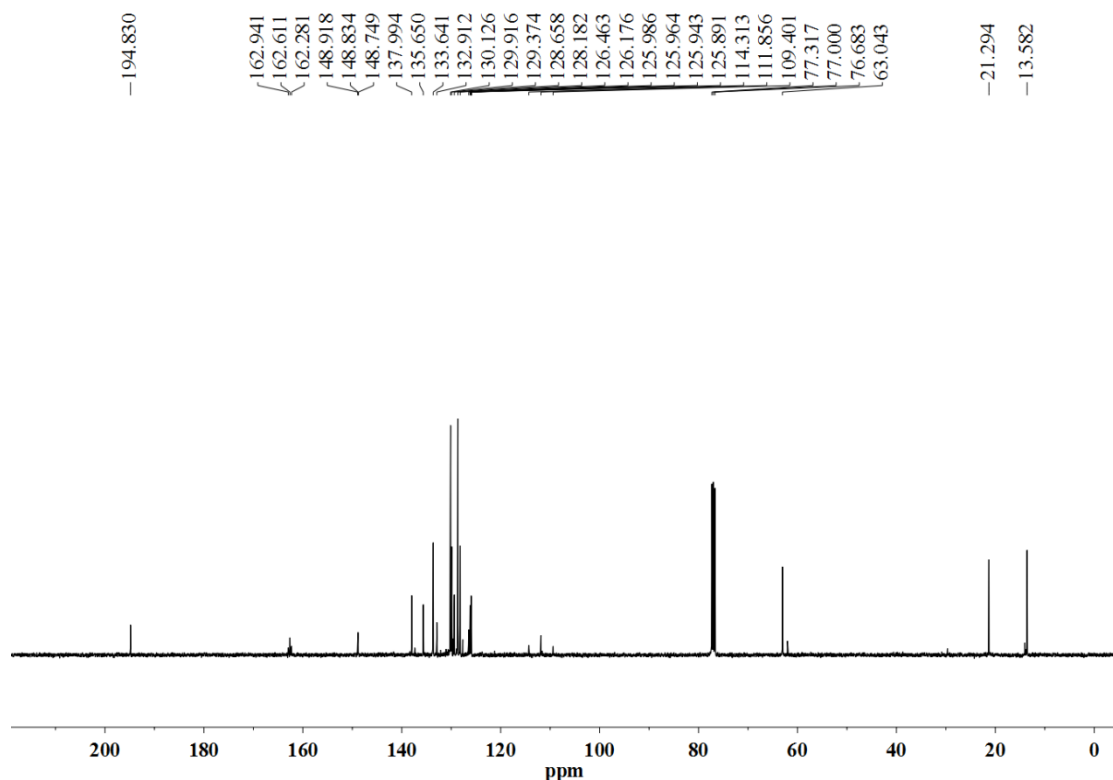

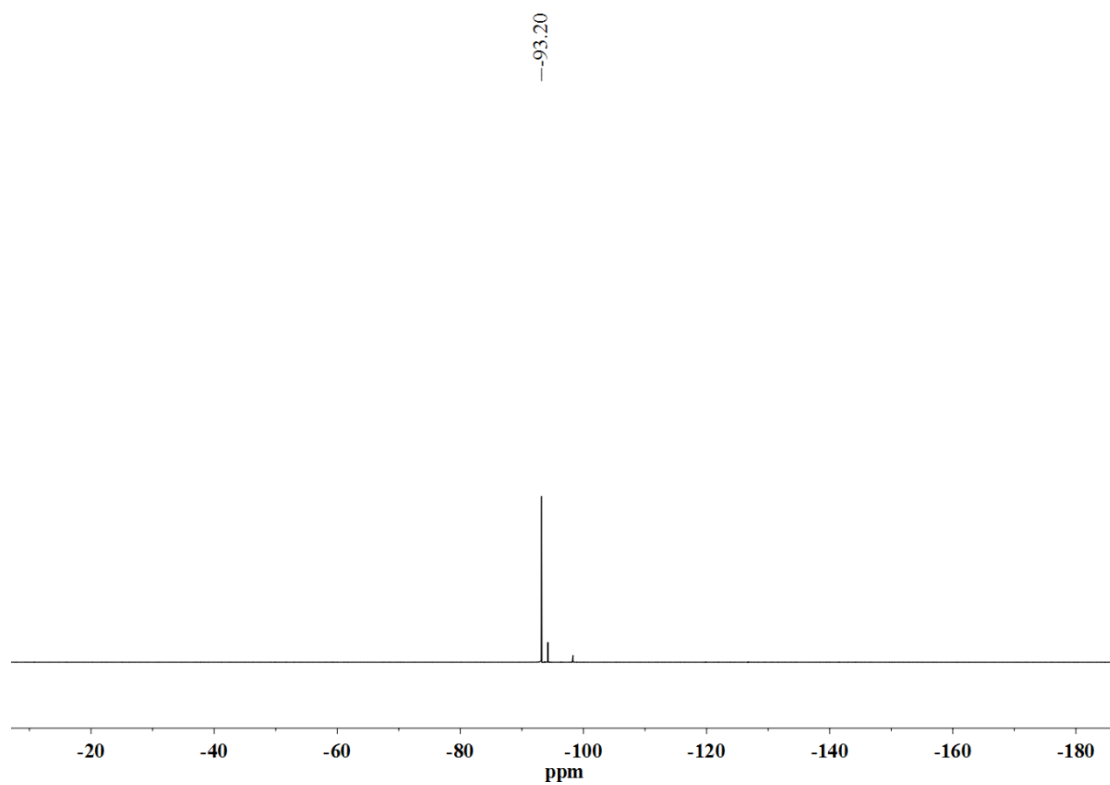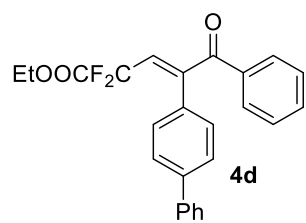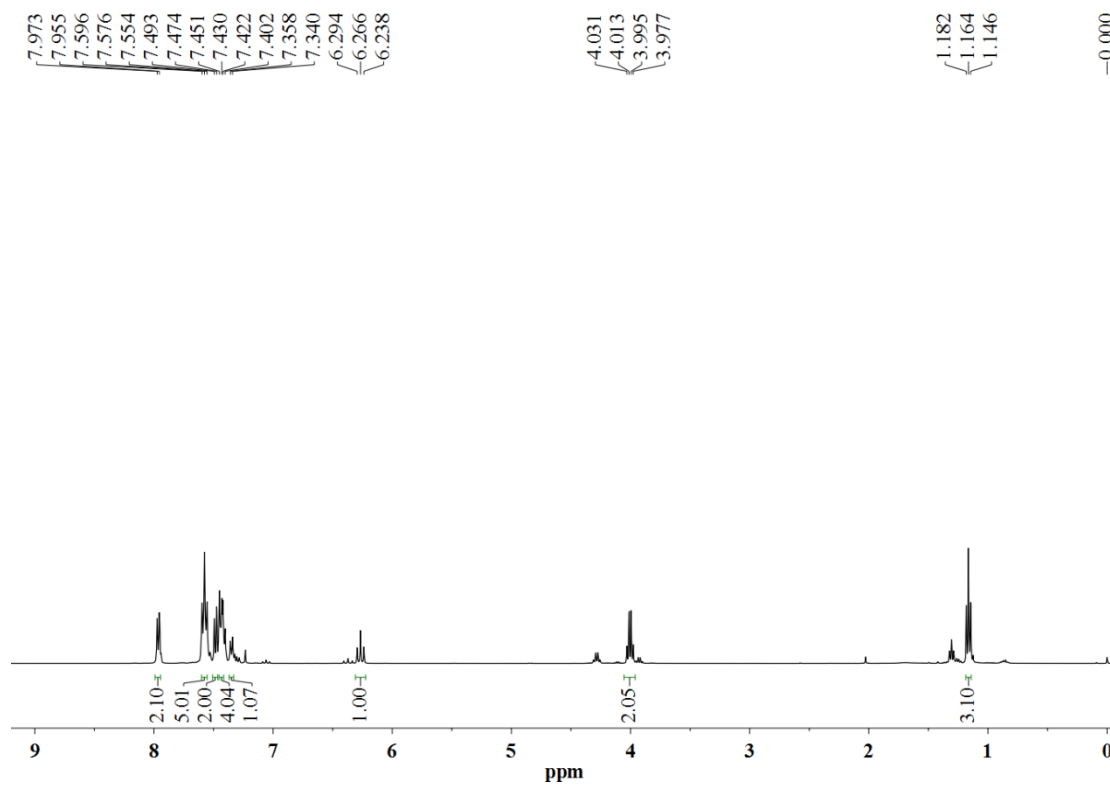

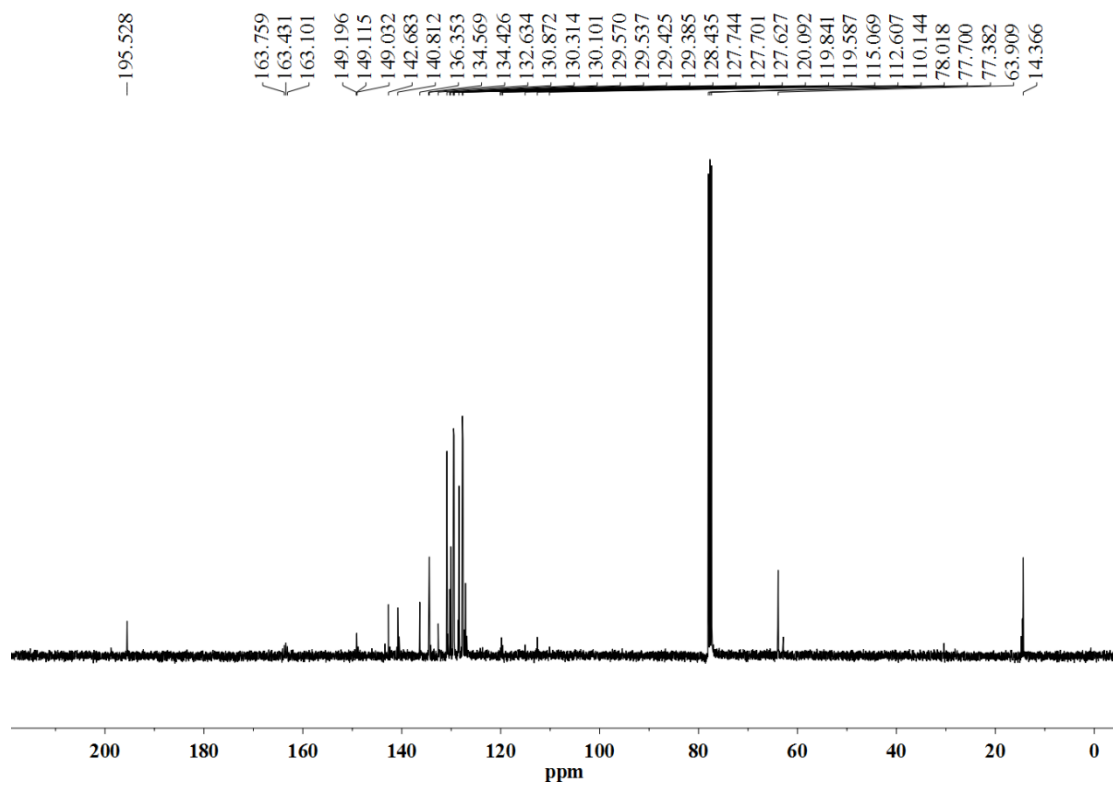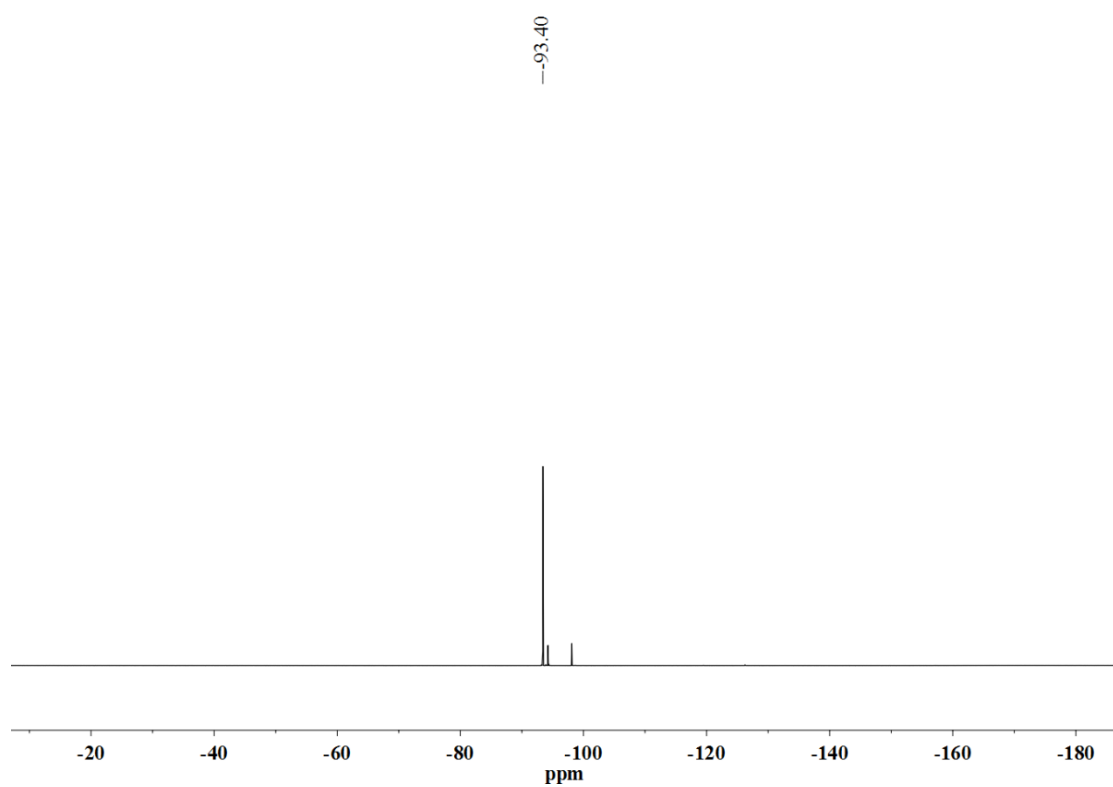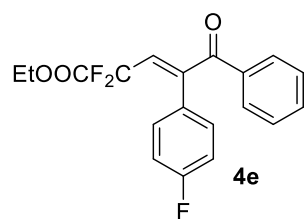

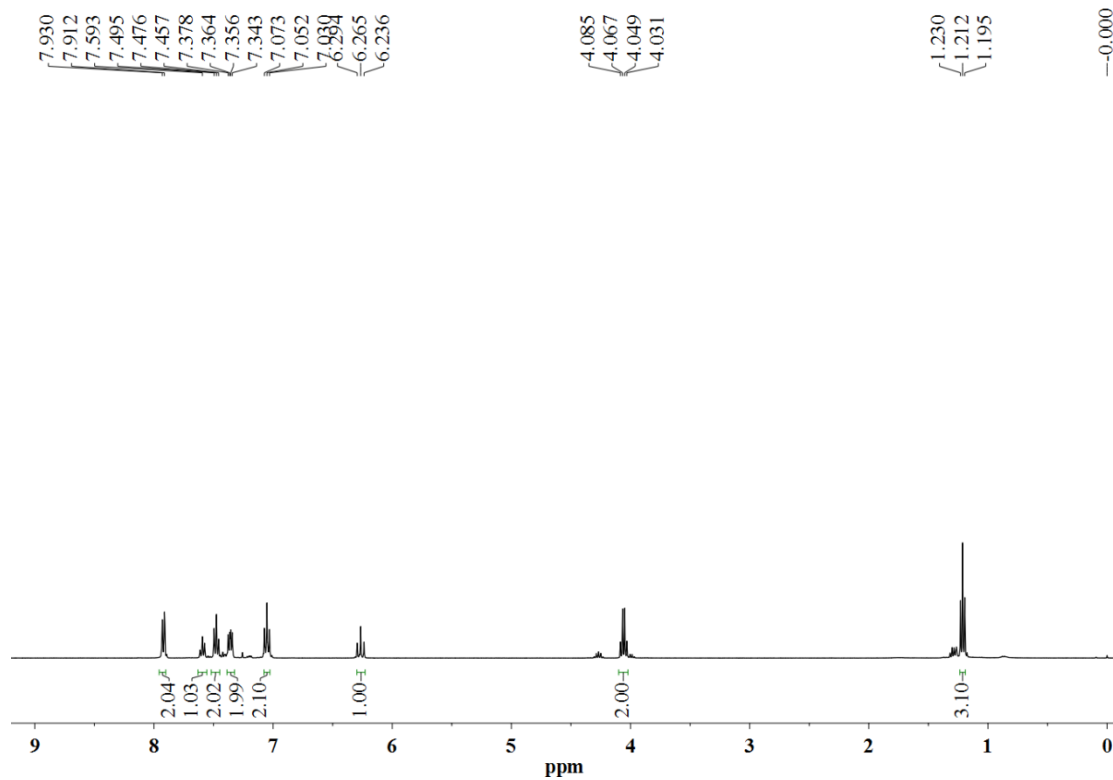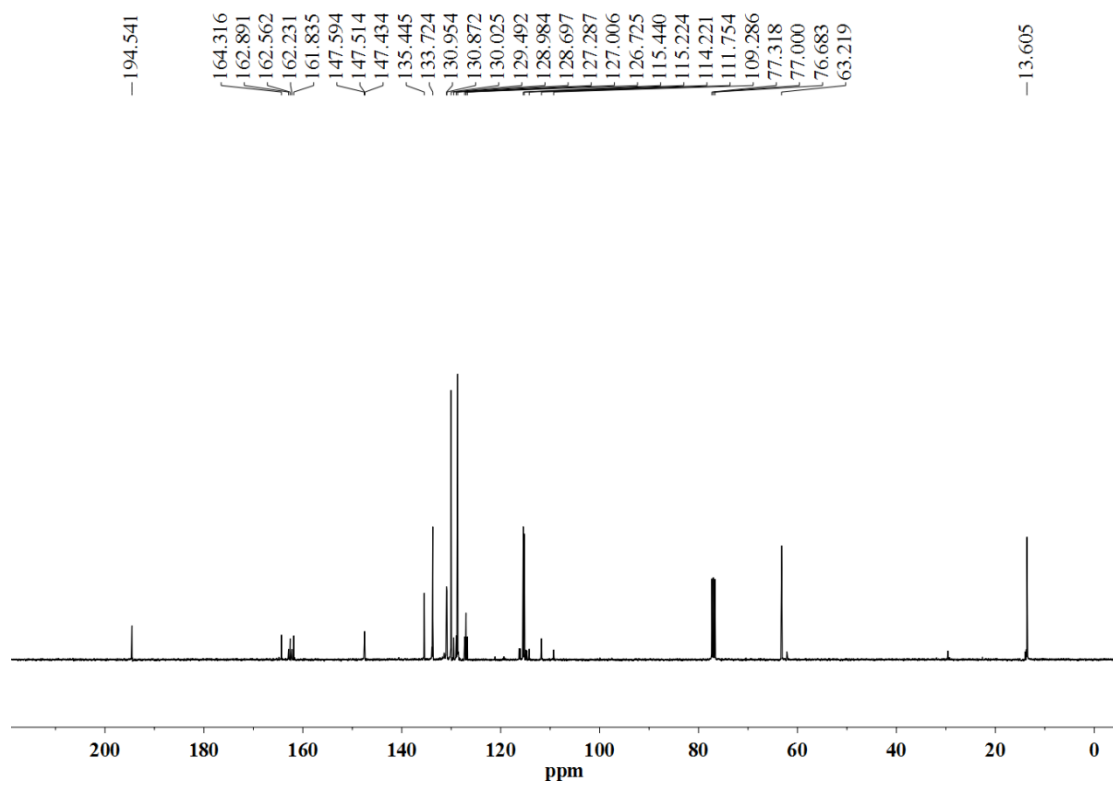

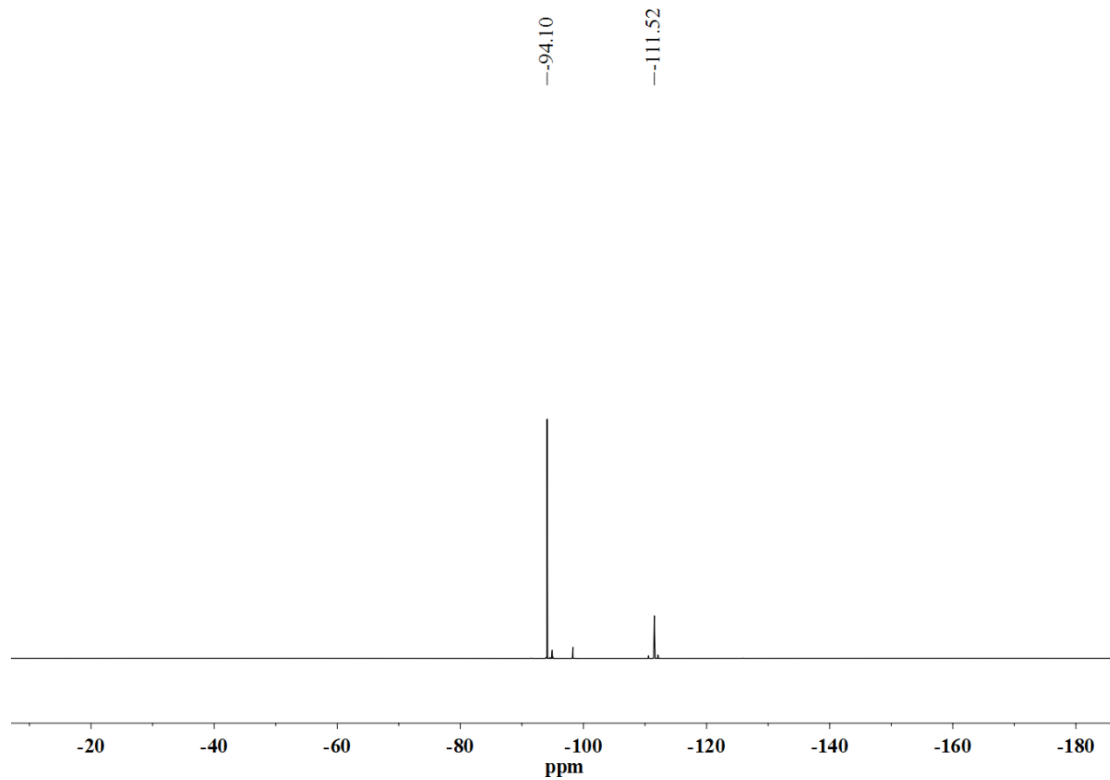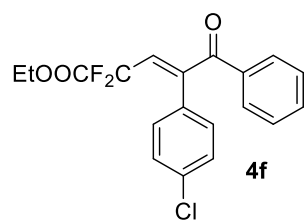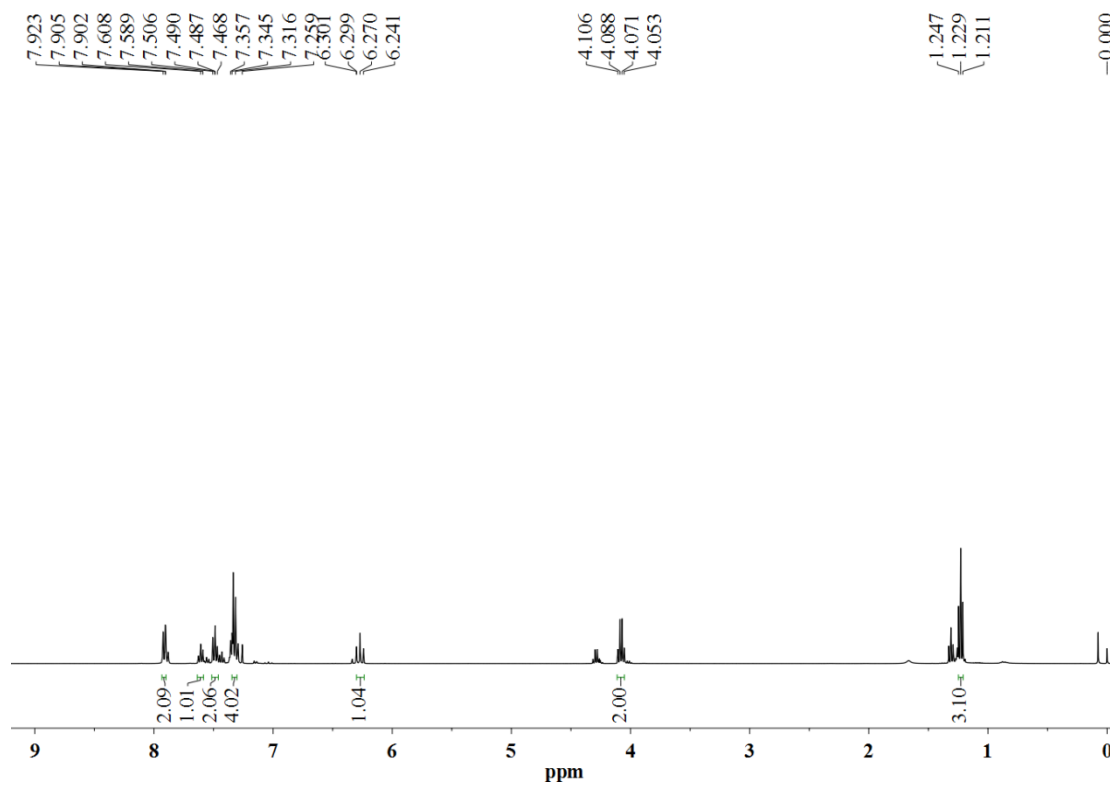

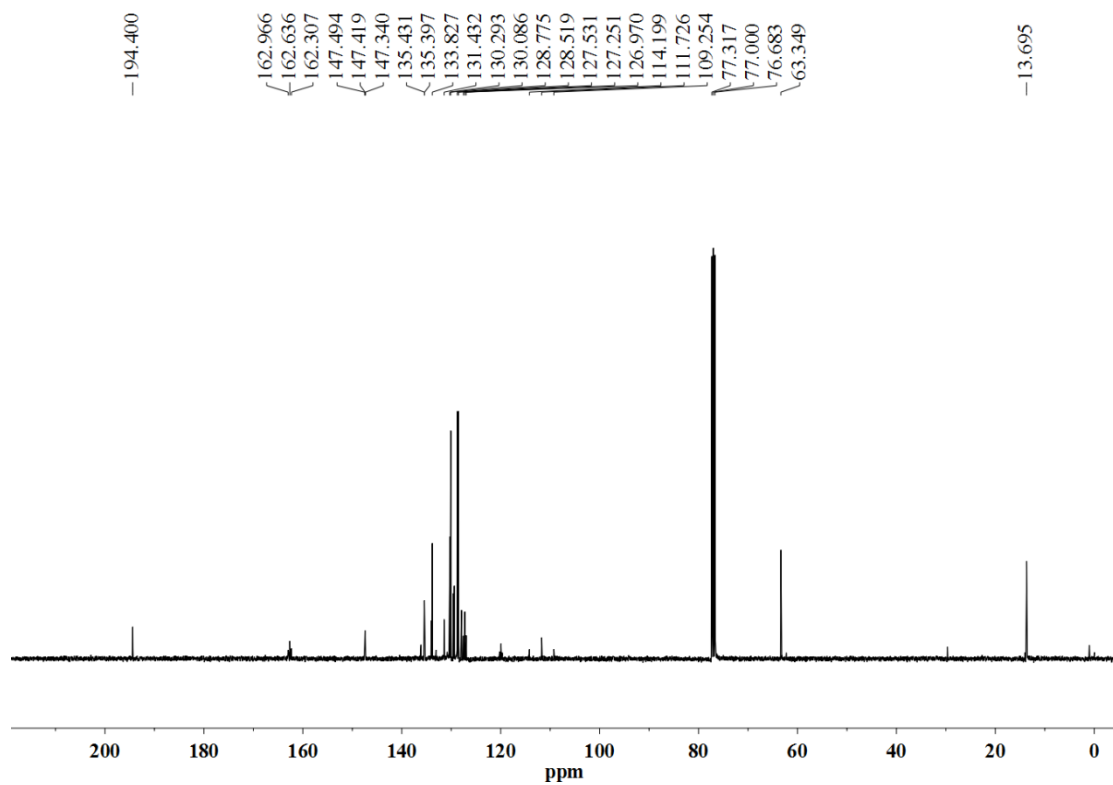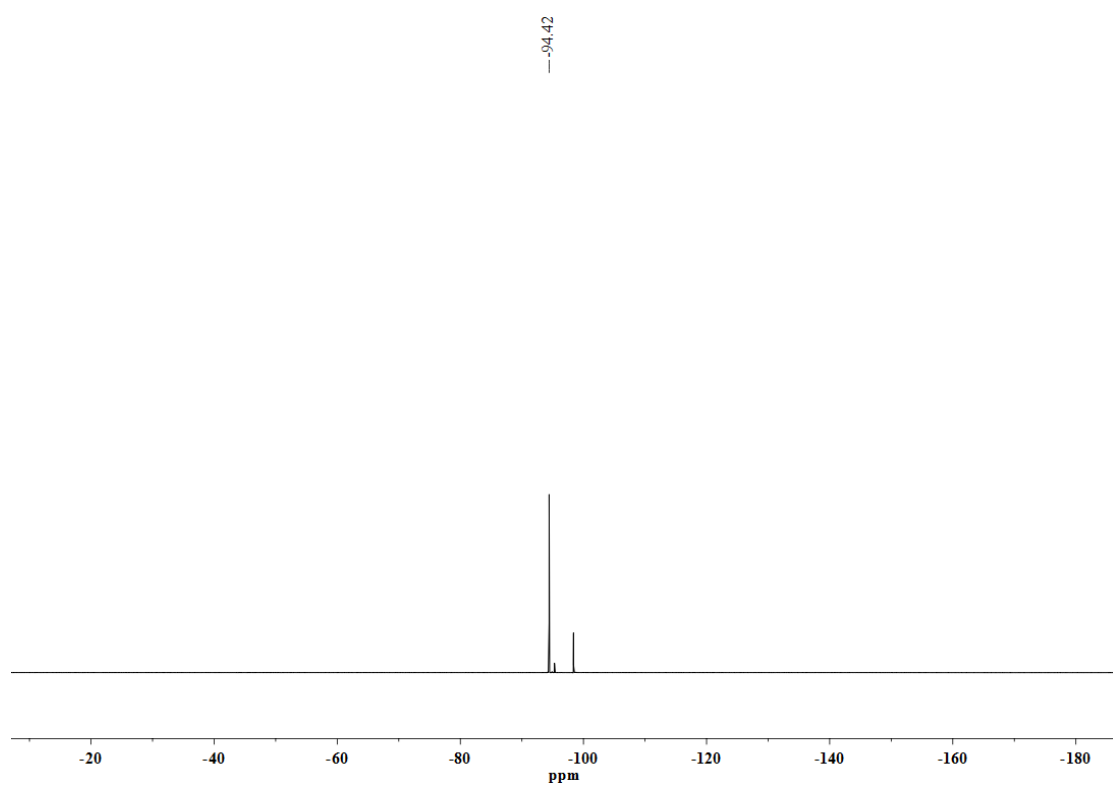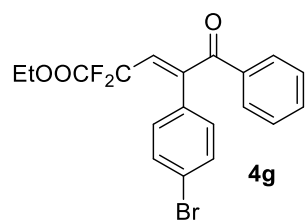

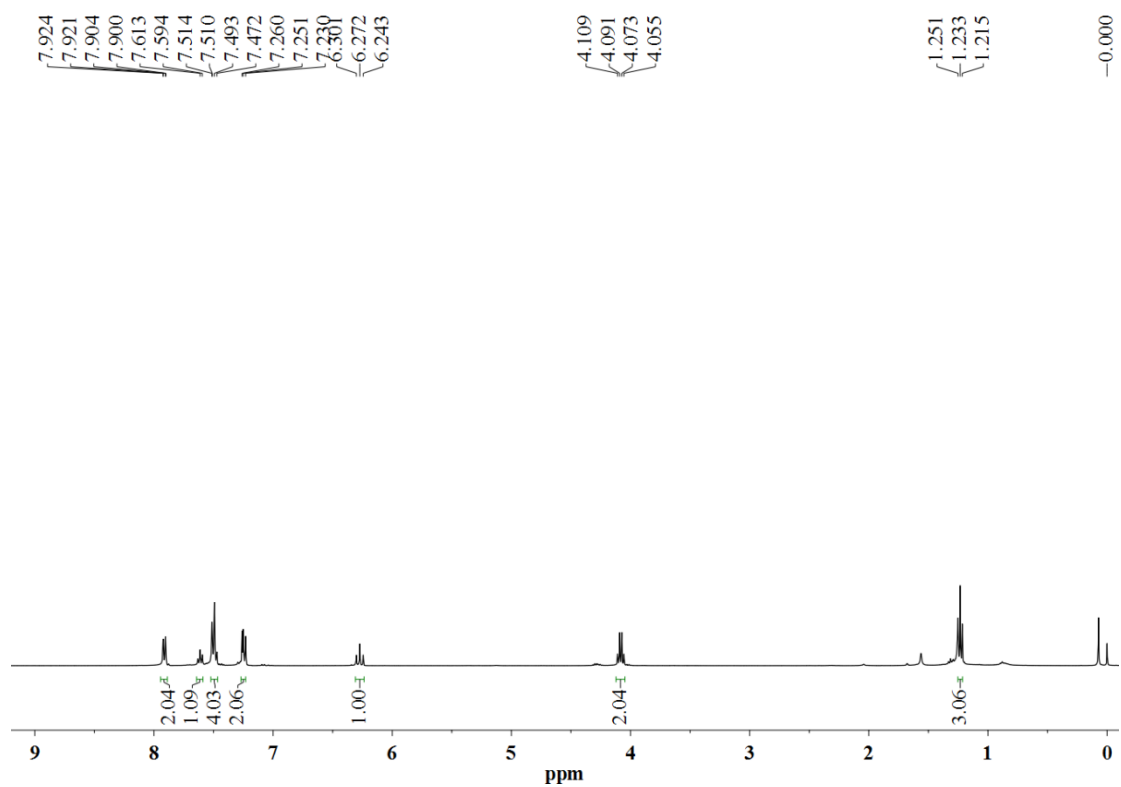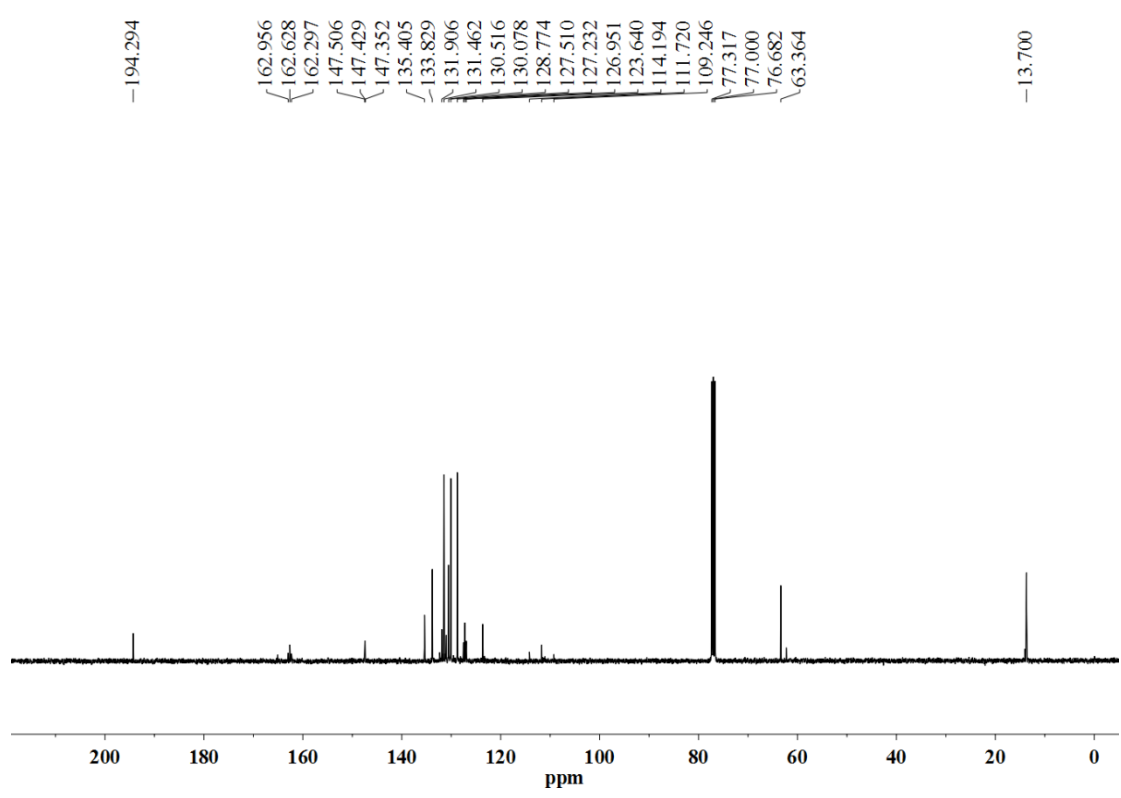

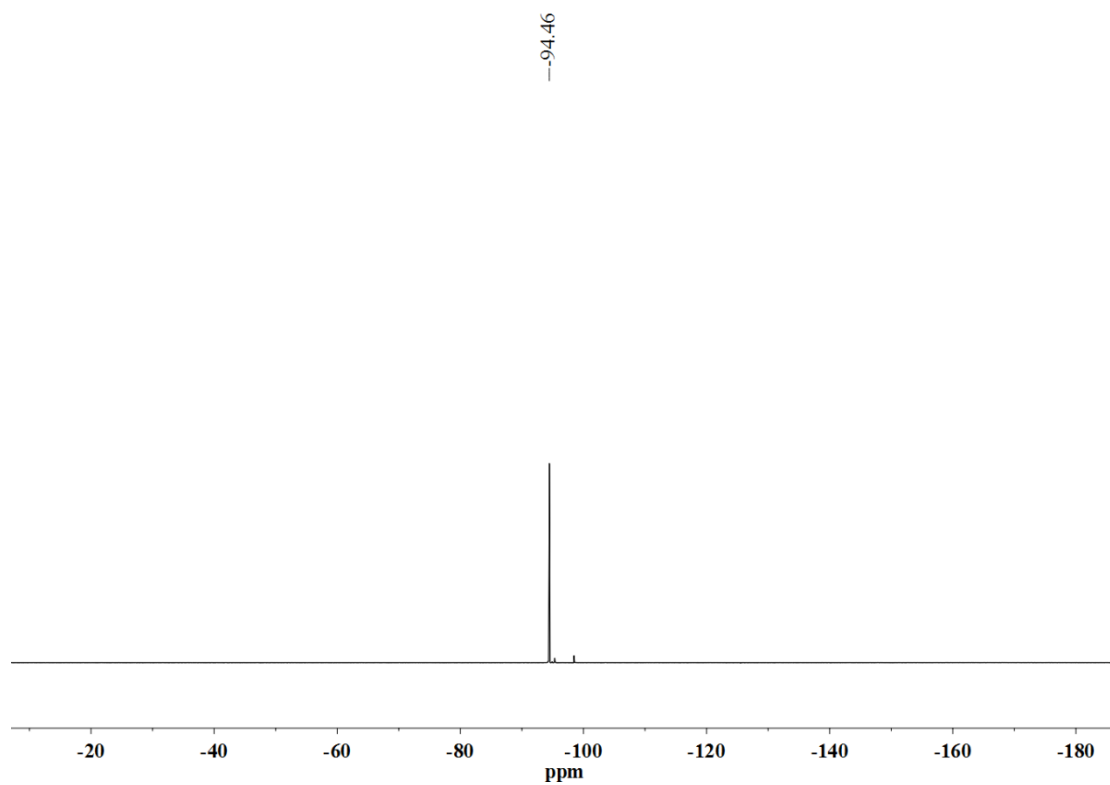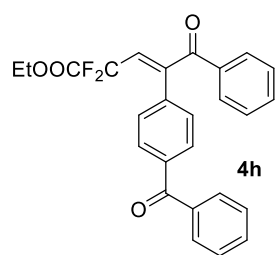



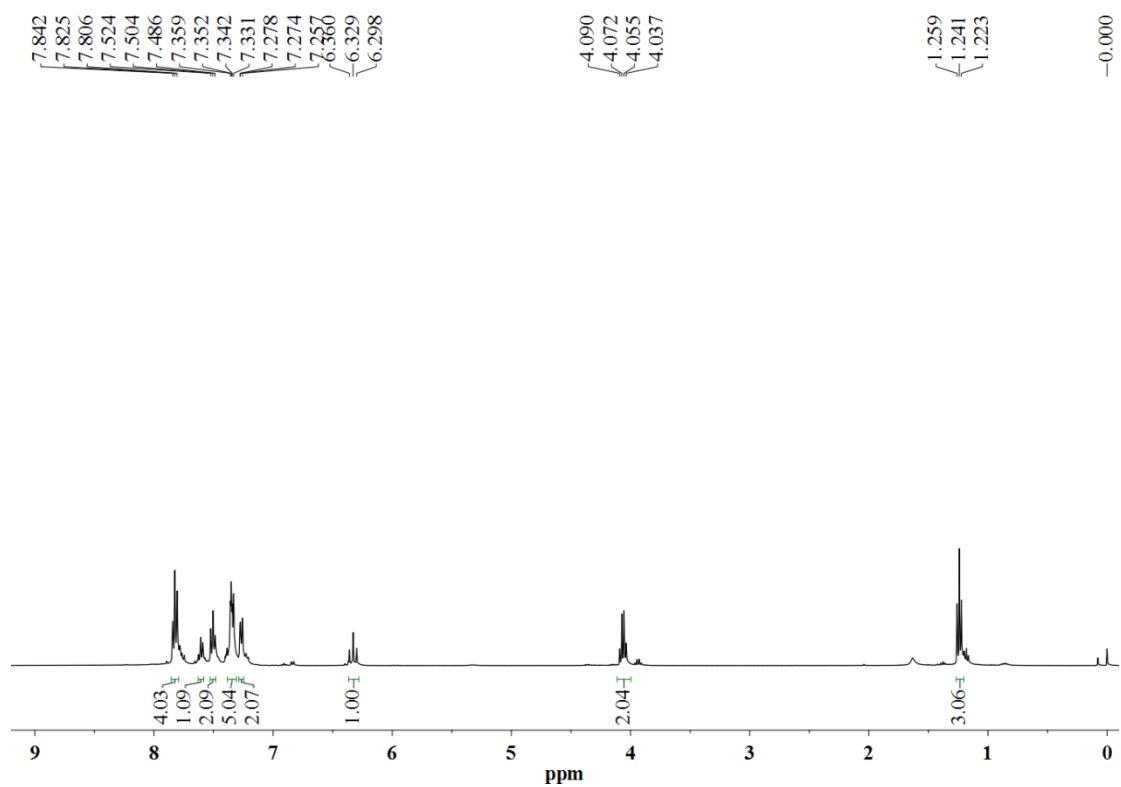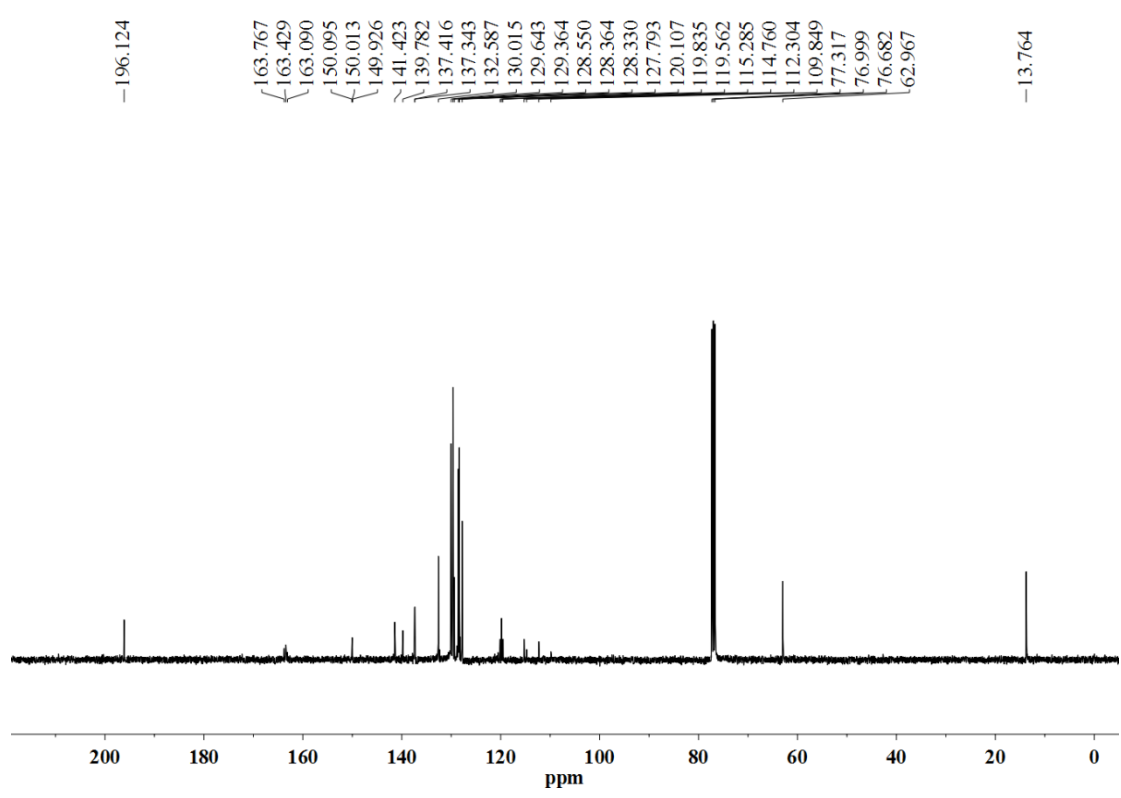

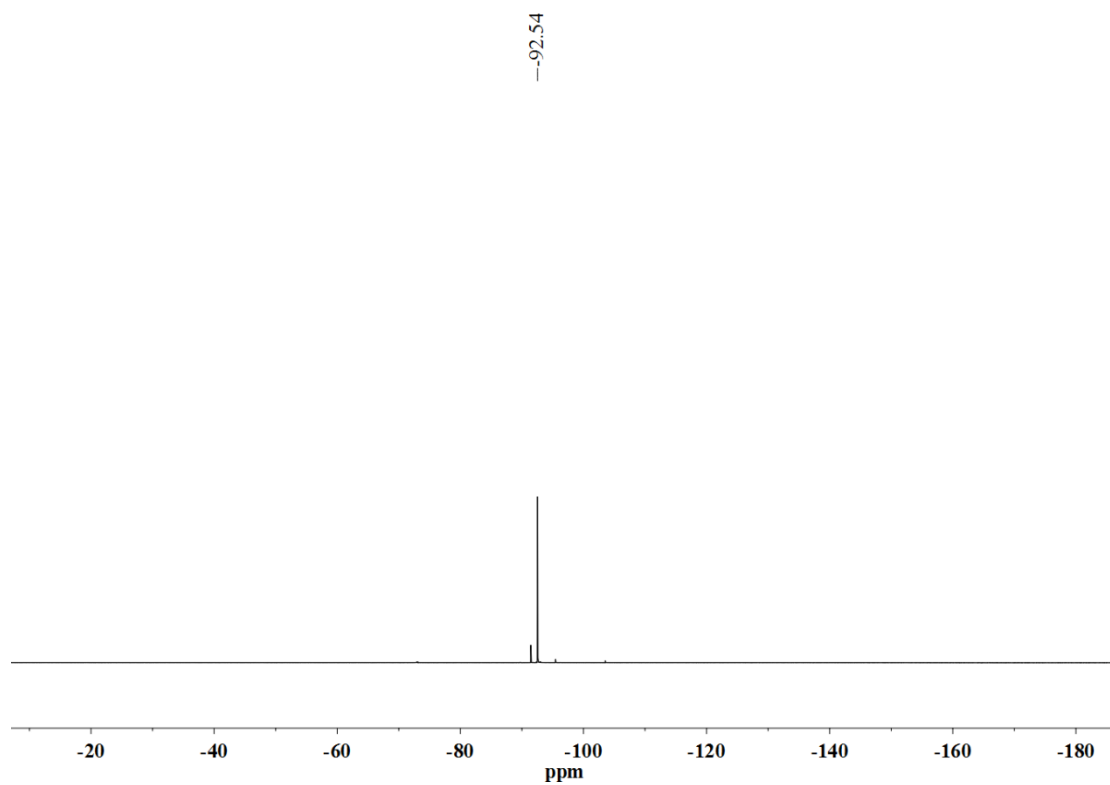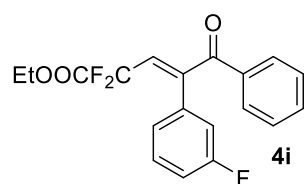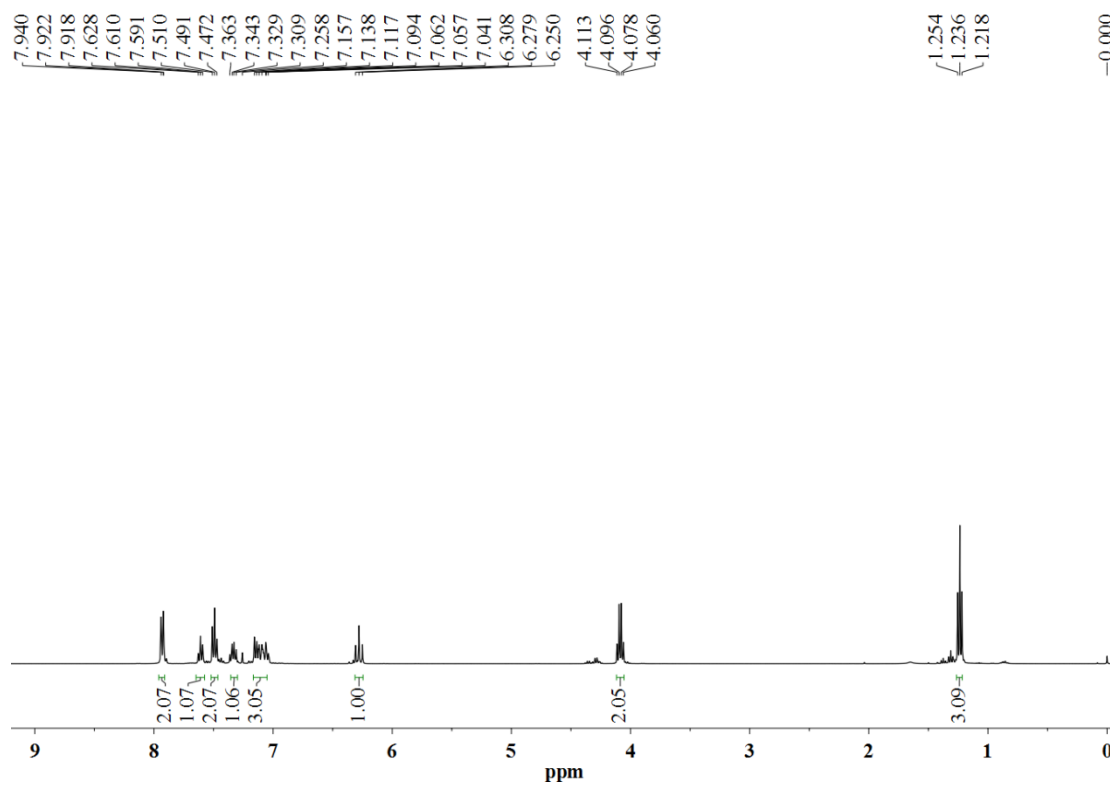

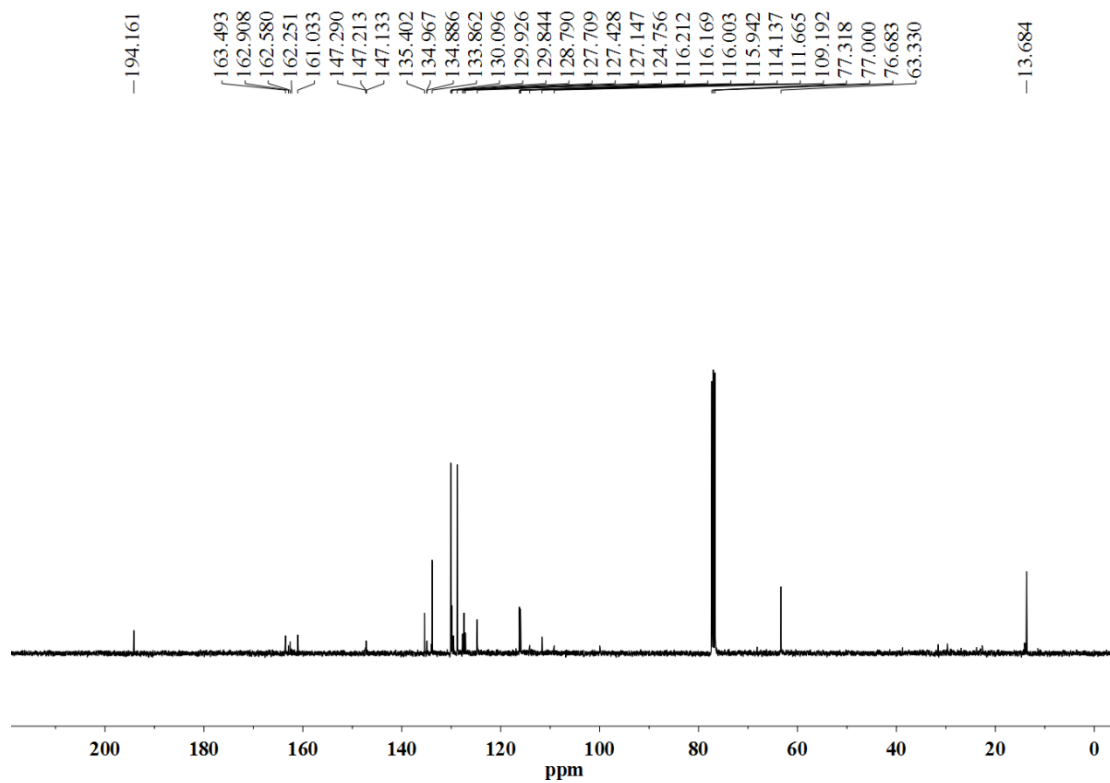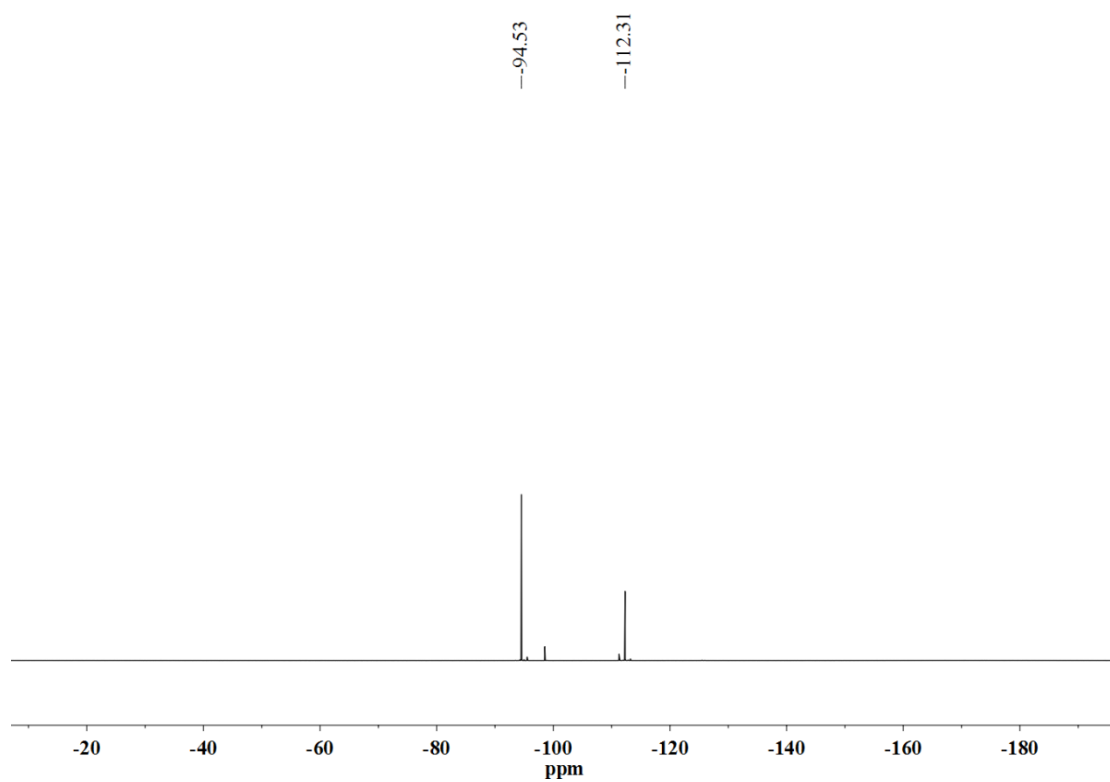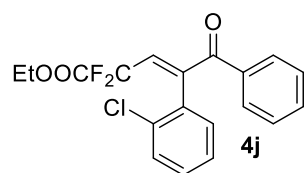

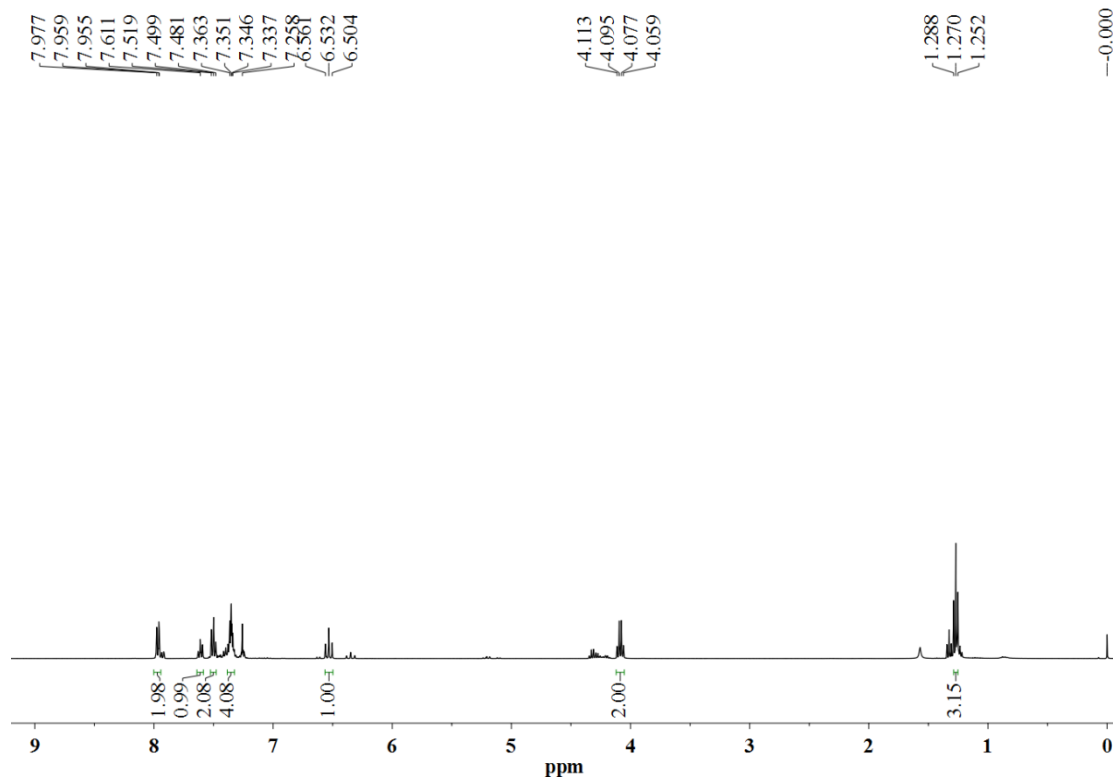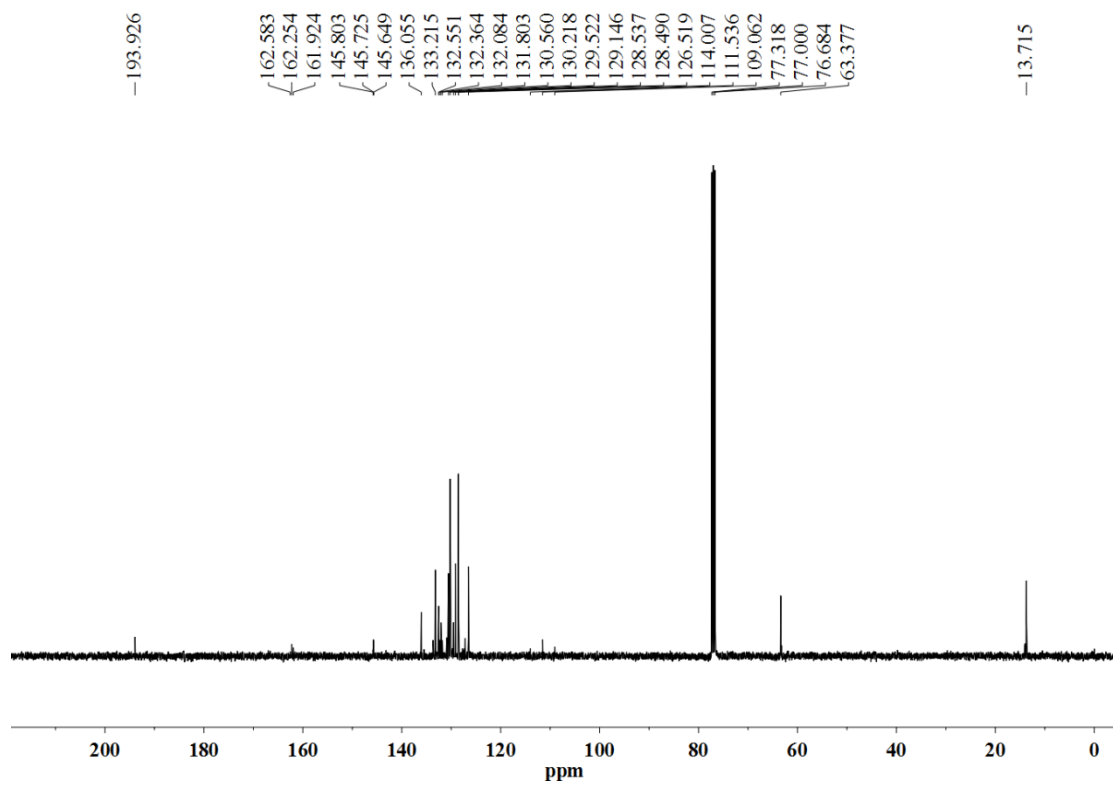

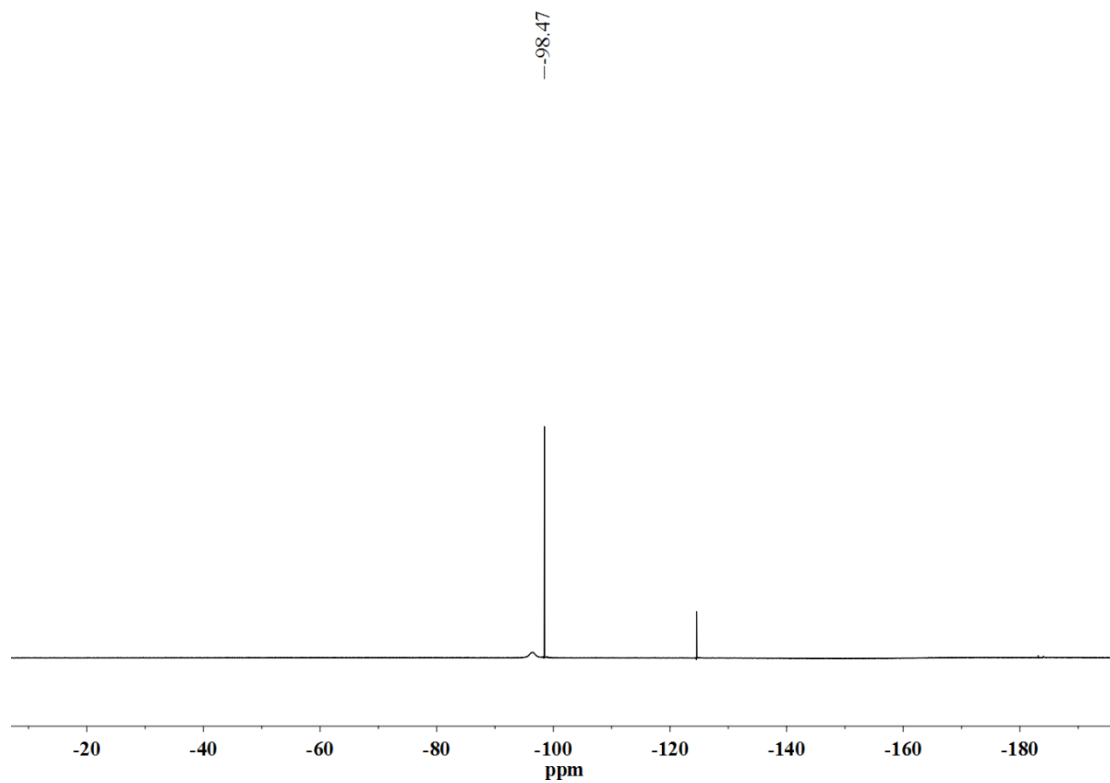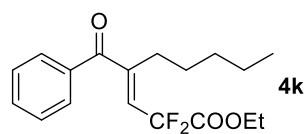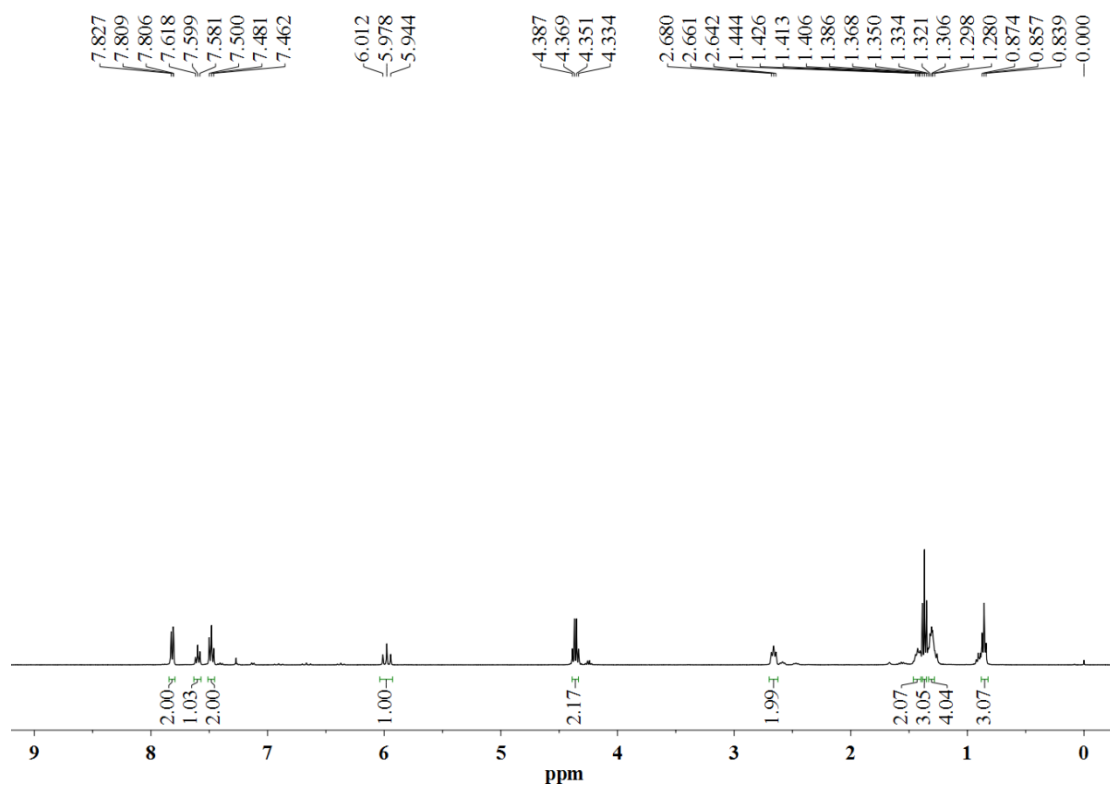

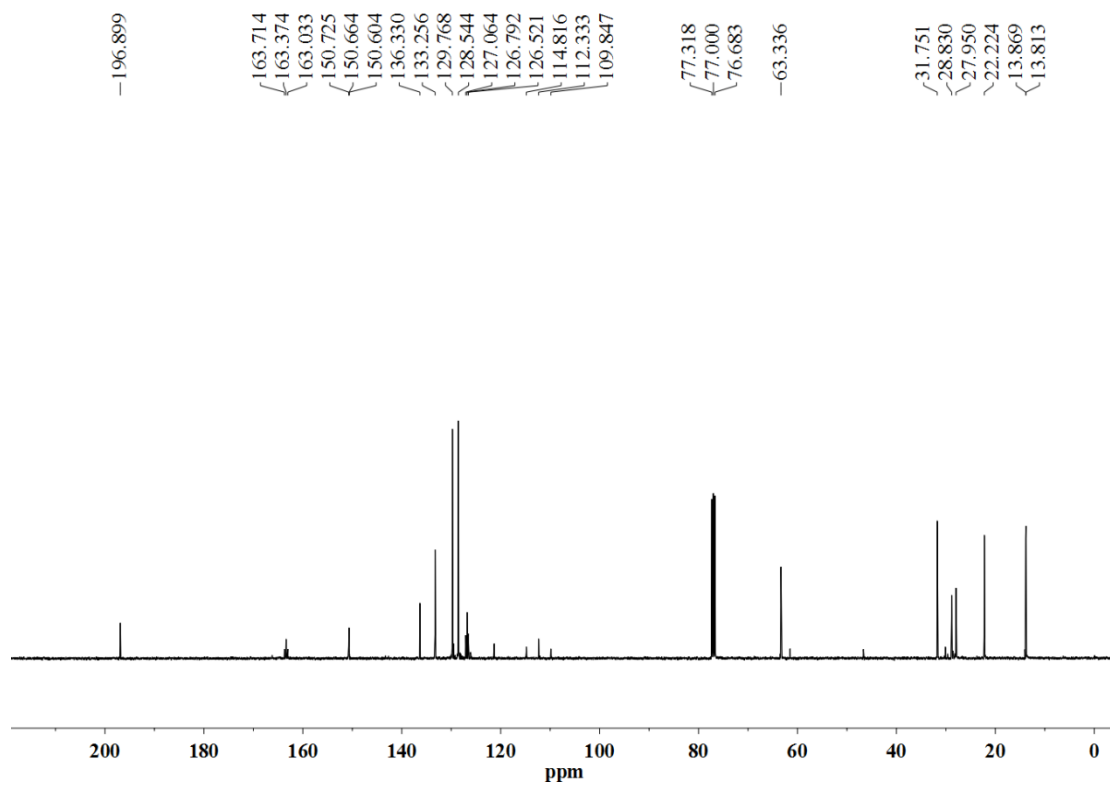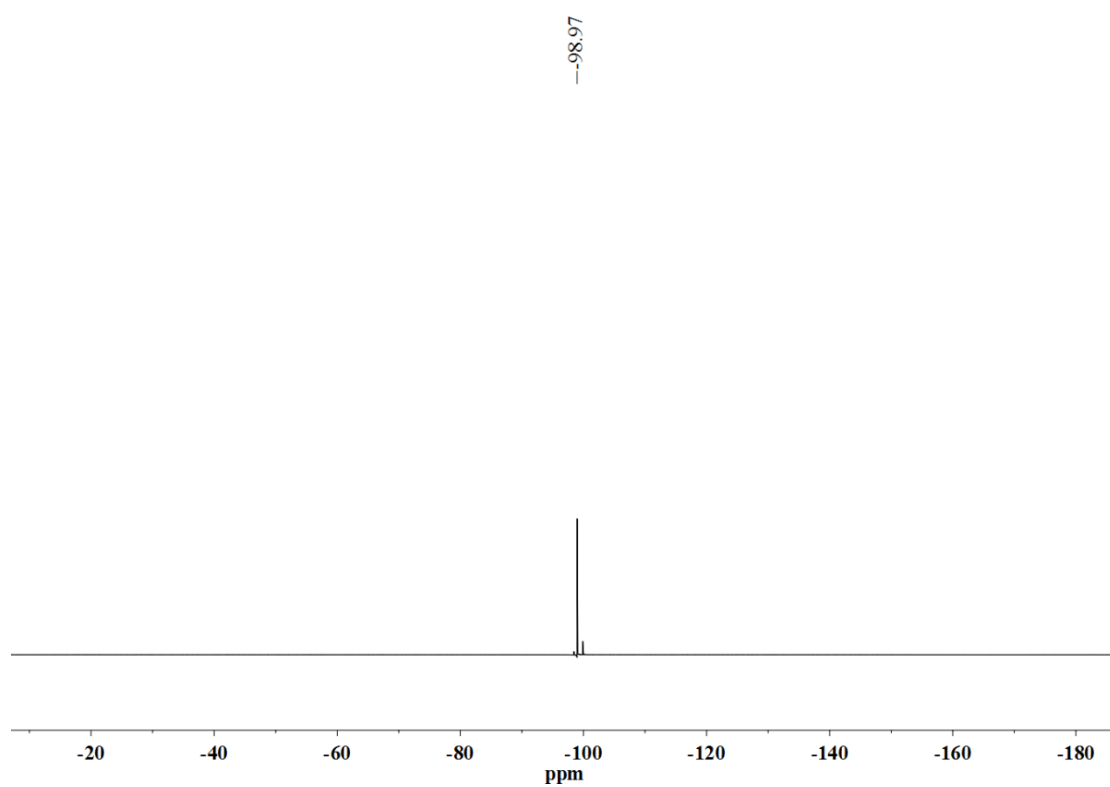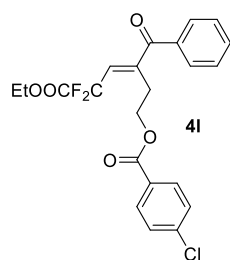

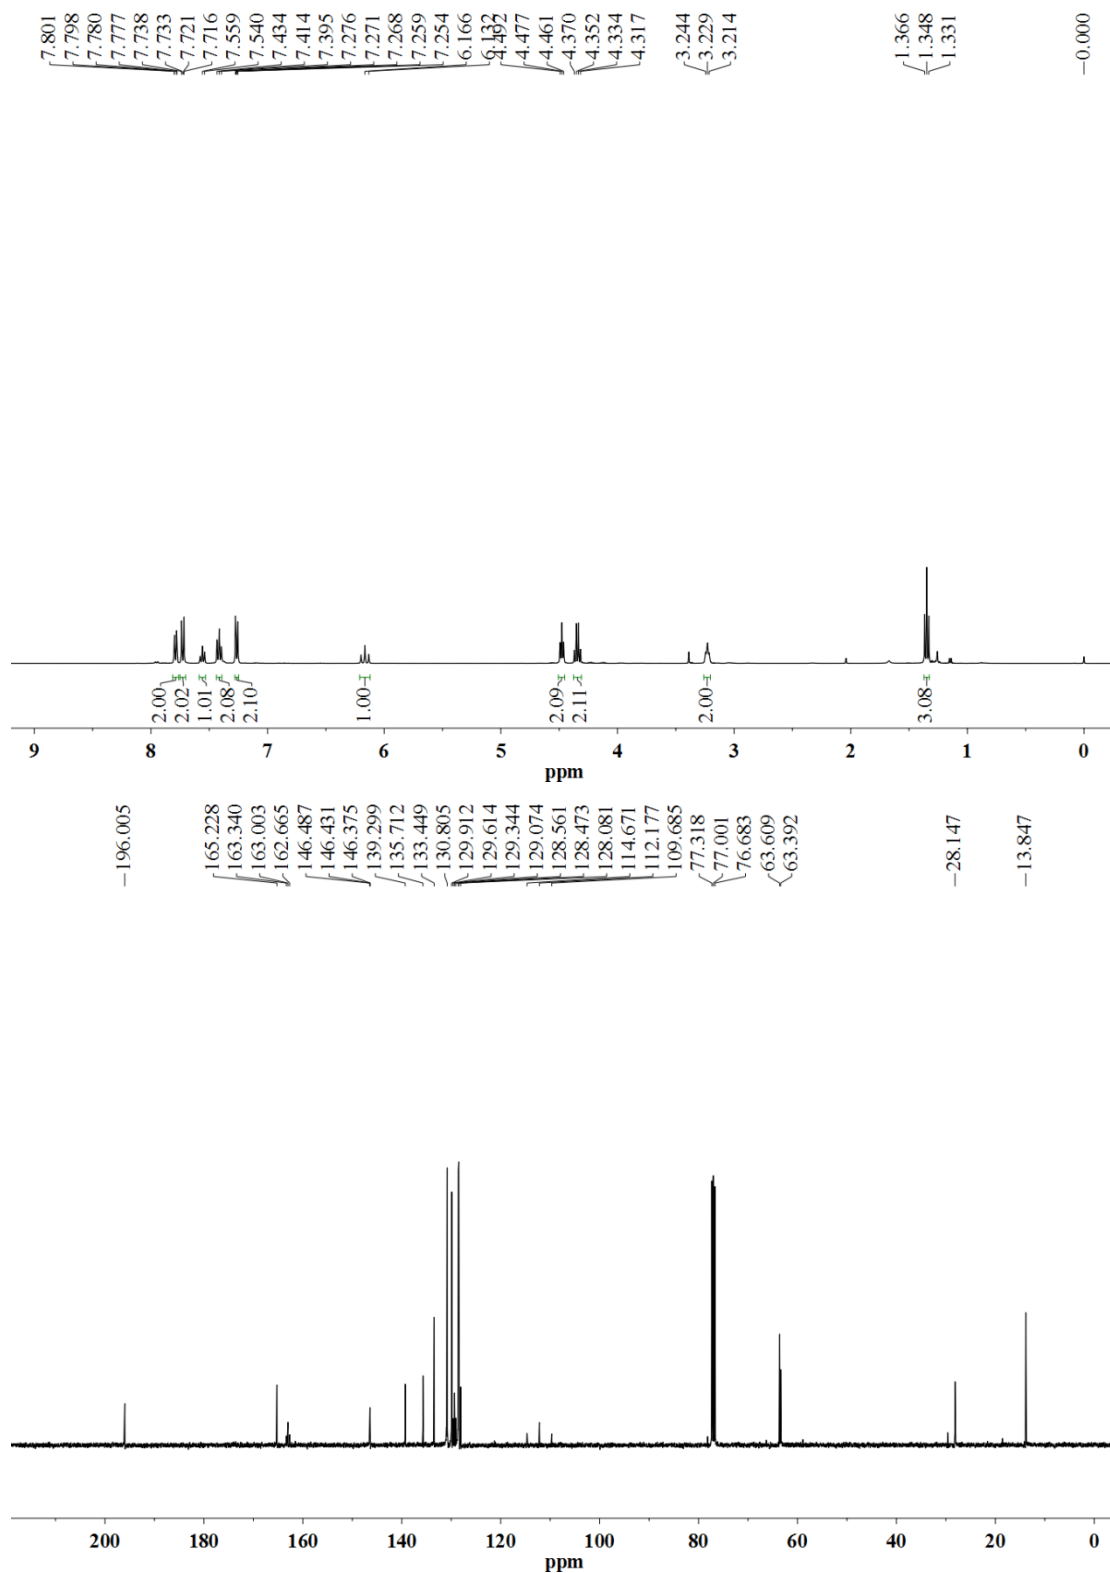

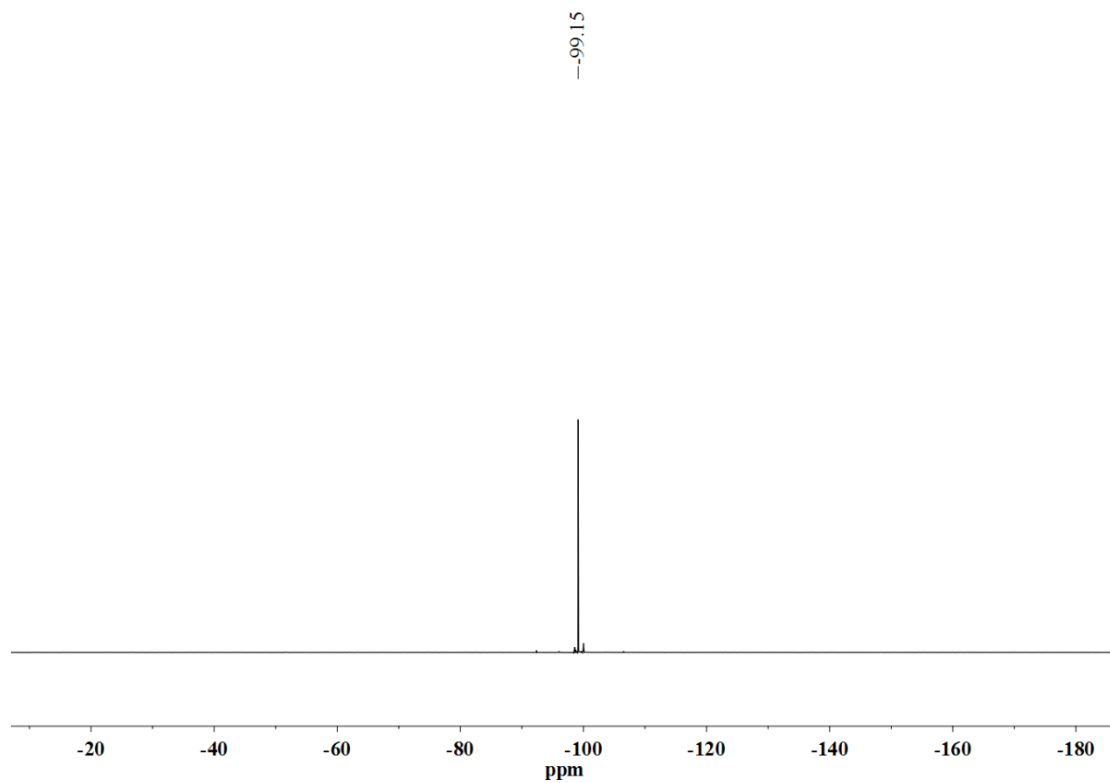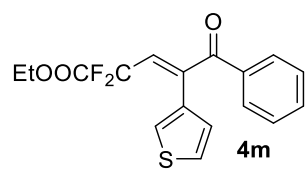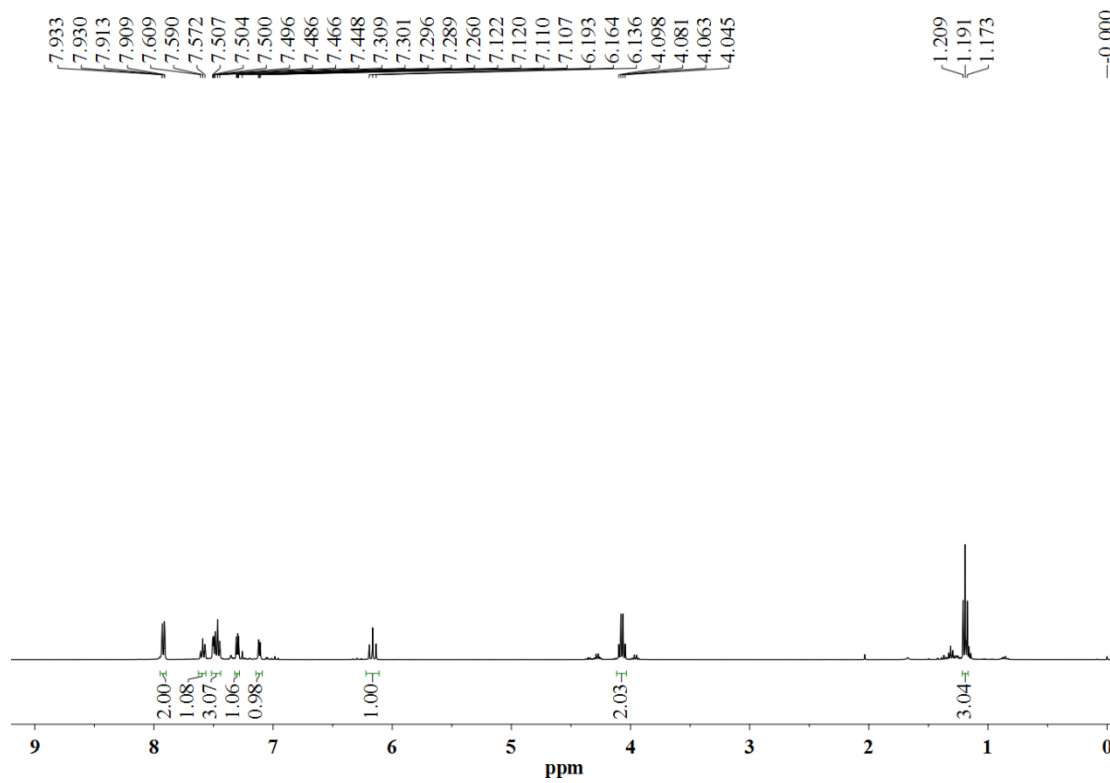



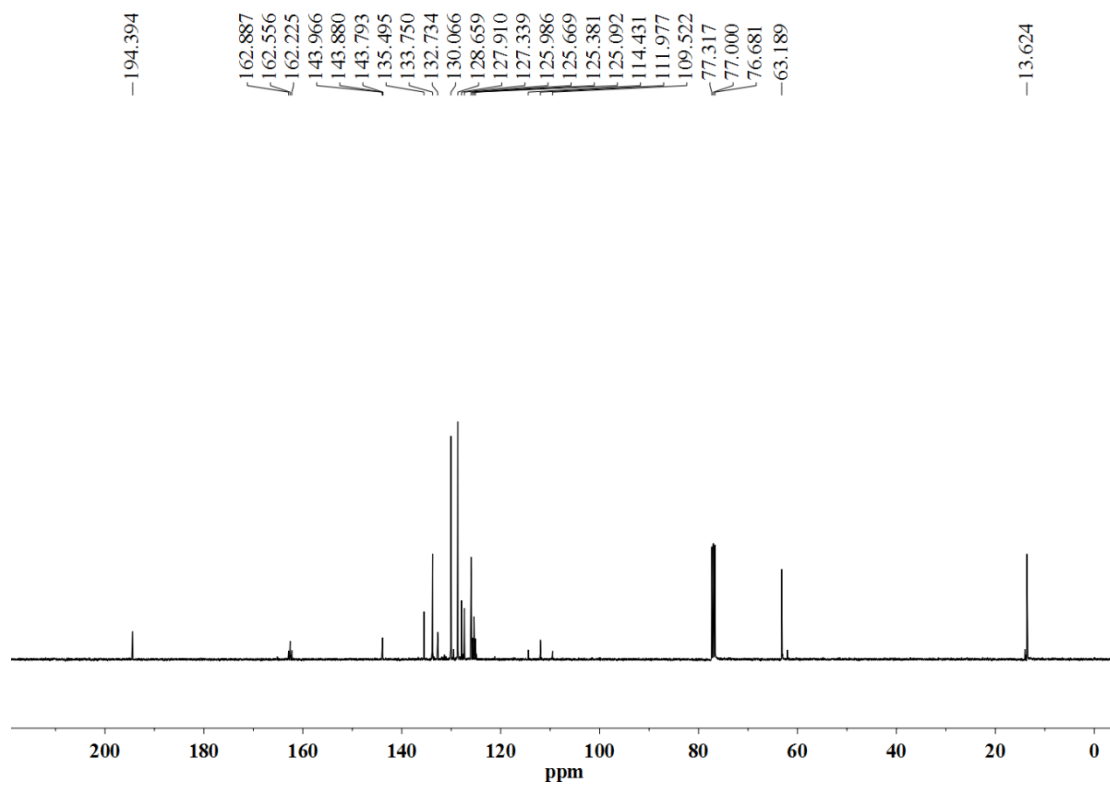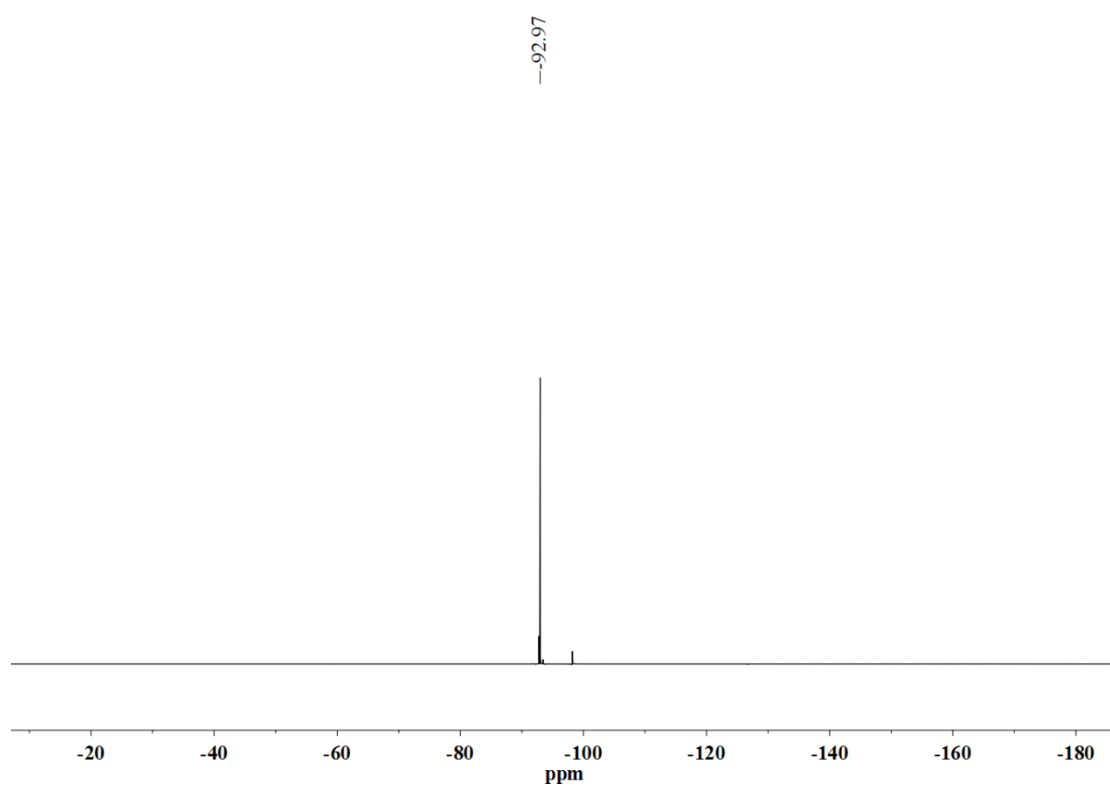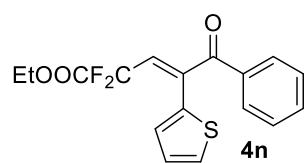

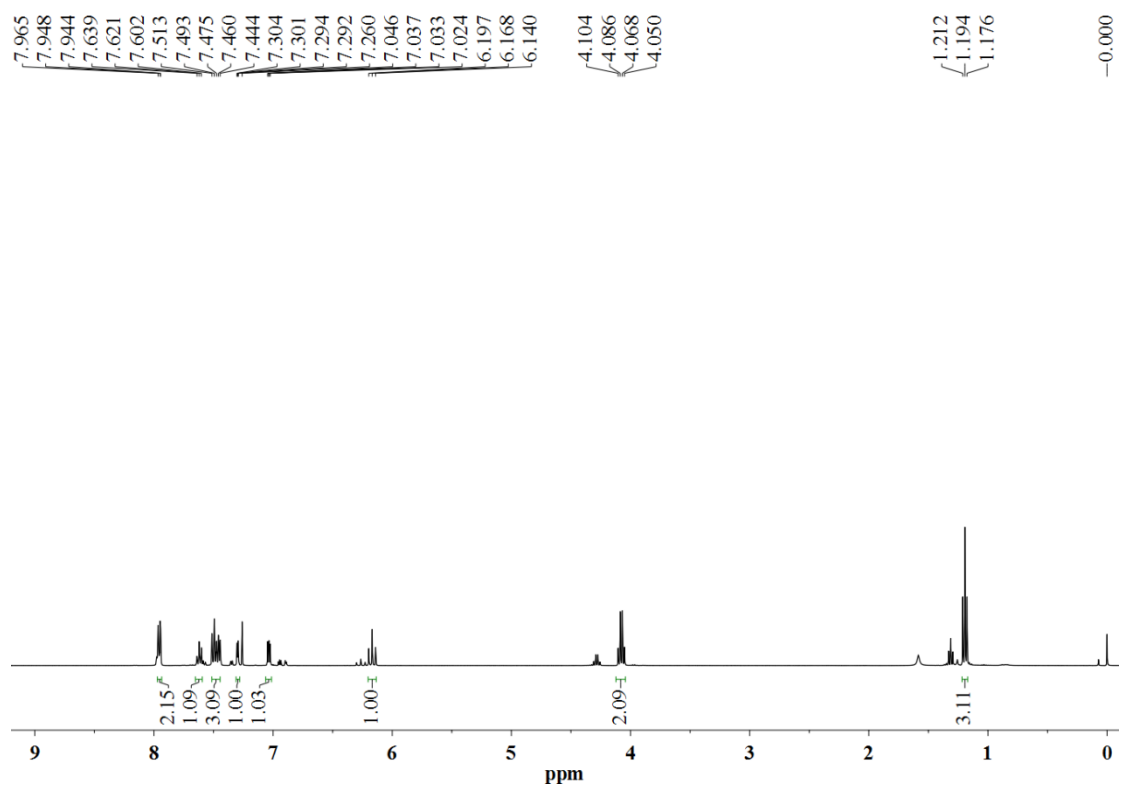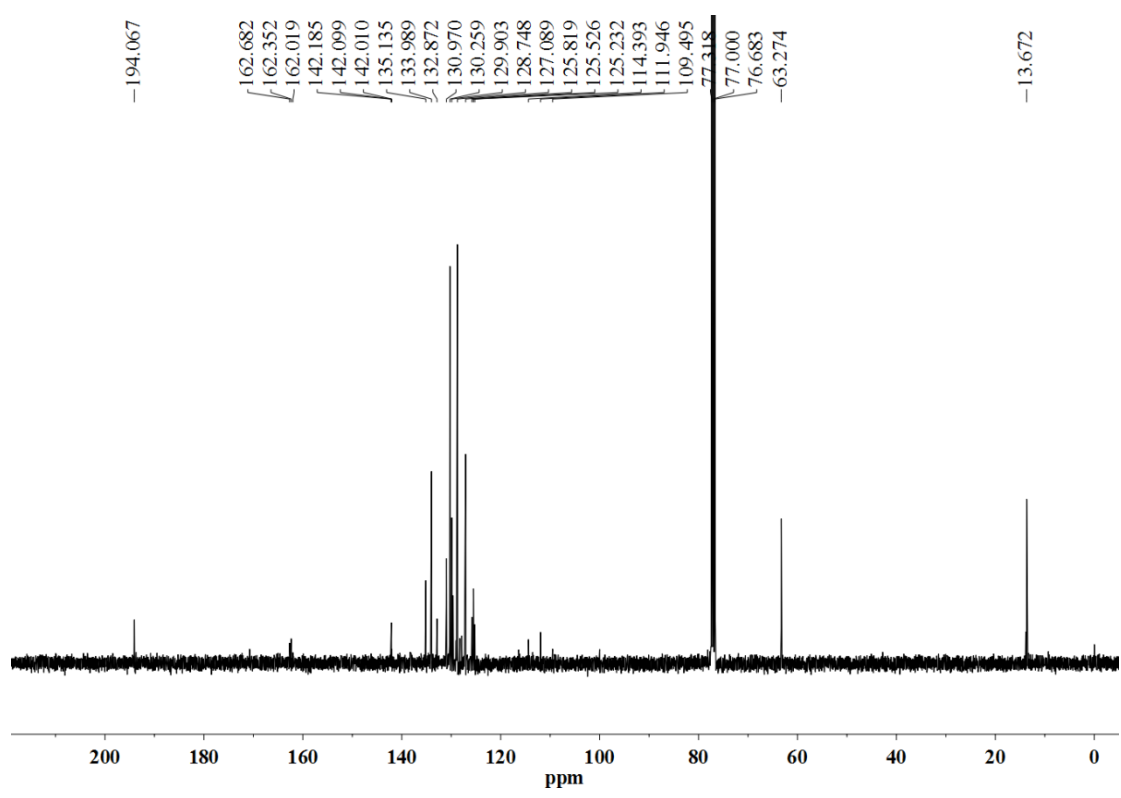

--91.79

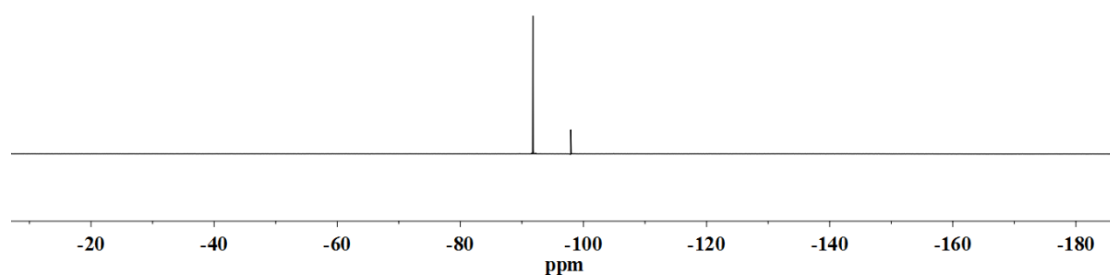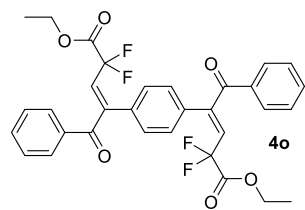

7.916  
7.898  
7.895  
7.612  
7.593  
7.575  
7.494  
7.475  
7.456  
7.376  
7.262  
6.281  
6.252  
6.223

3.986  
3.968  
3.950  
3.933

1.177  
1.159  
1.141

-0.000

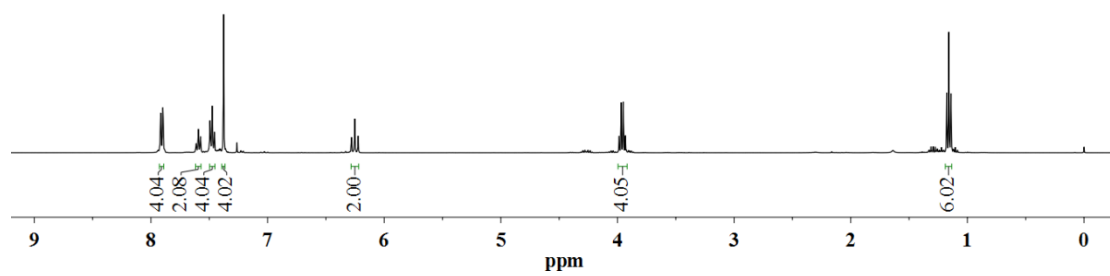

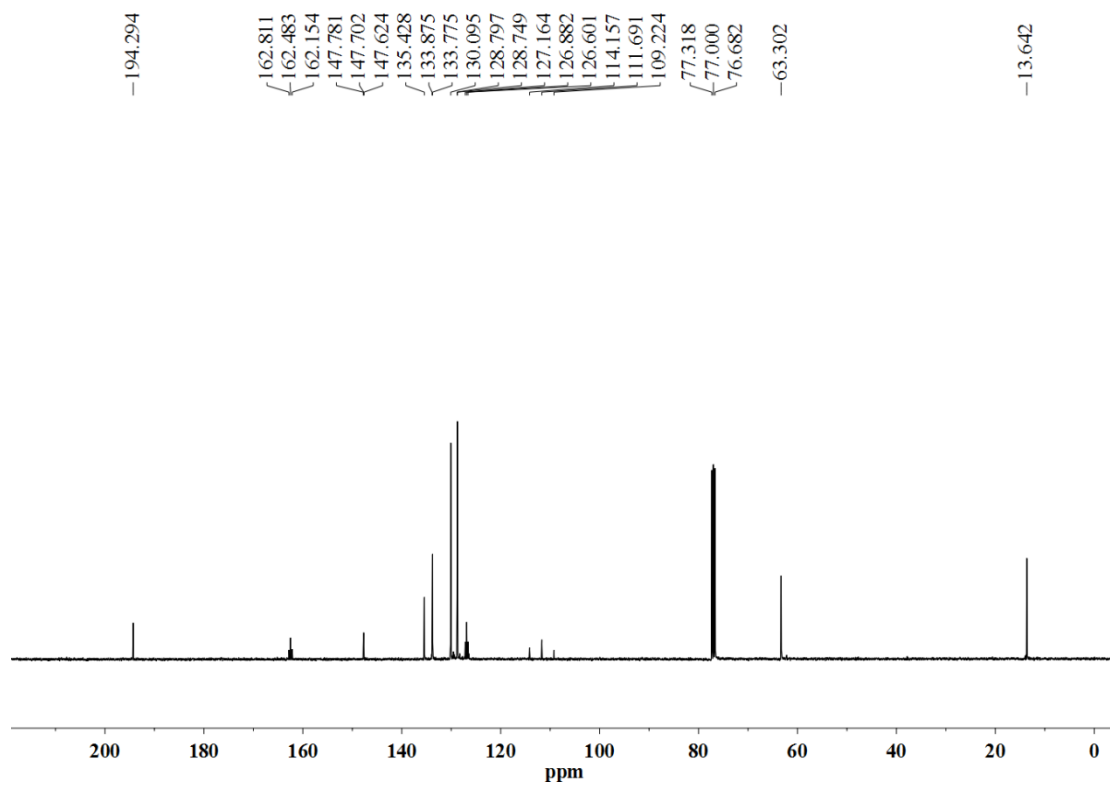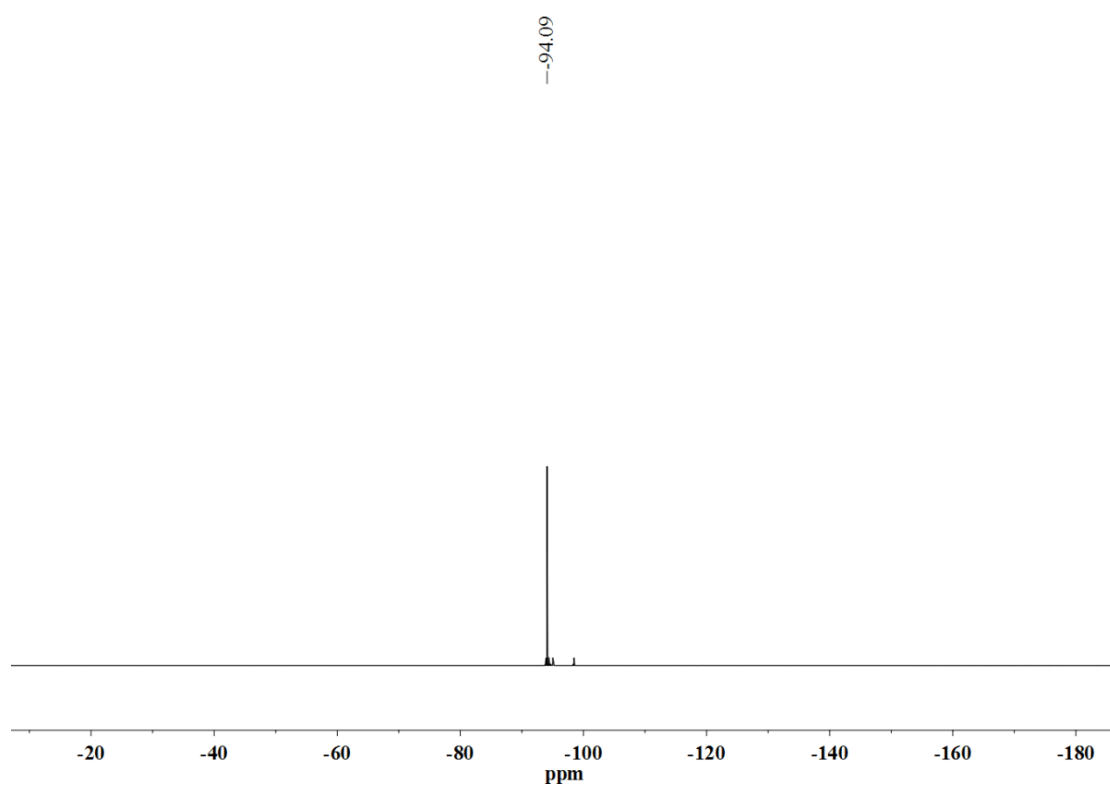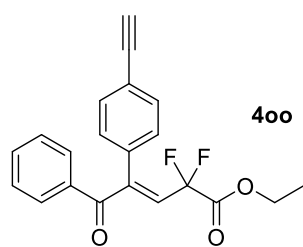

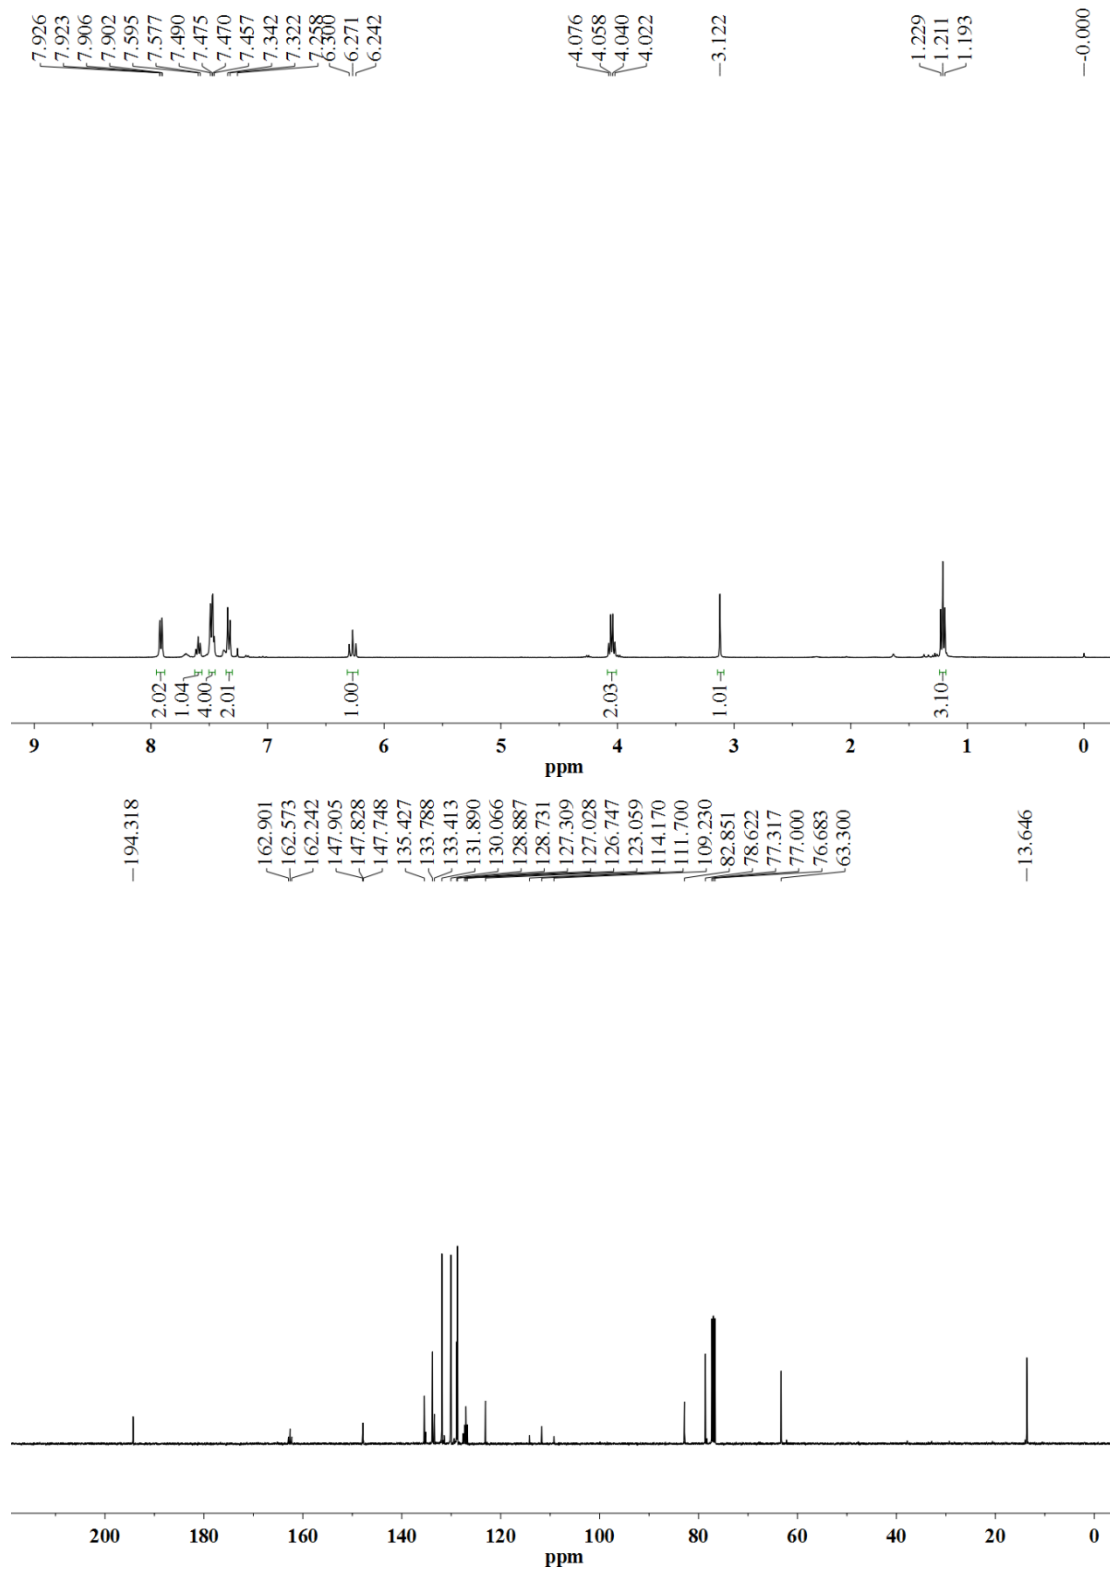

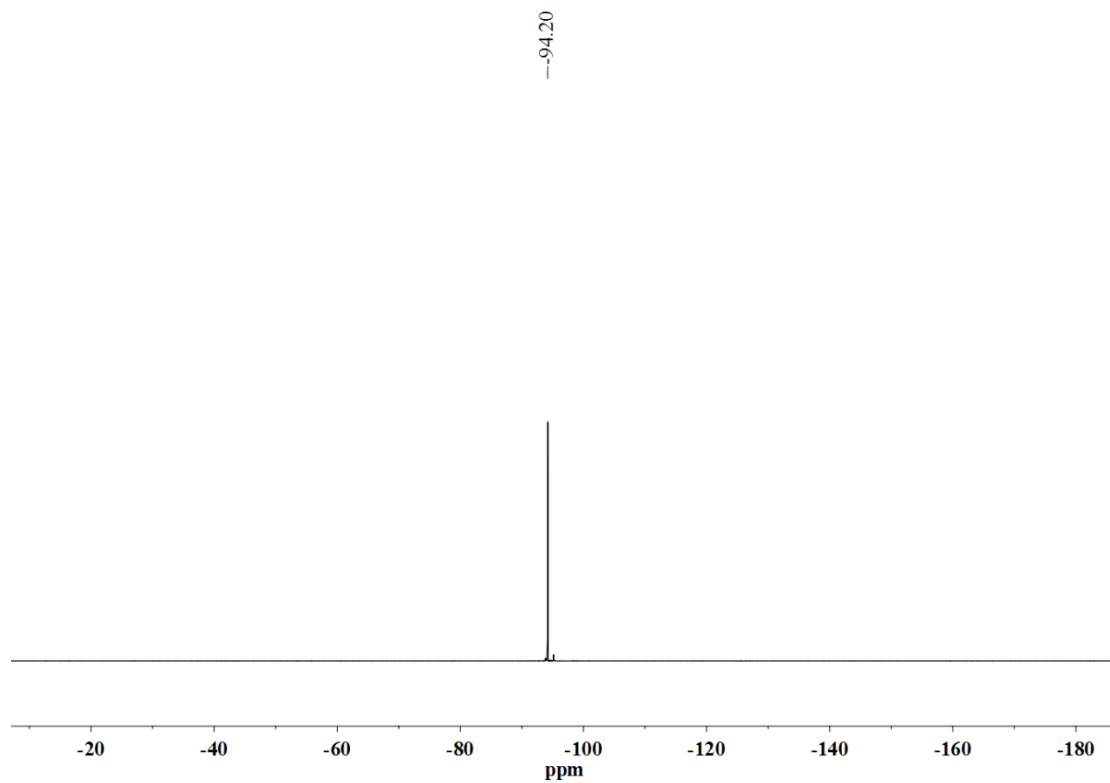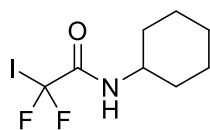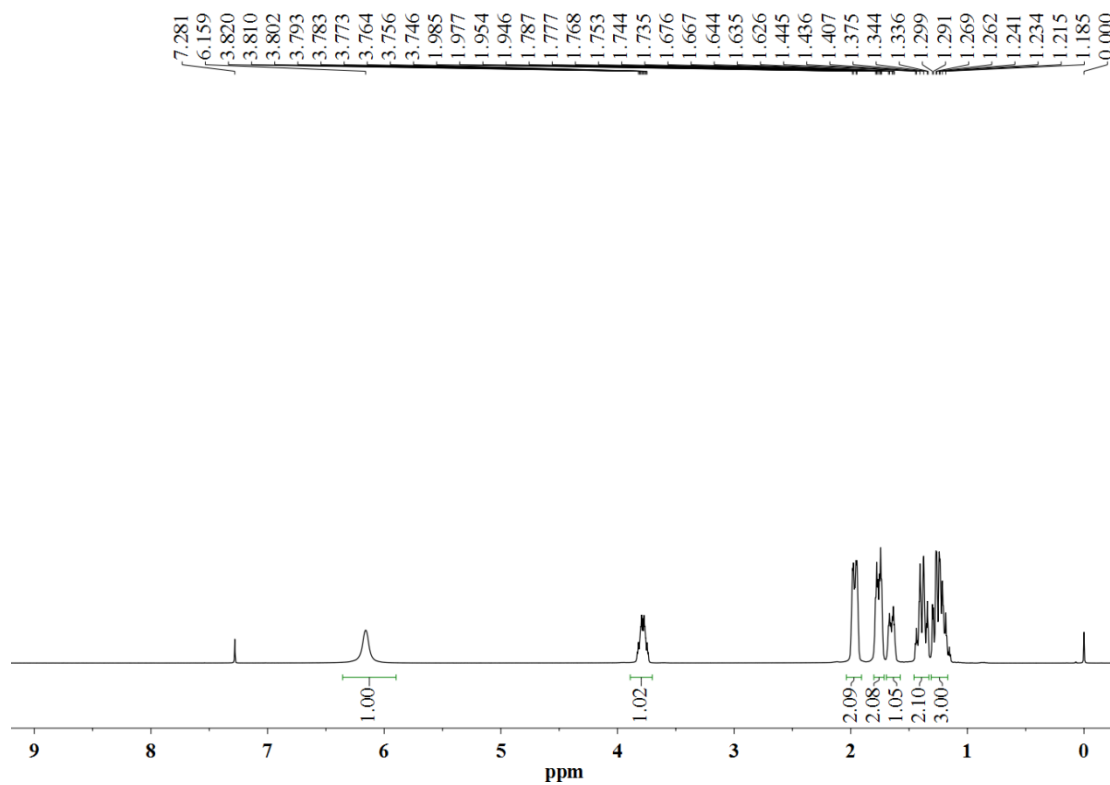

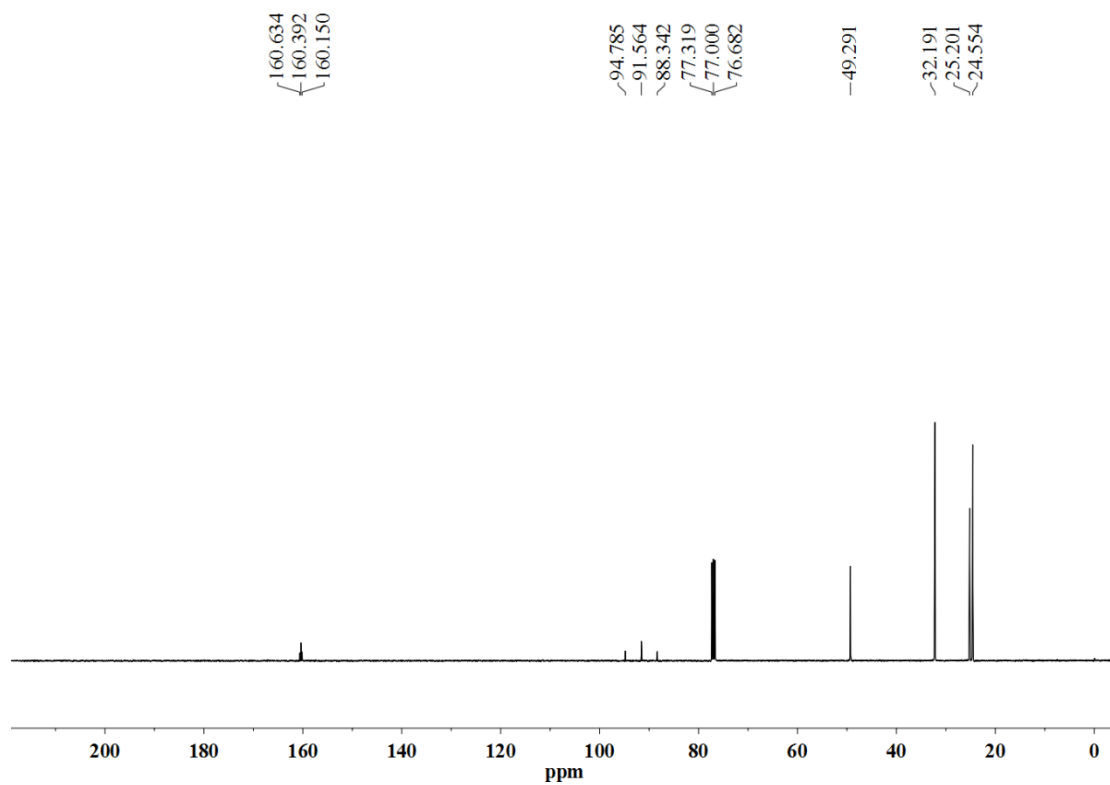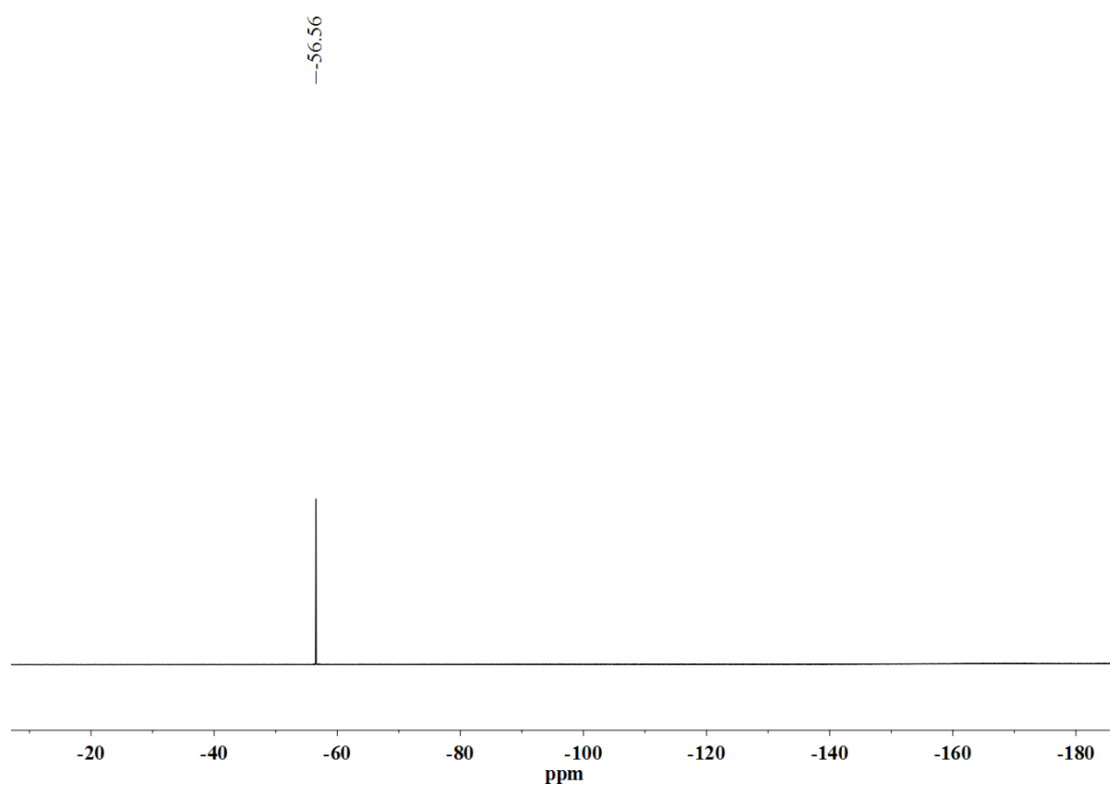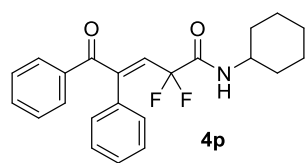

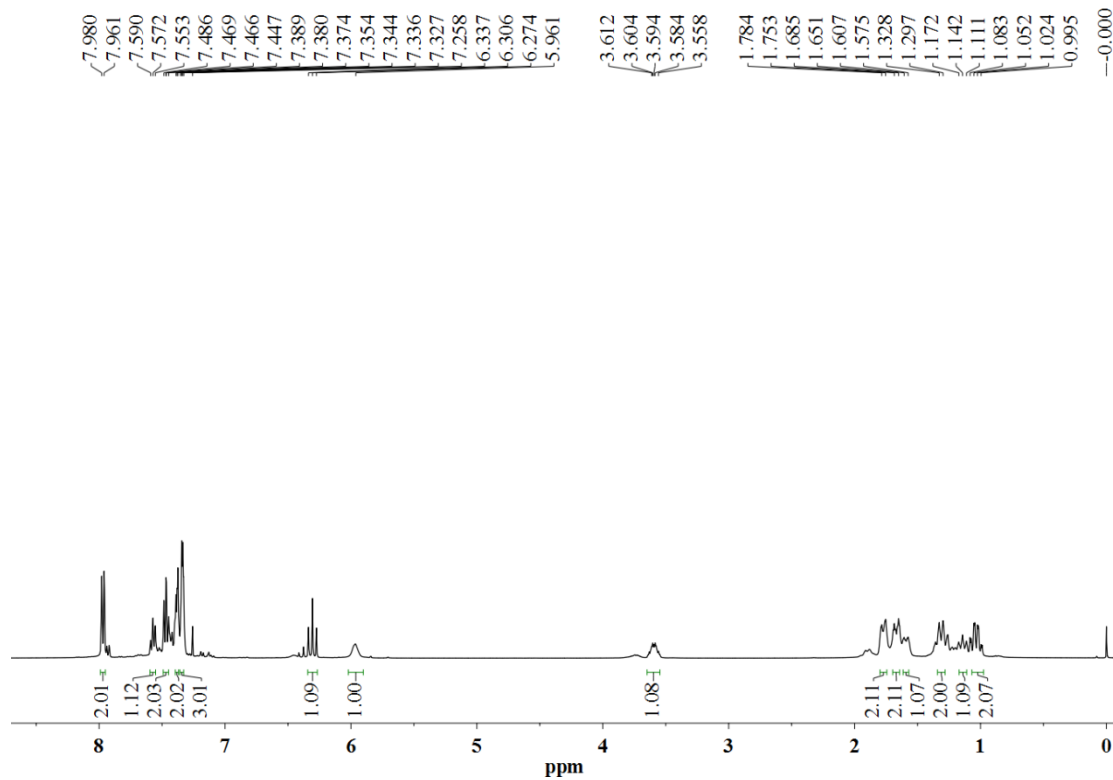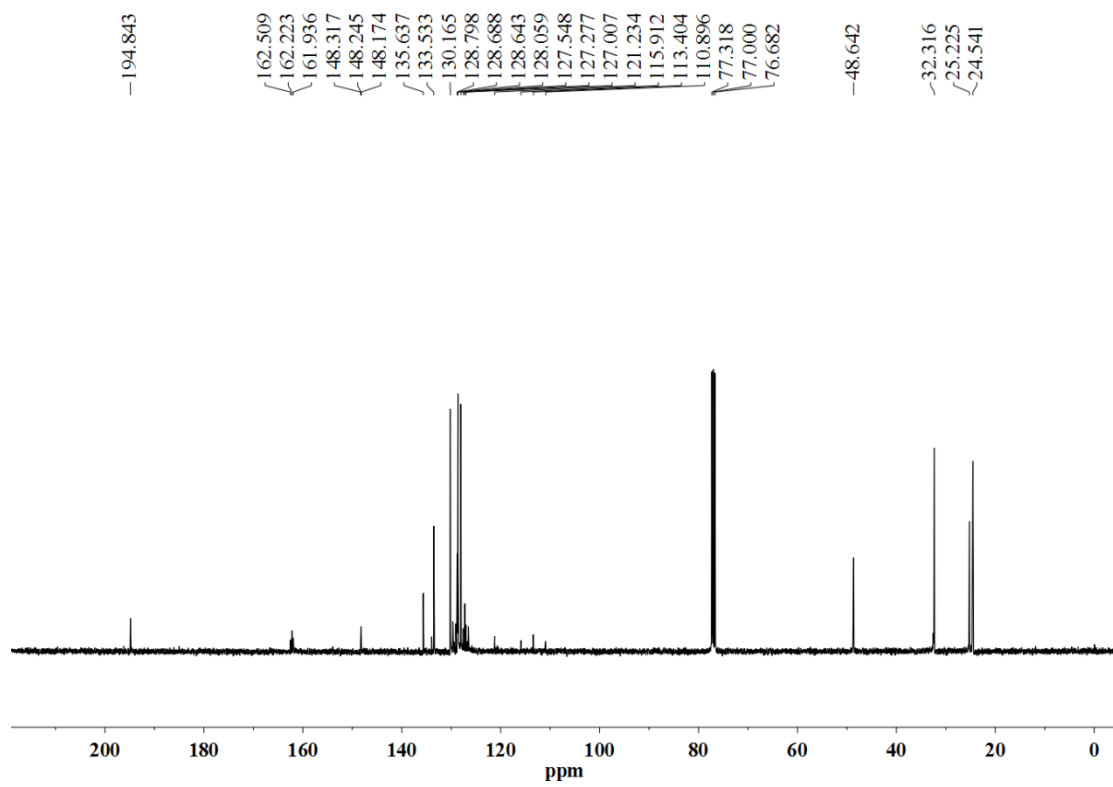



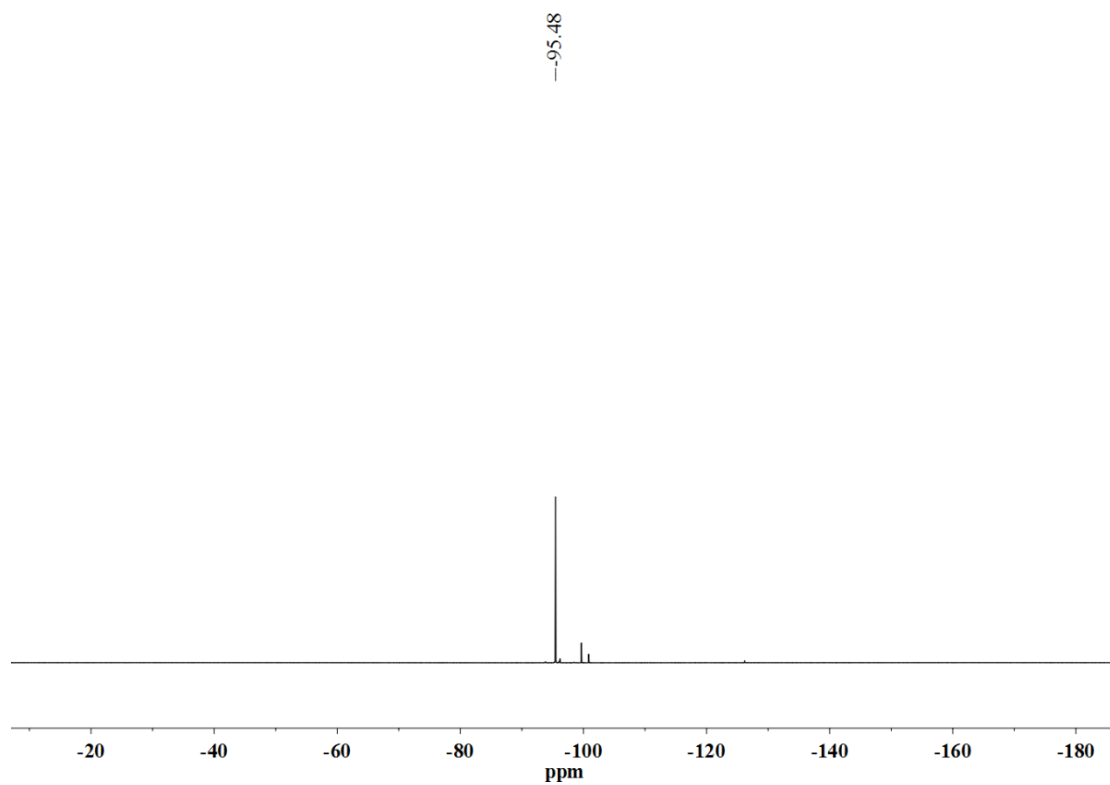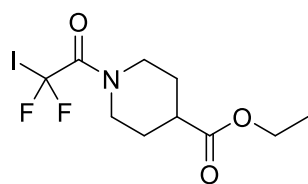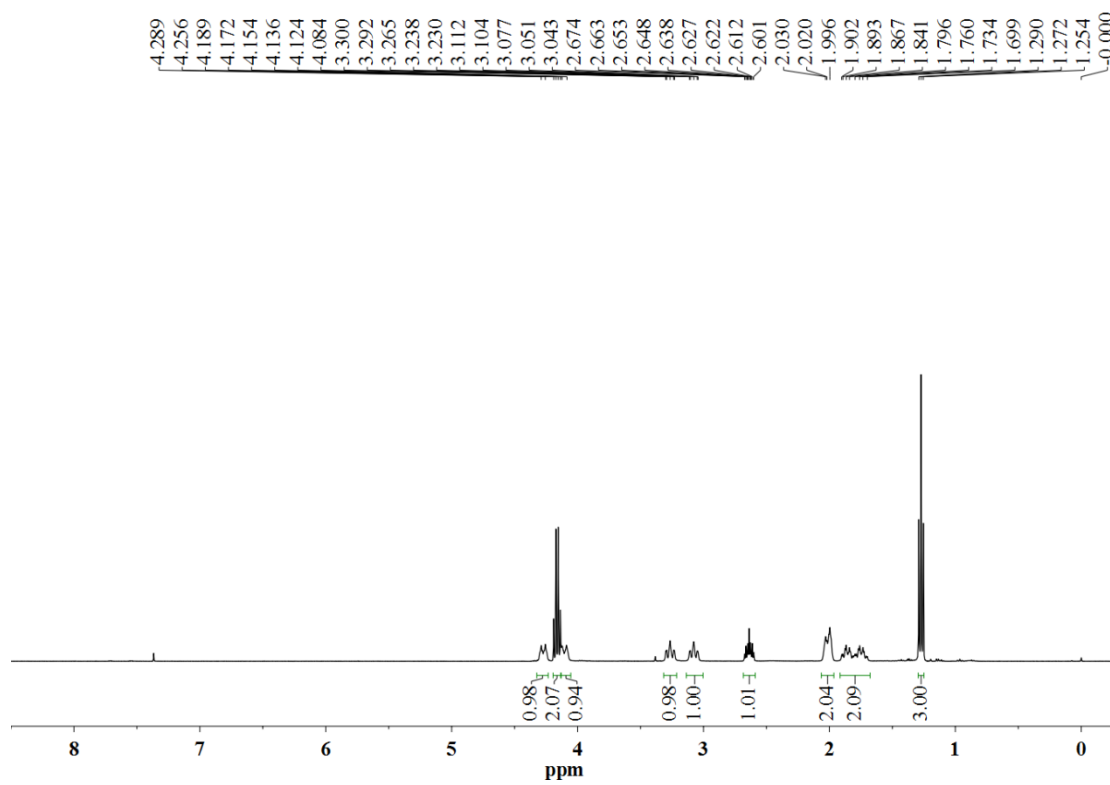

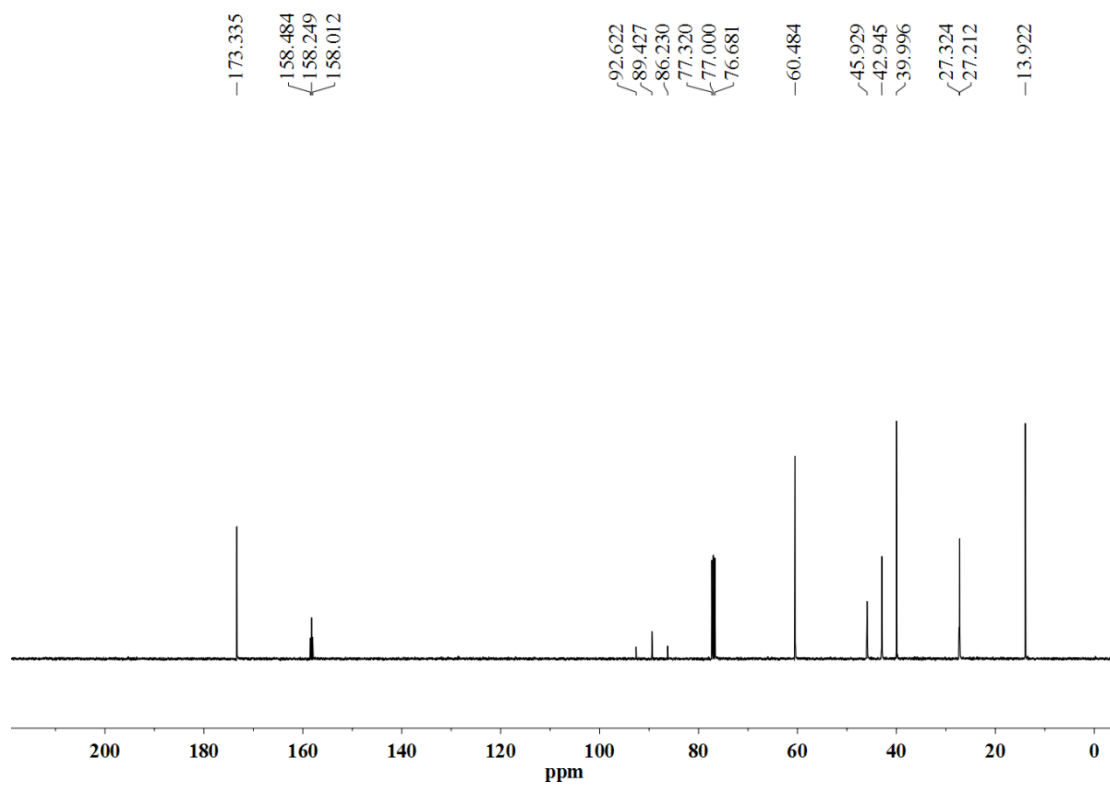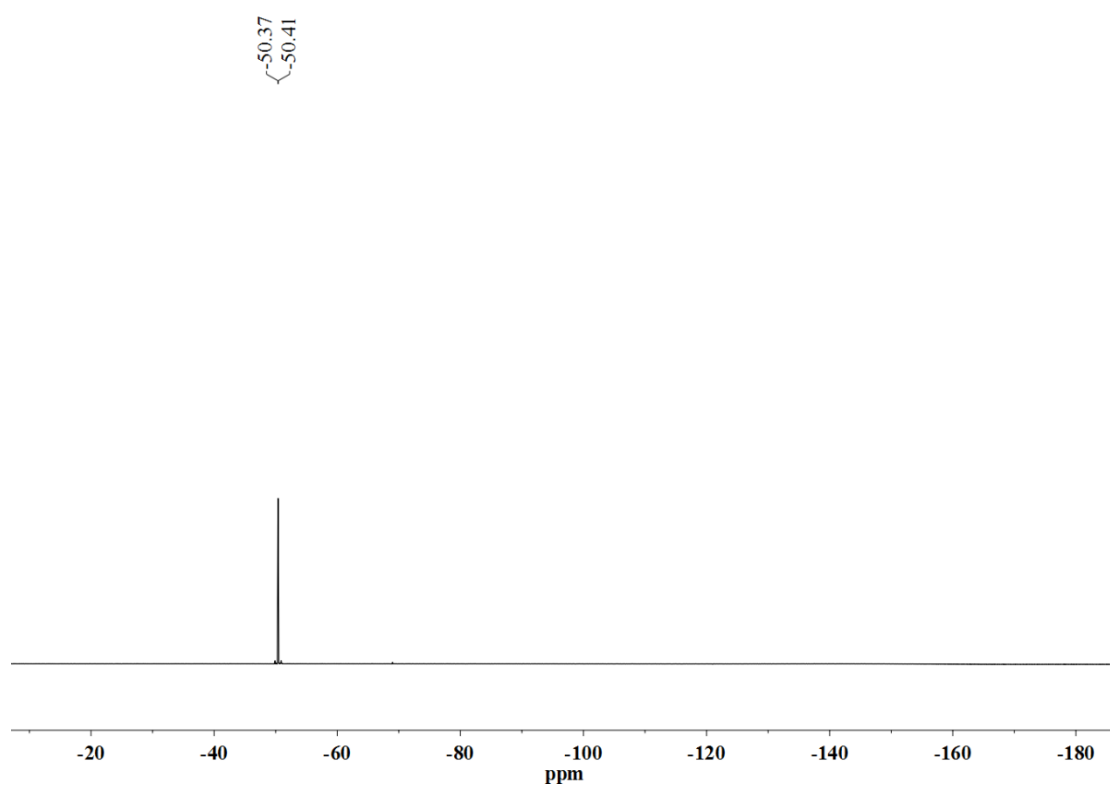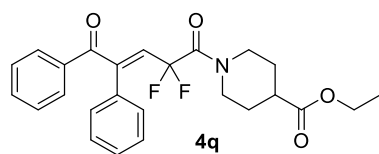

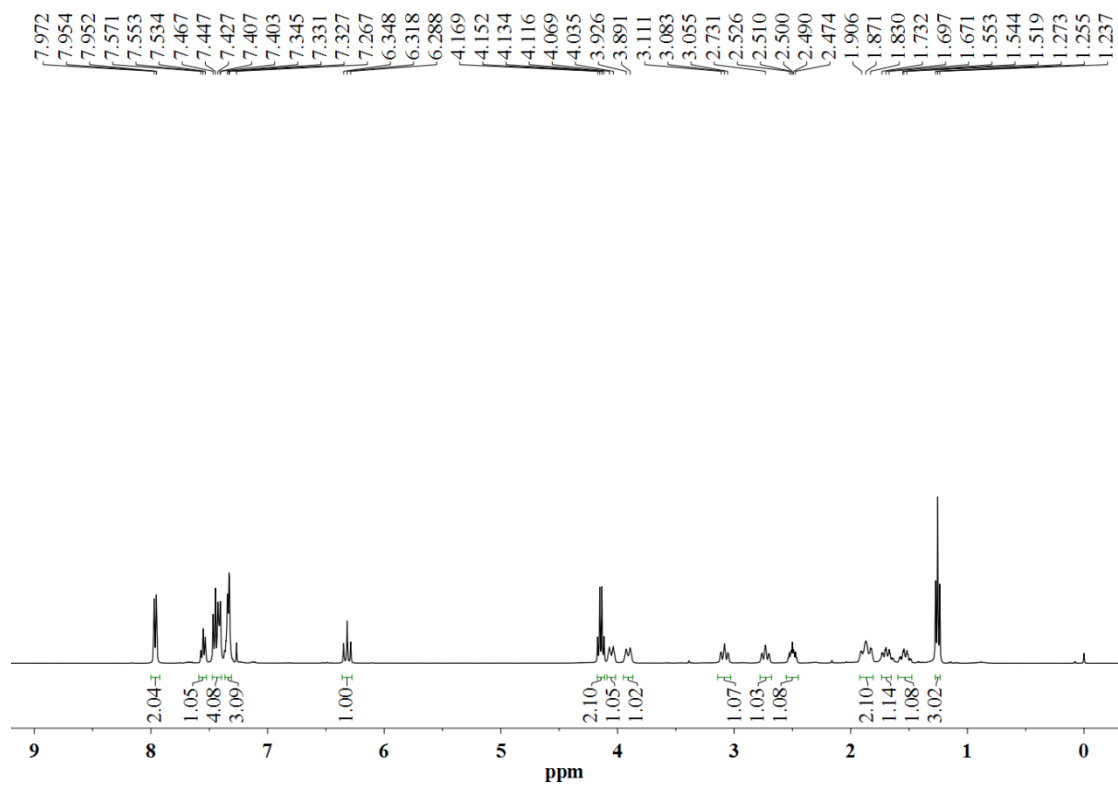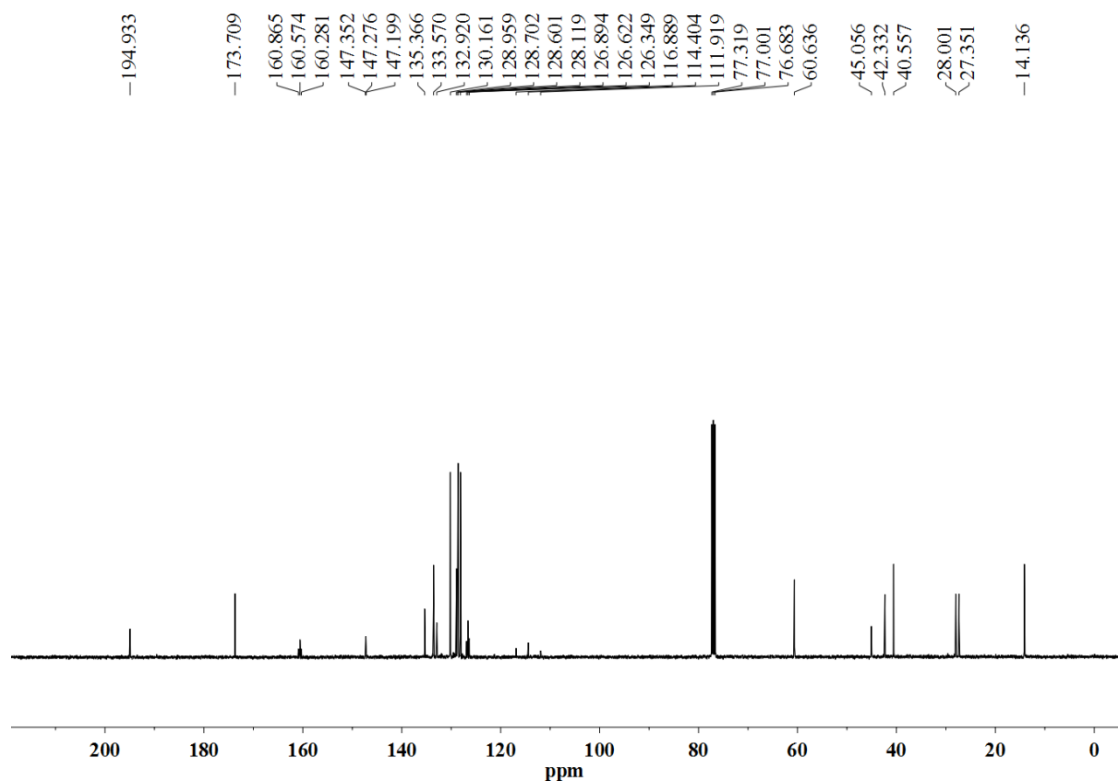

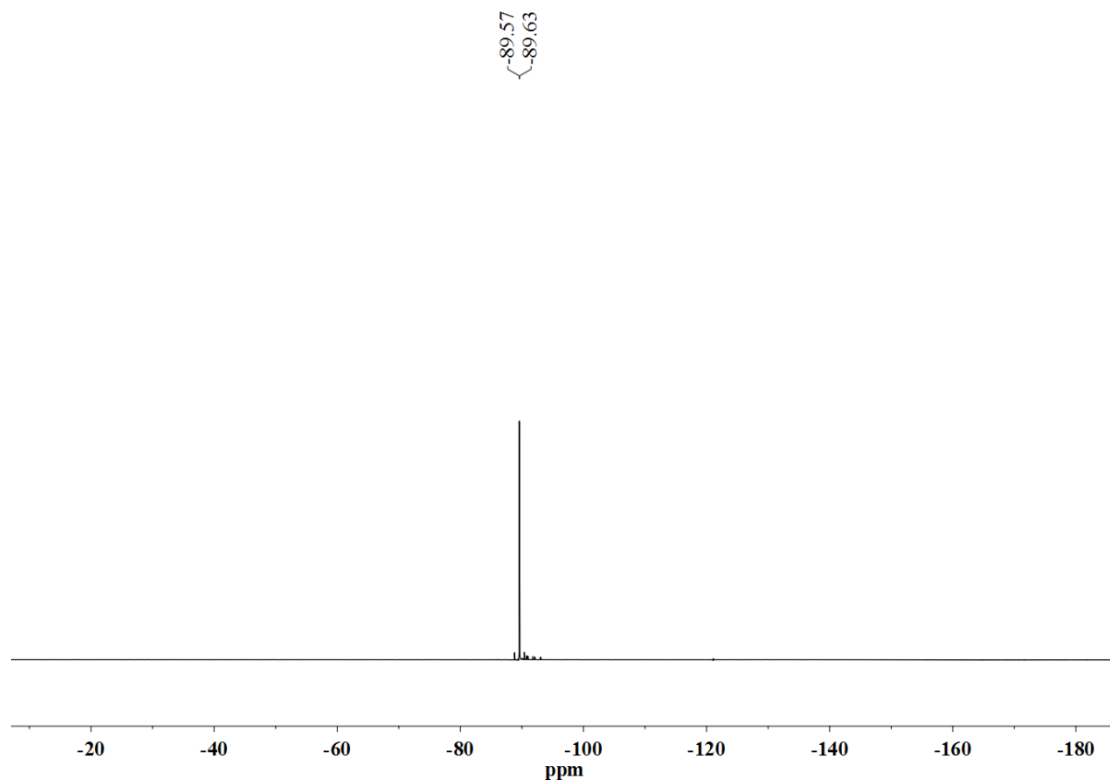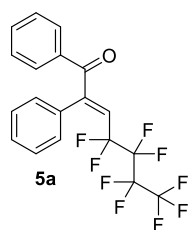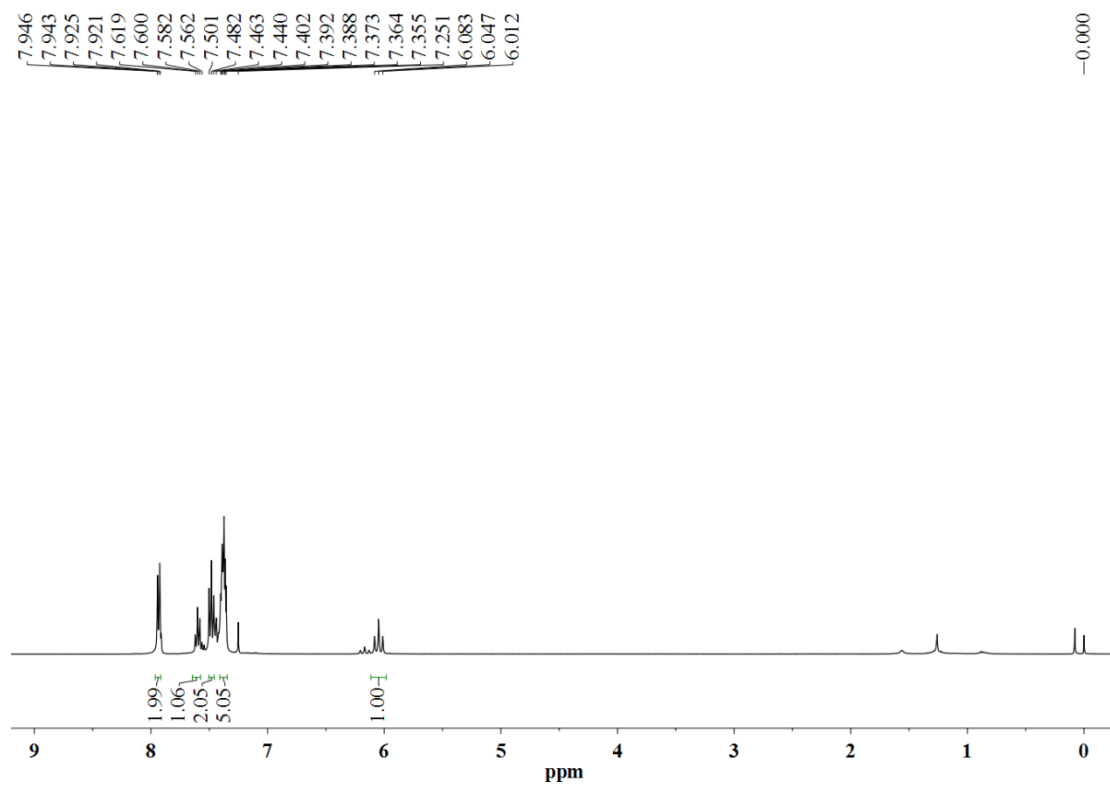

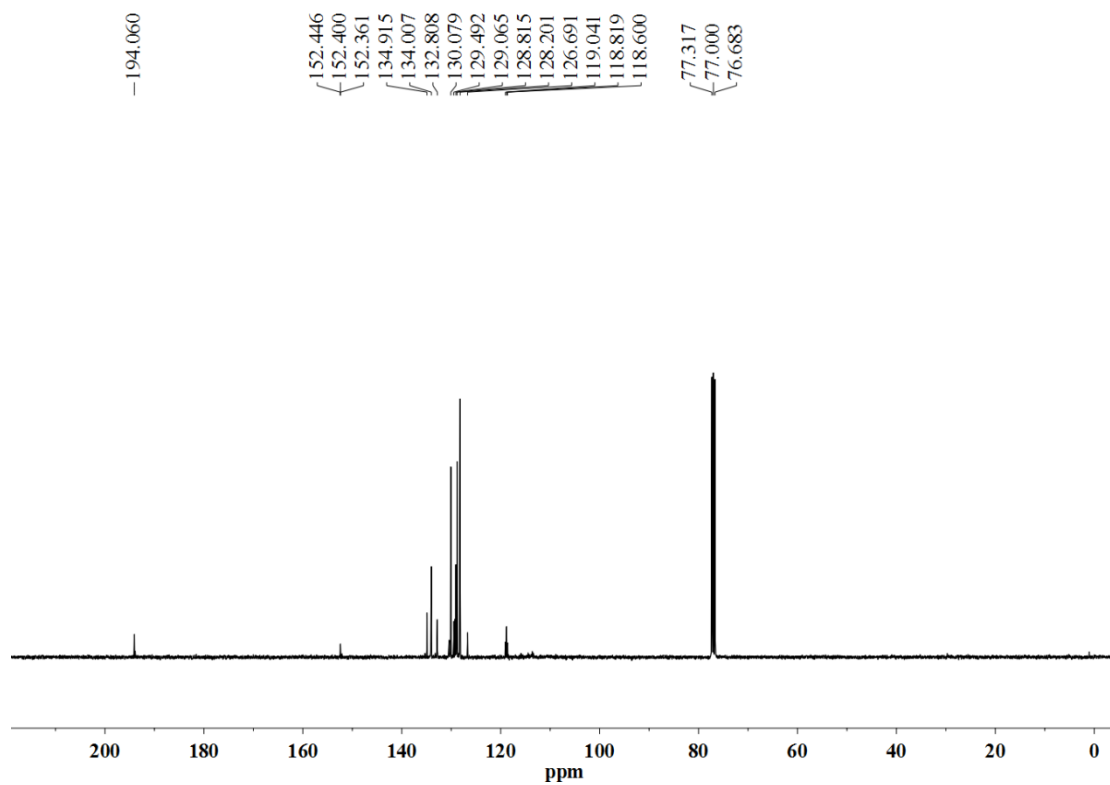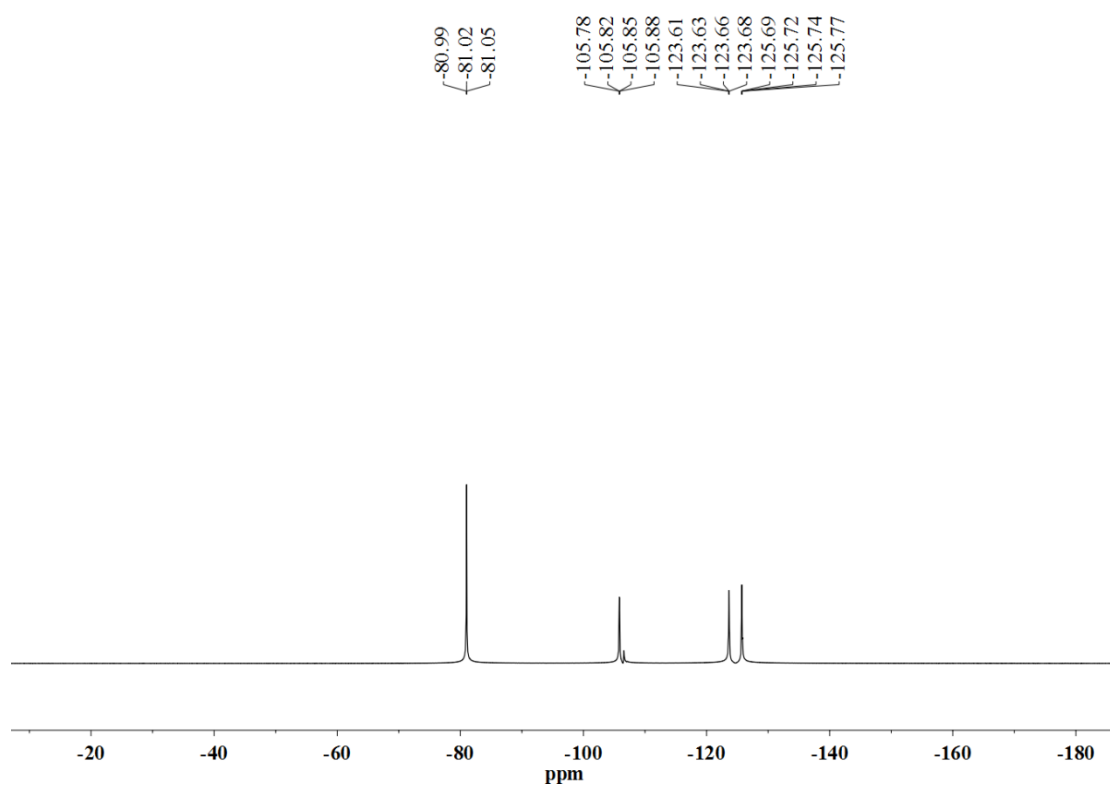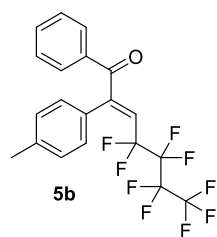

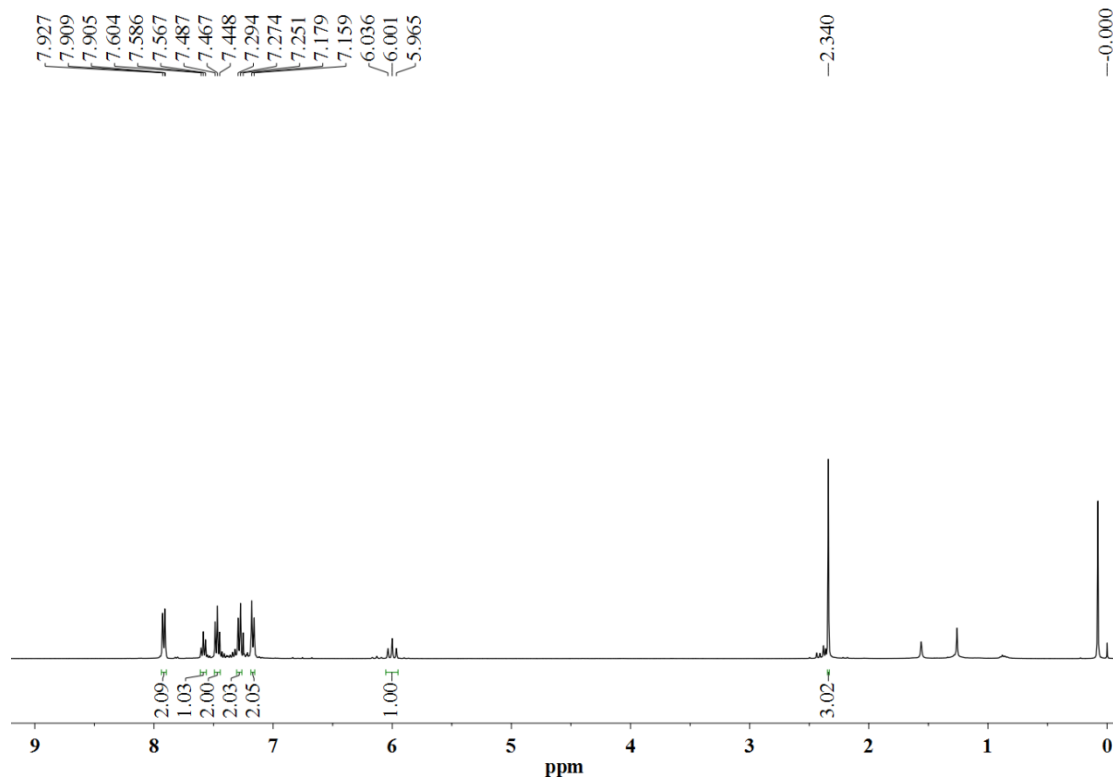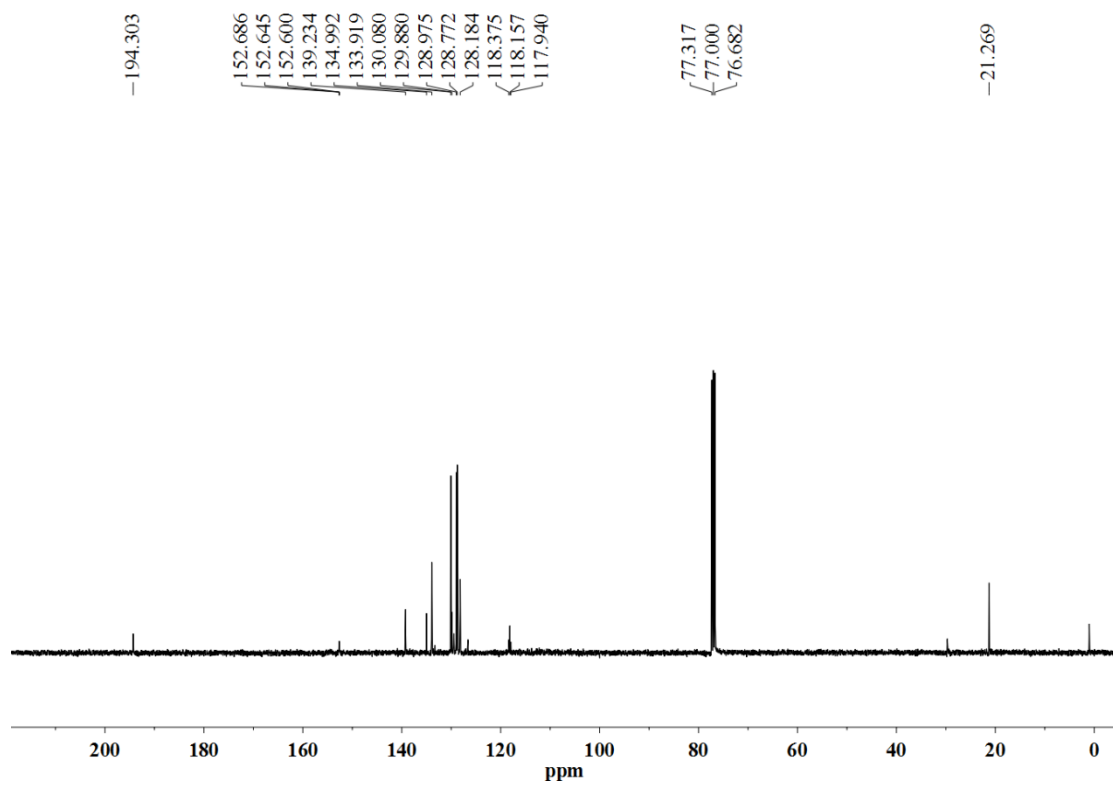

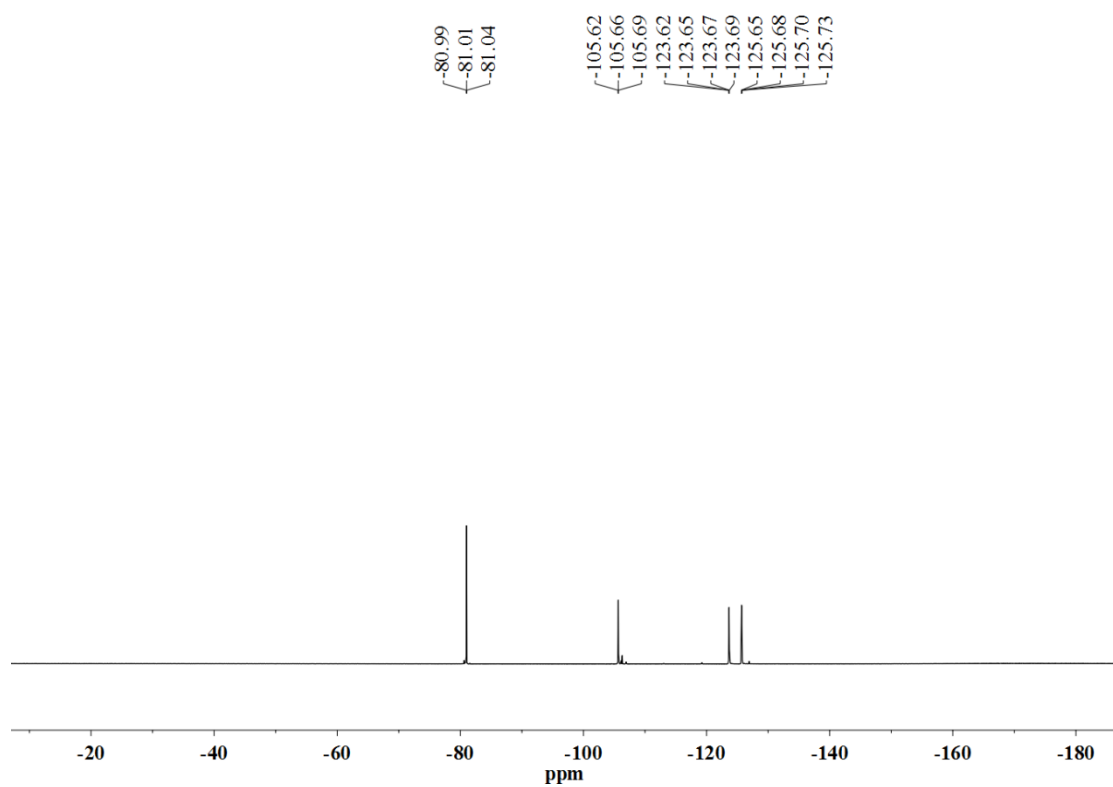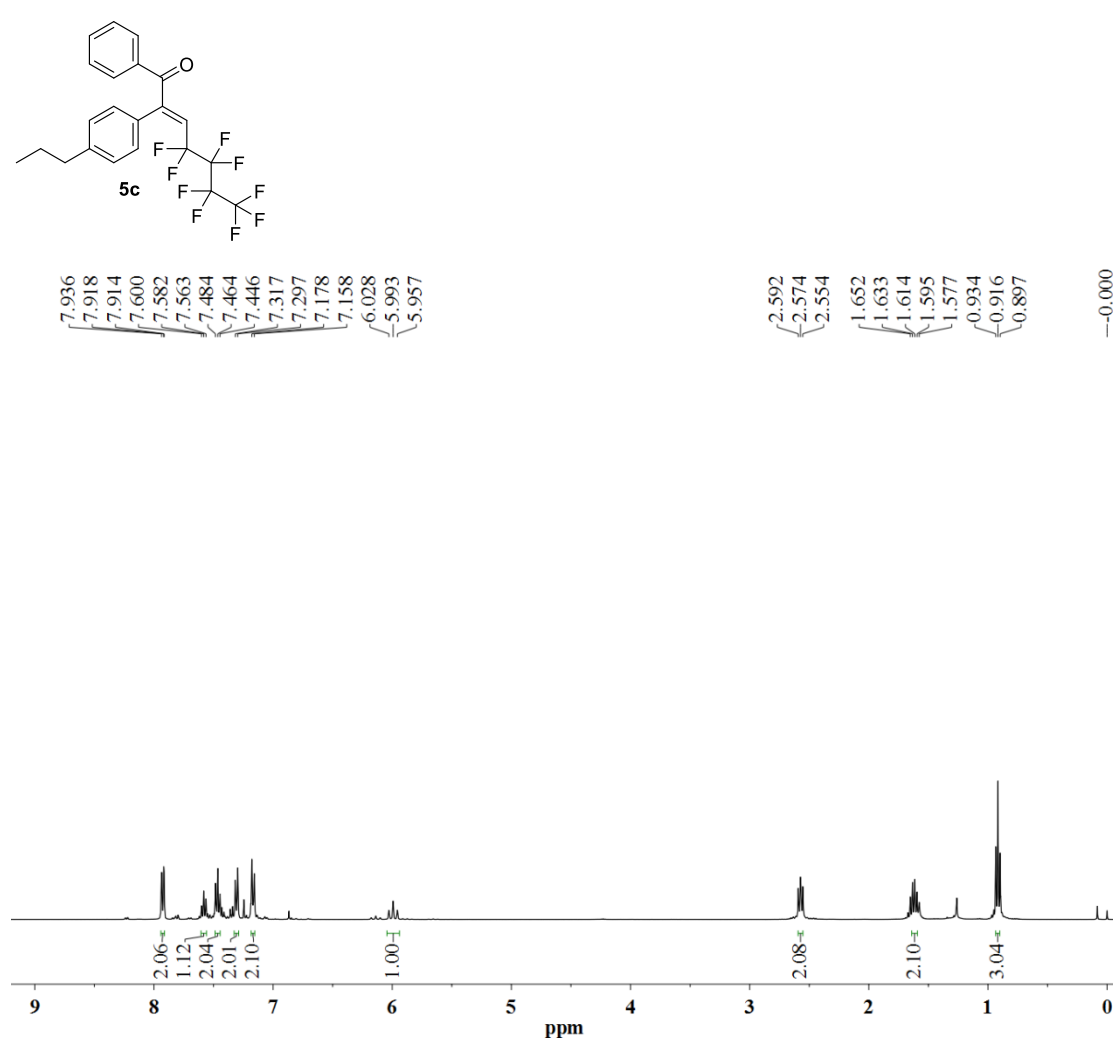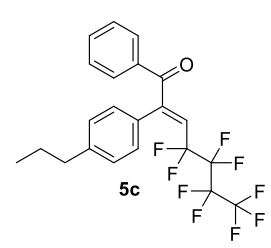

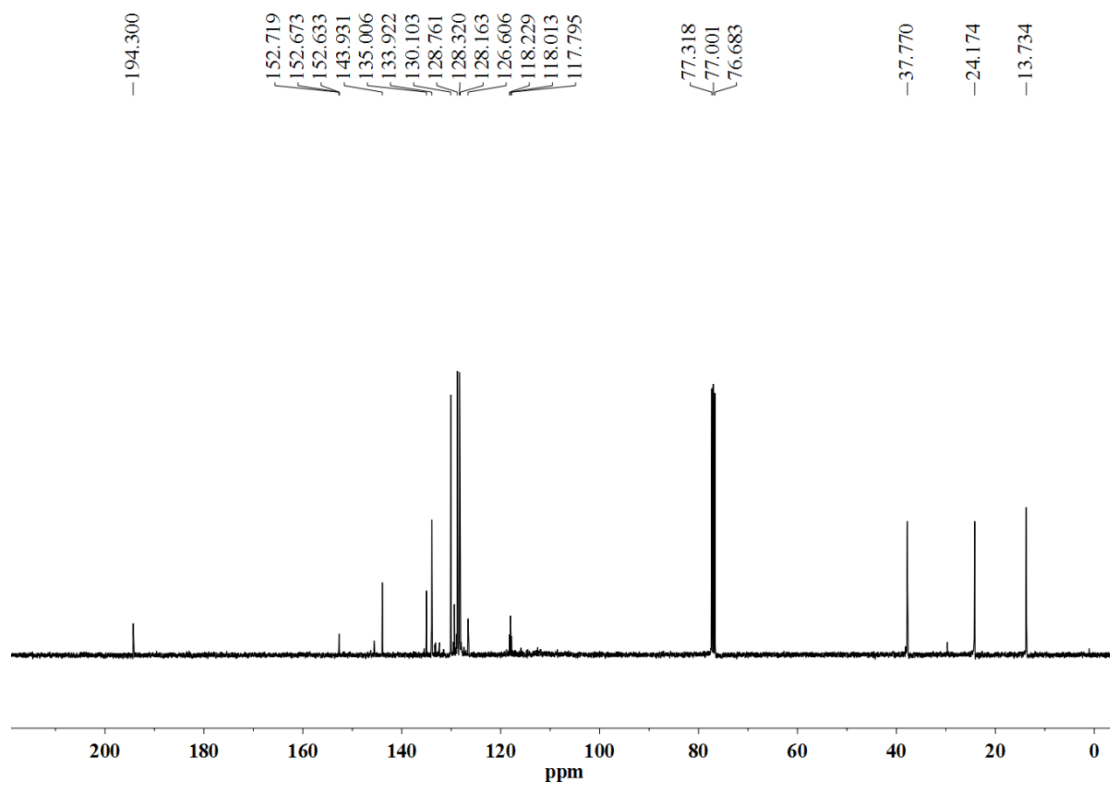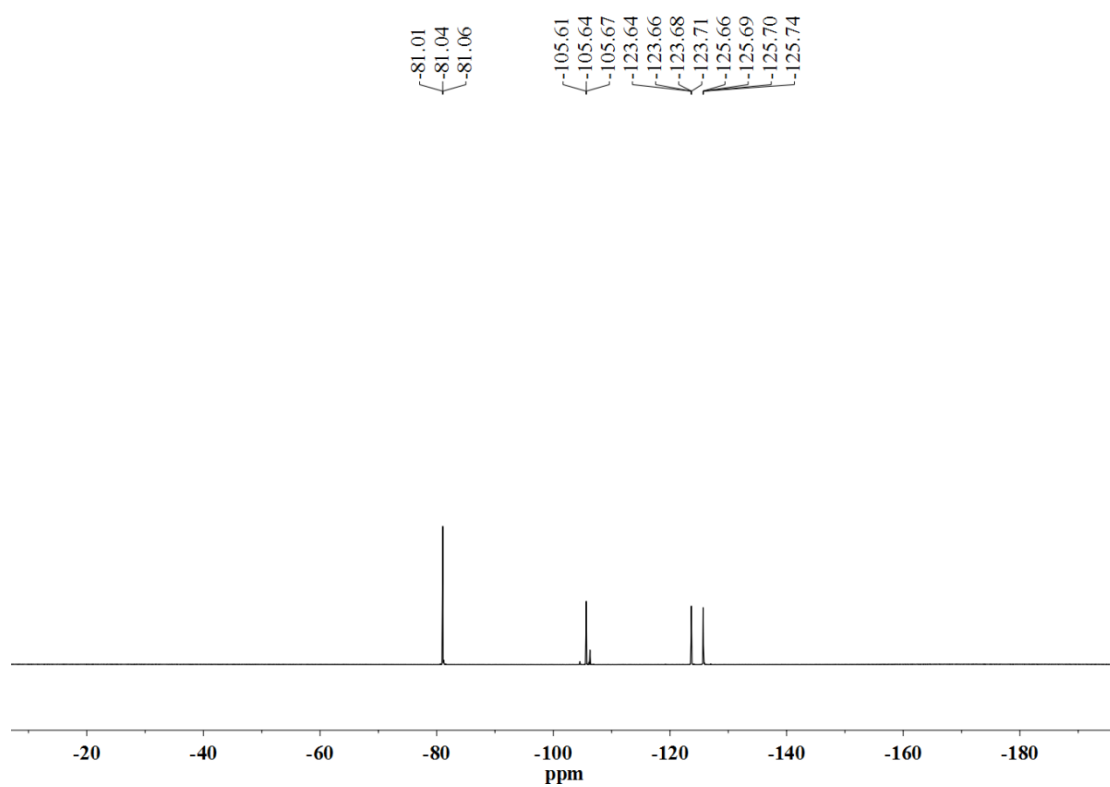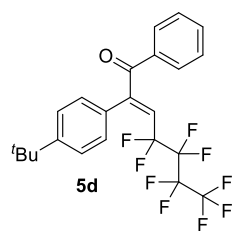



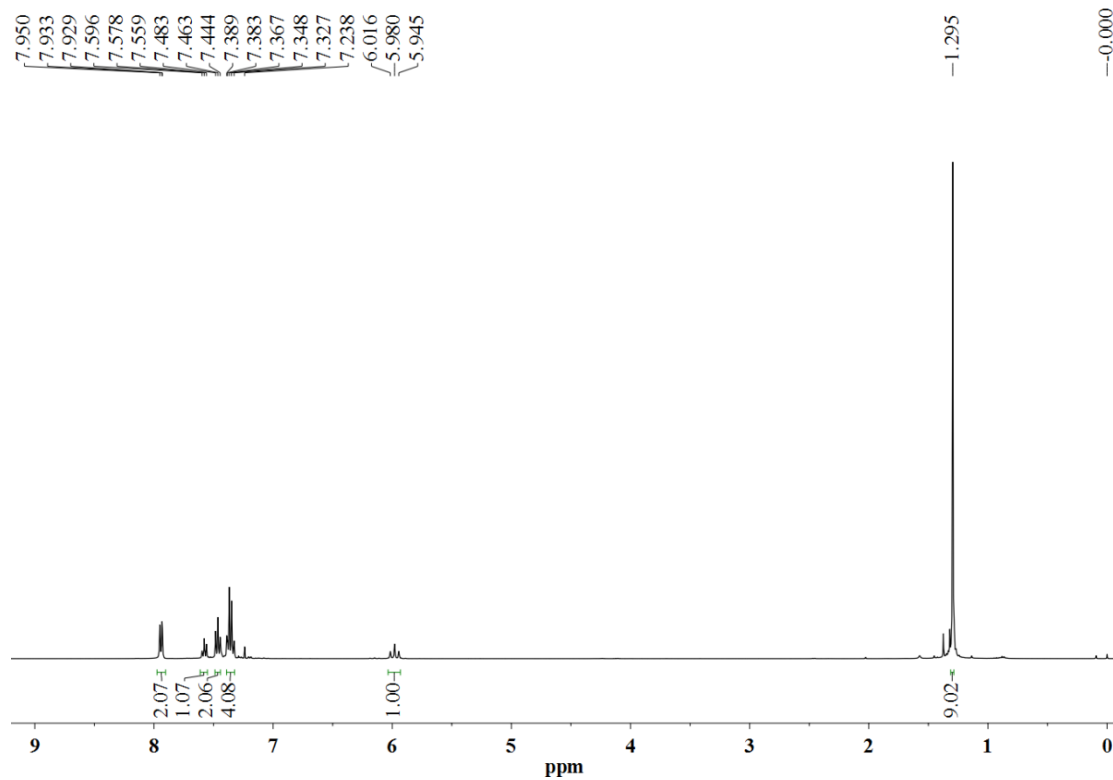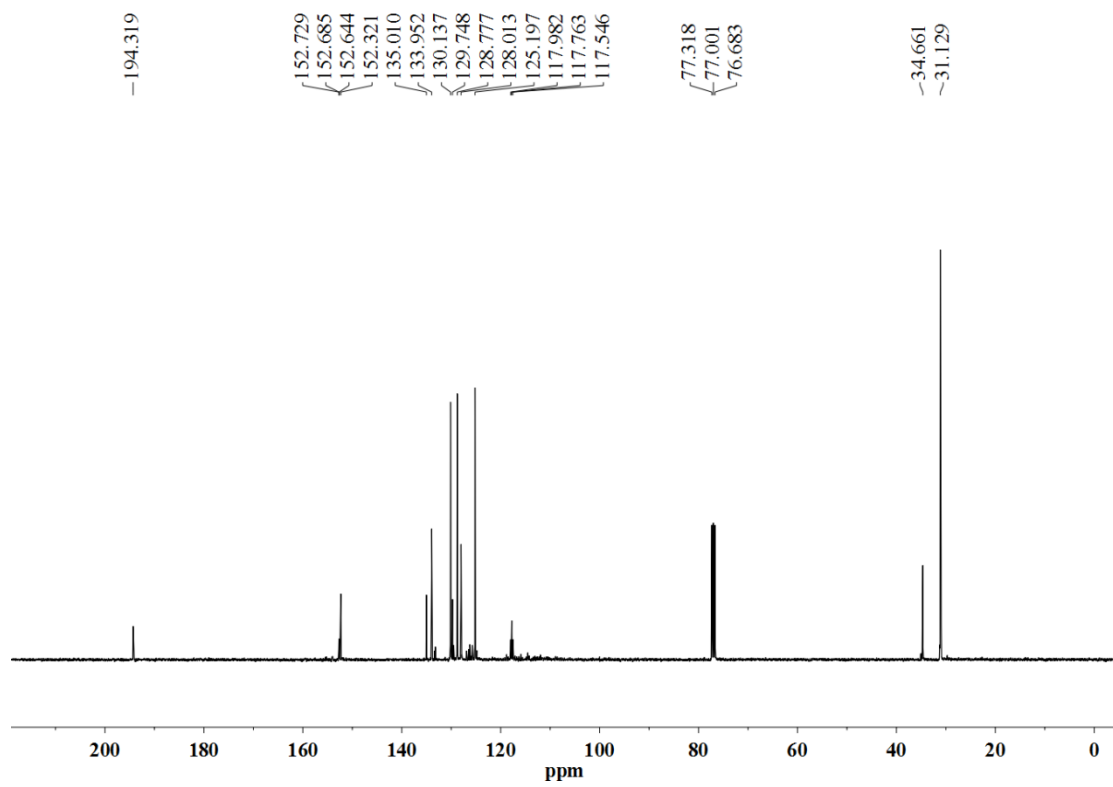

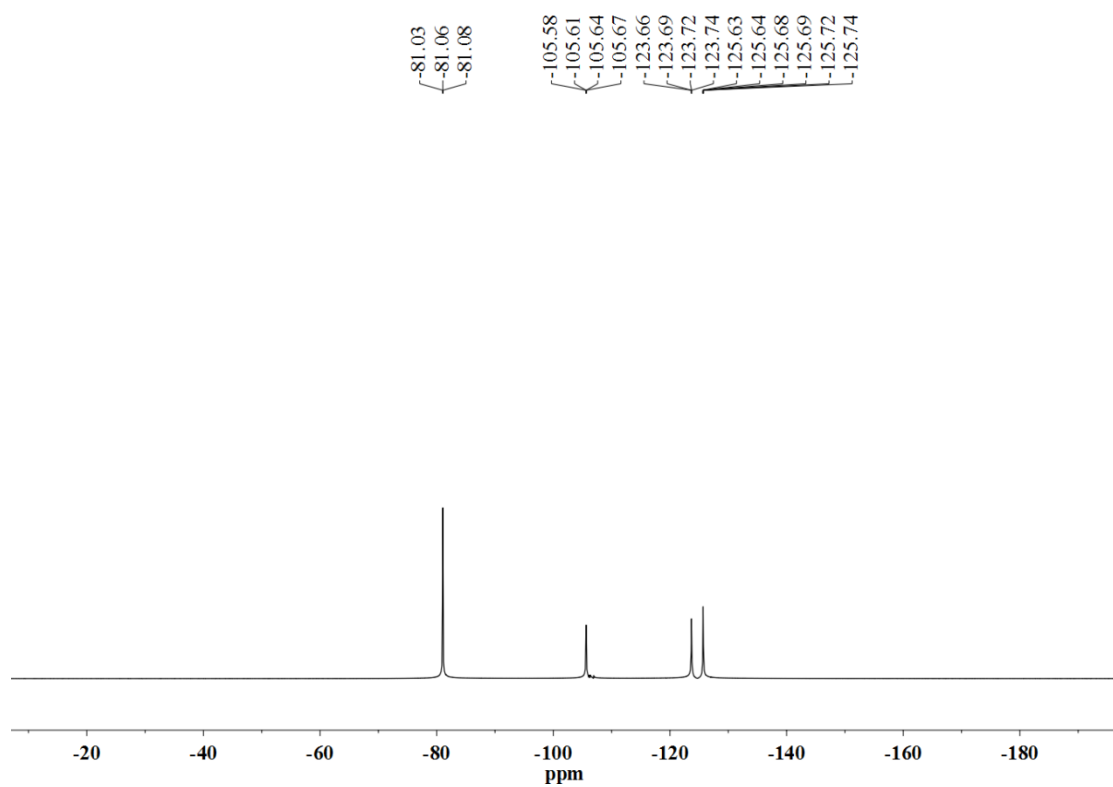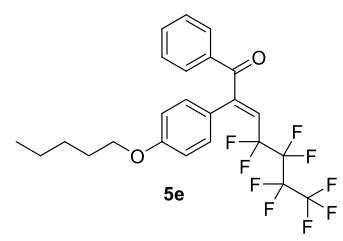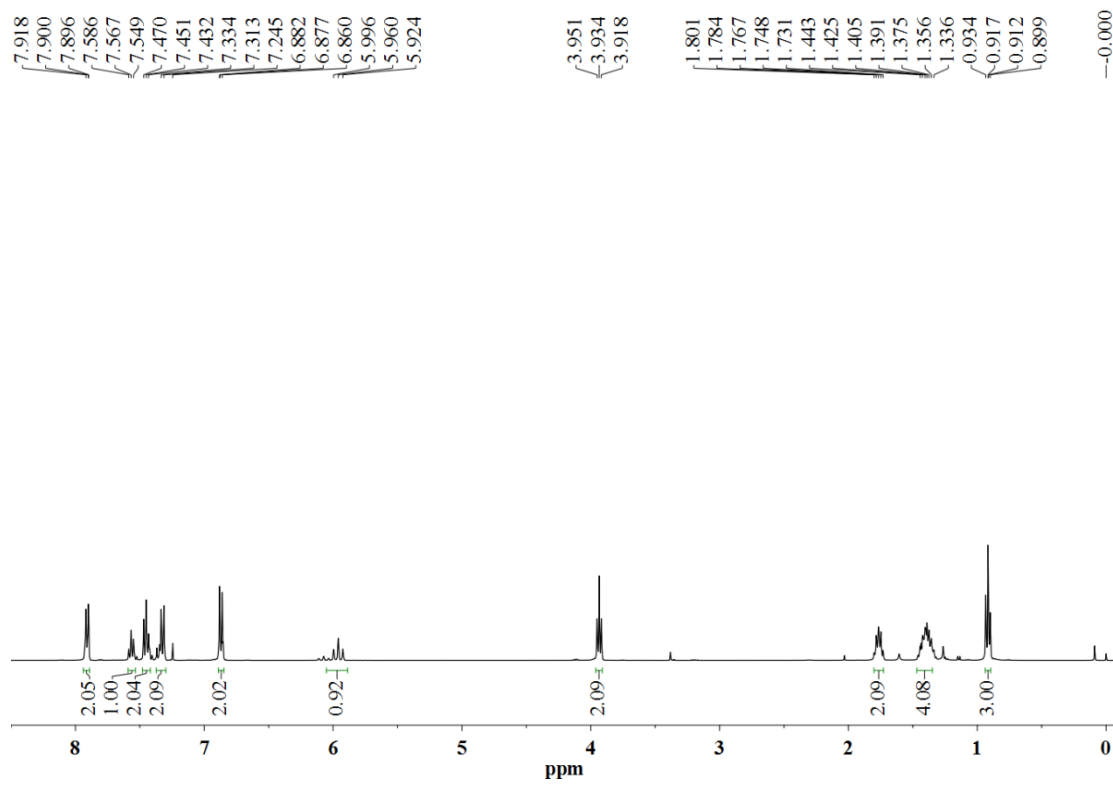

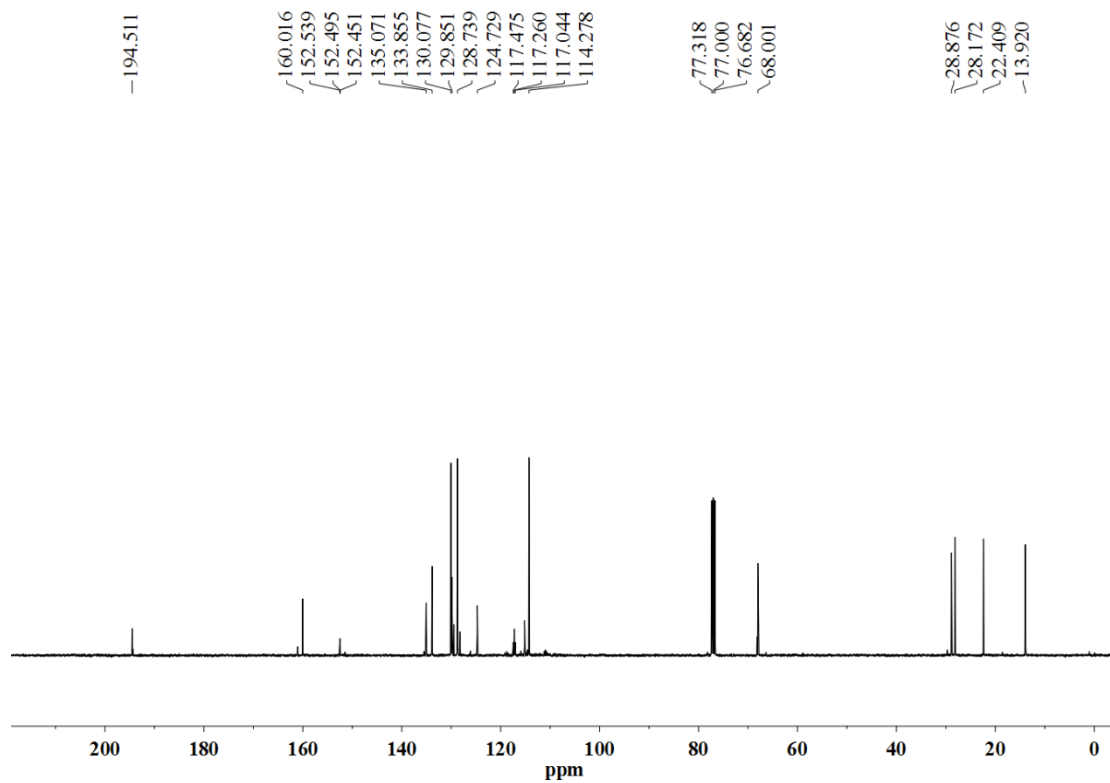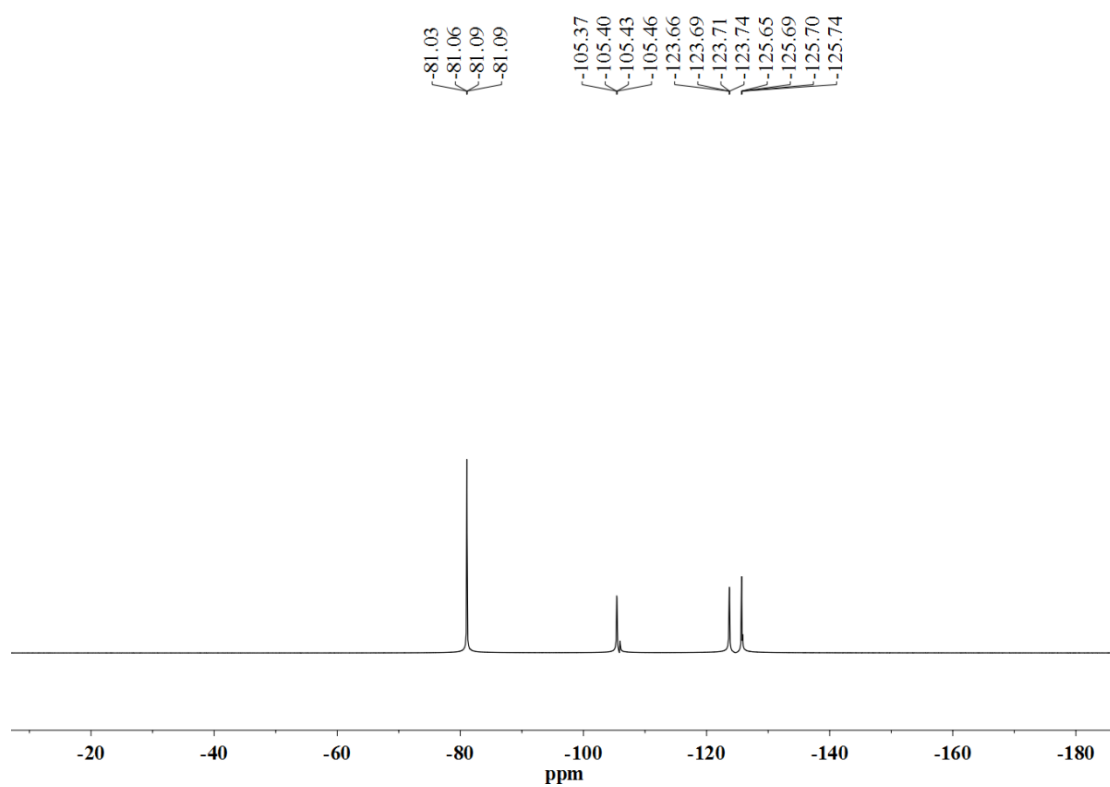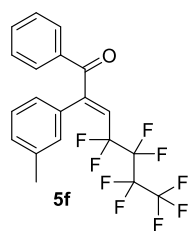

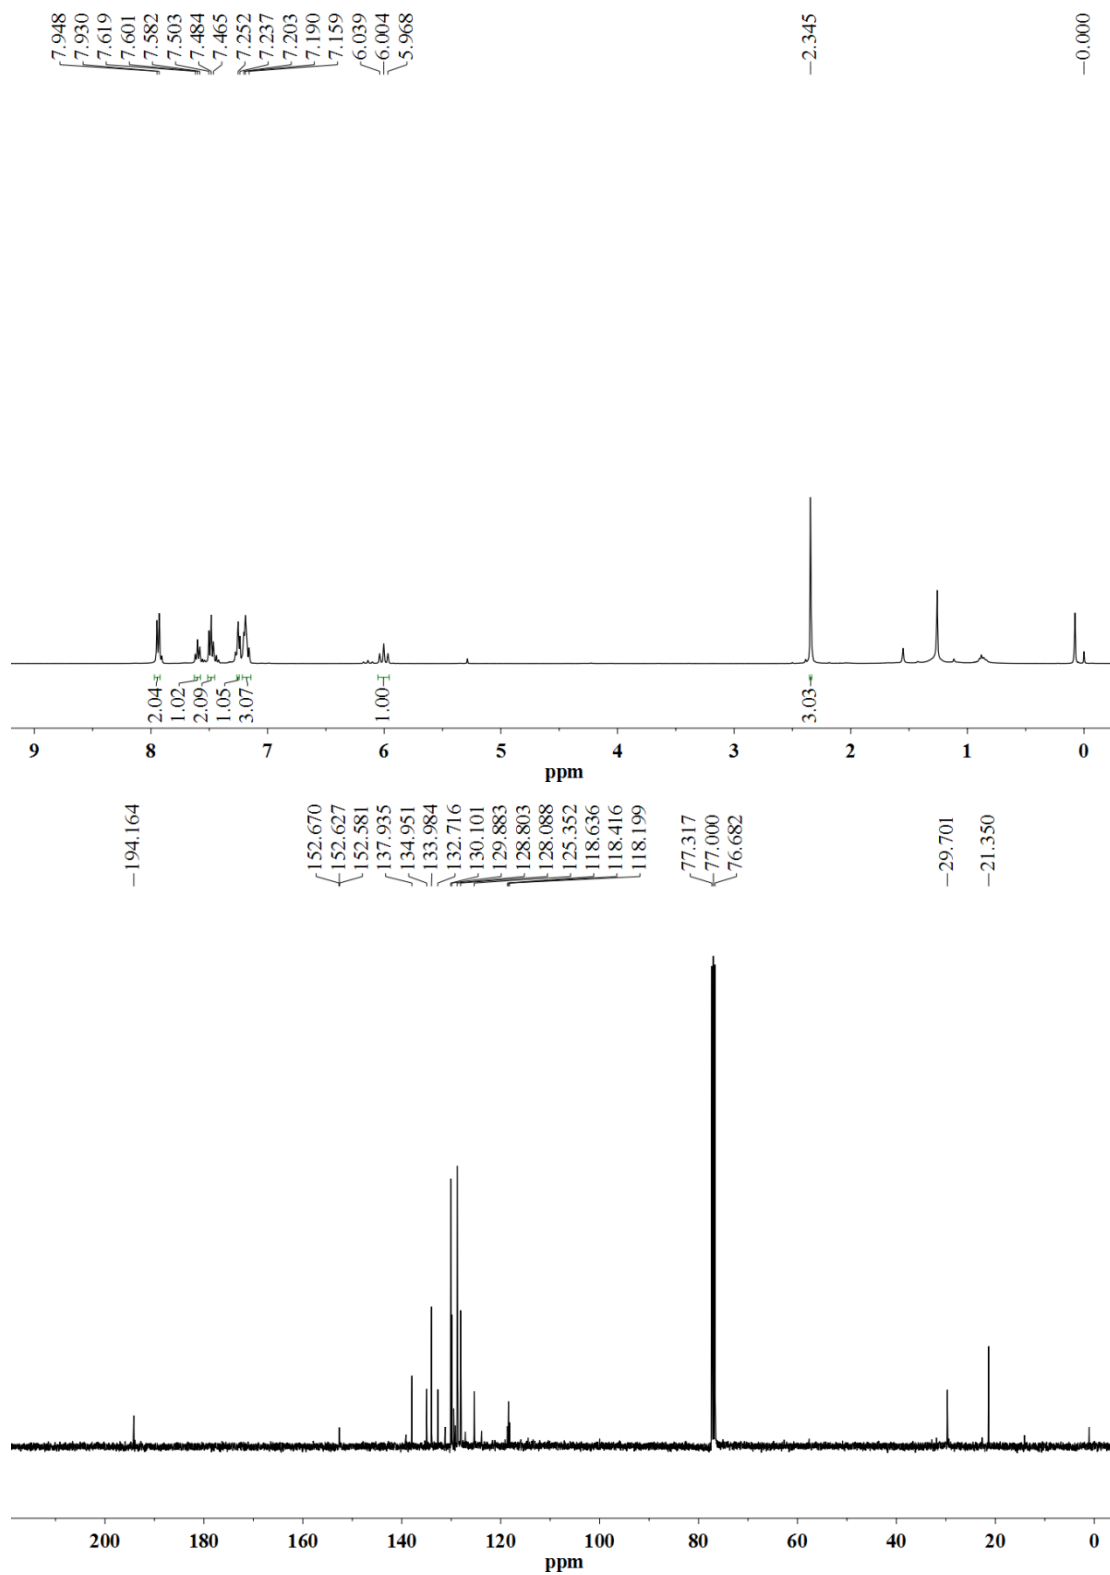

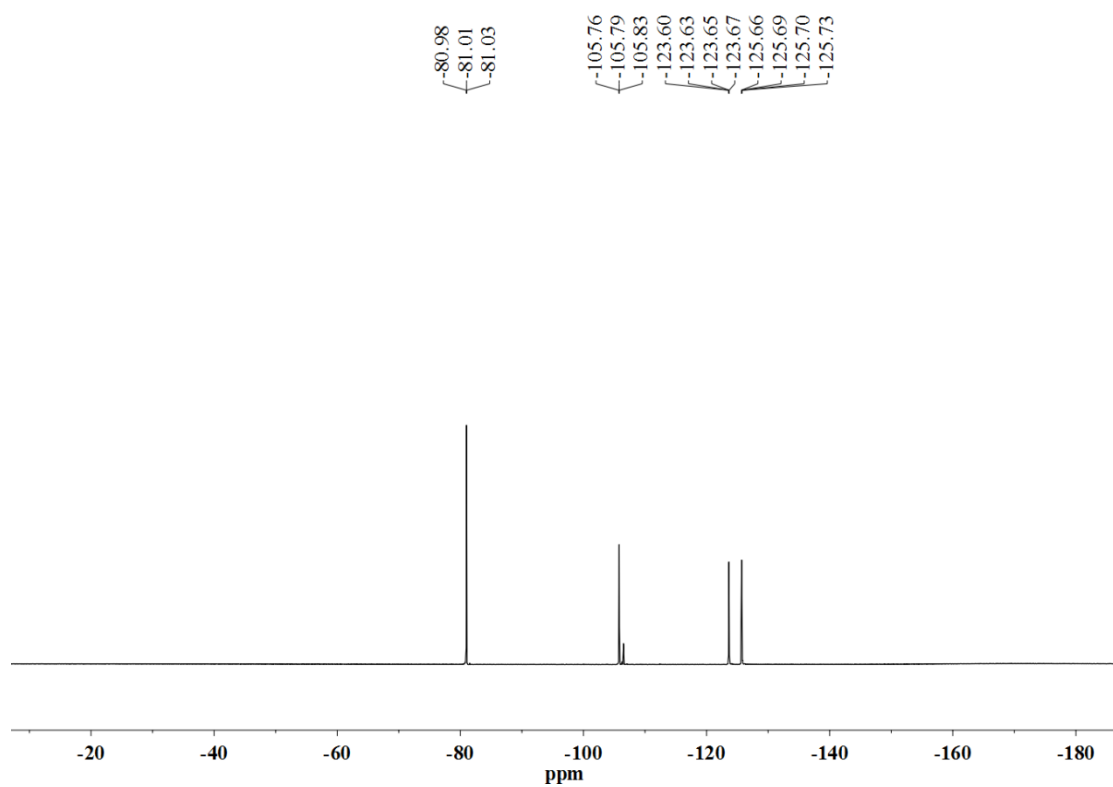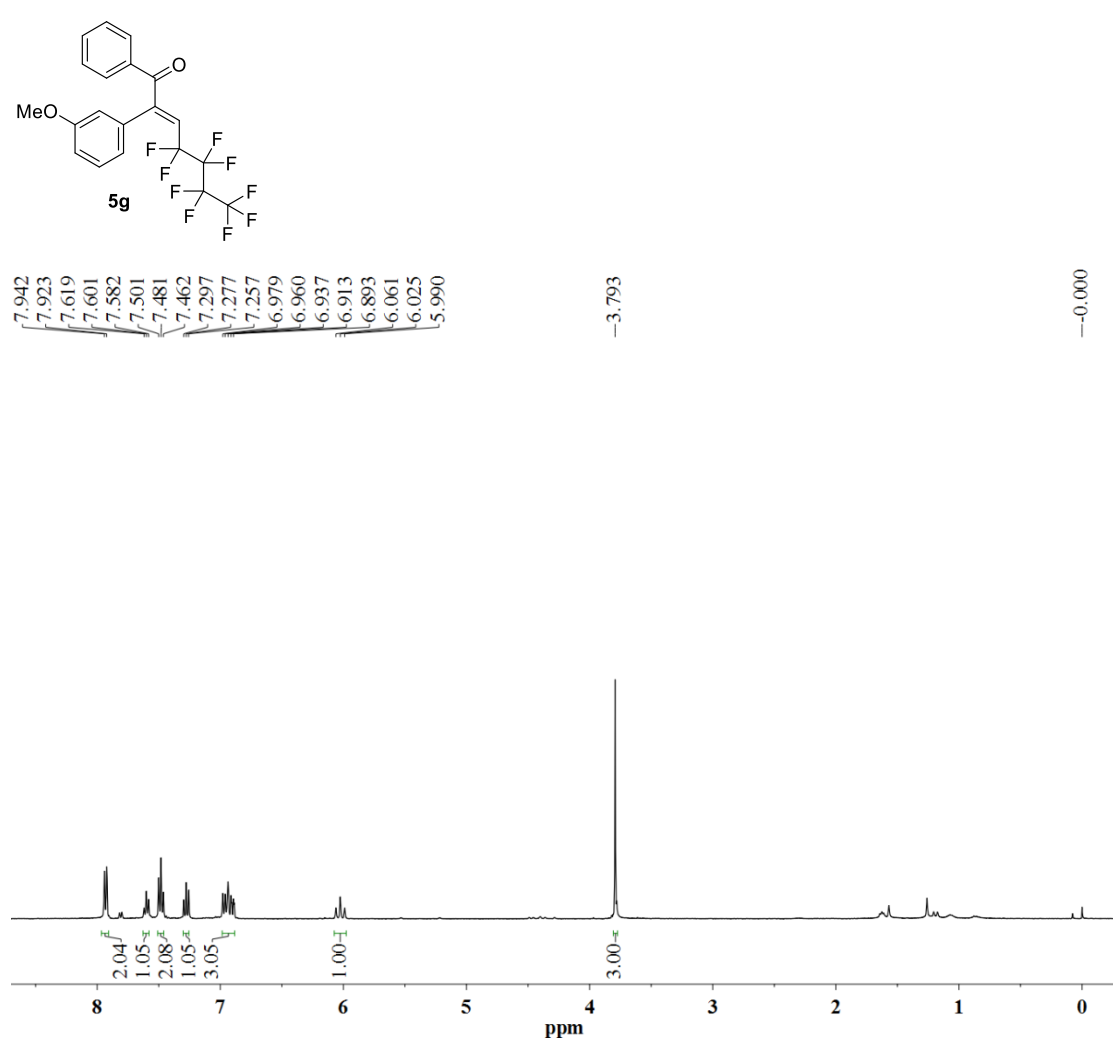

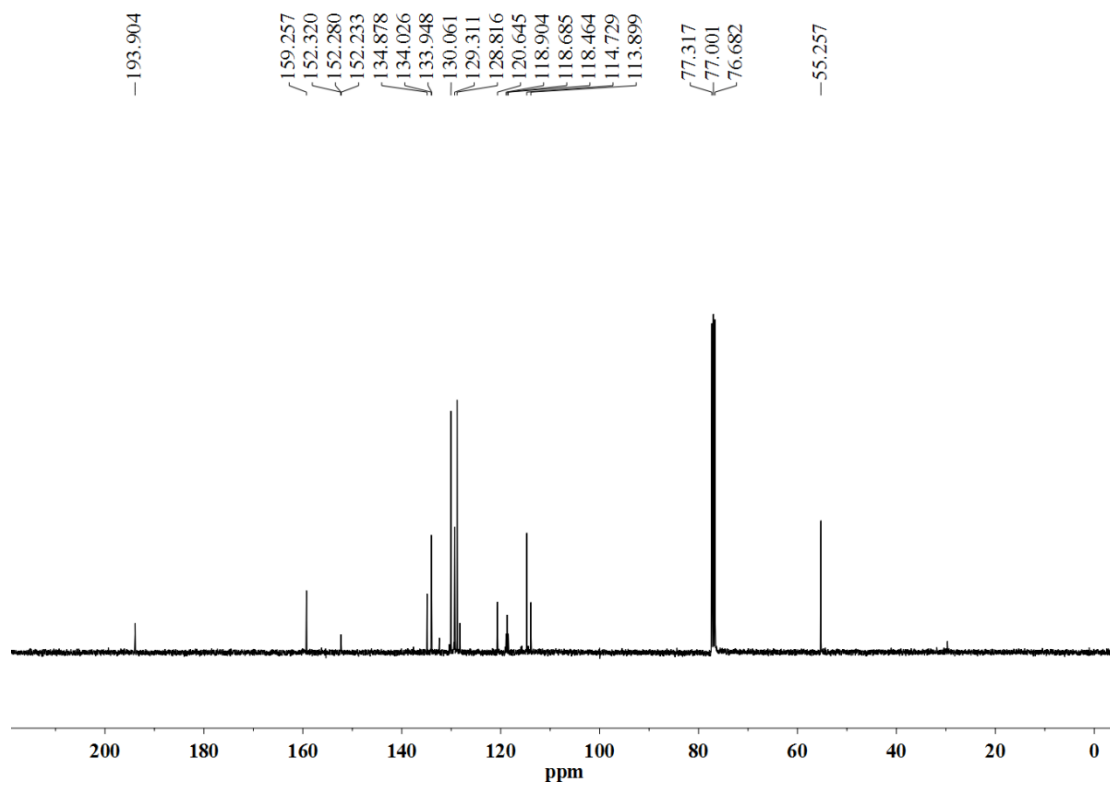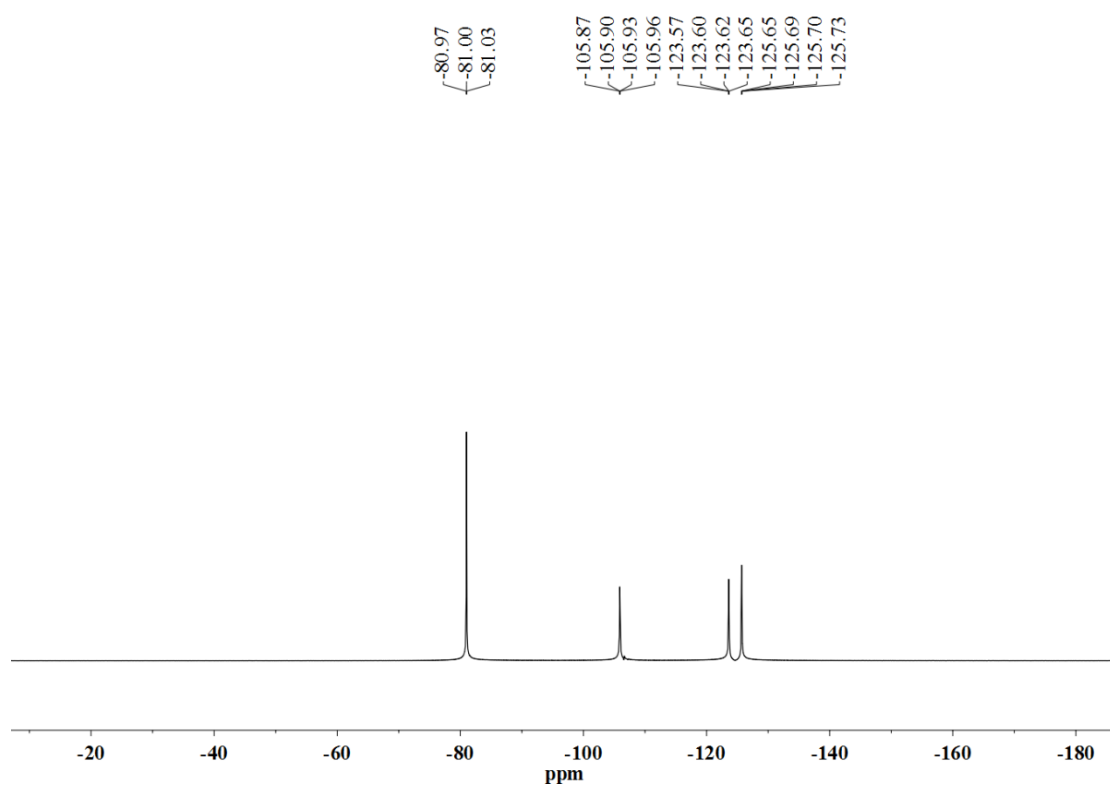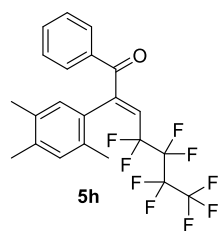

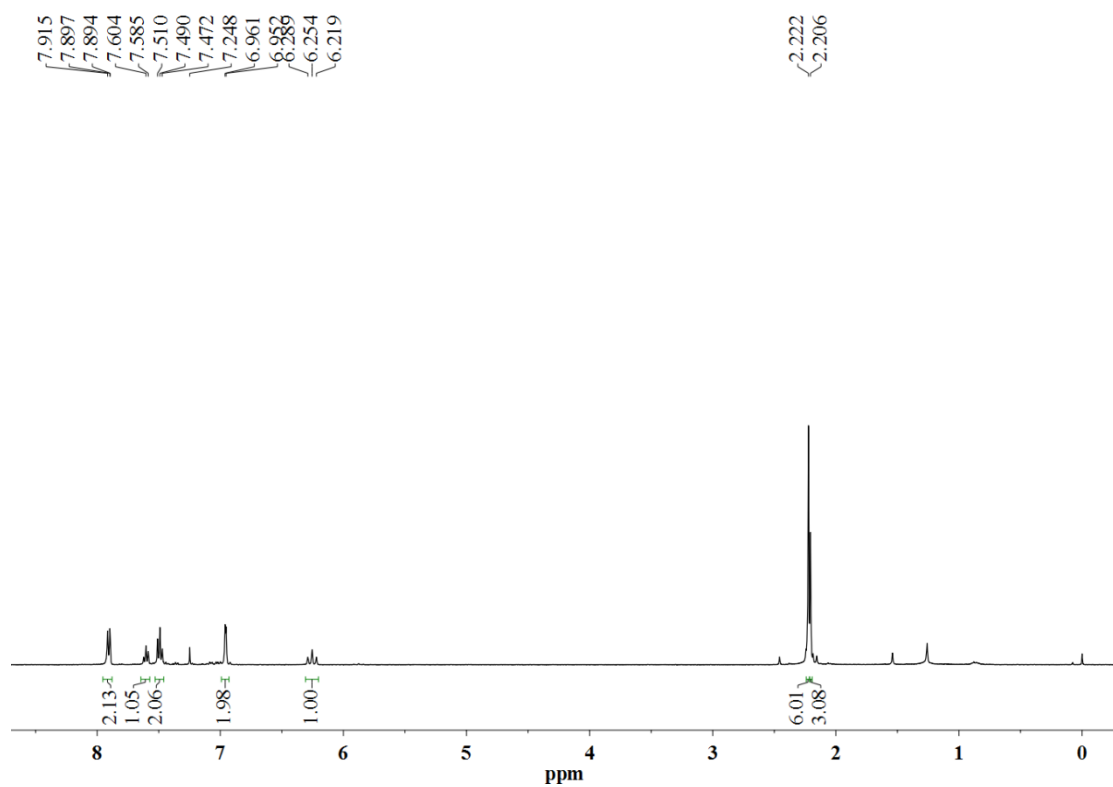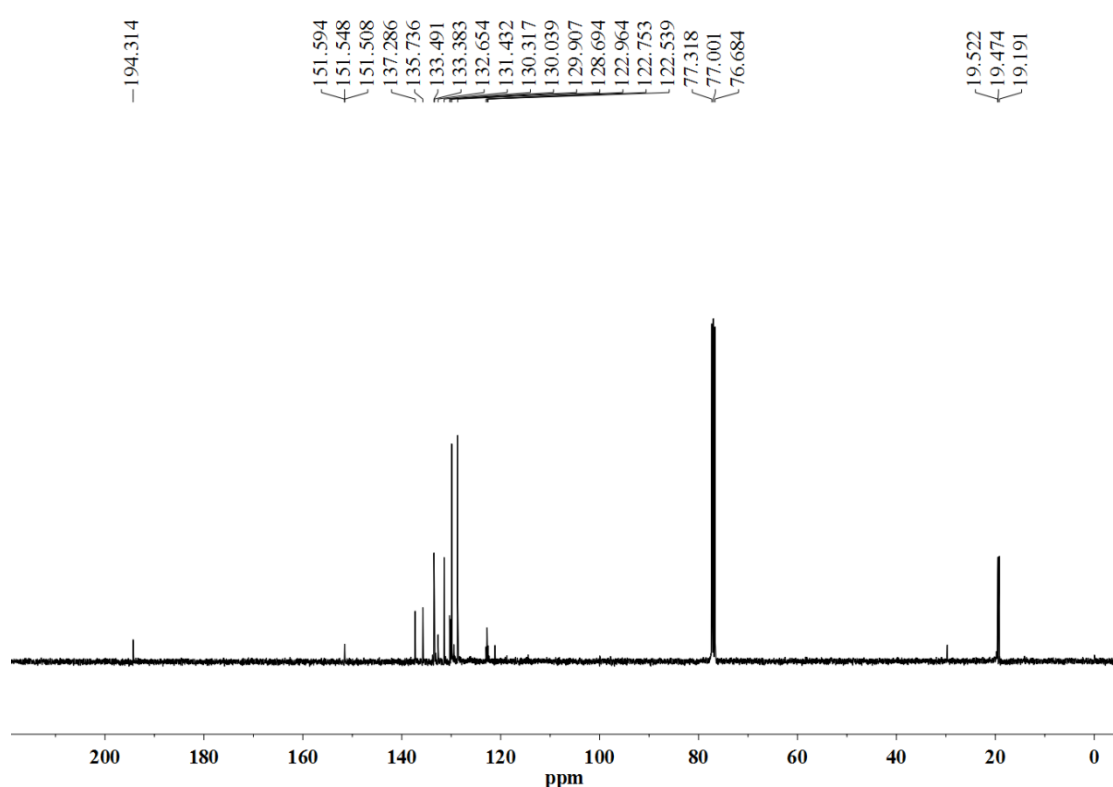

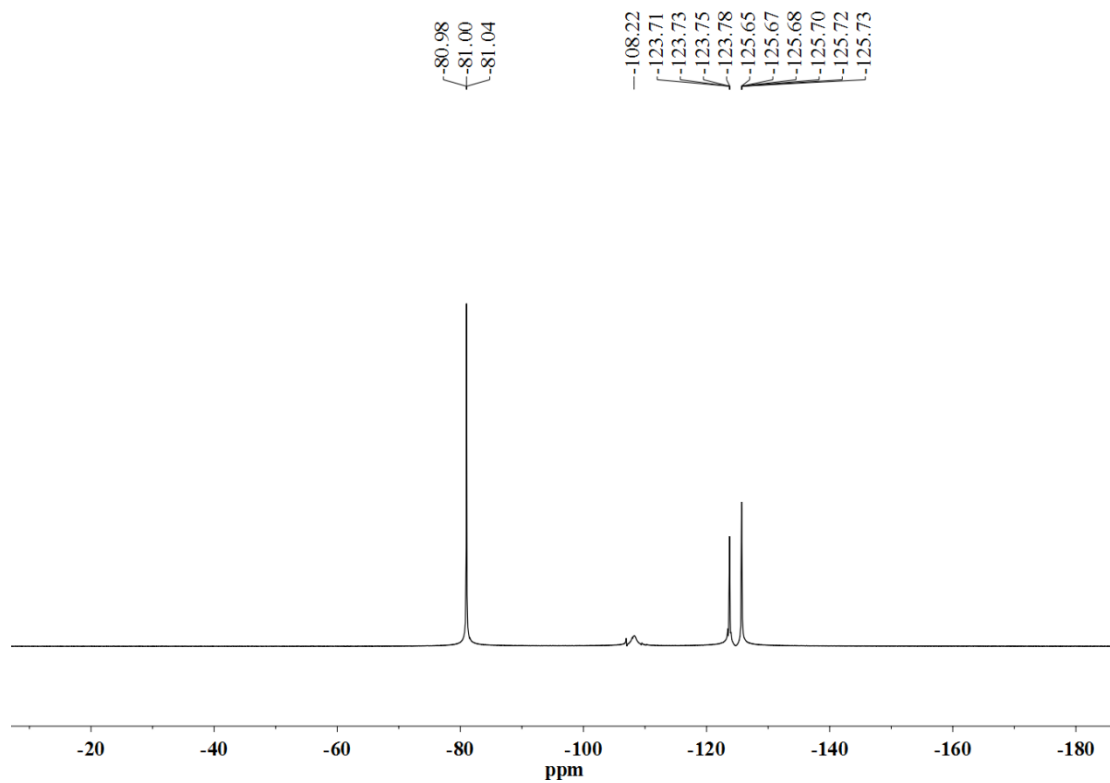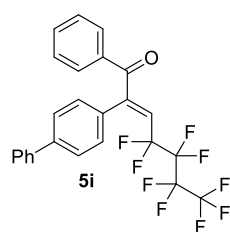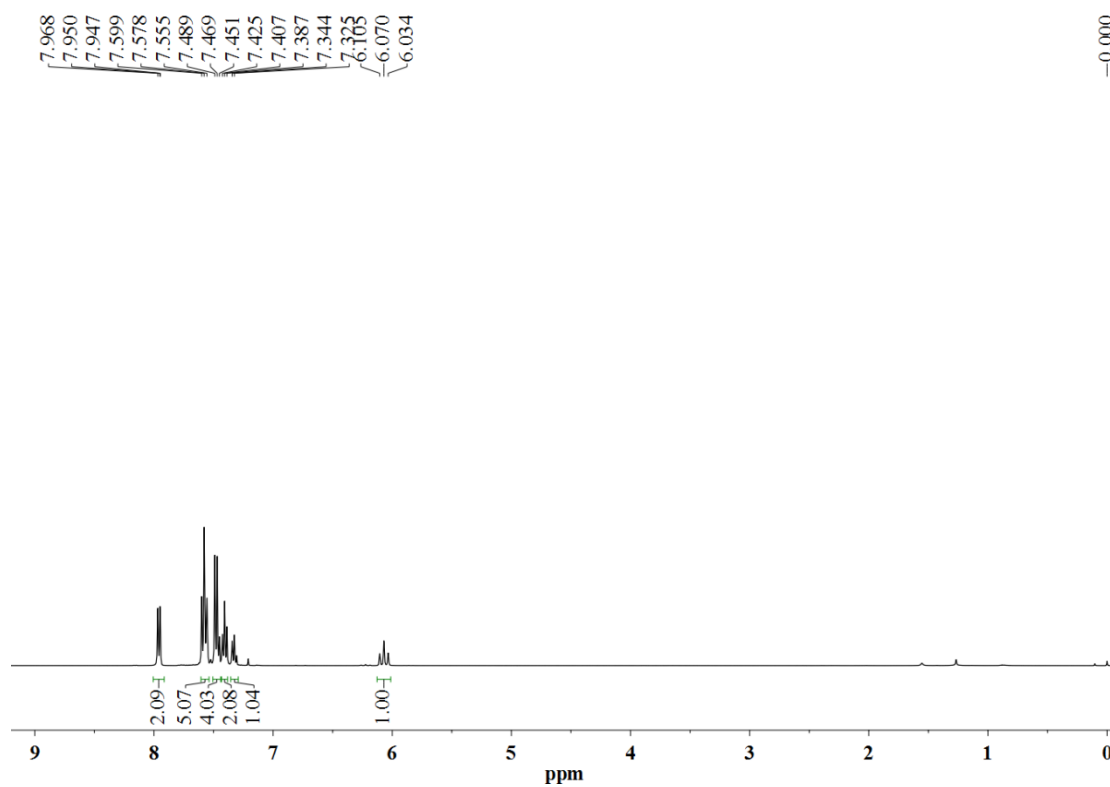



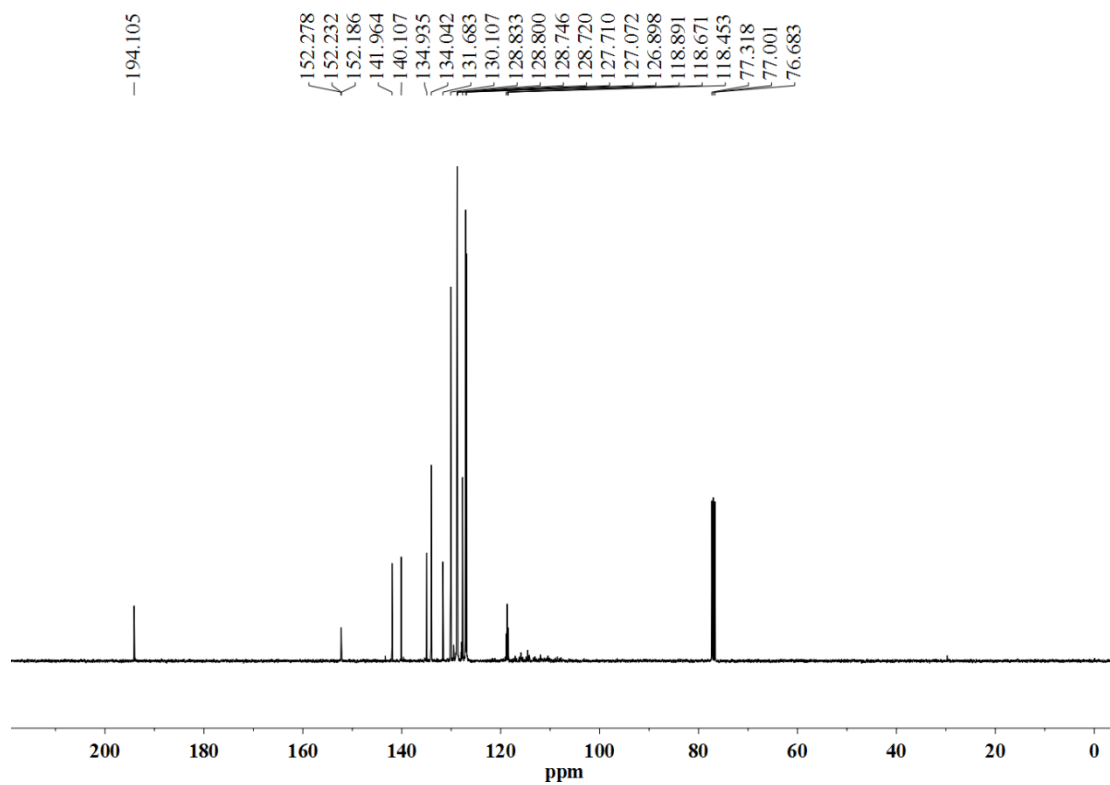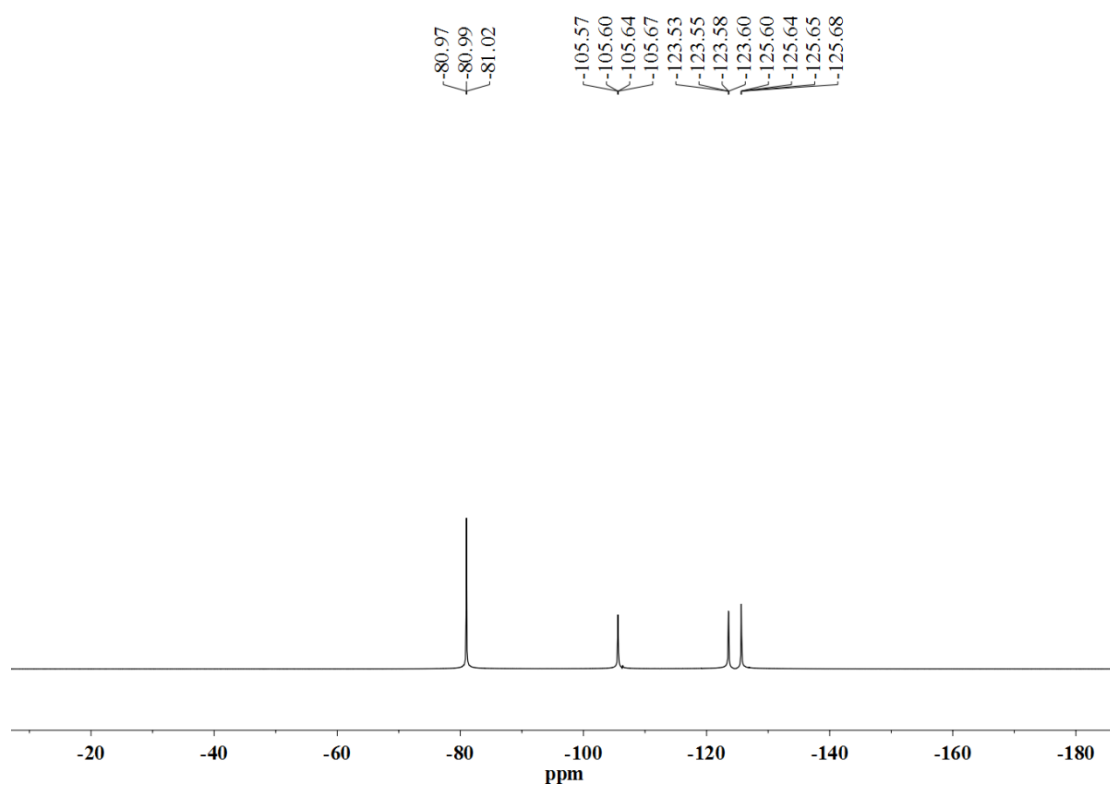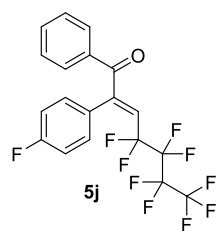

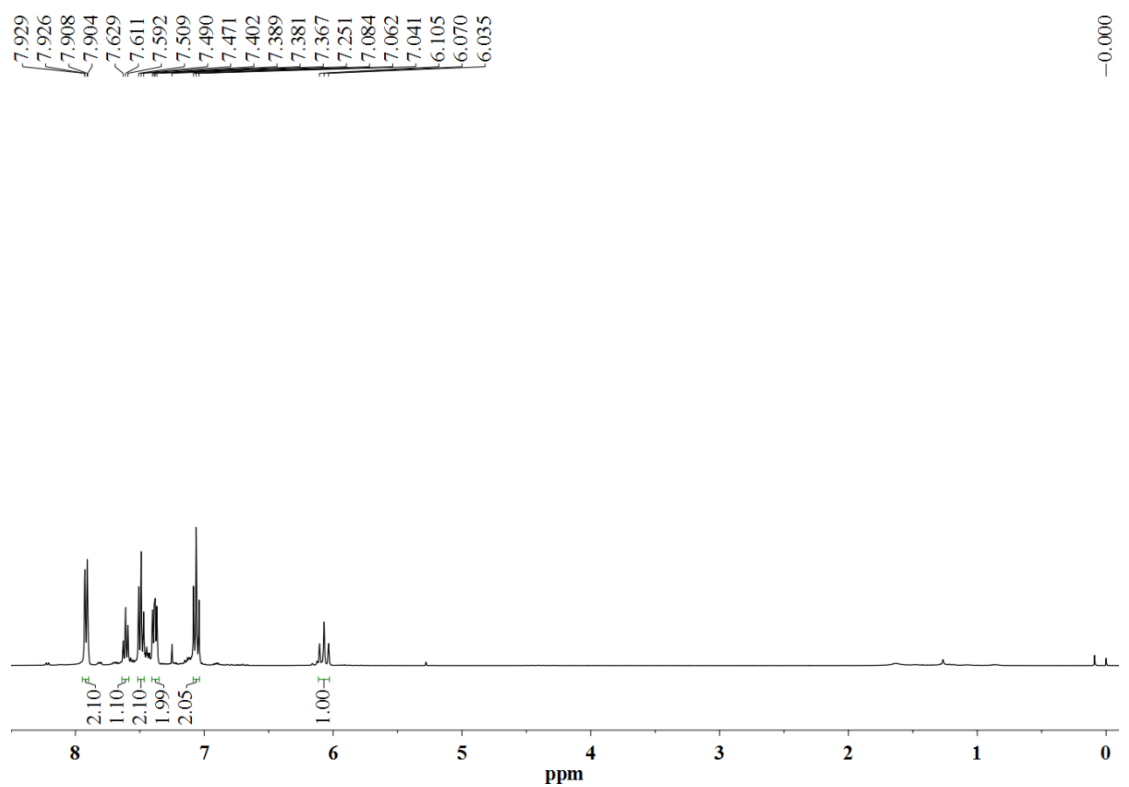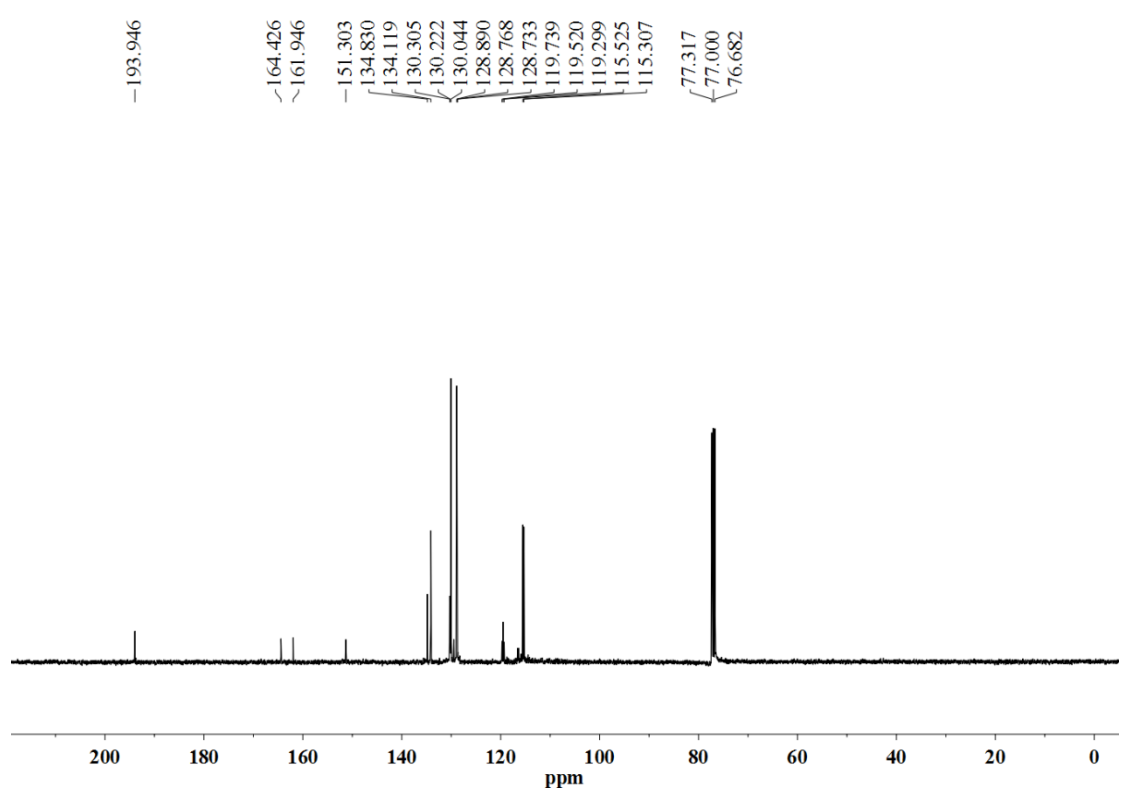

-0.000

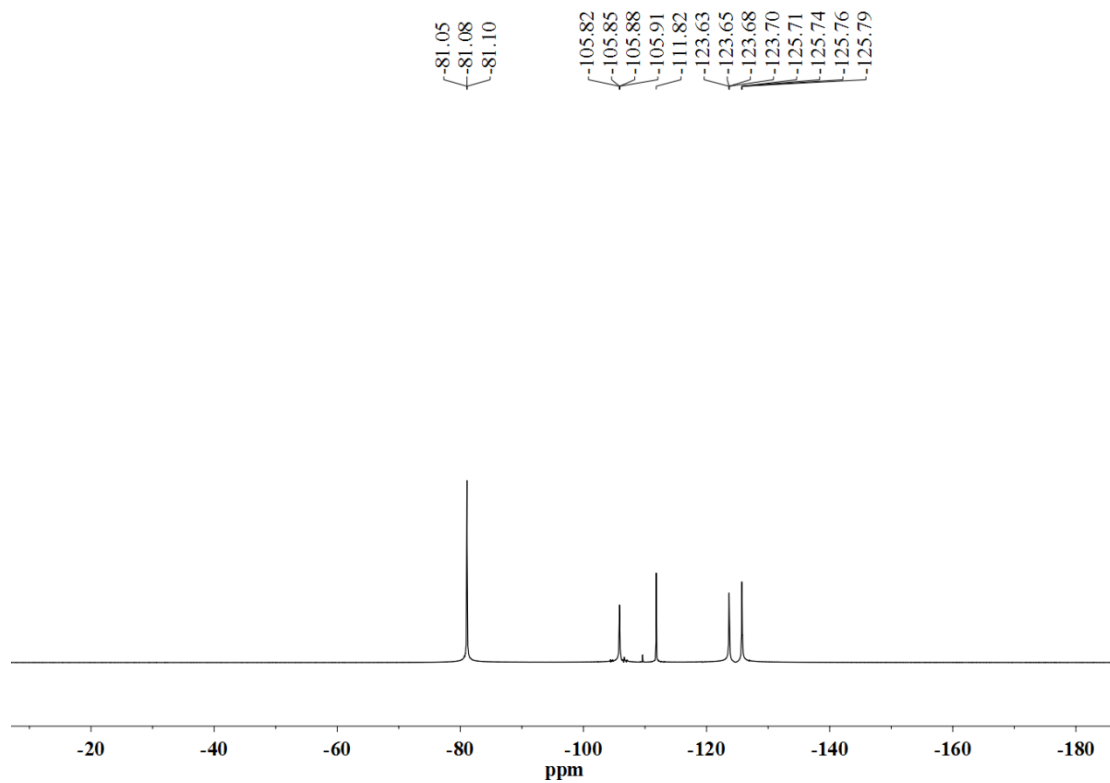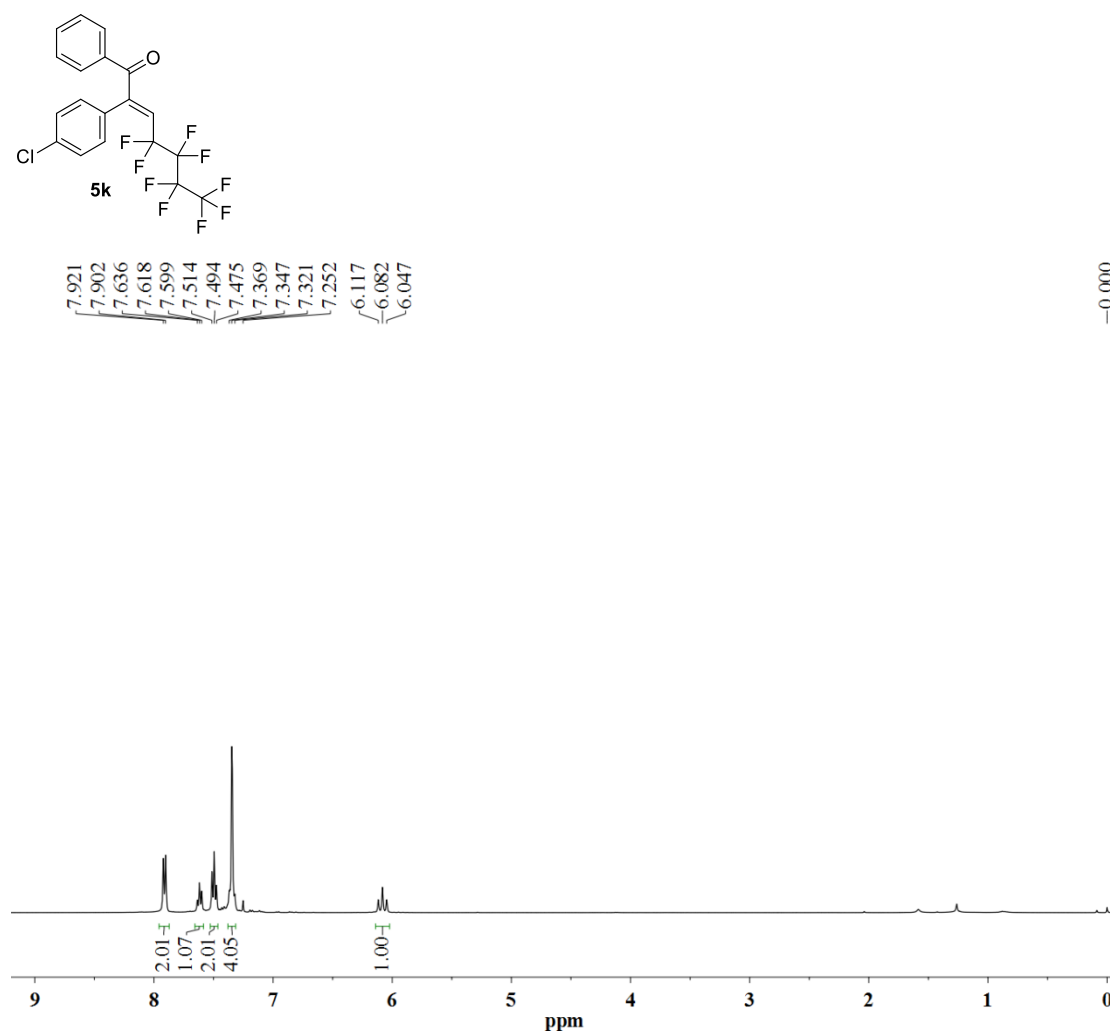

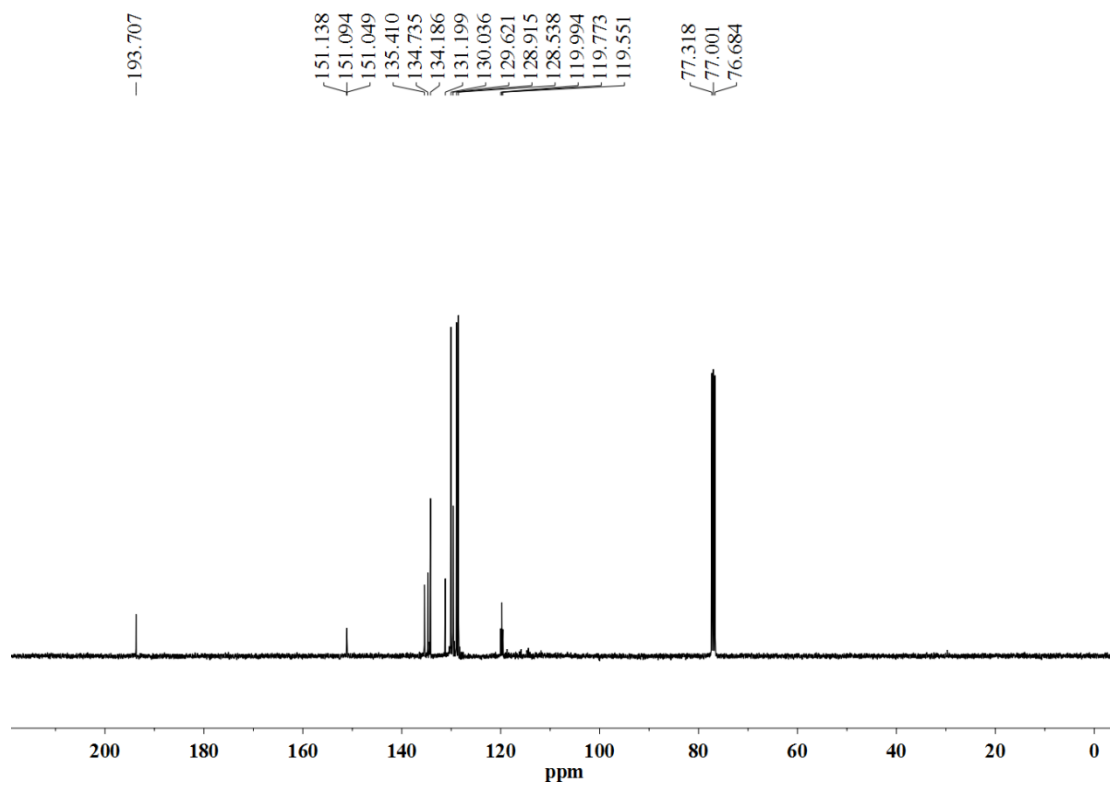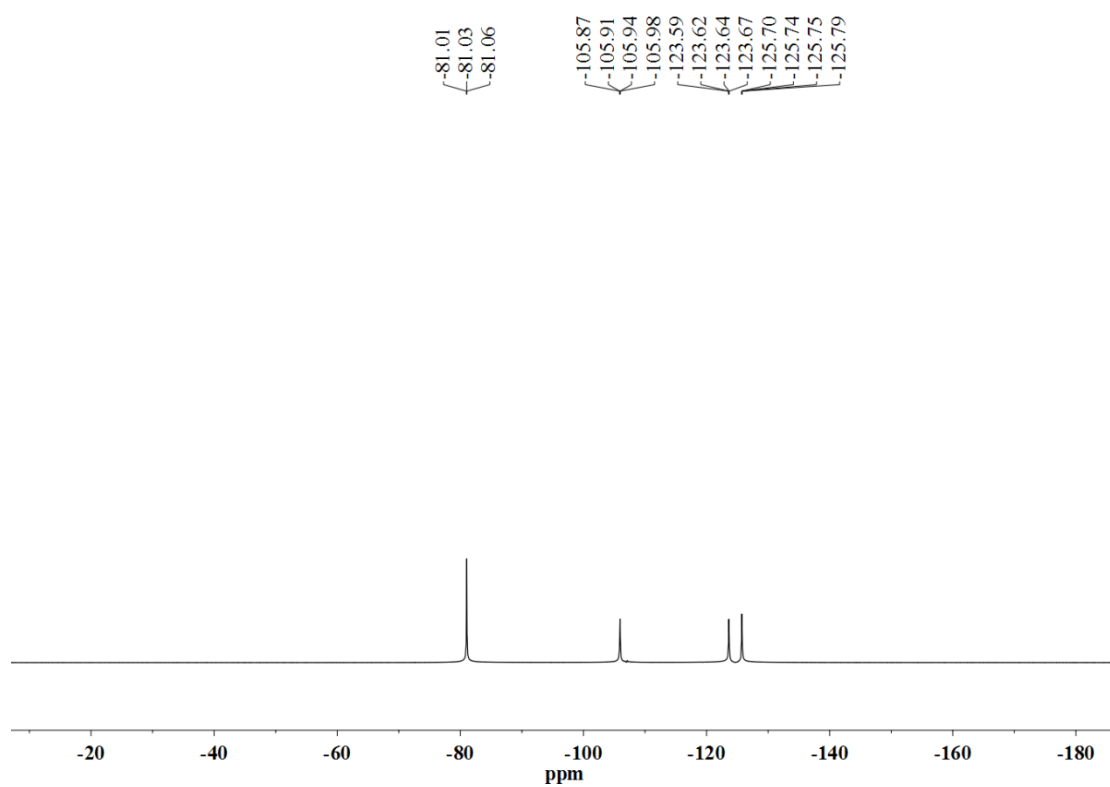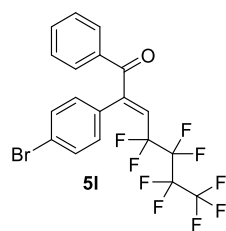

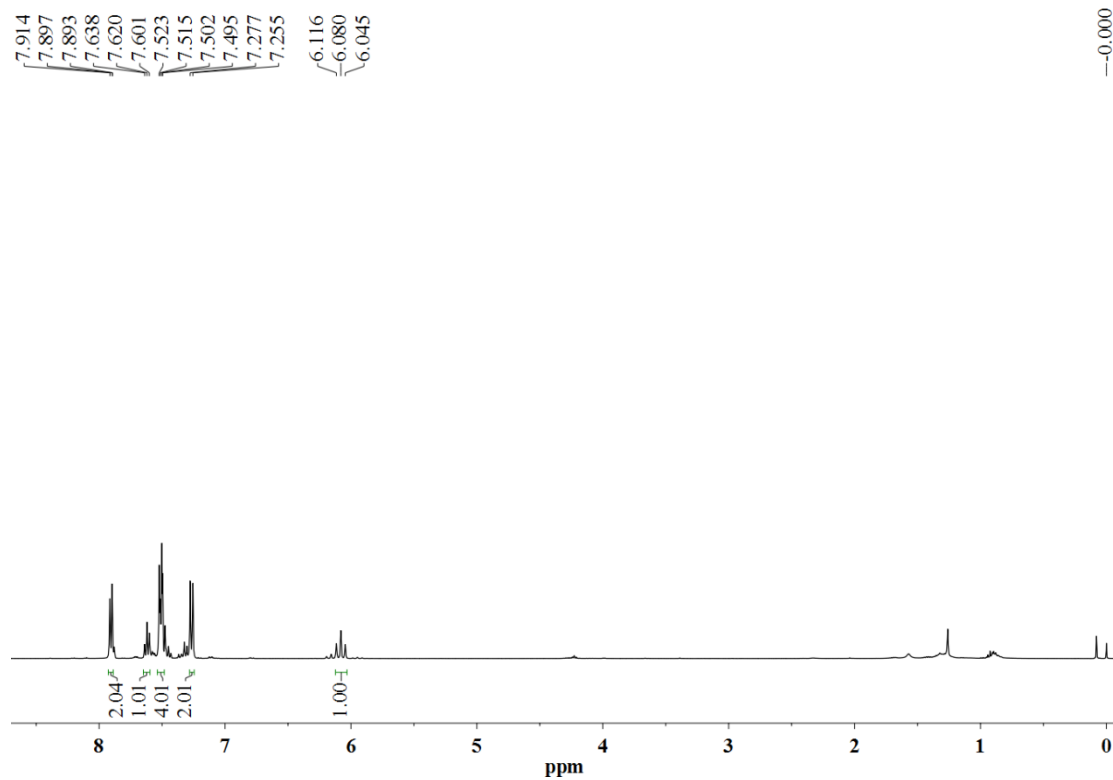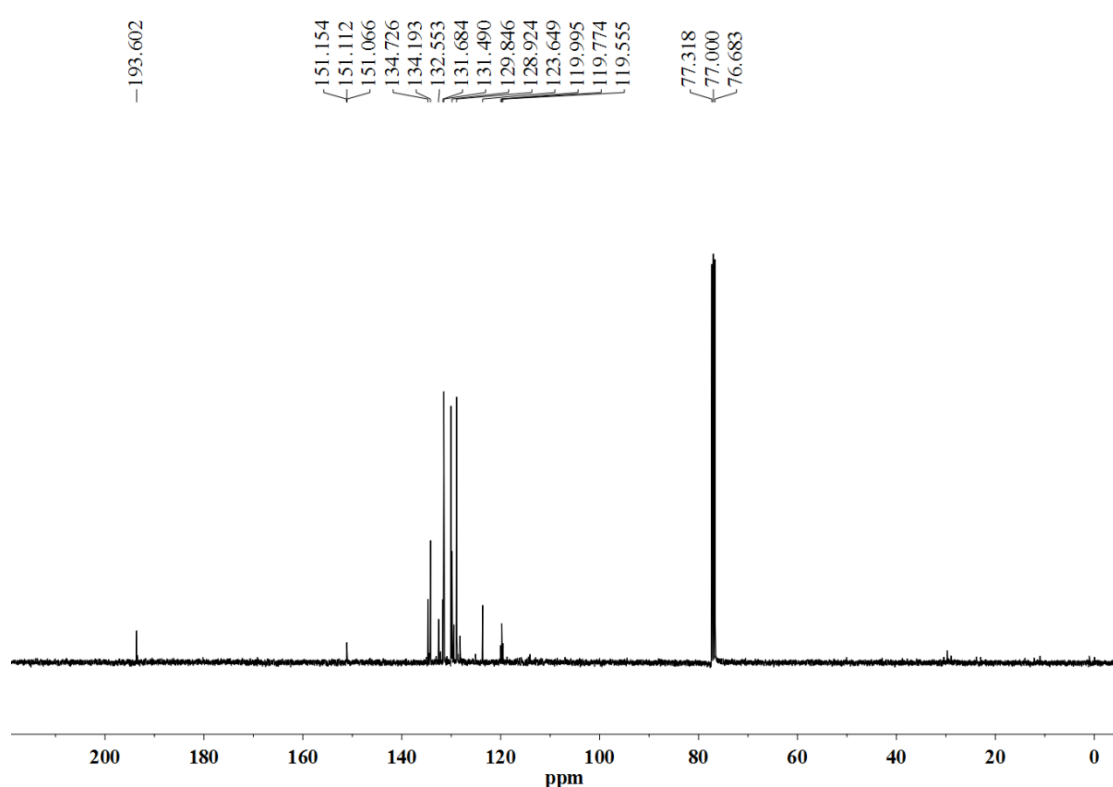

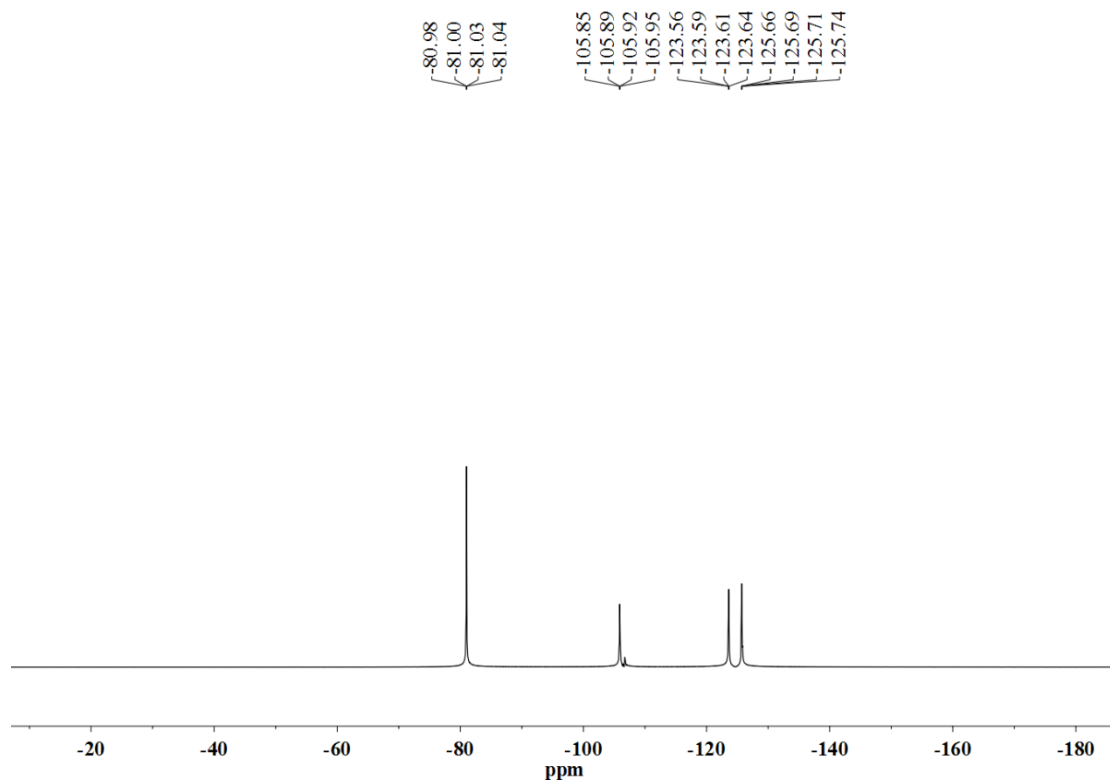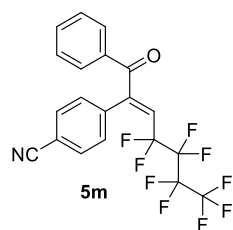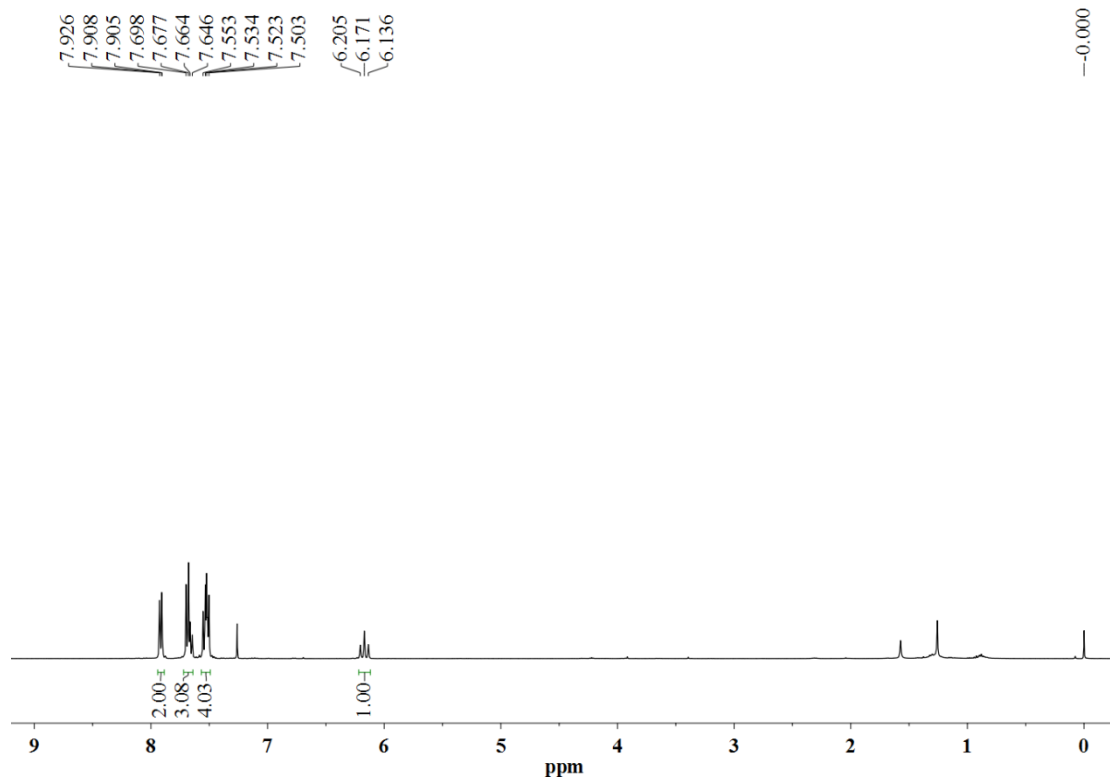

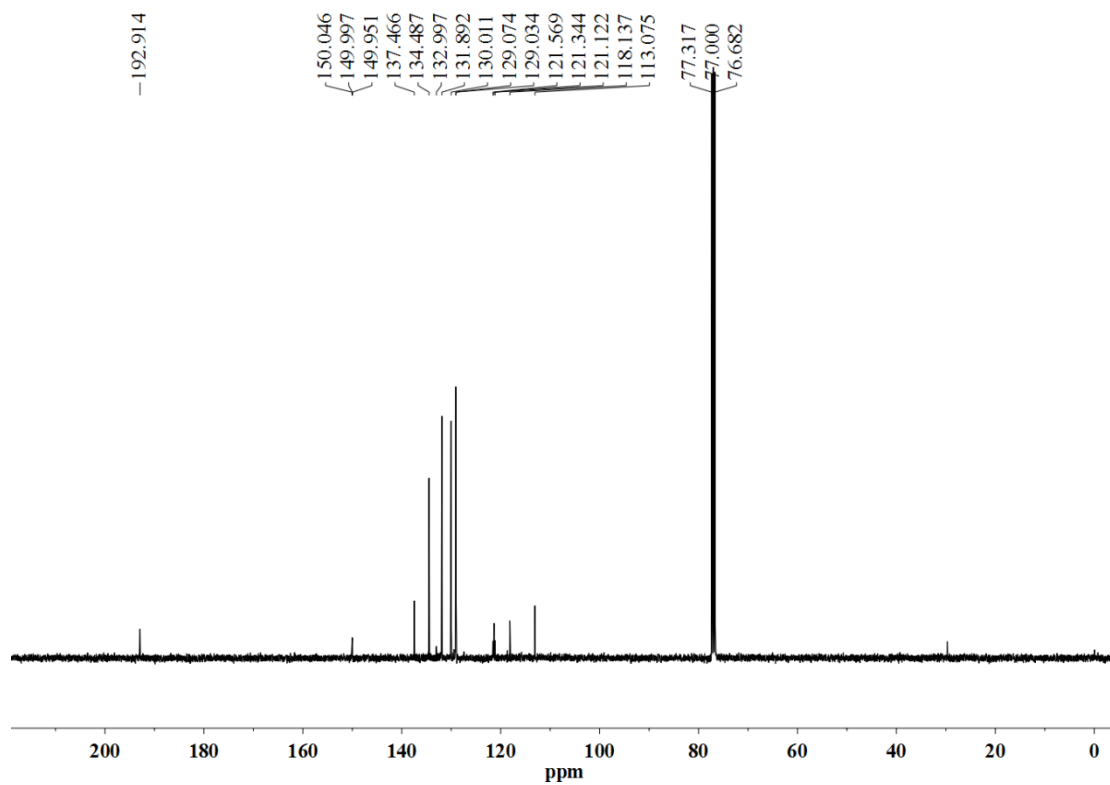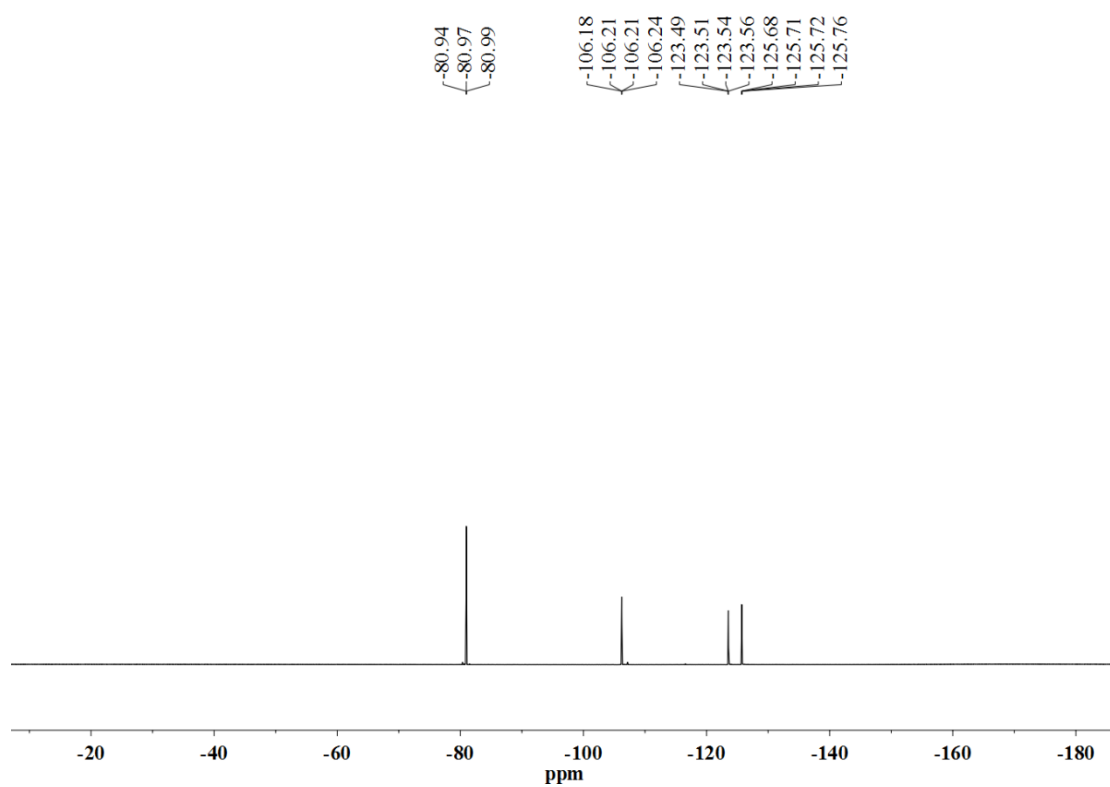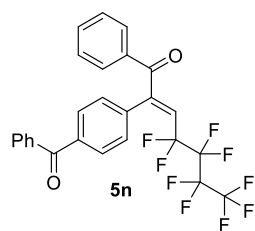

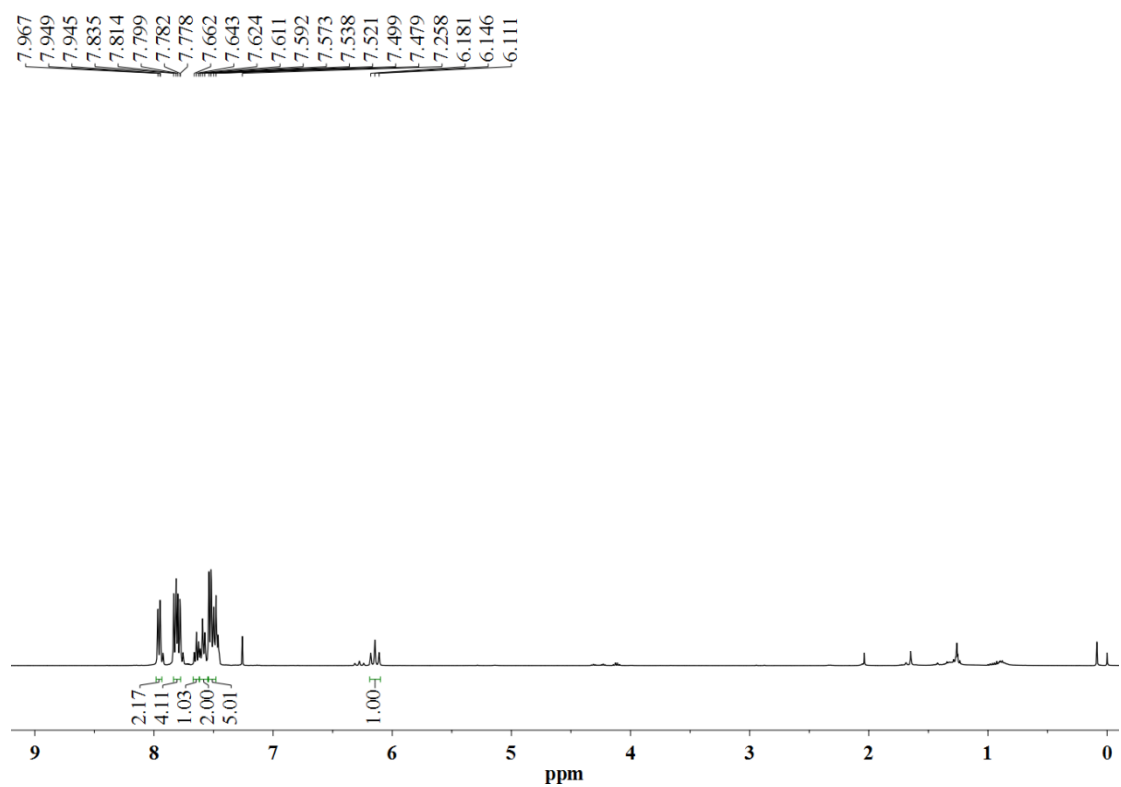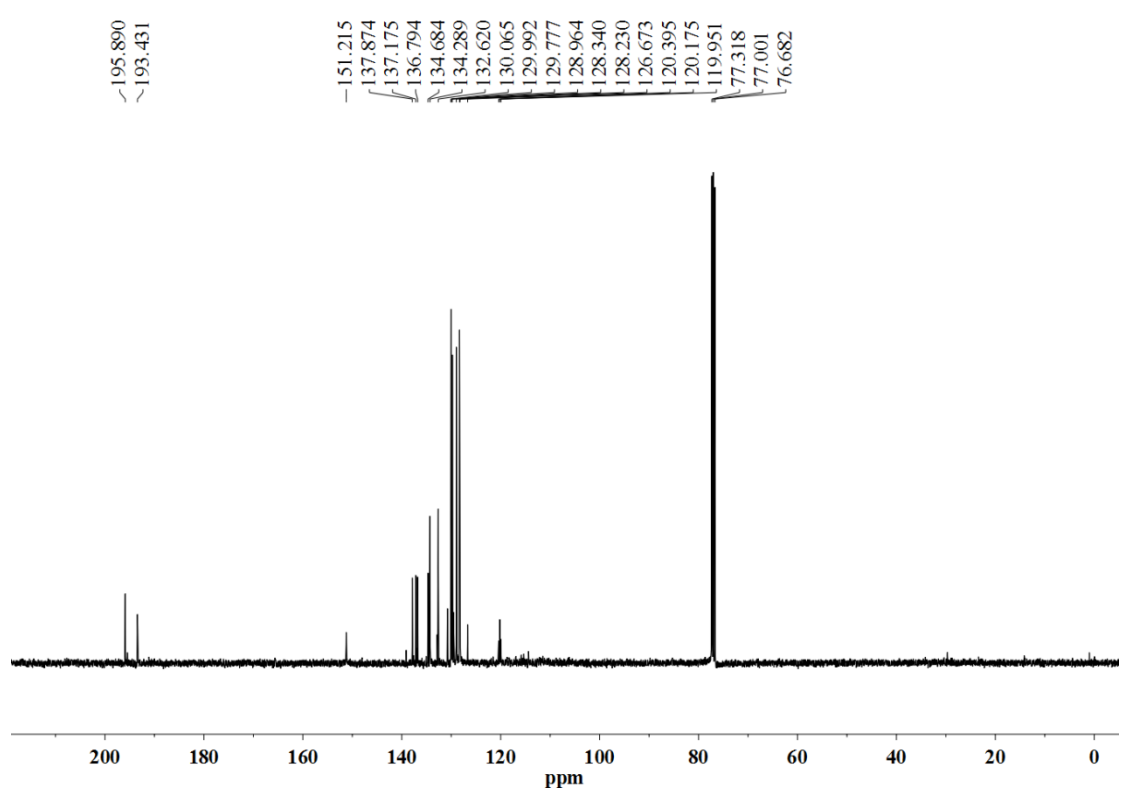



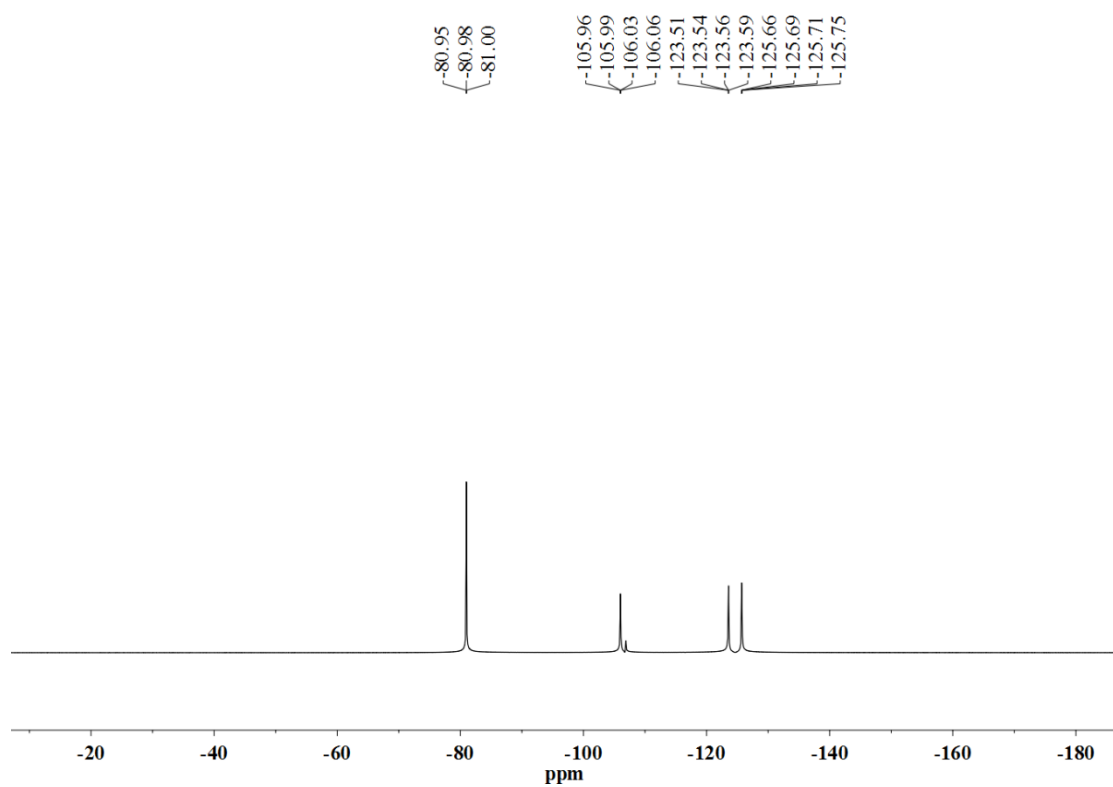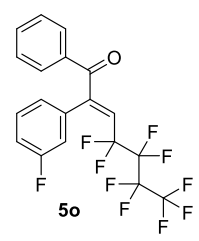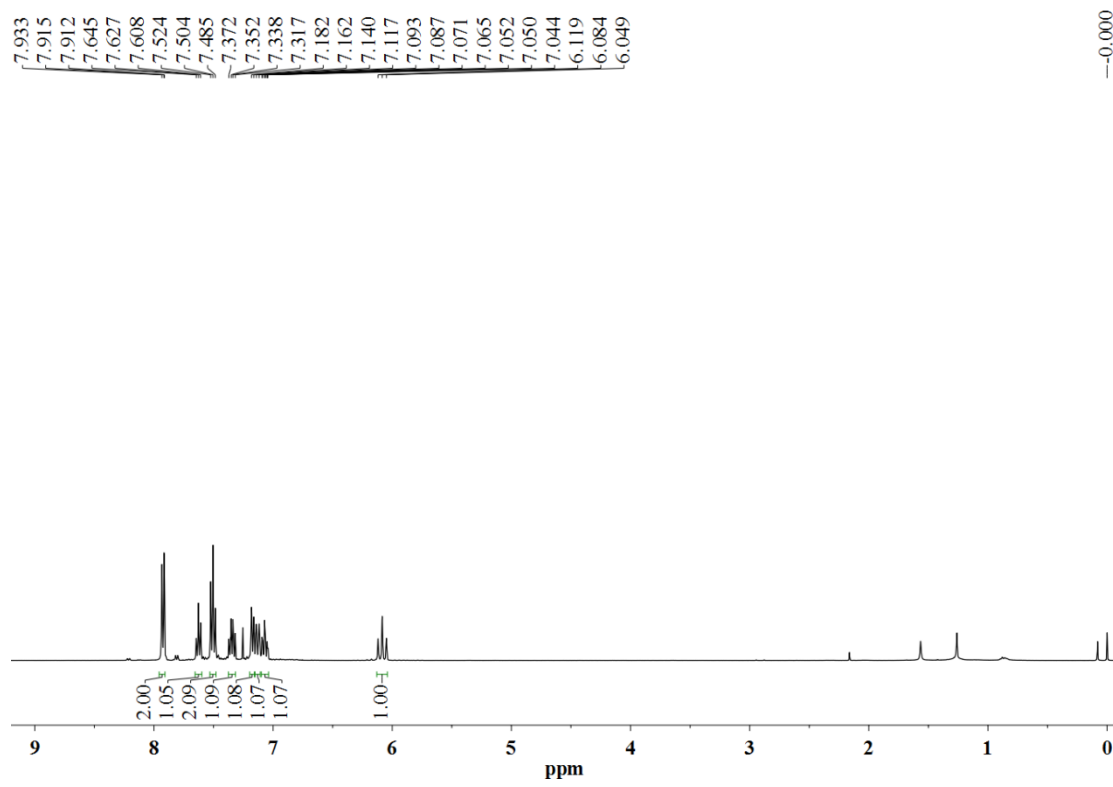

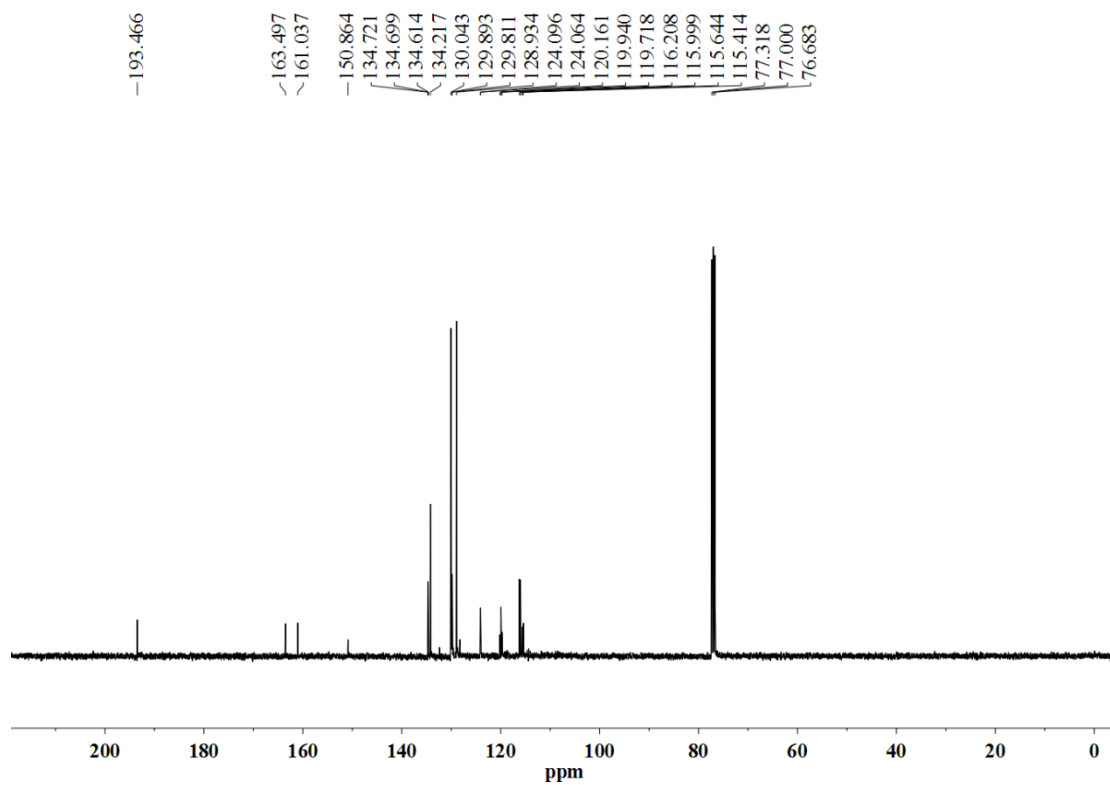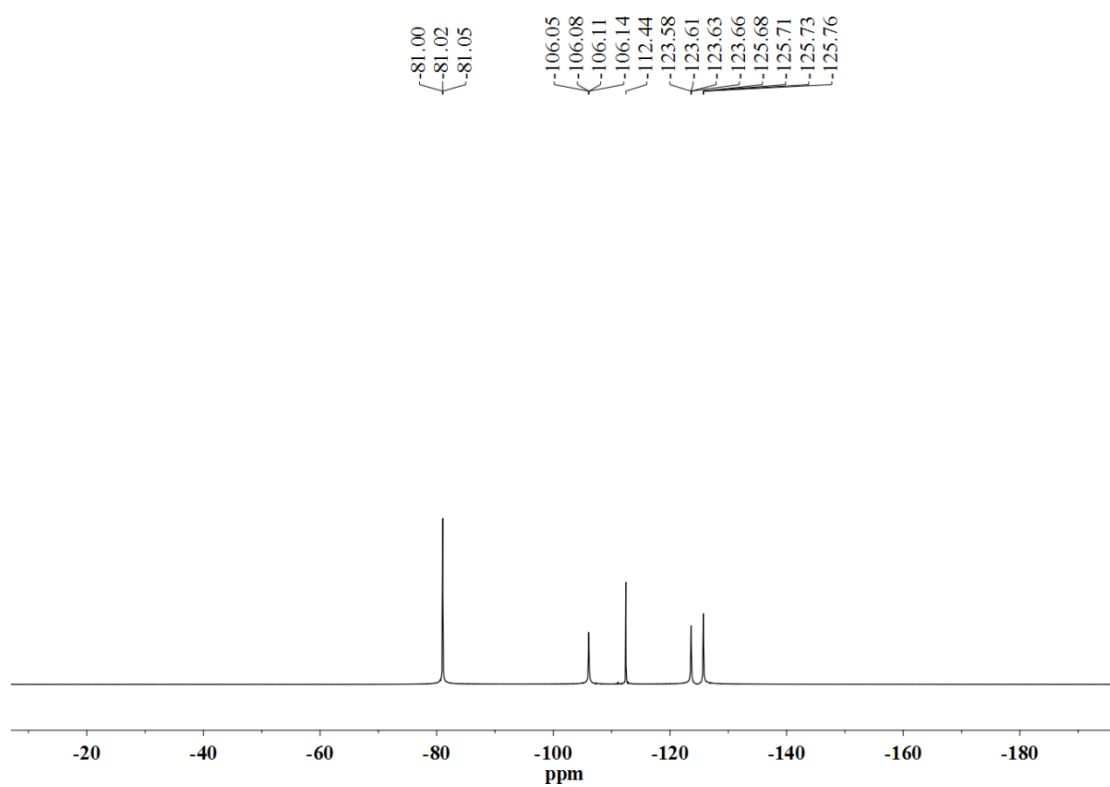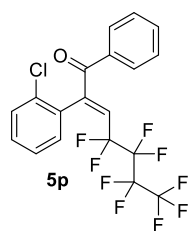

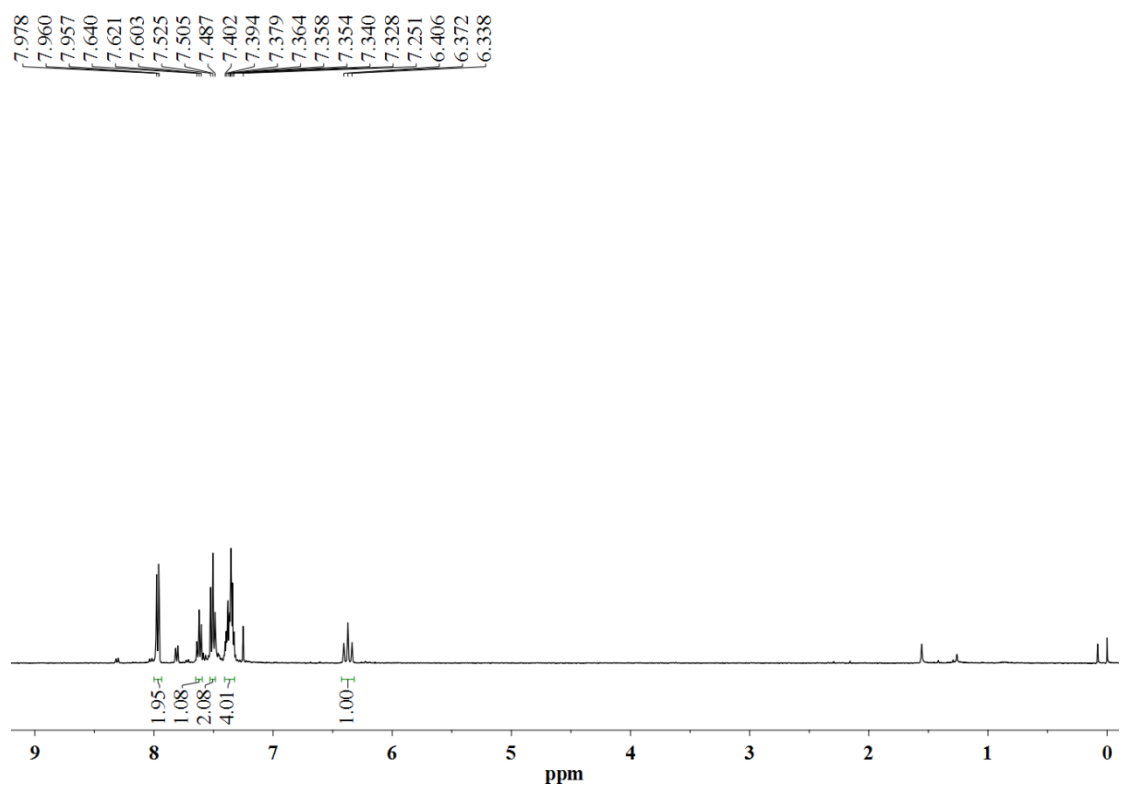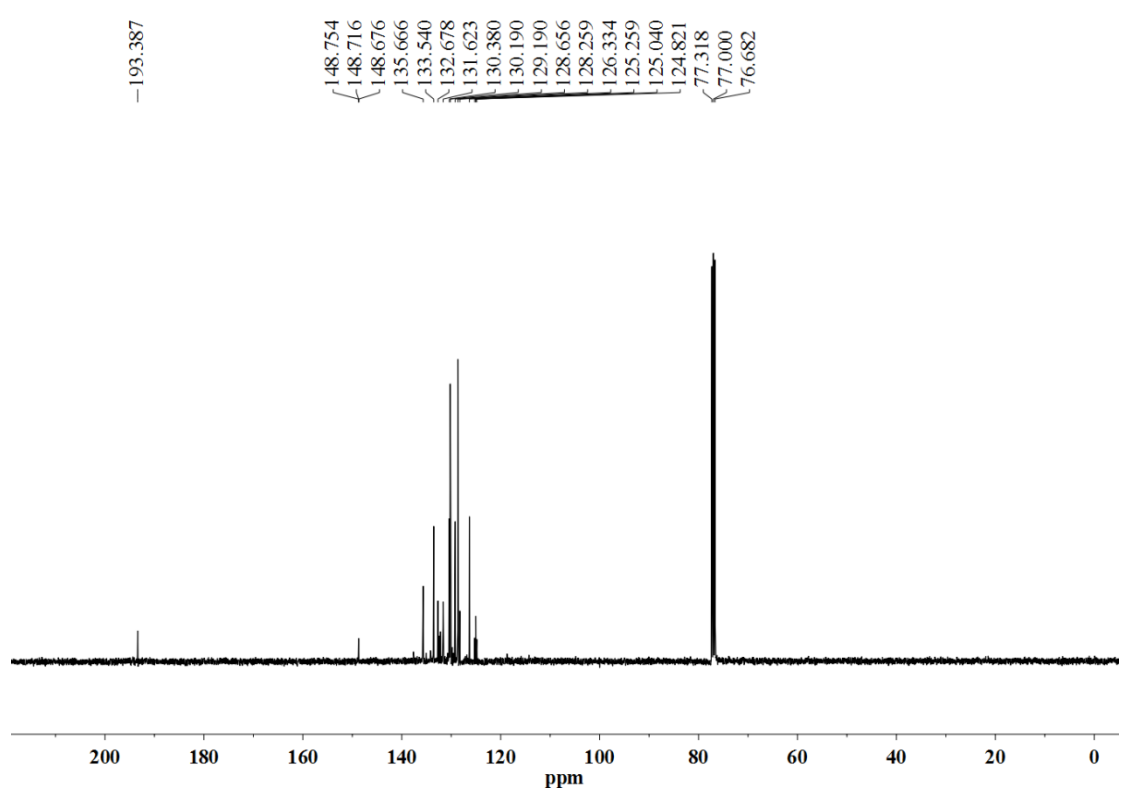

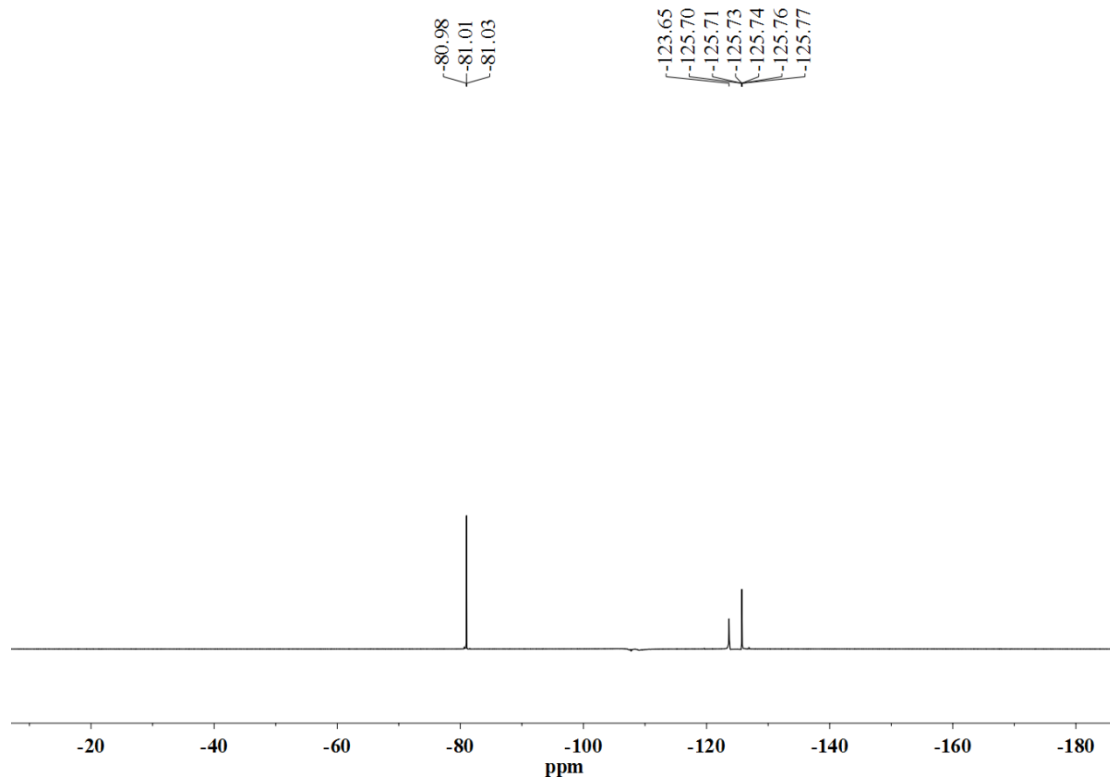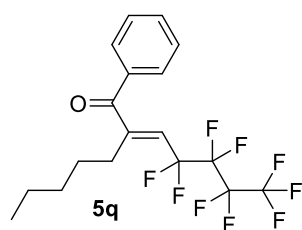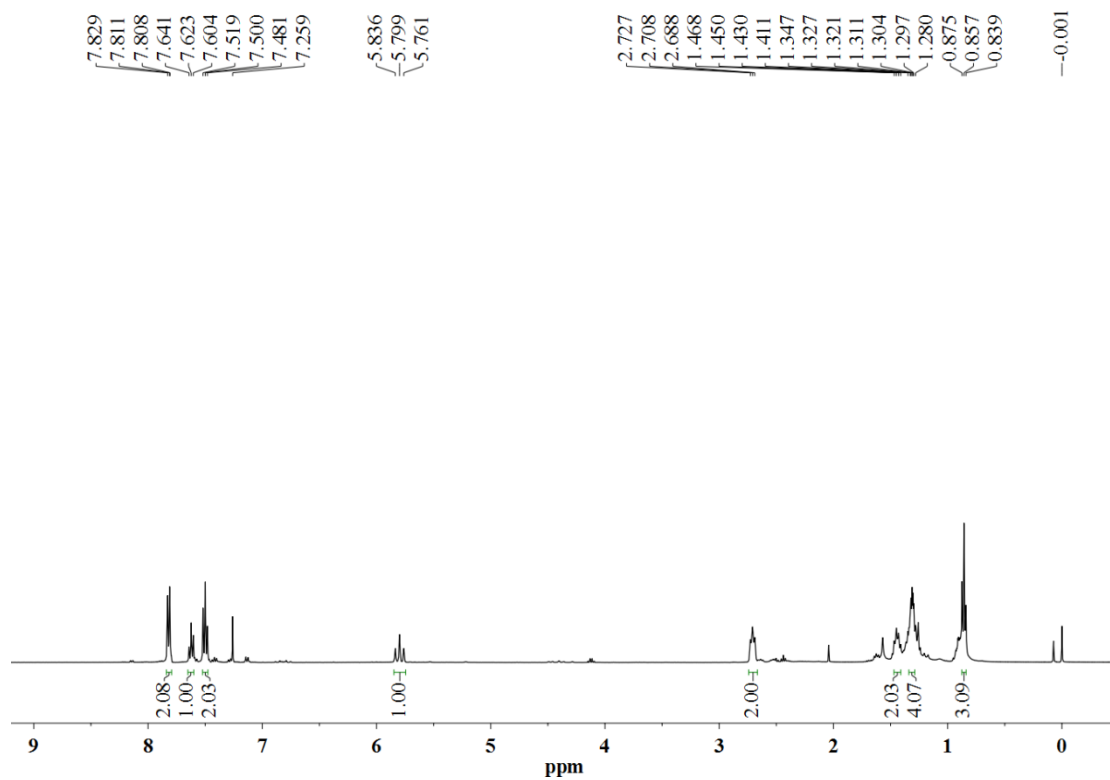

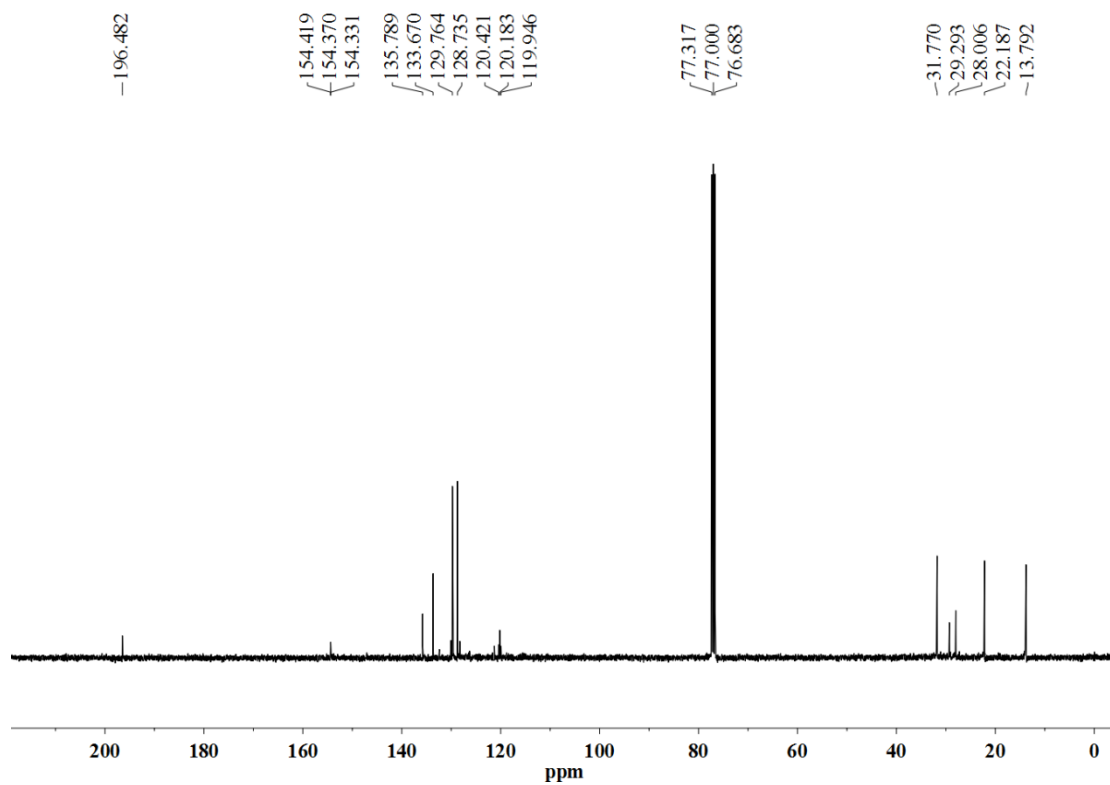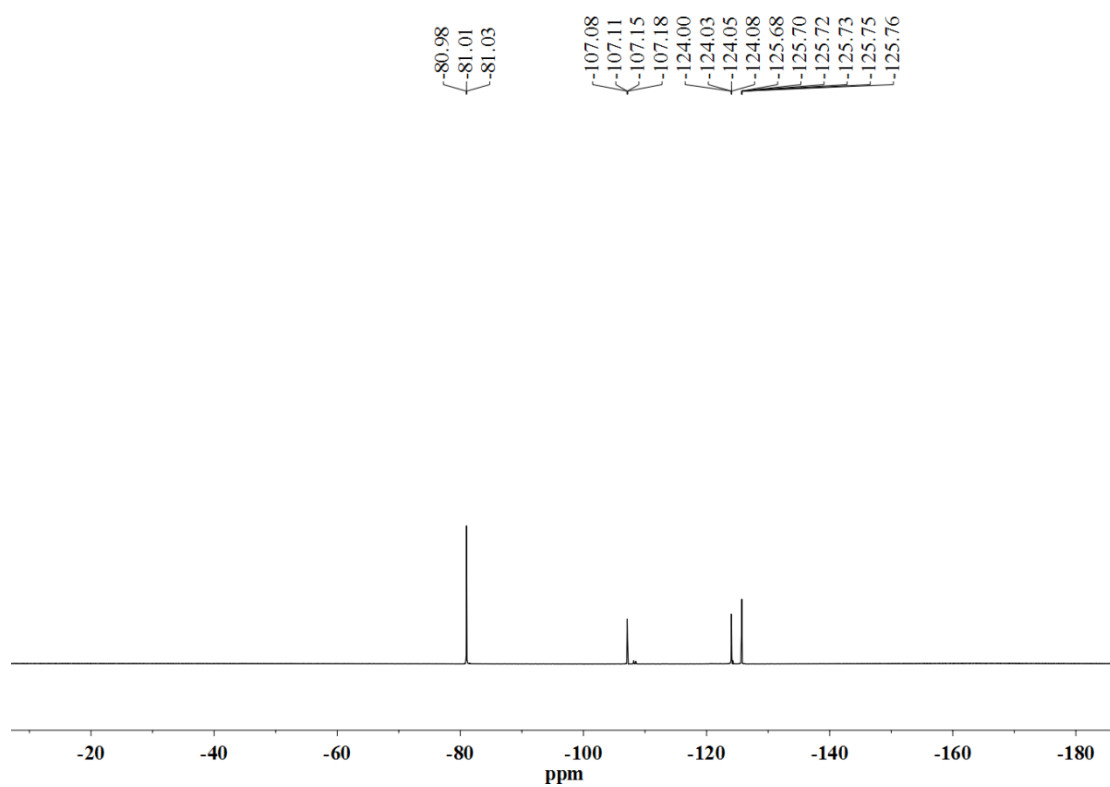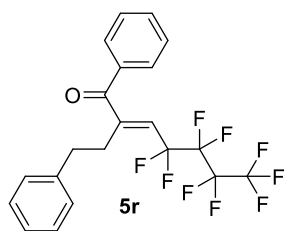

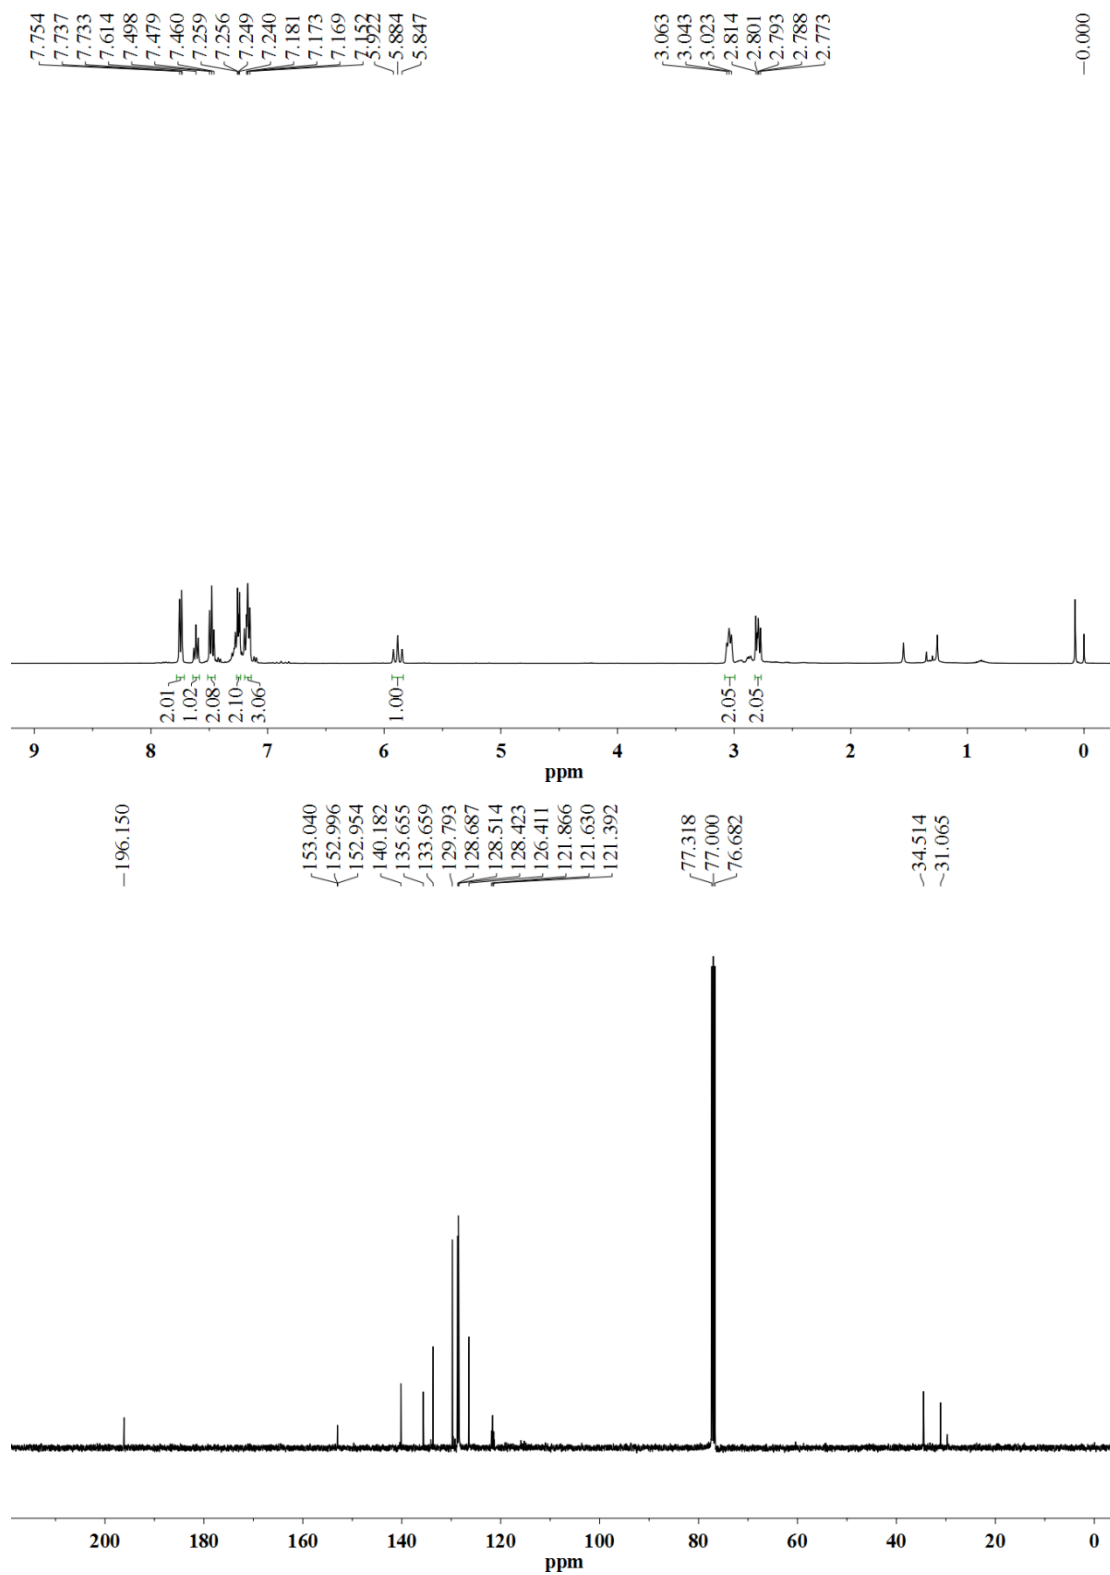

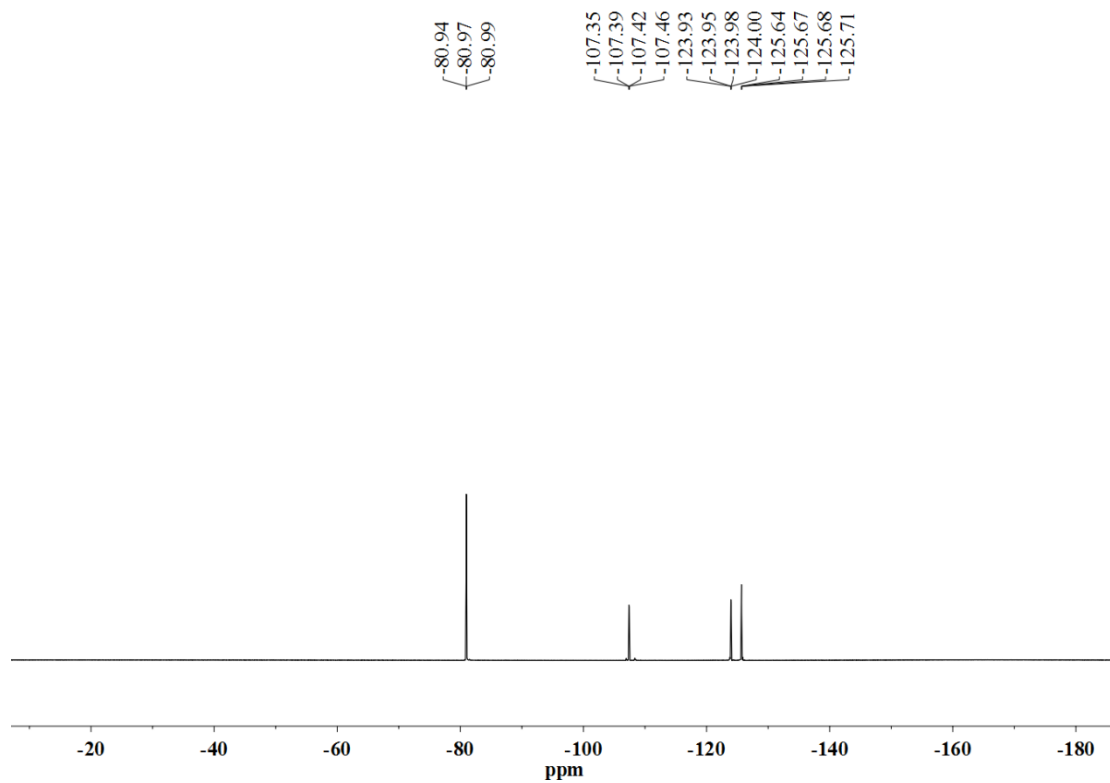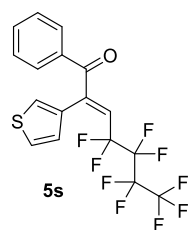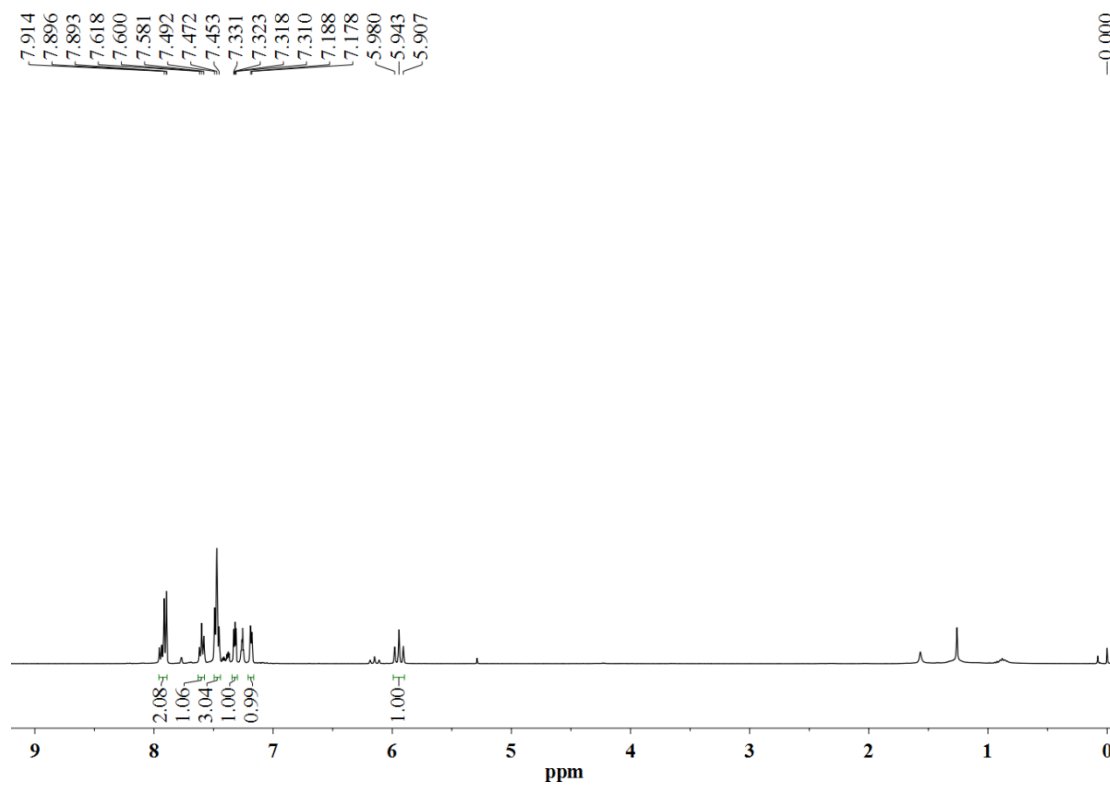

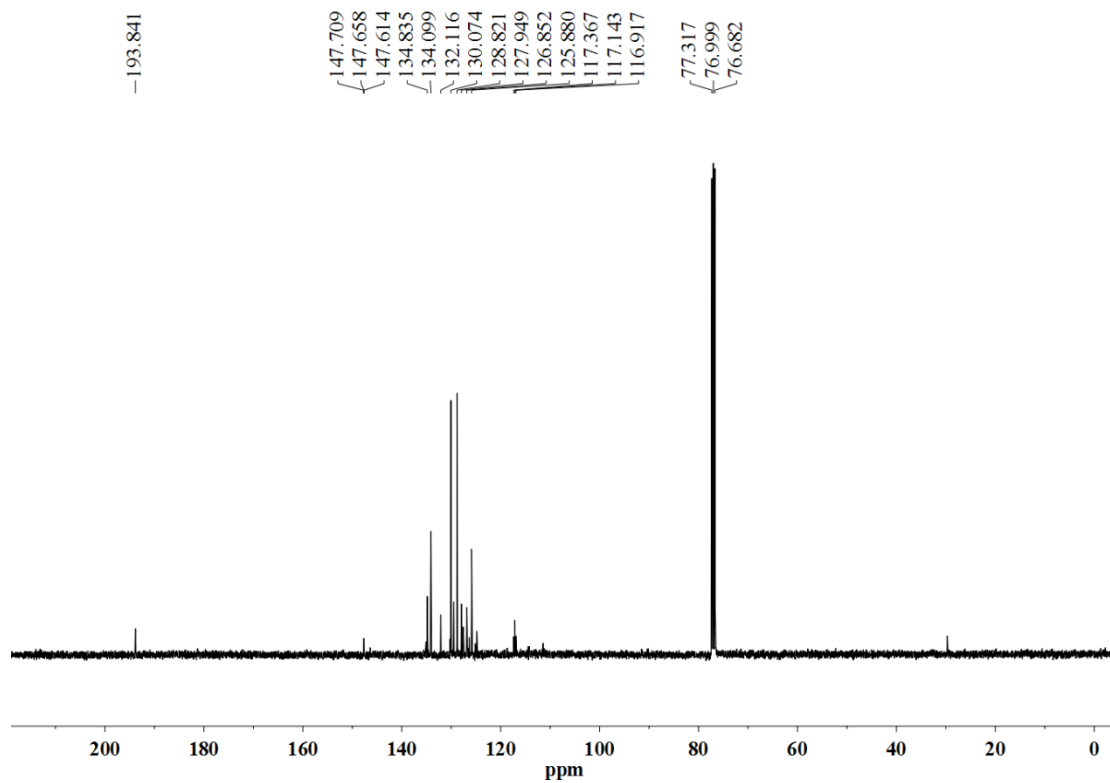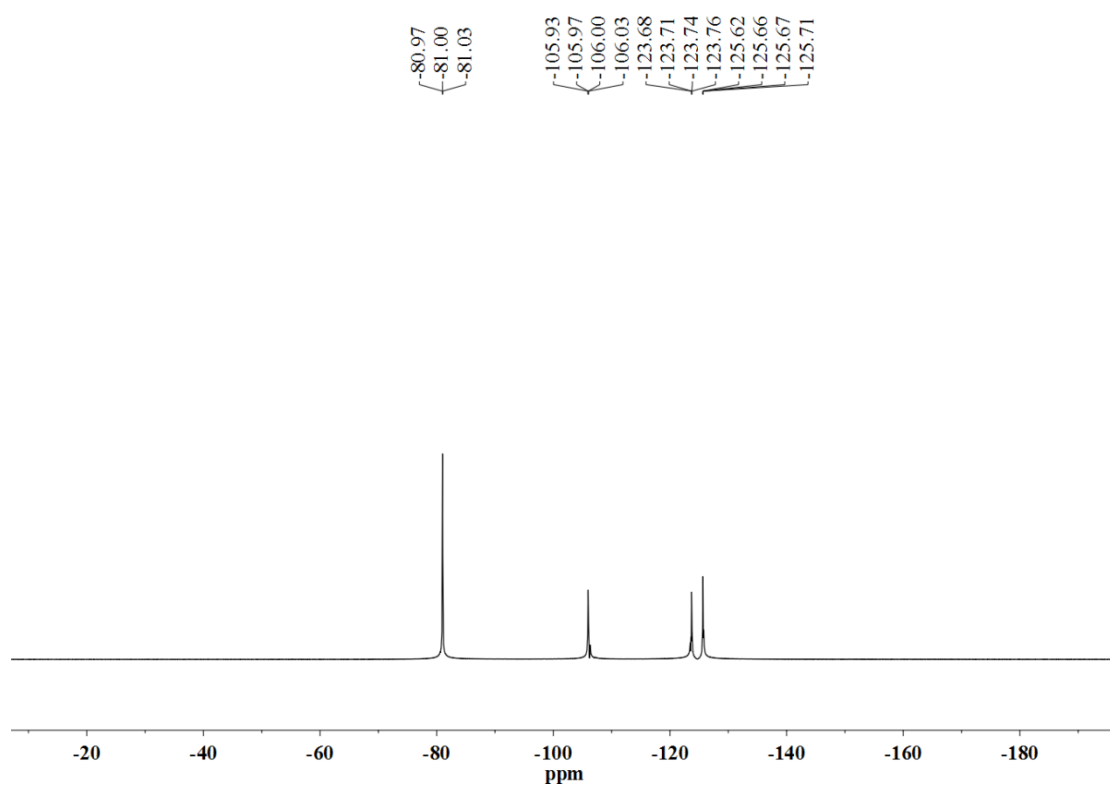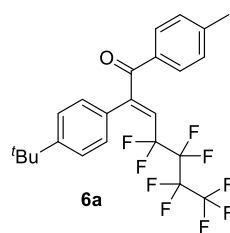



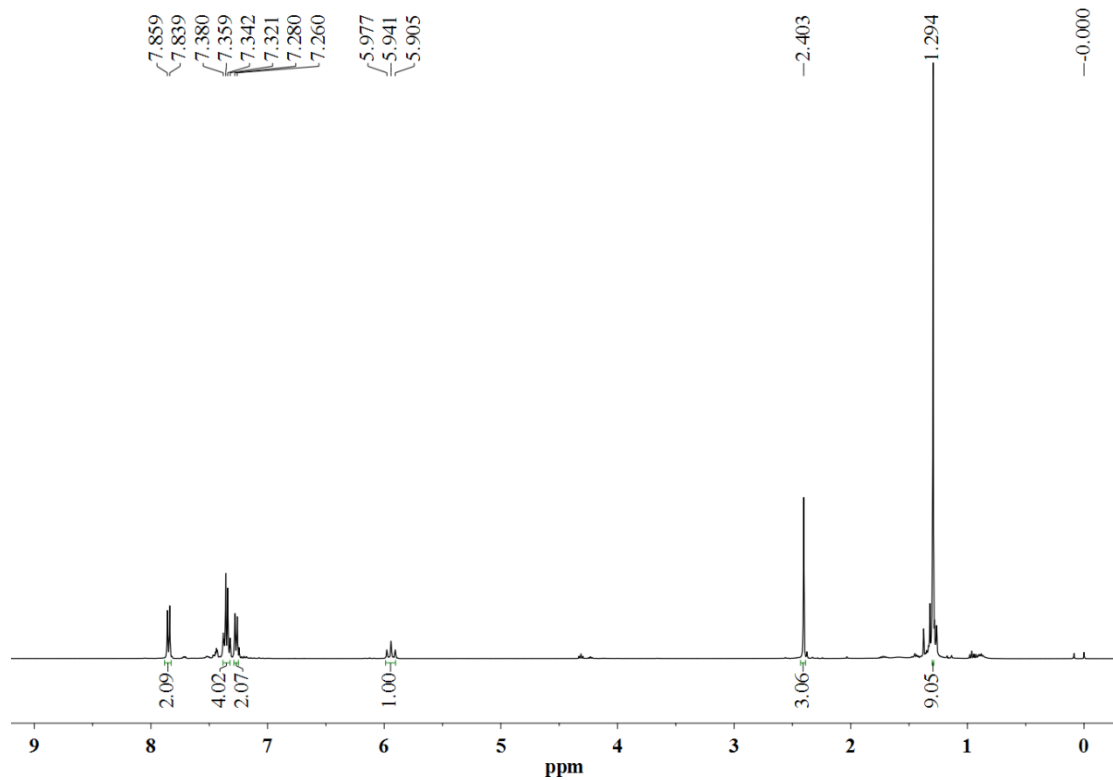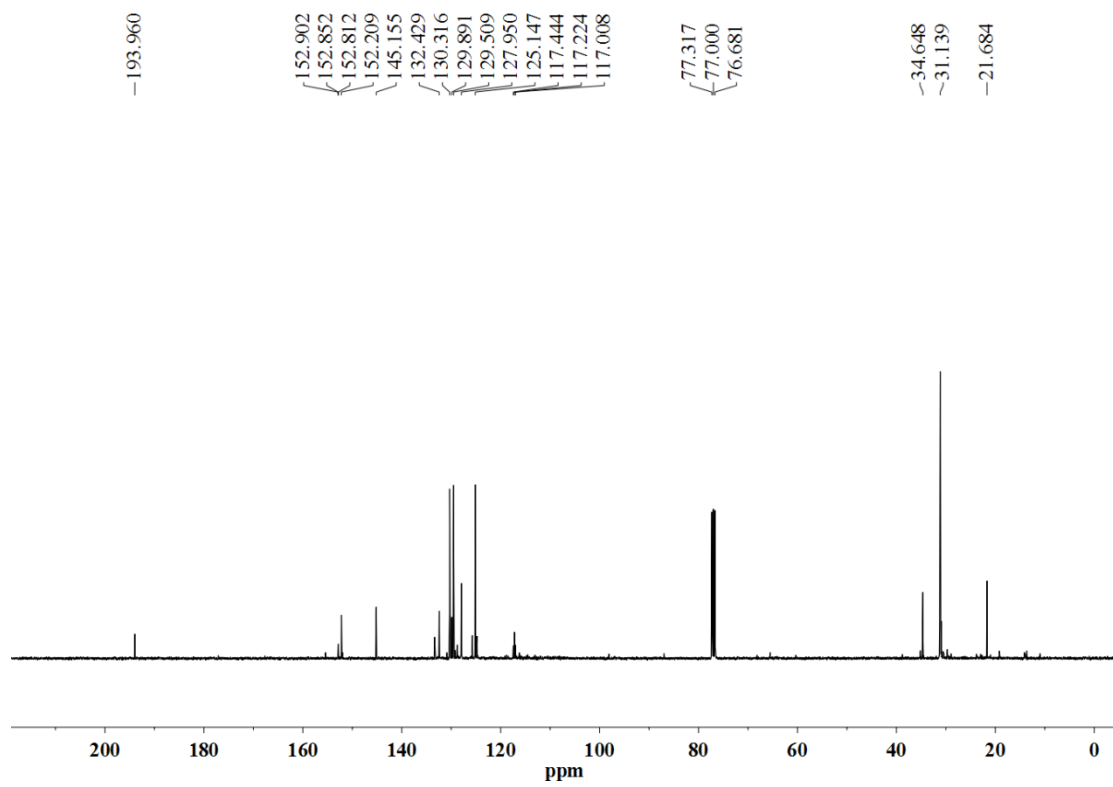

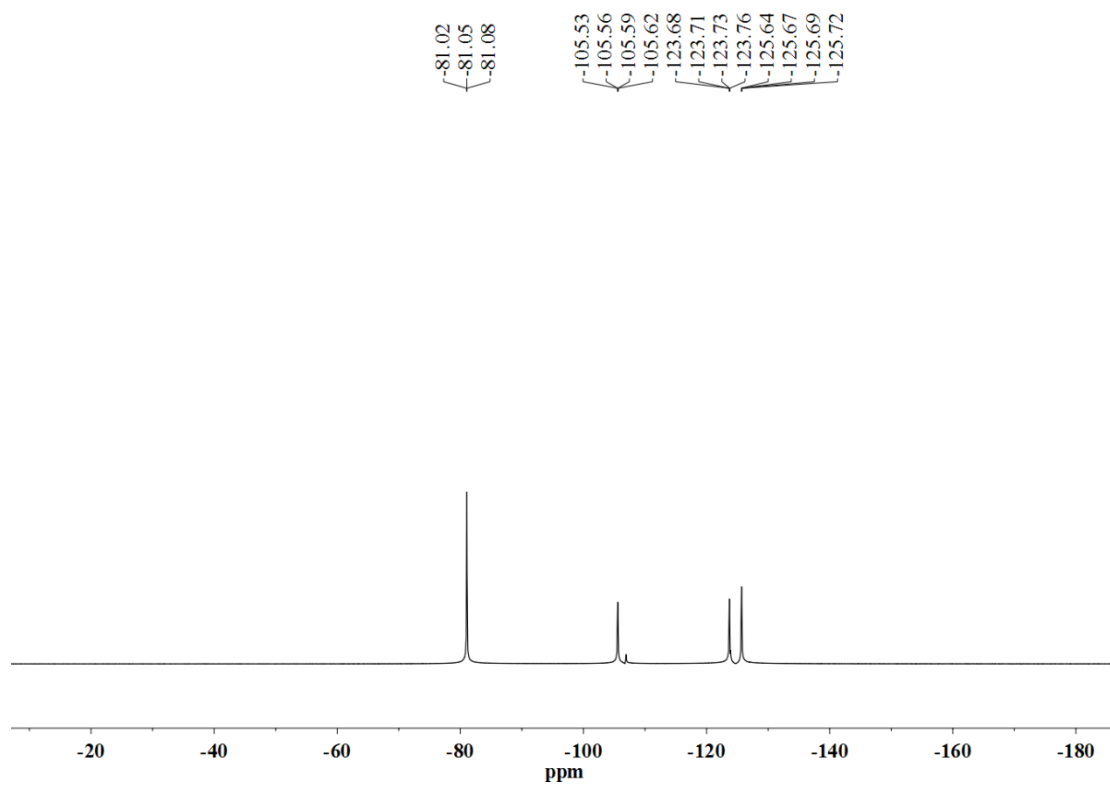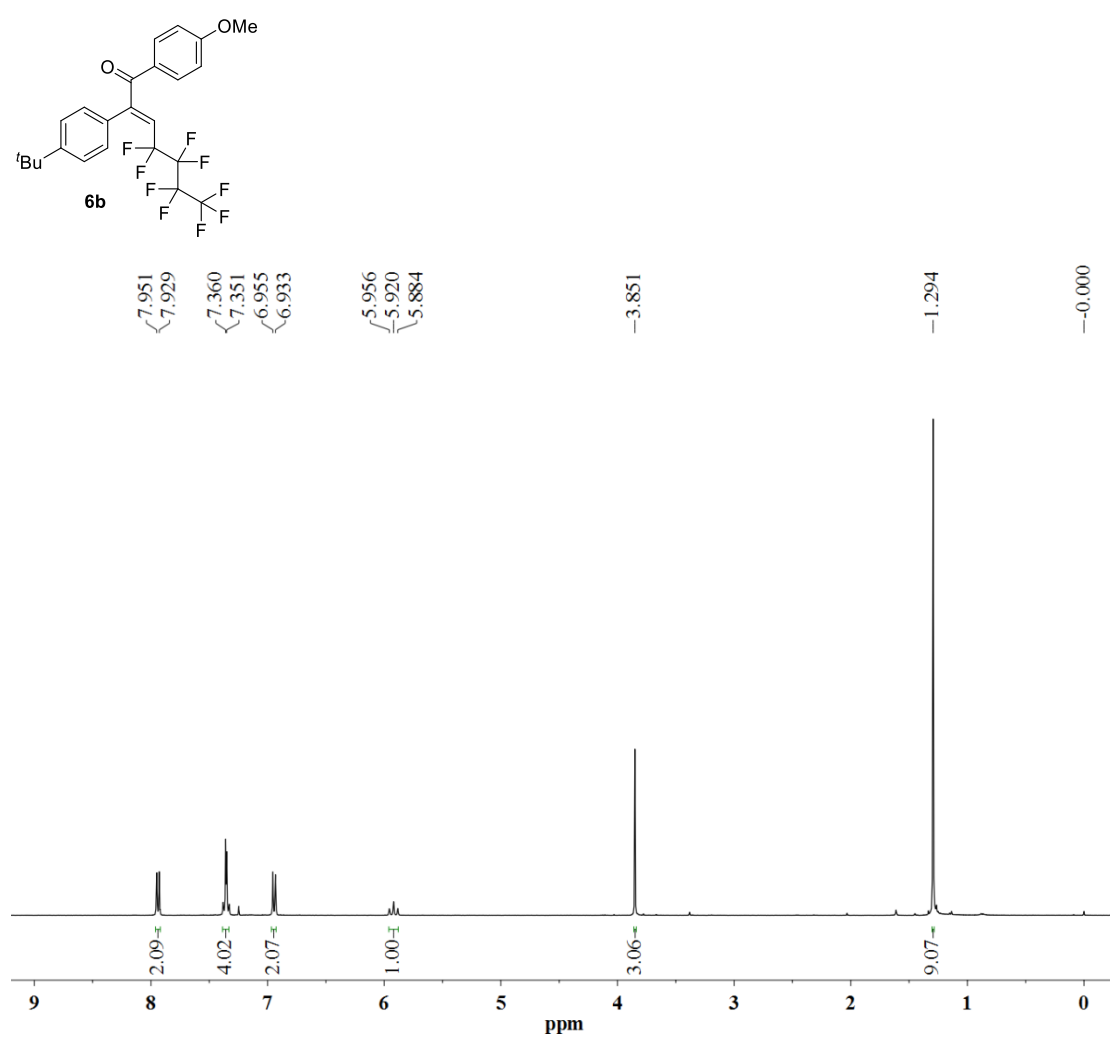

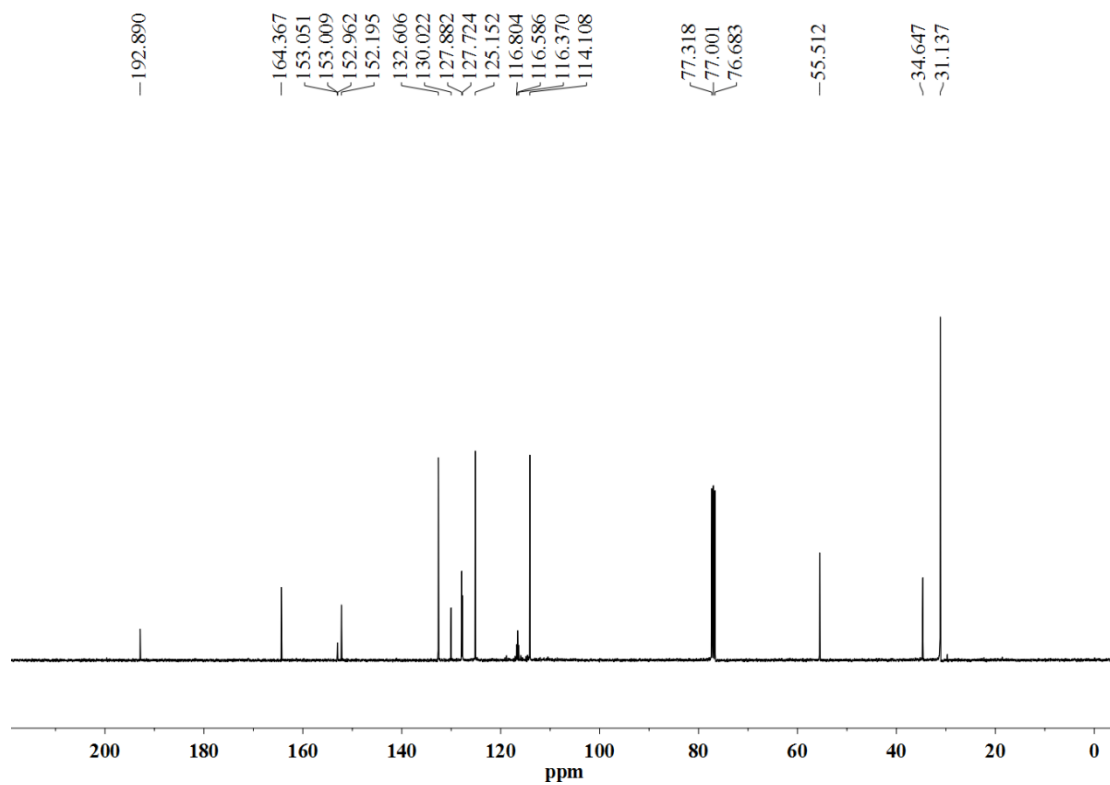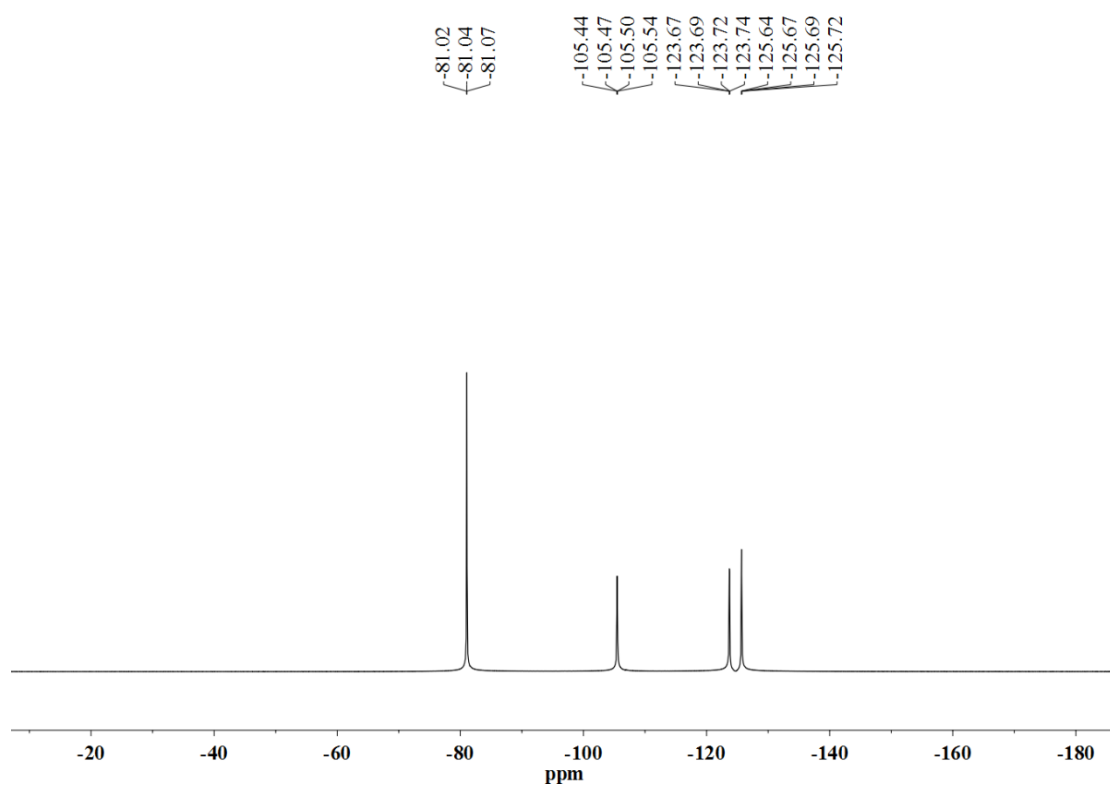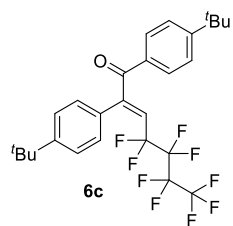

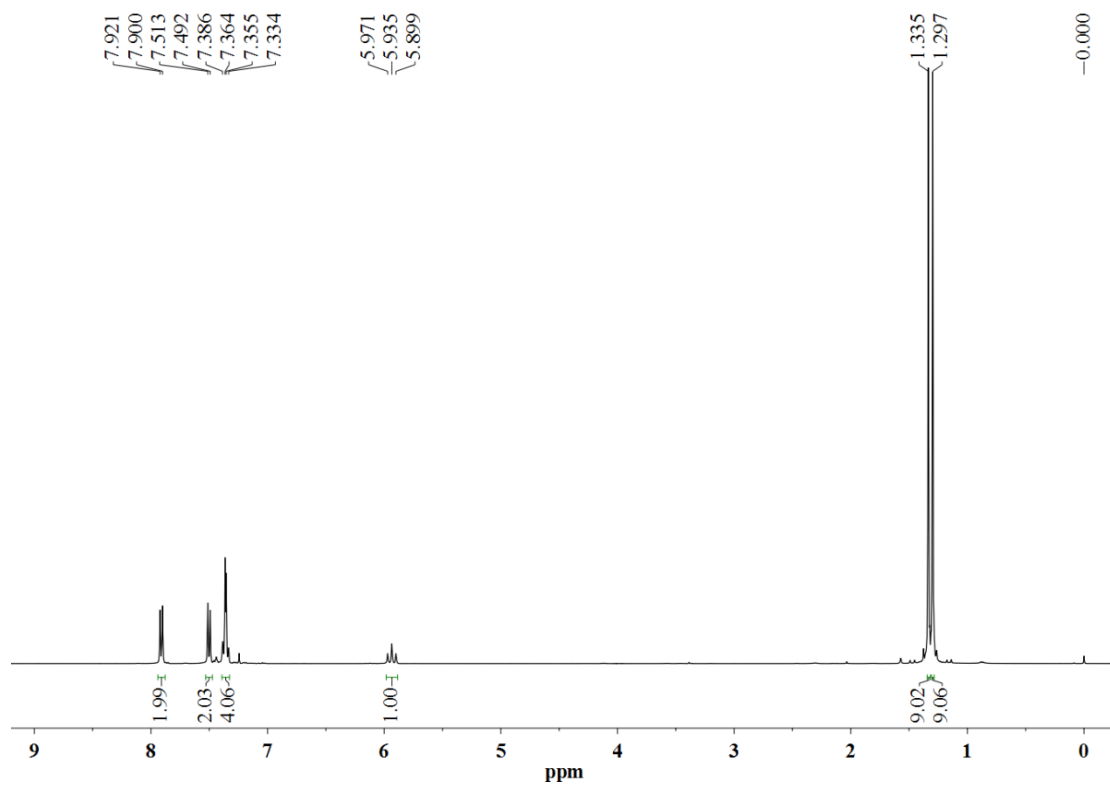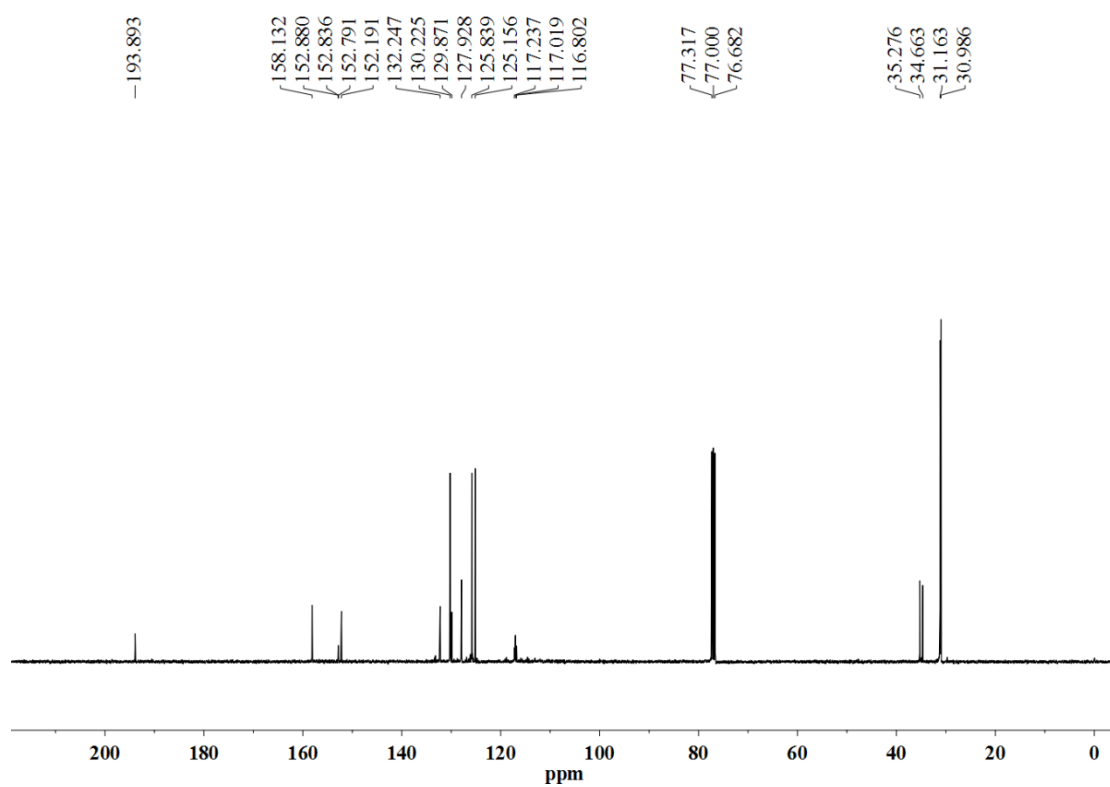

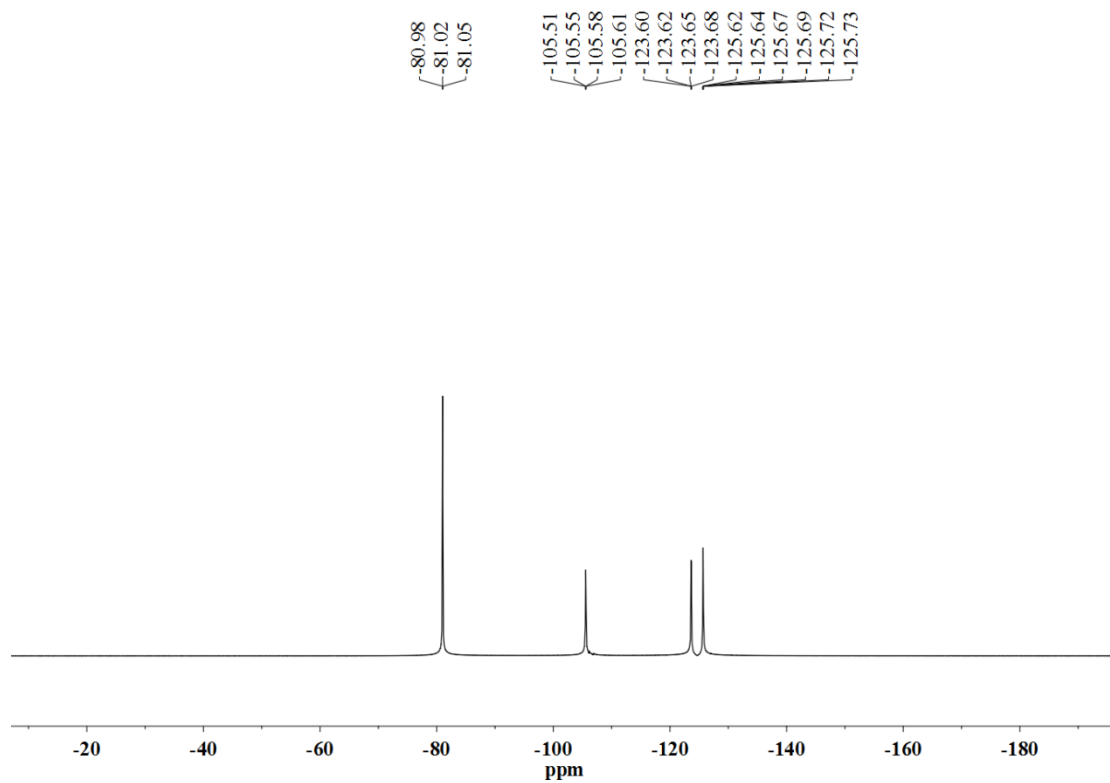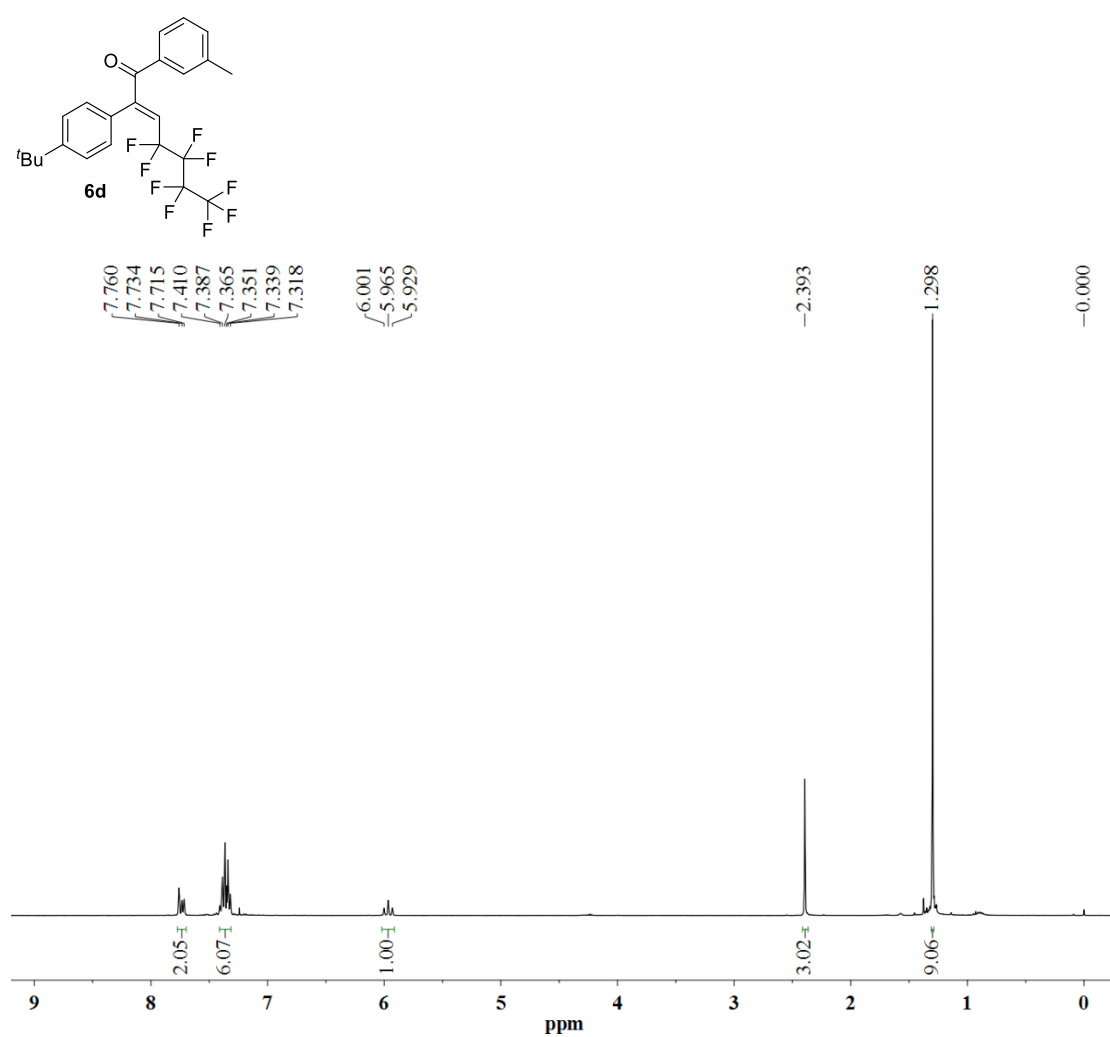

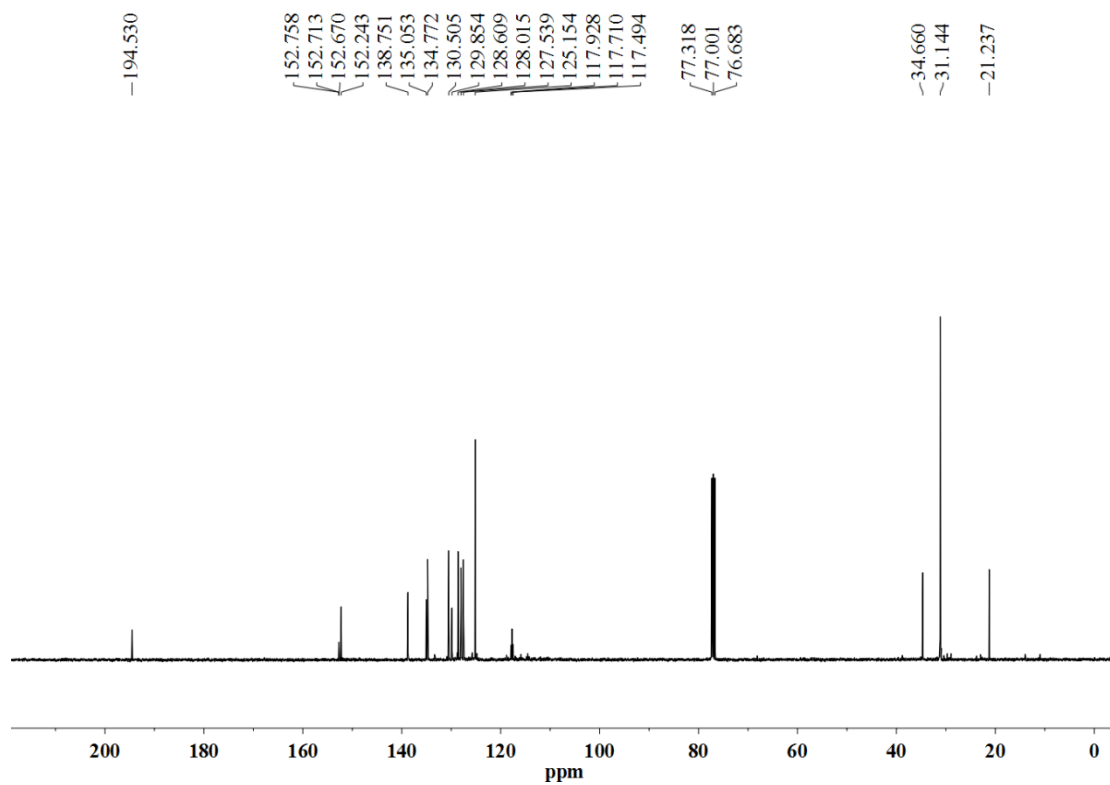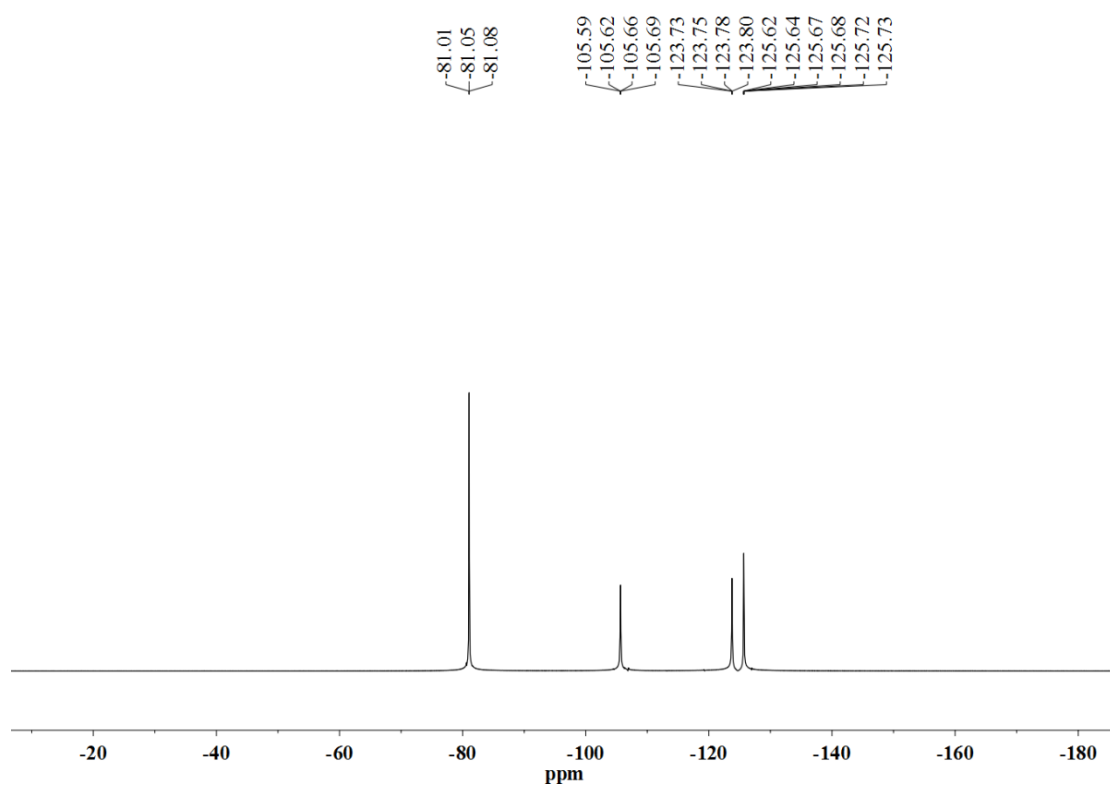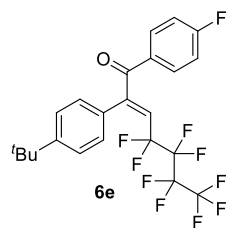

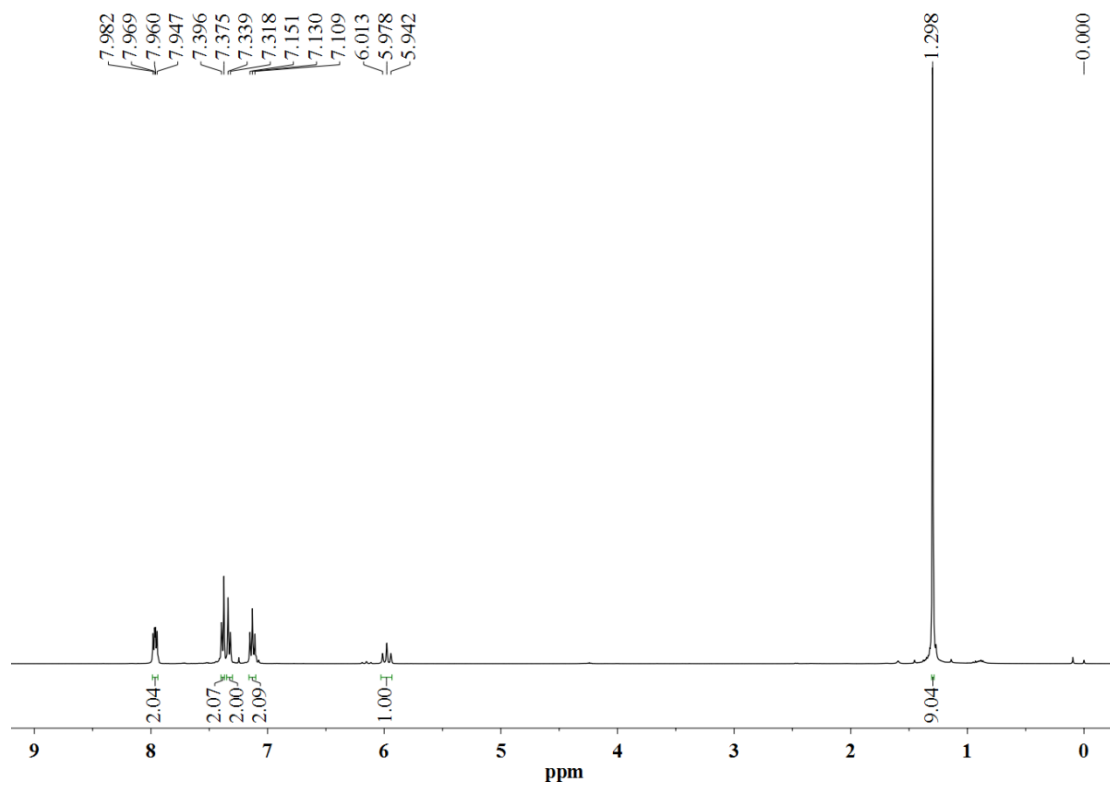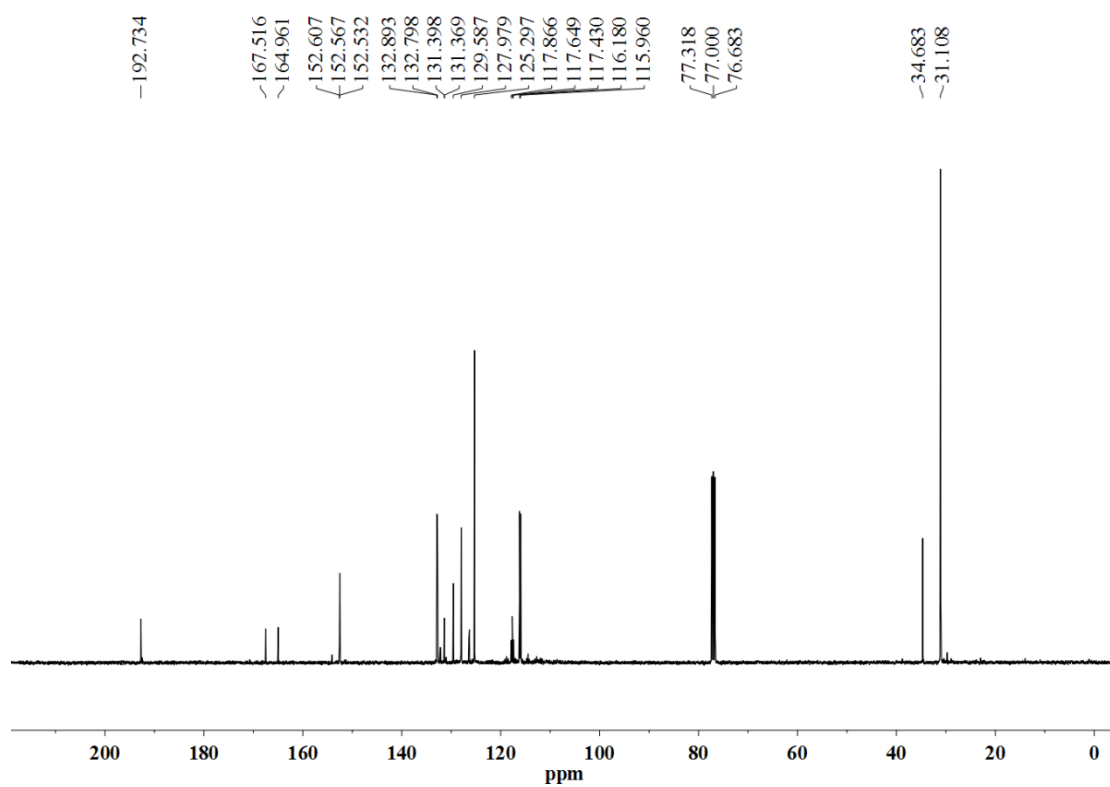

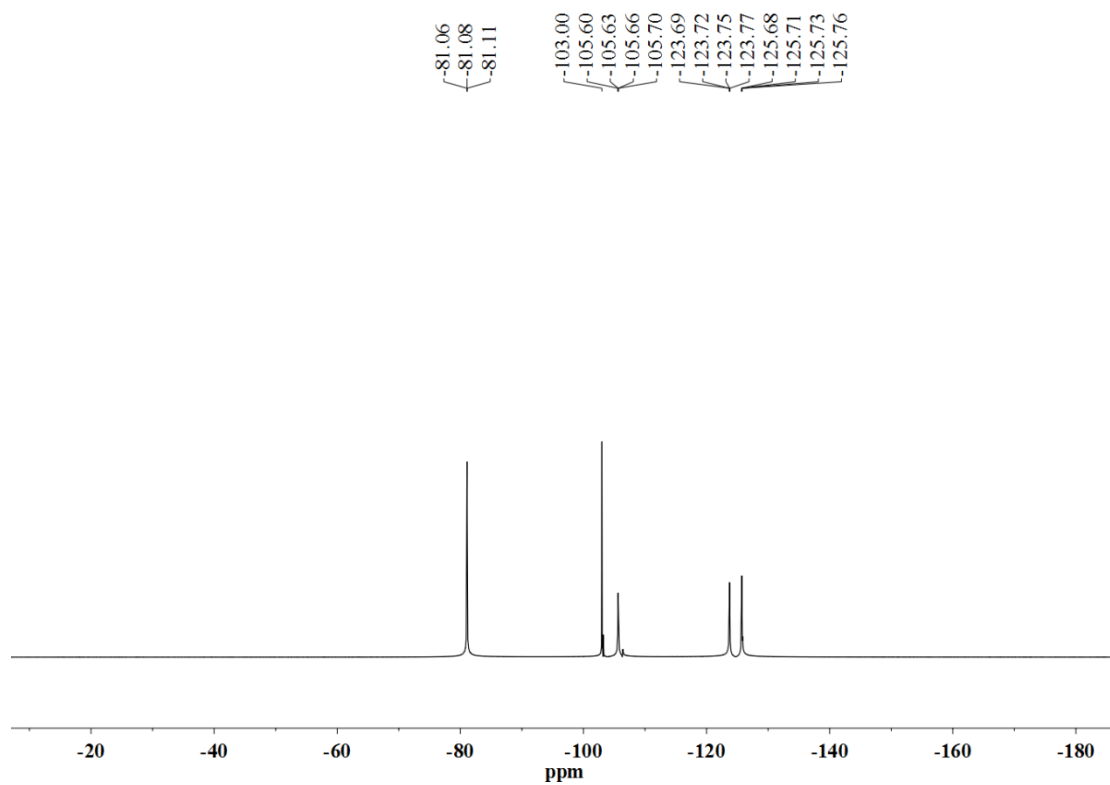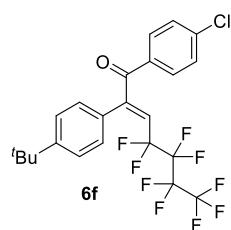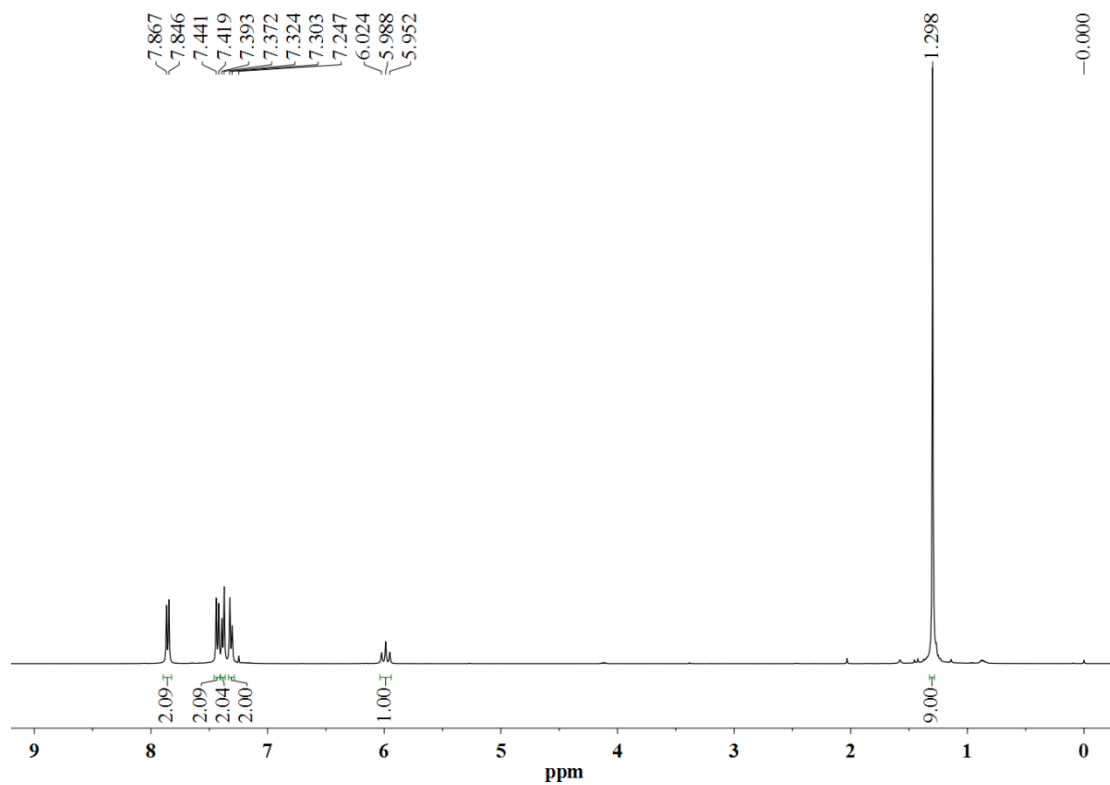



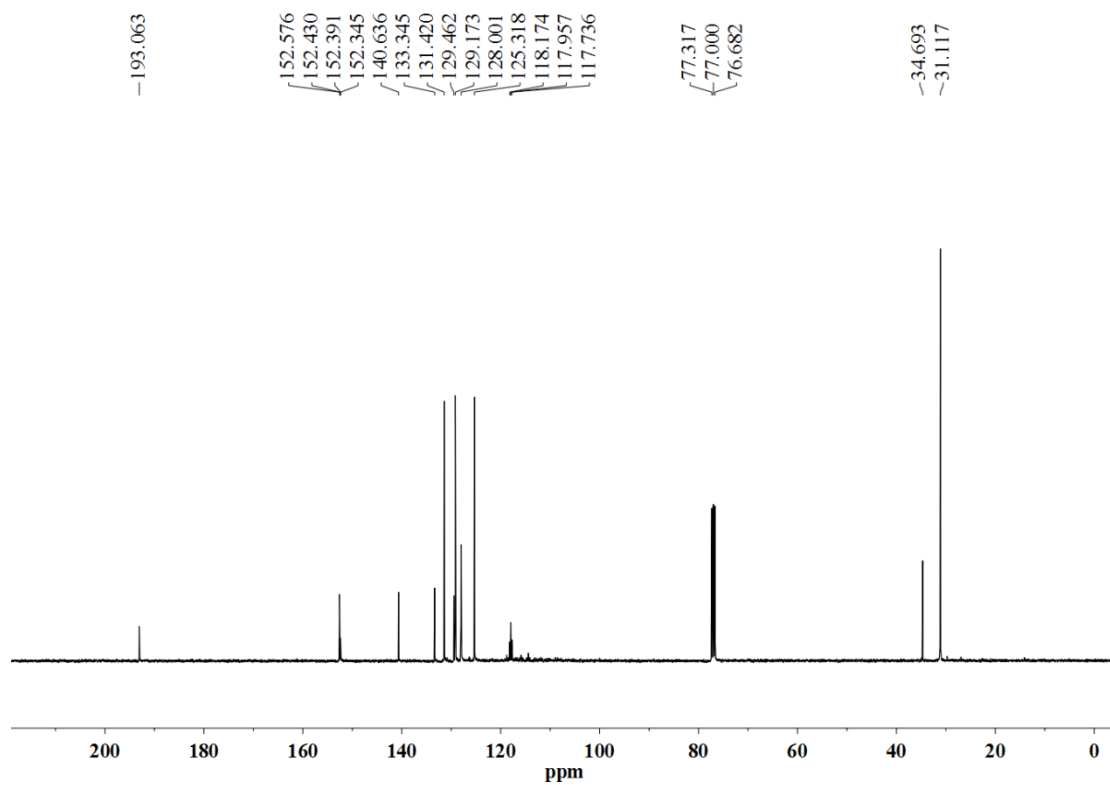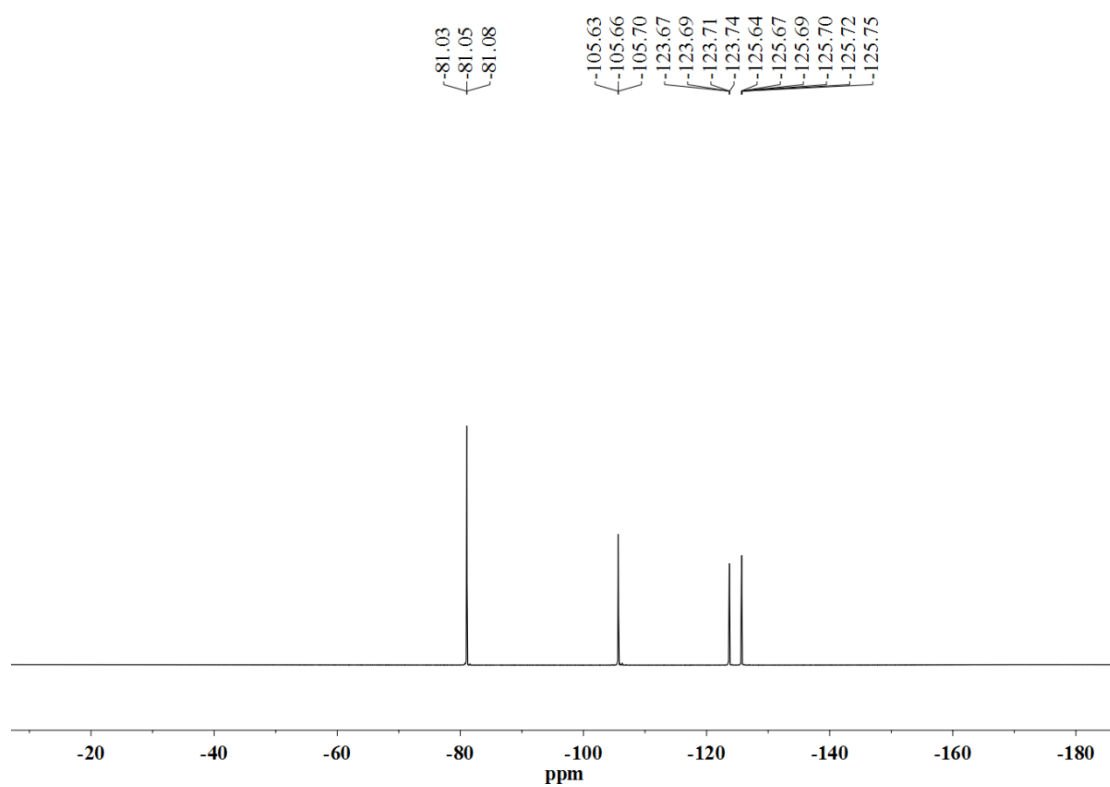

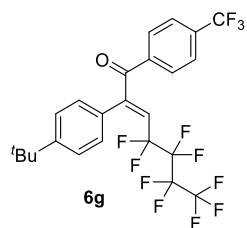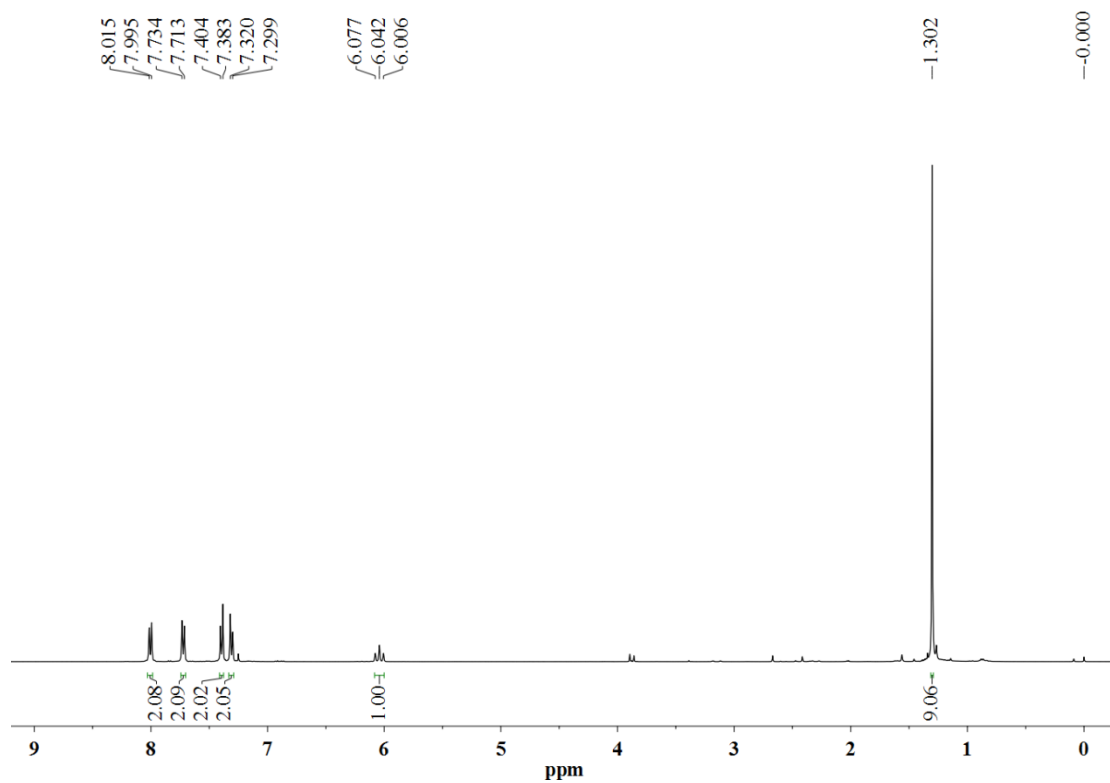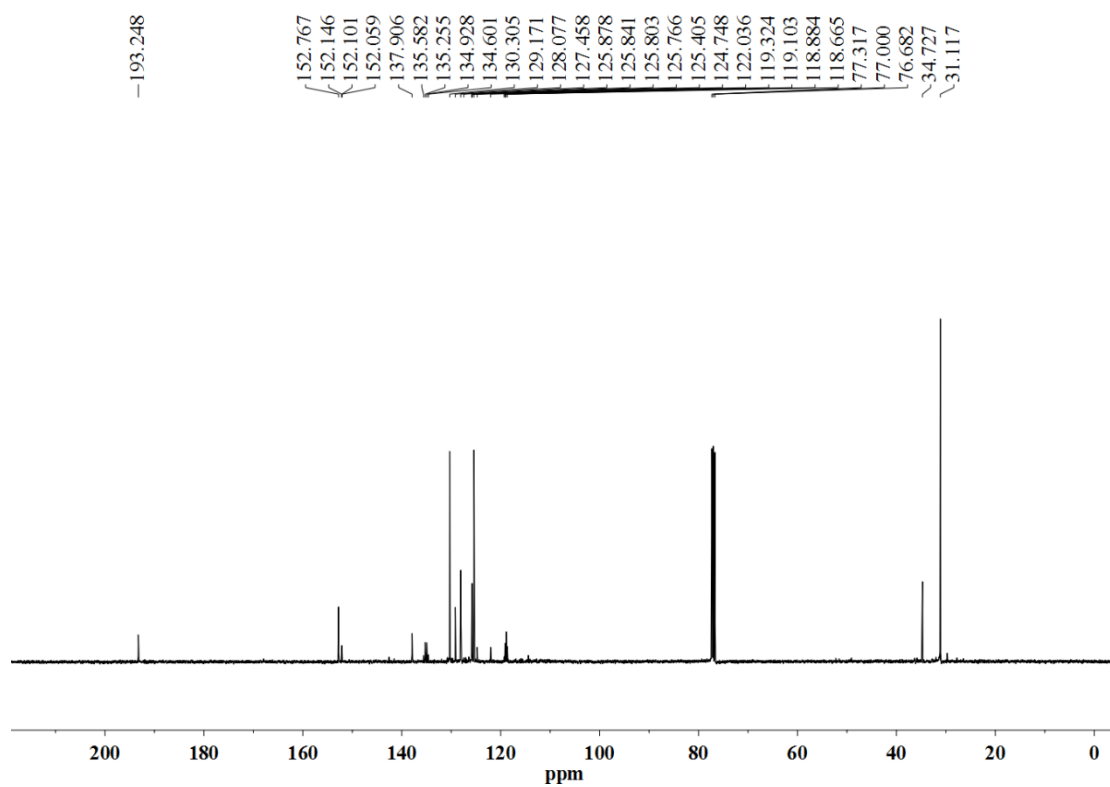

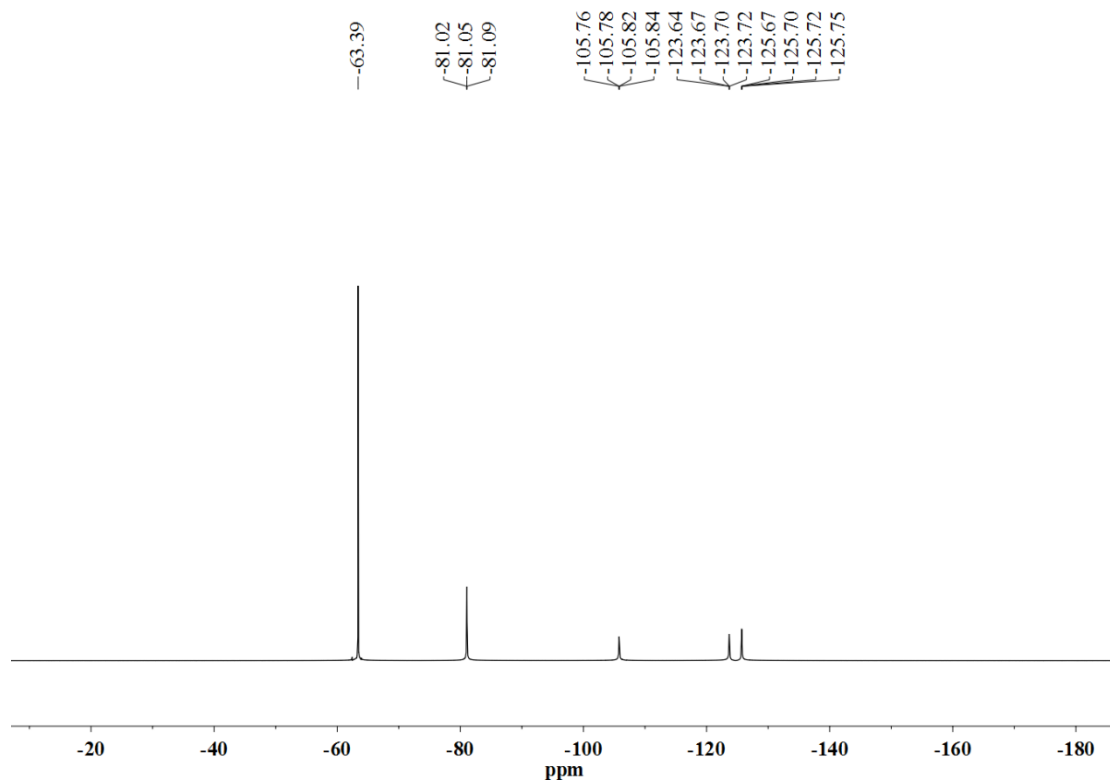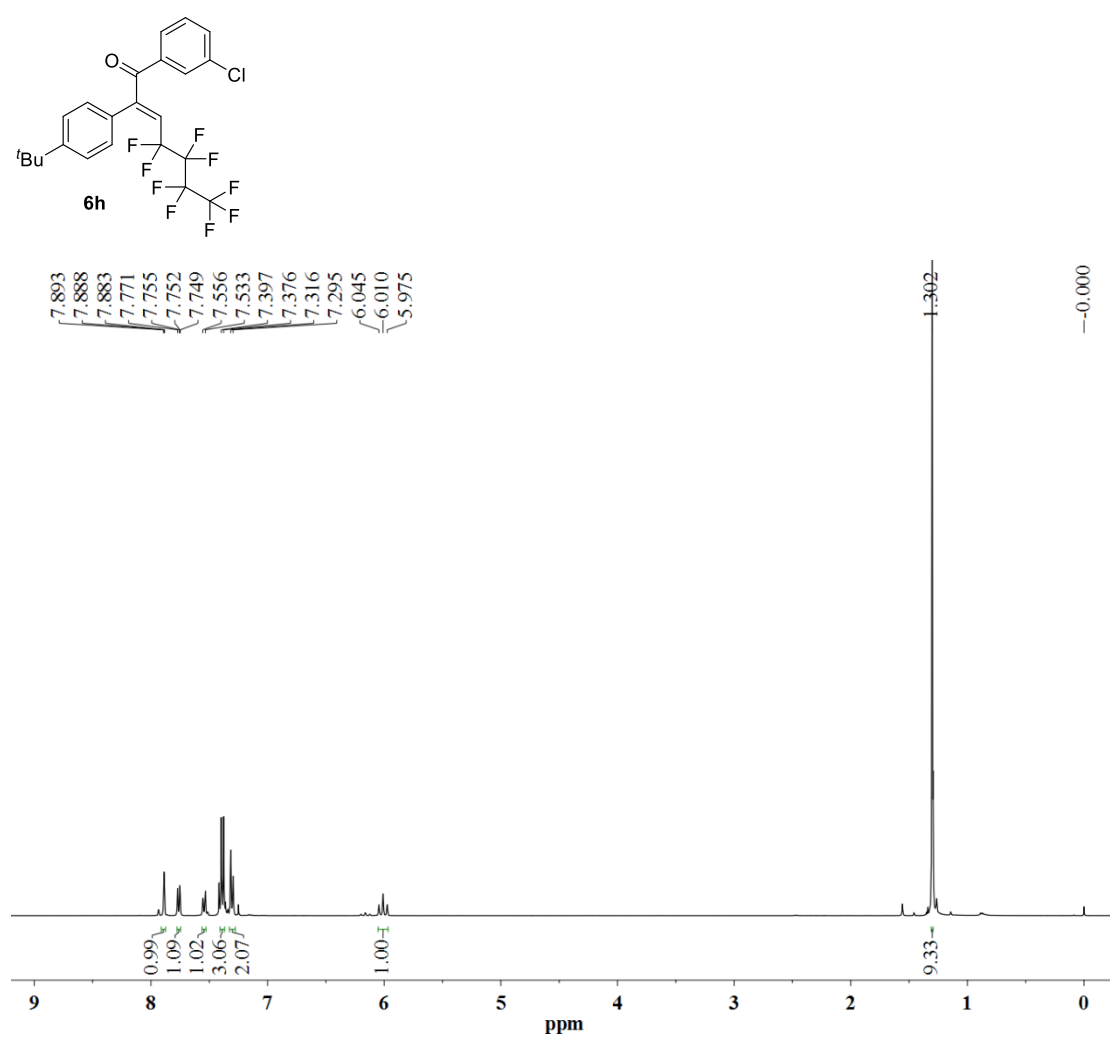

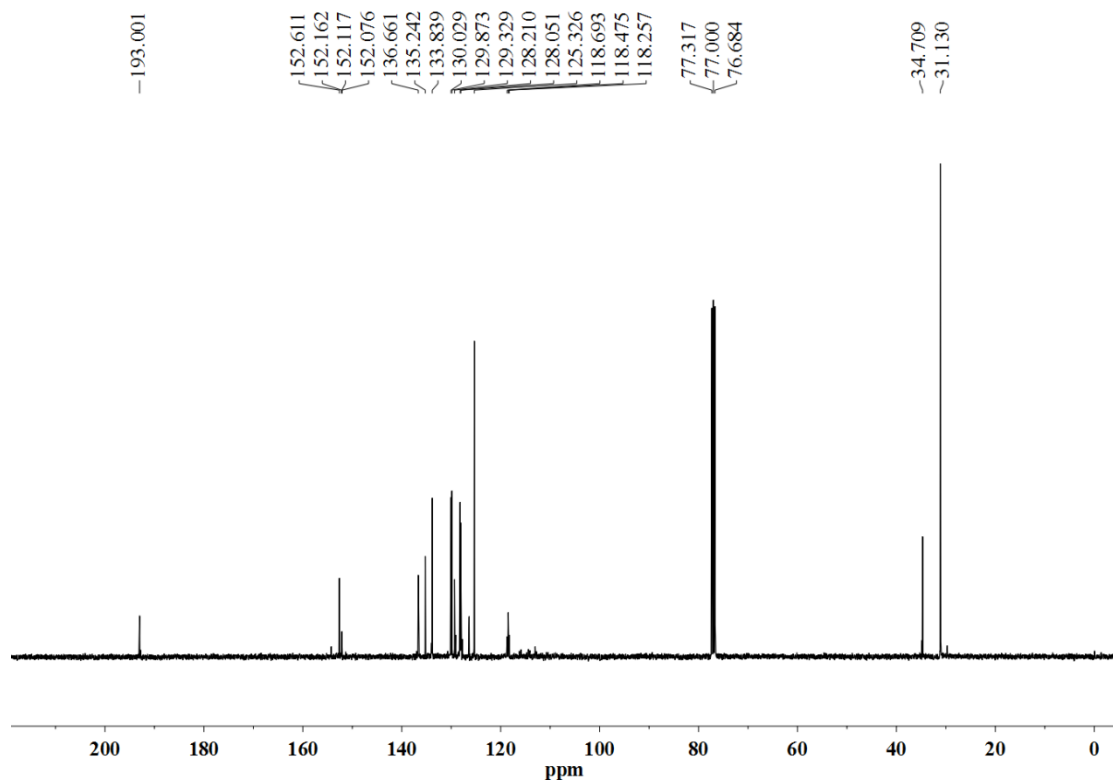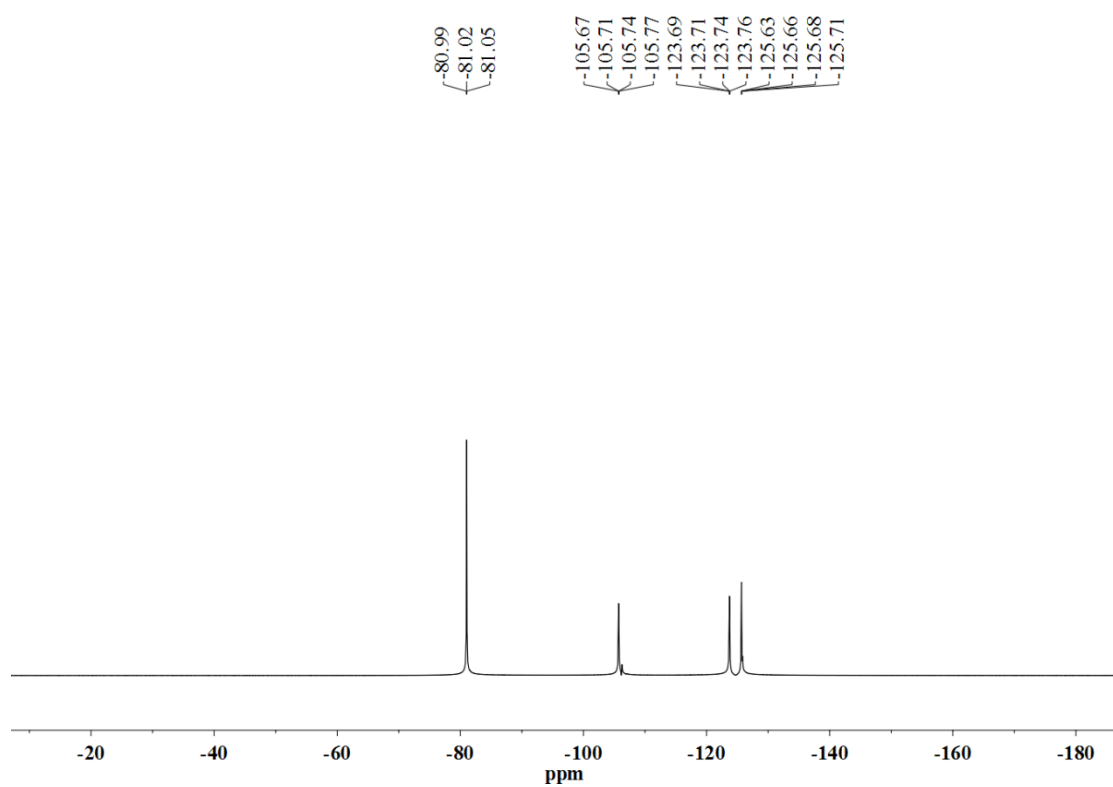

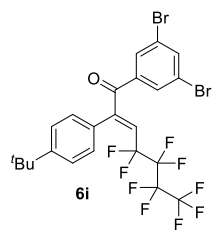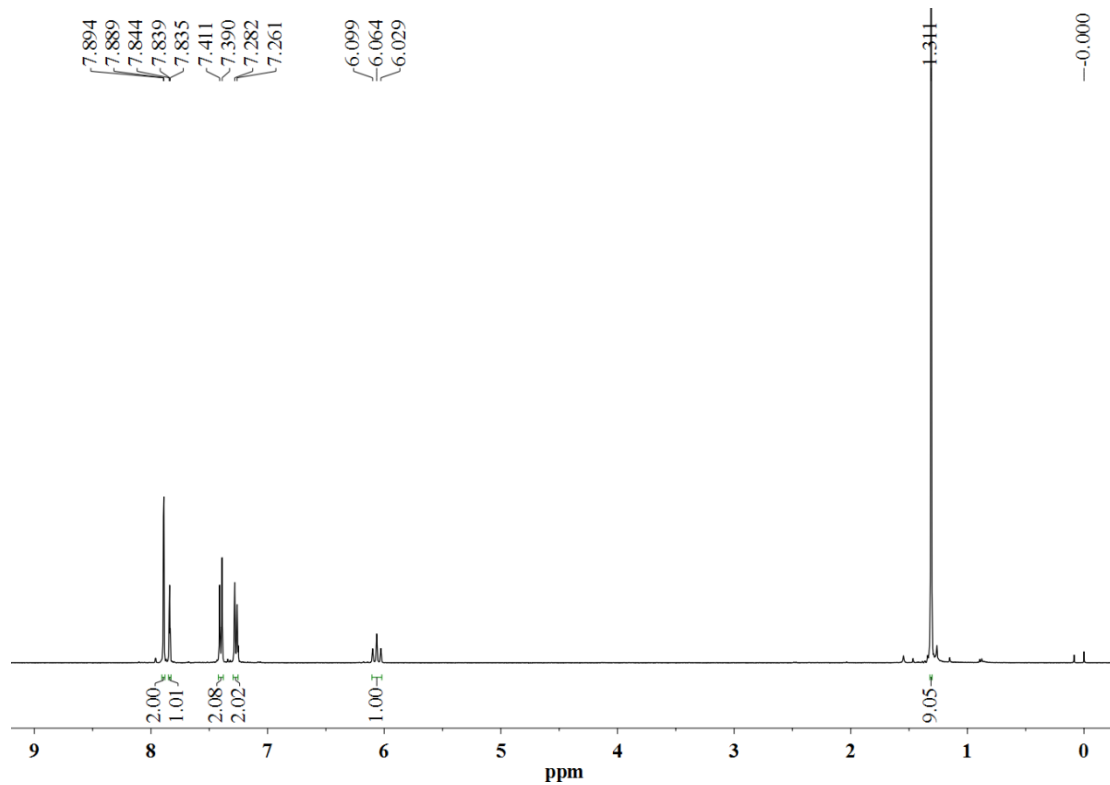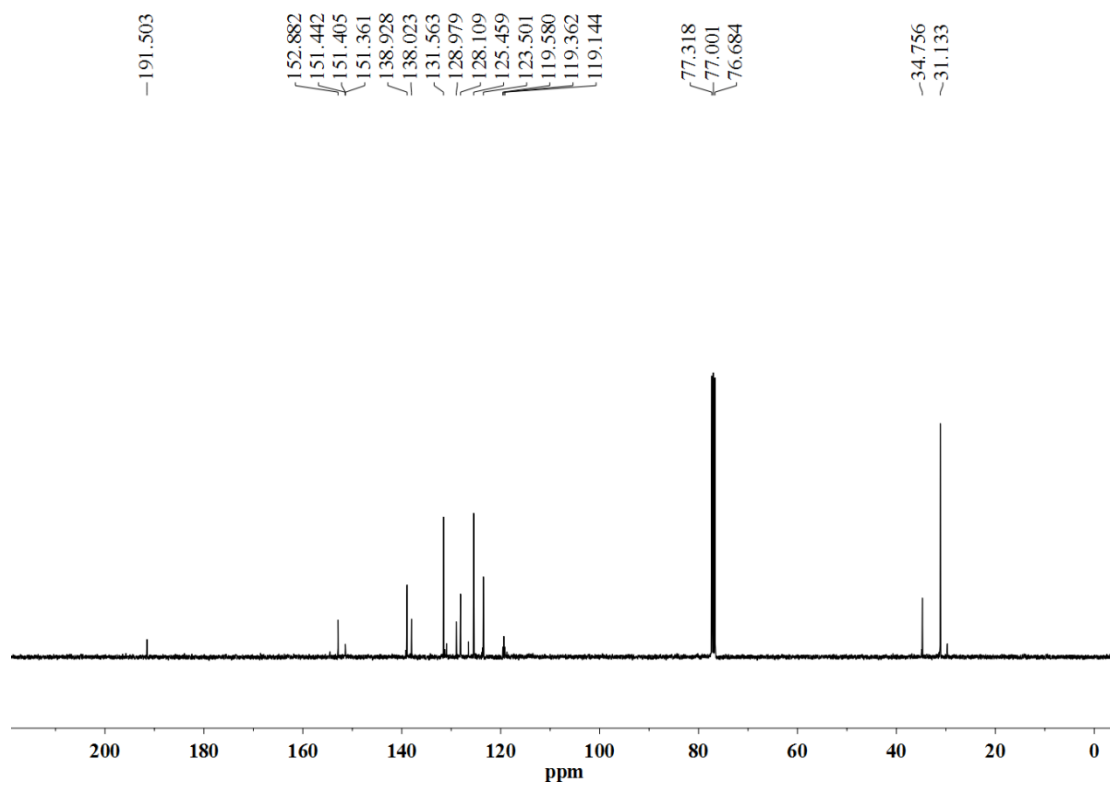

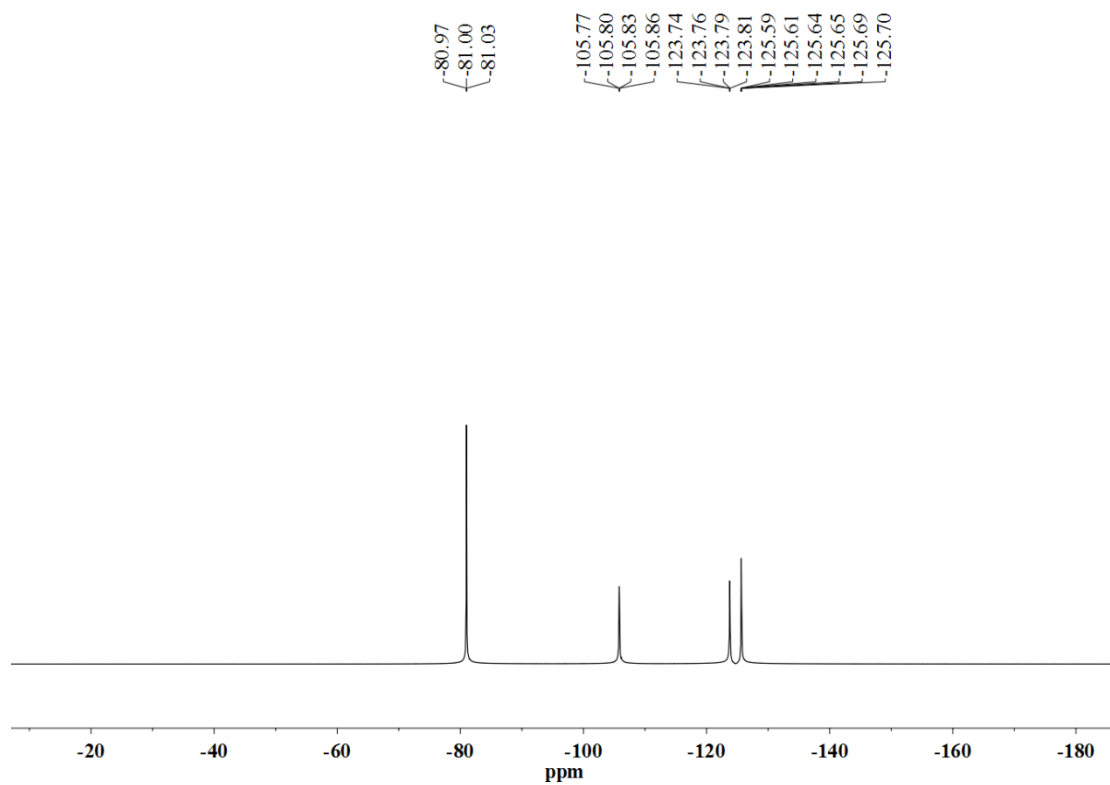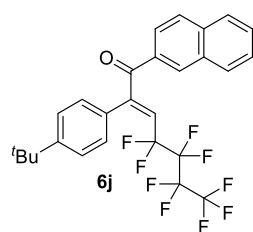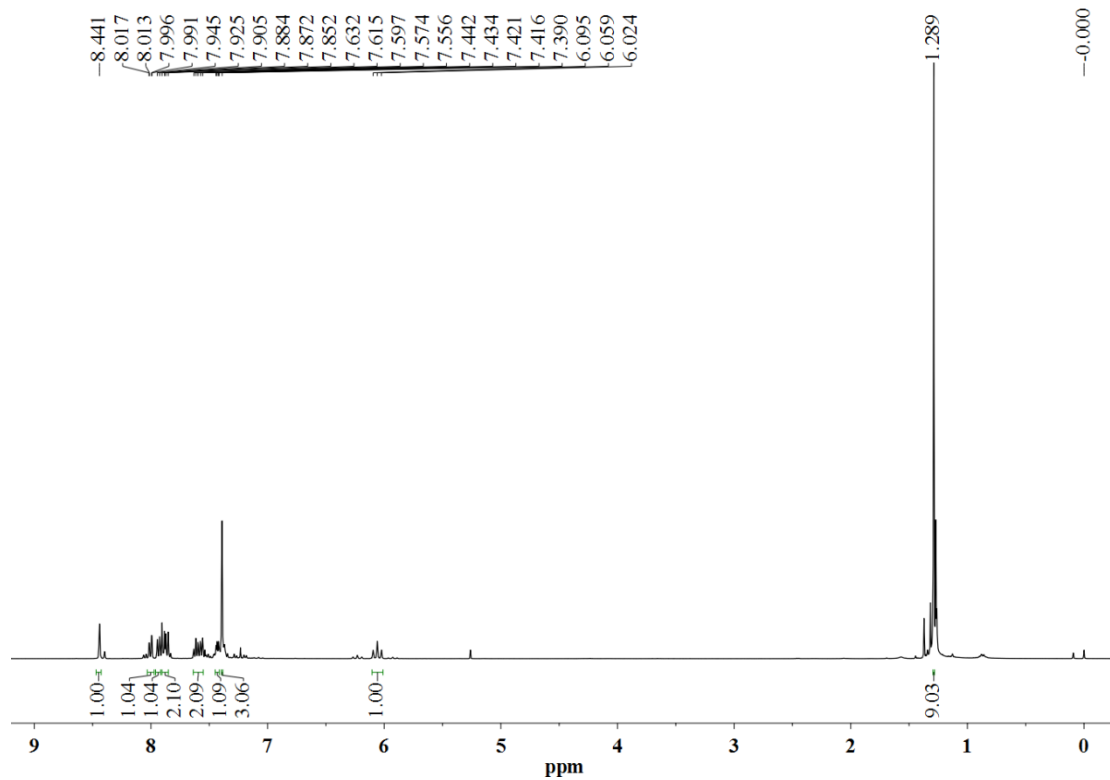

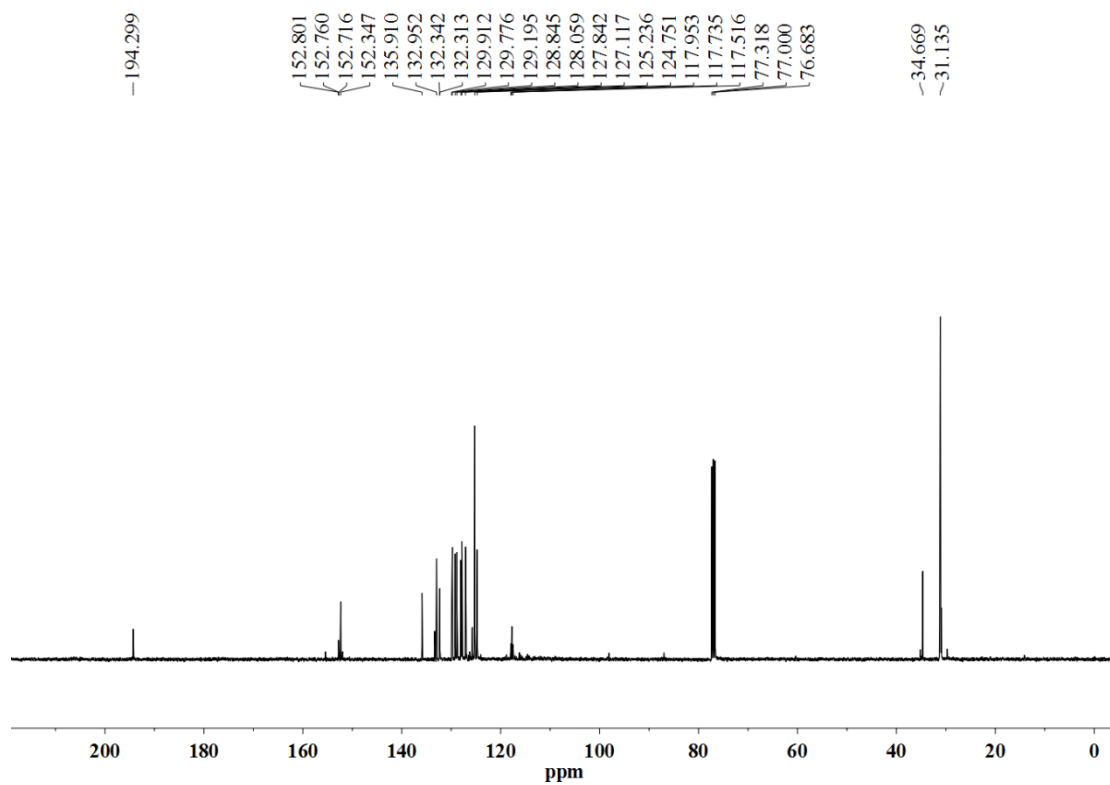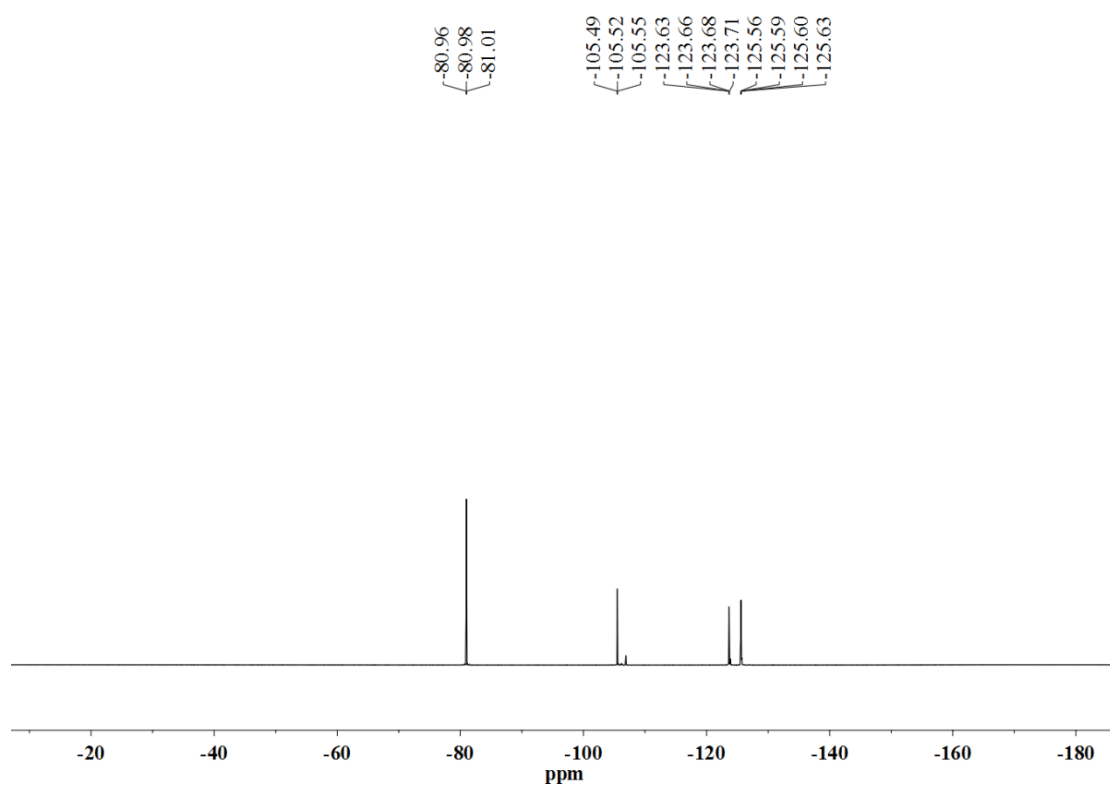

**1D-NOESY for Product 4k**

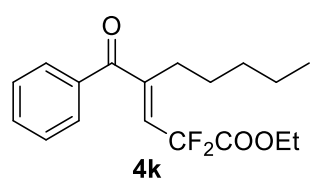

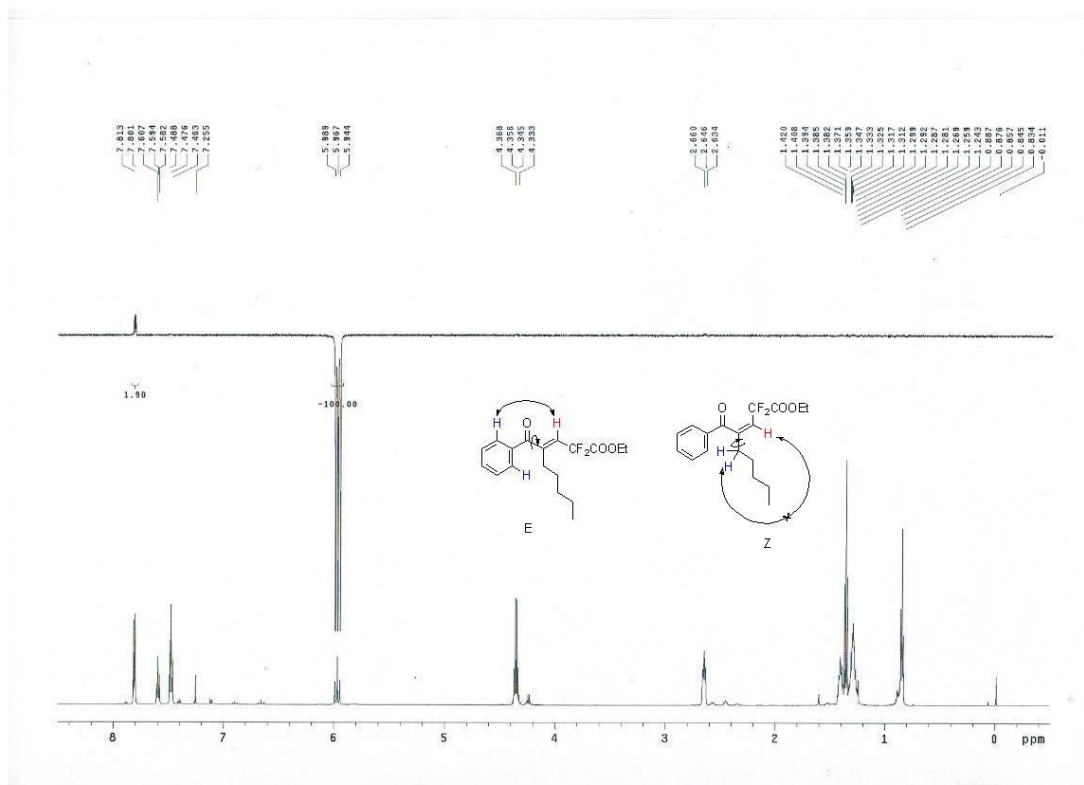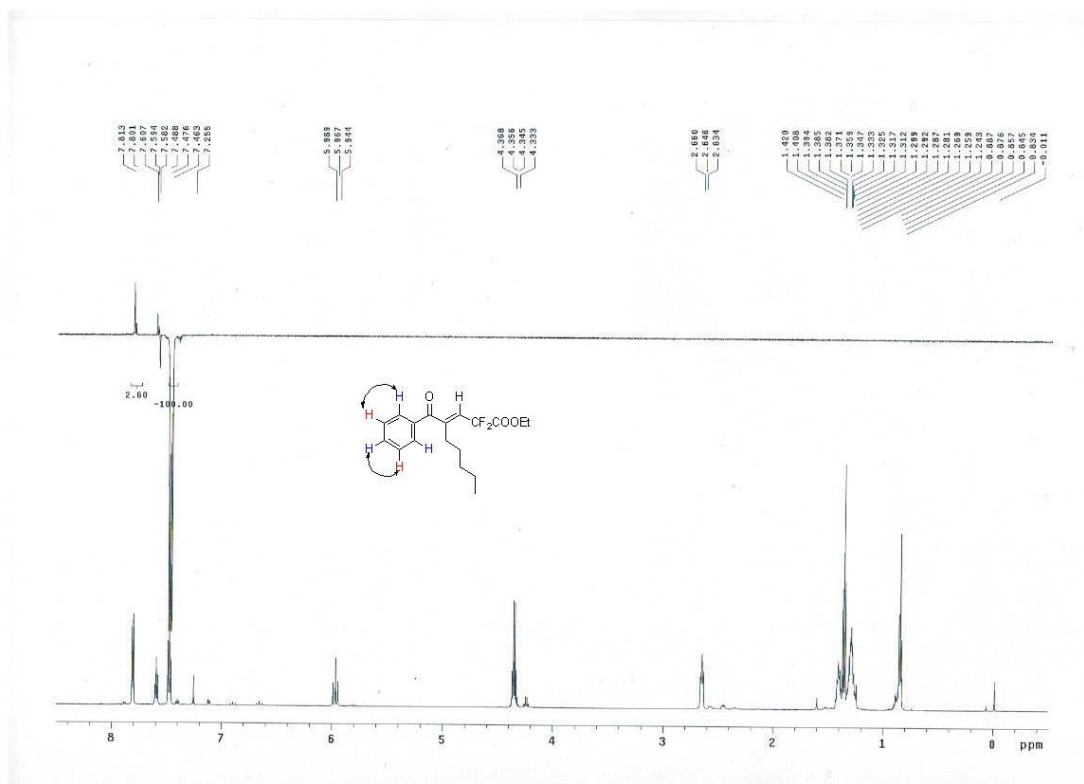

Supplement: c7cc00259a1.pdf [file c7cc00259a1.pdf]
